# Supplementary material
Source: publisher figshare collection journal article supplement (https://gsajournals.figshare.com/articles/dataset/_/6790526)
Supplement: Supplementary file 1 [file 2]

## Sheet: GLMnetsnpbydict
snpgene	snp	ldclust	Dictgene	s2	vcorr	signif	signif1	rsignif	rpcdg1	rpcdg2	rpcdg3	rpcdg4	rpcdg5	cq95	q951	cmedian	median1	cq90	q901	cq99	q991	cq1000	q10001	dictlength	SNPLENGTH	r95	r951	rmedian	rmedian1	r90	r901	r99	r991	r1000	r10001	rpcdec1	rpcjun1	rpcdec2	rpcjun2	rpcdec3	rpcjun3	rpcdec4	rpcjun4	rpcdec5	rpcjun5
5-HT1A	2214971807	395	dgo	Dict	0.5408				0.31	0.6	0.04	0.22	0.16	0.815	0.614	0.762	0.276	0.801	0.553	0.832	0.684	0.856	0.801	0.4284	0.129026	0.789	0.152	0.742	0.152	0.777	0.152	0.819	0.152	0.84	0.152	0.66	0.61	0.24	0.26	0.17	0.23	0.22	0.26	0.23	0.21
5-HT1A	2214971807	395	dll	Dict	0.6036				0.22	0.84	0.07	0.09	0.13	0.893	0.691	0.855	0.319	0.882	0.626	0.902	0.775	0.916	0.881	0.8412	0.129026	0.894	0.152	0.854	0.152	0.885	0.152	0.911	0.152	0.924	0.152	0.68	0.66	0.07	0.15	0.59	0.59	0.03	0.11	0.06	0.04
5-HT1A	2214971807	395	ds	Dict	0.689				0.39	0.84	0.12	0.23	0.09	0.937	0.759	0.903	0.356	0.929	0.684	0.943	0.852	0.947	0.903	5.7655	0.129026	0.932	0.152	0.898	0.152	0.925	0.152	0.944	0.152	0.956	0.152	0.89	0.85	0.21	0.26	0.14	0.21	0.26	0.31	0.22	0.21
5-HT1A	2214971807	395	ex	Dict	0.7667		*		0.04	0.82	0.43	0.12	0.04	0.914	0.73	0.883	0.322	0.91	0.661	0.92	0.832	0.947	0.875	5.4462	0.129026	0.918	0.152	0.88	0.152	0.909	0.152	0.929	0.152	0.944	0.152	0.82	0.81	0.21	0.17	0.21	0.15	0.42	0.47	0.01	0.01
5-HT1A	2214971807	395	ft	Dict	0.627				0.39	0.75	0.08	0.35	0.1	0.927	0.72	0.889	0.323	0.919	0.649	0.933	0.808	0.941	0.888	4.3023	0.129026	0.916	0.152	0.877	0.152	0.907	0.152	0.938	0.152	0.95	0.152	0.77	0.7	0.42	0.43	0.25	0.36	0.22	0.28	0.21	0.2
5-HT1A	2214962666	394	med	Dict	0.5501				0.17	0.63	0.24	0.37	0.19	0.855	0.625	0.8	0.281	0.843	0.558	0.875	0.718	0.896	0.847	0.768	0.0171752	0.84	0.152	0.789	0.152	0.828	0.152	0.862	0.152	0.893	0.152	0.54	0.51	0.21	0.19	0.24	0.32	0.14	0.06	0.15	0.1
5-HT1A	2214971807	395	rho	Dict	0.7009		*		0.42	0.64	0.27	0.24	0.06	0.883	0.676	0.842	0.302	0.873	0.632	0.896	0.784	0.901	0.867	0.6139	0.129026	0.882	0.152	0.835	0.152	0.87	0.152	0.895	0.152	0.913	0.152	0.45	0.44	0.28	0.37	0.56	0.47	0.39	0.44	0.18	0.17
5-HT1A	2214962666	394	sd	Dict	0.5409				0.34	0.63	0.37	0.24	0.02	0.856	0.667	0.823	0.286	0.851	0.597	0.87	0.767	0.871	0.849	5.3633	0.0171752	0.87	0.152	0.824	0.152	0.861	0.152	0.885	0.152	0.905	0.152	0.7	0.64	0.42	0.45	0.08	0.25	0.3	0.25	0.11	0.09
5-HT1A	2214971807	395	stan	Dict	0.5639				0.2	0.44	0.52	0.16	0.03	0.797	0.577	0.744	0.261	0.787	0.515	0.815	0.663	0.834	0.797	0.2999	0.129026	0.795	0.152	0.741	0.152	0.785	0.152	0.827	0.152	0.875	0.152	0.48	0.46	0.11	0.04	0.08	0.12	0.49	0.5	0.04	0.02
5-HT1A	2214971807	395	stg	Dict	0.6953		*		0.25	0.54	0.35	0.48	0.09	0.864	0.657	0.816	0.263	0.854	0.585	0.882	0.756	0.884	0.858	1.0297	0.129026	0.866	0.152	0.81	0.152	0.852	0.152	0.889	0.152	0.914	0.152	0.63	0.59	0.01	0.07	0.07	0.06	0.41	0.44	0.37	0.33
5-HT1A	2214962666	394	tmod	Dict	0.5842				0.2	0.49	0.1	0.6	0.13	0.821	0.592	0.765	0.243	0.814	0.518	0.84	0.668	0.868	0.753	0.6584	0.0171752	0.822	0.152	0.761	0.152	0.81	0.152	0.852	0.152	0.876	0.152	0.57	0.56	0.02	0.09	0.05	0.01	0.01	0.04	0.36	0.34
5-HT1A	2214971807	395	tx	Dict	0.5007				0.06	0.74	0.53	0.01	0.18	0.914	0.73	0.868	0.33	0.9	0.655	0.928	0.801	0.928	0.839	0.9684	0.129026	0.903	0.152	0.866	0.152	0.895	0.152	0.917	0.152	0.929	0.152	0.74	0.75	0.23	0.15	0.01	0.04	0.43	0.45	0.19	0.2
5-HT1A	2214962666	394	ubx	Dict	0.5788				0.45	0.7	0.38	0.06	0.15	0.916	0.737	0.881	0.325	0.908	0.669	0.924	0.823	0.952	0.891	0.6049	0.0171752	0.91	0.152	0.876	0.152	0.902	0.152	0.929	0.152	0.943	0.152	0.74	0.7	0.38	0.42	0.12	0.27	0.29	0.22	0.23	0.25
5-HT1A	2214971807	395	vn	Dict	0.5338		*		0.07	0.55	0.02	0.2	0.09	0.774	0.525	0.715	0.229	0.762	0.472	0.814	0.609	0.817	0.672	1.2207	0.129026	0.762	0.152	0.696	0.152	0.746	0.152	0.799	0.152	0.855	0.152	0.46	0.41	0.22	0.15	0.38	0.43	0.37	0.4	0.27	0.29
A2bp1	3110600149	610	btd	Dict	0.5391				0.83	0.17	0.22	0.01	0.09	0.891	0.703	0.854	0.334	0.882	0.638	0.904	0.803	0.91	0.863	0.5246	0.265312	0.889	0.152	0.851	0.152	0.882	0.152	0.899	0.152	0.921	0.152	0.06	0.02	0.53	0.66	0.51	0.36	0.14	0.16	0.45	0.44
A2bp1	3110600149	610	caup	Dict	0.515		*		0.39	0.27	0.36	0.28	0.08	0.739	0.514	0.677	0.216	0.722	0.459	0.77	0.596	0.771	0.643	0.3834	0.265312	0.746	0.152	0.685	0.152	0.729	0.152	0.769	0.152	0.794	0.152	0.08	0.11	0.36	0.43	0.31	0.18	0.42	0.43	0.06	0.06
A2bp1	3110600149	610	cg12934	Dict	0.6475		**		0.35	0.21	0.02	0.25	0.4	0.764	0.482	0.69	0.188	0.751	0.41	0.785	0.57	0.829	0.757	1.9159	0.265312	0.754	0.152	0.677	0.152	0.735	0.152	0.784	0.152	0.818	0.152	0.03	0.05	0.27	0.39	0.55	0.43	0.12	0.17	0.32	0.33
A2bp1	3110600149	610	cg34394	Dict	0.6806		**		0.47	0.1	0.1	0.25	0.48	0.803	0.521	0.728	0.219	0.777	0.464	0.823	0.611	0.862	0.716	2.1385	0.265312	0.804	0.152	0.728	0.152	0.785	0.152	0.843	0.152	0.876	0.152	0.11	0.08	0.38	0.51	0.58	0.42	0.19	0.24	0.3	0.32
A2bp1	3110600149	610	dco	Dict	0.5002				0.23	0.23	0.11	0.84	0.13	0.829	0.53	0.77	0.204	0.815	0.449	0.846	0.65	0.848	0.815	0.6512	0.265312	0.845	0.152	0.775	0.152	0.828	0.152	0.872	0.152	0.891	0.152	0.18	0.13	0.33	0.29	0.18	0.25	0.24	0.26	0.44	0.41
A2bp1	3110600149	610	dpp	Dict	0.5073				0.44	0.75	0.19	0.01	0.02	0.891	0.7	0.852	0.316	0.883	0.644	0.907	0.794	0.913	0.856	0.4649	0.265312	0.891	0.152	0.853	0.152	0.884	0.152	0.902	0.152	0.92	0.152	0.58	0.59	0.35	0.4	0.49	0.42	0.15	0.2	0.22	0.21
A2bp1	3110600149	610	egfr	Dict	0.6312		*		0.7	0.16	0.09	0.25	0.03	0.856	0.625	0.805	0.283	0.849	0.568	0.871	0.727	0.881	0.797	0.9394	0.265312	0.846	0.152	0.794	0.152	0.834	0.152	0.864	0.152	0.892	0.152	0.11	0.12	0.18	0.37	0.69	0.62	0.11	0.15	0.33	0.32
A2bp1	3110600149	610	gef64c	Dict	0.6988		**		0.34	0.17	0.06	0.37	0.36	0.75	0.491	0.683	0.193	0.737	0.434	0.789	0.587	0.811	0.694	1.6637	0.265312	0.755	0.152	0.672	0.152	0.734	0.152	0.79	0.152	0.821	0.152	0.02	0.01	0.2	0.32	0.54	0.43	0.26	0.3	0.29	0.29
A2bp1	3110600149	610	hh	Dict	0.5624		*		0.06	0.4	0.21	0.41	0.25	0.803	0.507	0.73	0.204	0.783	0.439	0.832	0.587	0.842	0.718	1.466	0.265312	0.792	0.152	0.721	0.152	0.776	0.152	0.828	0.152	0.888	0.152	0.37	0.39	0.3	0.3	0.25	0.15	0.14	0.17	0.55	0.54
A2bp1	3110600149	610	mer	Dict	0.6713		*		0.55	0.22	0.26	0.44	0.25	0.801	0.584	0.747	0.252	0.783	0.511	0.832	0.672	0.836	0.714	0.5311	0.265312	0.805	0.152	0.756	0.152	0.794	0.152	0.829	0.152	0.878	0.152	0.03	0.03	0.1	0.25	0.57	0.55	0.11	0.08	0.08	0.08
A2bp1	3110600149	610	mrp	Dict	0.6925		**		0.36	0.11	0.15	0.49	0.18	0.724	0.477	0.653	0.187	0.71	0.413	0.754	0.571	0.812	0.696	0.4417	0.265312	0.738	0.152	0.668	0.152	0.72	0.152	0.771	0.152	0.835	0.152	0.15	0.19	0.14	0.05	0.65	0.63	0.32	0.36	0.01	0.01
A2bp1	3110600149	610	neur	Dict	0.6794		**		0.45	0.24	0.14	0.21	0.46	0.814	0.539	0.742	0.227	0.798	0.476	0.833	0.64	0.843	0.761	2.4309	0.265312	0.81	0.152	0.744	0.152	0.797	0.152	0.841	0.152	0.868	0.152	0.06	0.09	0.43	0.54	0.56	0.4	0.18	0.23	0.3	0.32
A2bp1	3110600149	610	rho	Dict	0.588				0.42	0.64	0.27	0.24	0.06	0.883	0.676	0.842	0.302	0.873	0.632	0.896	0.784	0.901	0.867	0.6139	0.265312	0.882	0.152	0.835	0.152	0.87	0.152	0.895	0.152	0.913	0.152	0.45	0.44	0.28	0.37	0.56	0.47	0.39	0.44	0.18	0.17
A2bp1	3110600149	610	sd	Muta	0.6936		**		0.58	0.16	0.17	0.41	0.11	0.76	0.568	0.706	0.264	0.746	0.497	0.791	0.631	0.798	0.704	0.009	0.265312	0.778	0.152	0.726	0.152	0.767	0.152	0.799	0.152	0.844	0.152	0.13	0.14	0.1	0.29	0.69	0.63	0.11	0.16	0.02	0.04
A2bp1	3110600149	610	socs36e	Dict	0.5211				0.74	0.08	0.47	0.09	0.11	0.886	0.717	0.854	0.333	0.88	0.654	0.898	0.808	0.901	0.891	0.4292	0.265312	0.88	0.152	0.846	0.152	0.872	0.152	0.895	0.152	0.911	0.152	0.19	0.17	0.15	0.33	0.64	0.63	0.43	0.39	0.26	0.24
A2bp1	3110600149	610	sog	Dict	0.5372				0.53	0.17	0.36	0.18	0.04	0.794	0.601	0.737	0.279	0.78	0.545	0.816	0.693	0.827	0.806	0.8503	0.265312	0.793	0.152	0.735	0.152	0.778	0.152	0.817	0.152	0.858	0.152	0.13	0.17	0.18	0.03	0.7	0.73	0.04	0.09	0.43	0.41
A2bp1	3110600149	610	tango14	Dict	0.6815				0.87	0.17	0.08	0.09	0.3	0.899	0.736	0.871	0.356	0.894	0.669	0.914	0.821	0.916	0.86	1.4426	0.265312	0.909	0.152	0.875	0.152	0.902	0.152	0.923	0.152	0.932	0.152	0.16	0.13	0.48	0.67	0.77	0.62	0.08	0.02	0.09	0.05
A2bp1	3110600149	610	trh	Dict	0.5766		*		0.53	0.15	0.11	0.12	0.43	0.775	0.527	0.711	0.231	0.758	0.467	0.81	0.62	0.815	0.708	0.8179	0.265312	0.778	0.152	0.714	0.152	0.764	0.152	0.808	0.152	0.854	0.152	0.09	0.08	0.37	0.52	0.61	0.45	0.21	0.27	0.06	0.09
AP-50	3218289966	872	btd	Dict	0.8183		**		0.83	0.17	0.22	0.01	0.09	0.891	0.703	0.854	0.334	0.882	0.638	0.904	0.803	0.91	0.863	0.5246	0.887823	0.889	0.152	0.851	0.152	0.882	0.152	0.899	0.152	0.921	0.152	0.06	0.02	0.53	0.66	0.51	0.36	0.14	0.16	0.45	0.44
AP-50	3218289966	872	cg14147	Dict	0.5943		*		0.55	0.18	0.24	0.12	0.04	0.733	0.54	0.685	0.256	0.721	0.496	0.752	0.618	0.76	0.693	0.3374	0.887823	0.737	0.152	0.68	0.152	0.721	0.152	0.759	0.152	0.801	0.152	0.38	0.37	0.21	0.34	0.32	0.21	0.4	0.39	0.38	0.38
AP-50	3218289966	872	ct	Muta	0.6549		**		0.54	0.02	0.38	0.03	0.09	0.705	0.538	0.664	0.253	0.701	0.484	0.718	0.607	0.733	0.65	0.0056	0.887823	0.715	0.152	0.672	0.152	0.705	0.152	0.731	0.152	0.766	0.152	0.12	0.08	0.47	0.51	0.18	0.03	0.25	0.22	0.25	0.27
AP-50	3218289966	872	dally	Dict	0.7088		*		0.64	0.29	0.47	0.31	0.12	0.906	0.705	0.866	0.306	0.895	0.649	0.919	0.783	0.941	0.845	0.8955	0.887823	0.912	0.152	0.867	0.152	0.901	0.152	0.928	0.152	0.935	0.152	0.18	0.23	0.62	0.64	0.21	0.06	0.18	0.18	0.57	0.56
AP-50	3218289966	872	egfr	Dict	0.6881		*		0.7	0.16	0.09	0.25	0.03	0.856	0.625	0.805	0.283	0.849	0.568	0.871	0.727	0.881	0.797	0.9394	0.887823	0.846	0.152	0.794	0.152	0.834	0.152	0.864	0.152	0.892	0.152	0.11	0.12	0.18	0.37	0.69	0.62	0.11	0.15	0.33	0.32
AP-50	3218289966	872	emc	Dict	0.5527				0.54	0.06	0.44	0.37	0.03	0.797	0.601	0.752	0.255	0.791	0.535	0.833	0.683	0.848	0.776	0.3552	0.887823	0.815	0.152	0.761	0.152	0.801	0.152	0.836	0.152	0.867	0.152	0.15	0.08	0.65	0.67	0.07	0.11	0.07	0.06	0.31	0.3
AP-50	3218289966	872	fj	Dict	0.5928				0.84	0.35	0.16	0.16	0.06	0.938	0.763	0.909	0.355	0.932	0.705	0.952	0.857	0.956	0.929	2.0627	0.887823	0.928	0.152	0.894	0.152	0.921	0.152	0.941	0.152	0.953	0.152	0.59	0.54	0.46	0.61	0.39	0.27	0.29	0.29	0.37	0.34
AP-50	3218289966	872	kn	Dict	0.5928				0.64	0.28	0.11	0.11	0.28	0.824	0.637	0.777	0.296	0.81	0.565	0.844	0.703	0.867	0.779	0.3931	0.887823	0.815	0.152	0.763	0.152	0.803	0.152	0.833	0.152	0.858	0.152	0.43	0.39	0.35	0.43	0.14	0.05	0.01	0.04	0.51	0.51
AP-50	3218289966	872	mad	Dict	0.5995				0.84	0.08	0.2	0.2	0.07	0.894	0.724	0.866	0.359	0.887	0.661	0.91	0.811	0.922	0.847	0.5446	0.887823	0.889	0.152	0.854	0.152	0.881	0.152	0.901	0.152	0.907	0.152	0.2	0.16	0.38	0.54	0.57	0.49	0.28	0.25	0.5	0.46
AP-50	3218289966	872	mer	Dict	0.5226				0.55	0.22	0.26	0.44	0.25	0.801	0.584	0.747	0.252	0.783	0.511	0.832	0.672	0.836	0.714	0.5311	0.887823	0.805	0.152	0.756	0.152	0.794	0.152	0.829	0.152	0.878	0.152	0.03	0.03	0.1	0.25	0.57	0.55	0.11	0.08	0.08	0.08
AP-50	3218289966	872	rho	Dict	0.5557				0.42	0.64	0.27	0.24	0.06	0.883	0.676	0.842	0.302	0.873	0.632	0.896	0.784	0.901	0.867	0.6139	0.887823	0.882	0.152	0.835	0.152	0.87	0.152	0.895	0.152	0.913	0.152	0.45	0.44	0.28	0.37	0.56	0.47	0.39	0.44	0.18	0.17
AP-50	3218289966	872	sgg	Dict	0.5755				0.51	0.37	0.25	0.17	0.44	0.862	0.625	0.799	0.263	0.848	0.576	0.881	0.727	0.9	0.823	1.7731	0.887823	0.841	0.152	0.783	0.152	0.828	0.152	0.862	0.152	0.907	0.152	0.21	0.23	0.29	0.34	0.24	0.18	0.23	0.22	0.74	0.74
AP-50	3218289966	872	tai	Dict	0.8533		**		0.71	0.17	0.56	0.09	0.01	0.894	0.73	0.862	0.338	0.889	0.654	0.907	0.805	0.908	0.848	0.4654	0.887823	0.899	0.152	0.868	0.152	0.893	0.152	0.908	0.152	0.921	0.152	0	0.07	0.78	0.84	0.33	0.1	0.31	0.32	0.15	0.14
AP-50	3218289966	872	tango14	Dict	0.632				0.87	0.17	0.08	0.09	0.3	0.899	0.736	0.871	0.356	0.894	0.669	0.914	0.821	0.916	0.86	1.4426	0.887823	0.909	0.152	0.875	0.152	0.902	0.152	0.923	0.152	0.932	0.152	0.16	0.13	0.48	0.67	0.77	0.62	0.08	0.02	0.09	0.05
AP-50	3218289966	872	ubx	Dict	0.5919				0.45	0.7	0.38	0.06	0.15	0.916	0.737	0.881	0.325	0.908	0.669	0.924	0.823	0.952	0.891	0.6049	0.887823	0.91	0.152	0.876	0.152	0.902	0.152	0.929	0.152	0.943	0.152	0.74	0.7	0.38	0.42	0.12	0.27	0.29	0.22	0.23	0.25
AQP	2209101842	347	ap	Dict	0.6429				0.13	0.81	0.11	0.15	0.22	0.856	0.666	0.815	0.299	0.847	0.607	0.87	0.745	0.871	0.826	0.394	0.136225	0.86	0.152	0.82	0.152	0.852	0.152	0.875	0.152	0.892	0.152	0.74	0.76	0.27	0.23	0.17	0.16	0.1	0.06	0.21	0.18
AQP	2209101842	347	brk	Dict	0.5133				0.23	0.77	0.25	0.5	0.11	0.919	0.718	0.886	0.323	0.914	0.651	0.937	0.802	0.946	0.885	2.1159	0.136225	0.925	0.152	0.883	0.152	0.916	0.152	0.939	0.152	0.957	0.152	0.69	0.71	0.37	0.36	0.24	0.17	0.03	0.08	0.36	0.33
AQP	2209101842	347	bun	Dict	0.7327		*		0.18	0.78	0.06	0.17	0.19	0.885	0.664	0.841	0.31	0.875	0.609	0.91	0.742	0.935	0.885	0.7822	0.136225	0.887	0.152	0.834	0.152	0.874	0.152	0.905	0.152	0.925	0.152	0.54	0.52	0.04	0.14	0.61	0.58	0.13	0.22	0.05	0.09
AQP	2209101842	347	ex	Dict	0.5189				0.04	0.82	0.43	0.12	0.04	0.914	0.73	0.883	0.322	0.91	0.661	0.92	0.832	0.947	0.875	5.4462	0.136225	0.918	0.152	0.88	0.152	0.909	0.152	0.929	0.152	0.944	0.152	0.82	0.81	0.21	0.17	0.21	0.15	0.42	0.47	0.01	0.01
AQP	2209101842	347	inr	Dict	0.5443				0.32	0.49	0.12	0.08	0.29	0.794	0.561	0.744	0.24	0.782	0.496	0.807	0.653	0.838	0.701	0.5695	0.136225	0.795	0.152	0.731	0.152	0.778	0.152	0.824	0.152	0.855	0.152	0.33	0.36	0.37	0.42	0.41	0.3	0.06	0.11	0.09	0.12
AQP	2209101842	347	kay	Dict	0.6452		*		0.28	0.64	0.08	0.07	0.3	0.825	0.609	0.772	0.243	0.814	0.538	0.851	0.678	0.862	0.785	0.4534	0.136225	0.821	0.152	0.767	0.152	0.806	0.152	0.839	0.152	0.857	0.152	0.47	0.49	0.19	0.23	0.32	0.32	0.18	0.13	0.28	0.24
AQP	2209101842	347	med	Dict	0.5504				0.17	0.63	0.24	0.37	0.19	0.855	0.625	0.8	0.281	0.843	0.558	0.875	0.718	0.896	0.847	0.768	0.136225	0.84	0.152	0.789	0.152	0.828	0.152	0.862	0.152	0.893	0.152	0.54	0.51	0.21	0.19	0.24	0.32	0.14	0.06	0.15	0.1
AQP	2209101842	347	pnt	Dict	0.5764				0.28	0.69	0.03	0.39	0.09	0.858	0.653	0.816	0.281	0.853	0.584	0.873	0.772	0.886	0.829	0.9325	0.136225	0.843	0.152	0.802	0.152	0.836	0.152	0.865	0.152	0.891	0.152	0.52	0.53	0.21	0.26	0.4	0.37	0.11	0.04	0.34	0.29
Ac13E	1015410847	83	brk	Dict	0.6878				0.23	0.77	0.25	0.5	0.11	0.919	0.718	0.886	0.323	0.914	0.651	0.937	0.802	0.946	0.885	2.1159	0.449167	0.925	0.152	0.883	0.152	0.916	0.152	0.939	0.152	0.957	0.152	0.69	0.71	0.37	0.36	0.24	0.17	0.03	0.08	0.36	0.33
Ac13E	1015410826	83	brk	Dict	0.5696				0.23	0.77	0.25	0.5	0.11	0.919	0.718	0.886	0.323	0.914	0.651	0.937	0.802	0.946	0.885	2.1159	0.140588	0.925	0.152	0.883	0.152	0.916	0.152	0.939	0.152	0.957	0.152	0.69	0.71	0.37	0.36	0.24	0.17	0.03	0.08	0.36	0.33
Ac13E	1015410847	83	bx	Dict	0.6507				0.2	0.83	0.2	0.29	0.05	0.899	0.714	0.867	0.309	0.895	0.651	0.907	0.792	0.914	0.858	1.1999	0.449167	0.901	0.152	0.863	0.152	0.894	0.152	0.918	0.152	0.934	0.152	0.79	0.8	0.29	0.26	0.25	0.22	0.02	0.06	0.34	0.32
Ac13E	1015410847	83	cyce	Dict	0.7311		*		0.06	0.47	0.74	0.25	0.09	0.906	0.718	0.874	0.309	0.899	0.652	0.925	0.798	0.928	0.888	0.9349	0.449167	0.901	0.152	0.857	0.152	0.891	0.152	0.92	0.152	0.936	0.152	0.46	0.5	0.47	0.39	0.06	0.21	0.54	0.55	0.2	0.19
Ac13E	1015410826	83	cyce	Dict	0.5894				0.06	0.47	0.74	0.25	0.09	0.906	0.718	0.874	0.309	0.899	0.652	0.925	0.798	0.928	0.888	0.9349	0.140588	0.901	0.152	0.857	0.152	0.891	0.152	0.92	0.152	0.936	0.152	0.46	0.5	0.47	0.39	0.06	0.21	0.54	0.55	0.2	0.19
Ac13E	1015410826	83	d	Dict	0.5198		*		0.16	0.46	0.09	0.05	0.56	0.732	0.49	0.664	0.199	0.718	0.433	0.759	0.581	0.795	0.674	0.2325	0.140588	0.728	0.152	0.67	0.152	0.715	0.152	0.75	0.152	0.79	0.152	0.42	0.39	0.05	0.02	0.29	0.29	0.05	0.03	0.37	0.4
Ac13E	1015410847	83	dgo	Dict	0.5307				0.31	0.6	0.04	0.22	0.16	0.815	0.614	0.762	0.276	0.801	0.553	0.832	0.684	0.856	0.801	0.4284	0.449167	0.789	0.152	0.742	0.152	0.777	0.152	0.819	0.152	0.84	0.152	0.66	0.61	0.24	0.26	0.17	0.23	0.22	0.26	0.23	0.21
Ac13E	1015410847	83	dll	Dict	0.5289				0.22	0.84	0.07	0.09	0.13	0.893	0.691	0.855	0.319	0.882	0.626	0.902	0.775	0.916	0.881	0.8412	0.449167	0.894	0.152	0.854	0.152	0.885	0.152	0.911	0.152	0.924	0.152	0.68	0.66	0.07	0.15	0.59	0.59	0.03	0.11	0.06	0.04
Ac13E	1015410847	83	dpp	Dict	0.5226				0.44	0.75	0.19	0.01	0.02	0.891	0.7	0.852	0.316	0.883	0.644	0.907	0.794	0.913	0.856	0.4649	0.449167	0.891	0.152	0.853	0.152	0.884	0.152	0.902	0.152	0.92	0.152	0.58	0.59	0.35	0.4	0.49	0.42	0.15	0.2	0.22	0.21
Ac13E	1015410847	83	ds	Dict	0.6609				0.39	0.84	0.12	0.23	0.09	0.937	0.759	0.903	0.356	0.929	0.684	0.943	0.852	0.947	0.903	5.7655	0.449167	0.932	0.152	0.898	0.152	0.925	0.152	0.944	0.152	0.956	0.152	0.89	0.85	0.21	0.26	0.14	0.21	0.26	0.31	0.22	0.21
Ac13E	1015410847	83	ex	Dict	0.7621		*		0.04	0.82	0.43	0.12	0.04	0.914	0.73	0.883	0.322	0.91	0.661	0.92	0.832	0.947	0.875	5.4462	0.449167	0.918	0.152	0.88	0.152	0.909	0.152	0.929	0.152	0.944	0.152	0.82	0.81	0.21	0.17	0.21	0.15	0.42	0.47	0.01	0.01
Ac13E	1015410826	83	ex	Dict	0.5517				0.04	0.82	0.43	0.12	0.04	0.914	0.73	0.883	0.322	0.91	0.661	0.92	0.832	0.947	0.875	5.4462	0.140588	0.918	0.152	0.88	0.152	0.909	0.152	0.929	0.152	0.944	0.152	0.82	0.81	0.21	0.17	0.21	0.15	0.42	0.47	0.01	0.01
Ac13E	1015410847	83	ft	Dict	0.5152				0.39	0.75	0.08	0.35	0.1	0.927	0.72	0.889	0.323	0.919	0.649	0.933	0.808	0.941	0.888	4.3023	0.449167	0.916	0.152	0.877	0.152	0.907	0.152	0.938	0.152	0.95	0.152	0.77	0.7	0.42	0.43	0.25	0.36	0.22	0.28	0.21	0.2
Ac13E	1015410847	83	fz	Dict	0.5601				0.06	0.7	0.17	0.26	0.24	0.85	0.643	0.804	0.281	0.839	0.574	0.861	0.74	0.866	0.798	0.4509	0.449167	0.841	0.152	0.79	0.152	0.826	0.152	0.861	0.152	0.882	0.152	0.77	0.78	0.15	0.08	0.06	0.08	0.02	0.03	0.39	0.4
Ac13E	1015410847	83	nmo	Dict	0.7286				0.31	0.81	0.35	0.29	0.15	0.94	0.734	0.907	0.346	0.934	0.656	0.96	0.831	0.961	0.909	2.0873	0.449167	0.938	0.152	0.902	0.152	0.931	0.152	0.953	0.152	0.963	0.152	0.92	0.92	0.07	0.06	0.16	0.13	0.17	0.2	0.2	0.2
Ac13E	1015410826	83	nmo	Dict	0.5132				0.31	0.81	0.35	0.29	0.15	0.94	0.734	0.907	0.346	0.934	0.656	0.96	0.831	0.961	0.909	2.0873	0.140588	0.938	0.152	0.902	0.152	0.931	0.152	0.953	0.152	0.963	0.152	0.92	0.92	0.07	0.06	0.16	0.13	0.17	0.2	0.2	0.2
Ac13E	1015410847	83	rho	Dict	0.5115				0.42	0.64	0.27	0.24	0.06	0.883	0.676	0.842	0.302	0.873	0.632	0.896	0.784	0.901	0.867	0.6139	0.449167	0.882	0.152	0.835	0.152	0.87	0.152	0.895	0.152	0.913	0.152	0.45	0.44	0.28	0.37	0.56	0.47	0.39	0.44	0.18	0.17
Ac13E	1015410847	83	stan	Dict	0.6011		*		0.2	0.44	0.52	0.16	0.03	0.797	0.577	0.744	0.261	0.787	0.515	0.815	0.663	0.834	0.797	0.2999	0.449167	0.795	0.152	0.741	0.152	0.785	0.152	0.827	0.152	0.875	0.152	0.48	0.46	0.11	0.04	0.08	0.12	0.49	0.5	0.04	0.02
Ac13E	1015410847	83	stg	Dict	0.6163				0.25	0.54	0.35	0.48	0.09	0.864	0.657	0.816	0.263	0.854	0.585	0.882	0.756	0.884	0.858	1.0297	0.449167	0.866	0.152	0.81	0.152	0.852	0.152	0.889	0.152	0.914	0.152	0.63	0.59	0.01	0.07	0.07	0.06	0.41	0.44	0.37	0.33
Ac13E	1015410847	83	tmod	Dict	0.5983		*		0.2	0.49	0.1	0.6	0.13	0.821	0.592	0.765	0.243	0.814	0.518	0.84	0.668	0.868	0.753	0.6584	0.449167	0.822	0.152	0.761	0.152	0.81	0.152	0.852	0.152	0.876	0.152	0.57	0.56	0.02	0.09	0.05	0.01	0.01	0.04	0.36	0.34
Ac13E	1015410826	83	tmod	Dict	0.5848				0.2	0.49	0.1	0.6	0.13	0.821	0.592	0.765	0.243	0.814	0.518	0.84	0.668	0.868	0.753	0.6584	0.140588	0.822	0.152	0.761	0.152	0.81	0.152	0.852	0.152	0.876	0.152	0.57	0.56	0.02	0.09	0.05	0.01	0.01	0.04	0.36	0.34
Ac13E	1015410847	83	tx	Dict	0.691				0.06	0.74	0.53	0.01	0.18	0.914	0.73	0.868	0.33	0.9	0.655	0.928	0.801	0.928	0.839	0.9684	0.449167	0.903	0.152	0.866	0.152	0.895	0.152	0.917	0.152	0.929	0.152	0.74	0.75	0.23	0.15	0.01	0.04	0.43	0.45	0.19	0.2
Ac13E	1015410847	83	wts	Dict	0.6279				0.36	0.69	0.38	0.08	0.22	0.894	0.718	0.857	0.324	0.886	0.645	0.917	0.809	0.926	0.882	0.9344	0.449167	0.887	0.152	0.845	0.152	0.877	0.152	0.901	0.152	0.918	0.152	0.79	0.77	0.09	0.2	0.16	0.12	0.41	0.42	0.22	0.24
Ac76E	3119954256	721	ap	Dict	0.5534				0.13	0.81	0.11	0.15	0.22	0.856	0.666	0.815	0.299	0.847	0.607	0.87	0.745	0.871	0.826	0.394	0.240399	0.86	0.152	0.82	0.152	0.852	0.152	0.875	0.152	0.892	0.152	0.74	0.76	0.27	0.23	0.17	0.16	0.1	0.06	0.21	0.18
Ac76E	3119935521	719	aret	Dict	0.6184				0.66	0.06	0.37	0.12	0	0.844	0.652	0.797	0.293	0.836	0.595	0.861	0.737	0.868	0.861	0.4688	0.120688	0.843	0.152	0.795	0.152	0.833	0.152	0.863	0.152	0.885	0.152	0.22	0.23	0.02	0.18	0.65	0.65	0.14	0.1	0.52	0.5
Ac76E	3119930851	720	bs	Dict	0.514		*		0.13	0.12	0.59	0.11	0.19	0.743	0.496	0.681	0.214	0.727	0.45	0.75	0.598	0.783	0.667	0.4761	0.211964	0.731	0.152	0.674	0.152	0.719	0.152	0.753	0.152	0.785	0.152	0.05	0.08	0.32	0.29	0.1	0.22	0.53	0.5	0.19	0.2
Ac76E	3119930851	720	bsk	Dict	0.5035				0.12	0.05	0.62	0.23	0.07	0.742	0.522	0.689	0.218	0.733	0.458	0.75	0.61	0.791	0.715	0.6289	0.211964	0.771	0.152	0.715	0.152	0.759	0.152	0.802	0.152	0.862	0.152	0.22	0.28	0.54	0.4	0.36	0.51	0.22	0.19	0.51	0.49
Ac76E	3119935521	719	btd	Dict	0.5444				0.83	0.17	0.22	0.01	0.09	0.891	0.703	0.854	0.334	0.882	0.638	0.904	0.803	0.91	0.863	0.5246	0.120688	0.889	0.152	0.851	0.152	0.882	0.152	0.899	0.152	0.921	0.152	0.06	0.02	0.53	0.66	0.51	0.36	0.14	0.16	0.45	0.44
Ac76E	3119954256	721	btd	Dict	0.5387				0.83	0.17	0.22	0.01	0.09	0.891	0.703	0.854	0.334	0.882	0.638	0.904	0.803	0.91	0.863	0.5246	0.240399	0.889	0.152	0.851	0.152	0.882	0.152	0.899	0.152	0.921	0.152	0.06	0.02	0.53	0.66	0.51	0.36	0.14	0.16	0.45	0.44
Ac76E	3119954256	721	bx	Dict	0.5756				0.2	0.83	0.2	0.29	0.05	0.899	0.714	0.867	0.309	0.895	0.651	0.907	0.792	0.914	0.858	1.1999	0.240399	0.901	0.152	0.863	0.152	0.894	0.152	0.918	0.152	0.934	0.152	0.79	0.8	0.29	0.26	0.25	0.22	0.02	0.06	0.34	0.32
Ac76E	3119954256	721	caup	Dict	0.5462		*		0.39	0.27	0.36	0.28	0.08	0.739	0.514	0.677	0.216	0.722	0.459	0.77	0.596	0.771	0.643	0.3834	0.240399	0.746	0.152	0.685	0.152	0.729	0.152	0.769	0.152	0.794	0.152	0.08	0.11	0.36	0.43	0.31	0.18	0.42	0.43	0.06	0.06
Ac76E	3119935521	719	dad	Dict	0.5821				0.6	0.35	0.36	0.11	0.33	0.869	0.651	0.825	0.301	0.858	0.591	0.884	0.743	0.901	0.864	0.3276	0.120688	0.857	0.152	0.812	0.152	0.849	0.152	0.877	0.152	0.897	0.152	0.02	0.03	0.18	0.36	0.74	0.69	0.29	0.21	0.1	0.04
Ac76E	3119954256	721	dally	Dict	0.5295				0.64	0.29	0.47	0.31	0.12	0.906	0.705	0.866	0.306	0.895	0.649	0.919	0.783	0.941	0.845	0.8955	0.240399	0.912	0.152	0.867	0.152	0.901	0.152	0.928	0.152	0.935	0.152	0.18	0.23	0.62	0.64	0.21	0.06	0.18	0.18	0.57	0.56
Ac76E	3119954256	721	dll	Dict	0.5587				0.22	0.84	0.07	0.09	0.13	0.893	0.691	0.855	0.319	0.882	0.626	0.902	0.775	0.916	0.881	0.8412	0.240399	0.894	0.152	0.854	0.152	0.885	0.152	0.911	0.152	0.924	0.152	0.68	0.66	0.07	0.15	0.59	0.59	0.03	0.11	0.06	0.04
Ac76E	3119954256	721	dpp	Dict	0.6795				0.44	0.75	0.19	0.01	0.02	0.891	0.7	0.852	0.316	0.883	0.644	0.907	0.794	0.913	0.856	0.4649	0.240399	0.891	0.152	0.853	0.152	0.884	0.152	0.902	0.152	0.92	0.152	0.58	0.59	0.35	0.4	0.49	0.42	0.15	0.2	0.22	0.21
Ac76E	3119935521	719	dsh	Dict	0.5125				0.68	0.51	0.24	0.14	0.1	0.91	0.72	0.873	0.33	0.9	0.649	0.92	0.793	0.934	0.84	1.1394	0.120688	0.91	0.152	0.871	0.152	0.9	0.152	0.923	0.152	0.937	0.152	0.68	0.66	0.19	0.35	0.33	0.27	0.26	0.26	0.32	0.3
Ac76E	3119954256	721	ex	Dict	0.6891				0.04	0.82	0.43	0.12	0.04	0.914	0.73	0.883	0.322	0.91	0.661	0.92	0.832	0.947	0.875	5.4462	0.240399	0.918	0.152	0.88	0.152	0.909	0.152	0.929	0.152	0.944	0.152	0.82	0.81	0.21	0.17	0.21	0.15	0.42	0.47	0.01	0.01
Ac76E	3119954256	721	kay	Dict	0.5231				0.28	0.64	0.08	0.07	0.3	0.825	0.609	0.772	0.243	0.814	0.538	0.851	0.678	0.862	0.785	0.4534	0.240399	0.821	0.152	0.767	0.152	0.806	0.152	0.839	0.152	0.857	0.152	0.47	0.49	0.19	0.23	0.32	0.32	0.18	0.13	0.28	0.24
Ac76E	3119930851	720	os	Dict	0.5488				0.36	0.12	0.65	0.28	0	0.816	0.603	0.775	0.255	0.808	0.547	0.844	0.699	0.858	0.789	0.2858	0.211964	0.823	0.152	0.777	0.152	0.814	0.152	0.838	0.152	0.855	0.152	0.09	0.09	0.09	0.04	0.44	0.5	0.58	0.54	0.23	0.18
Ac76E	3119935521	719	poc1	Dict	0.5113				0.34	0.49	0.08	0.28	0.08	0.801	0.576	0.742	0.257	0.791	0.523	0.832	0.664	0.843	0.724	0.4028	0.120688	0.795	0.152	0.734	0.152	0.78	0.152	0.824	0.152	0.87	0.152	0.31	0.29	0.02	0.07	0.38	0.38	0.25	0.29	0.69	0.68
Ac76E	3119935521	719	ptc	Dict	0.5131				0.6	0.19	0.19	0.05	0.47	0.847	0.608	0.783	0.28	0.832	0.556	0.855	0.7	0.862	0.784	1.9546	0.120688	0.831	0.152	0.769	0.152	0.813	0.152	0.863	0.152	0.884	0.152	0.46	0.46	0.19	0.39	0.58	0.48	0.06	0.01	0.05	0.01
Ac76E	3119954256	721	rho	Dict	0.7449		*		0.42	0.64	0.27	0.24	0.06	0.883	0.676	0.842	0.302	0.873	0.632	0.896	0.784	0.901	0.867	0.6139	0.240399	0.882	0.152	0.835	0.152	0.87	0.152	0.895	0.152	0.913	0.152	0.45	0.44	0.28	0.37	0.56	0.47	0.39	0.44	0.18	0.17
Ac76E	3119930851	720	rpt1	Dict	0.6853		**		0.04	0.25	0.66	0.15	0.07	0.793	0.555	0.721	0.245	0.77	0.503	0.816	0.623	0.817	0.725	0.264	0.211964	0.775	0.152	0.72	0.152	0.763	0.152	0.791	0.152	0.839	0.152	0.12	0.08	0.45	0.35	0.32	0.47	0.36	0.32	0.25	0.23
Ac76E	3119954256	721	sav	Dict	0.6805				0.34	0.81	0.01	0.18	0.13	0.914	0.732	0.873	0.328	0.904	0.656	0.928	0.795	0.931	0.931	0.5947	0.240399	0.909	0.152	0.868	0.152	0.902	0.152	0.929	0.152	0.952	0.152	0.58	0.56	0.05	0.15	0.59	0.59	0.16	0.23	0.3	0.28
Ac76E	3119954256	721	sgg	Dict	0.6458		*		0.51	0.37	0.25	0.17	0.44	0.862	0.625	0.799	0.263	0.848	0.576	0.881	0.727	0.9	0.823	1.7731	0.240399	0.841	0.152	0.783	0.152	0.828	0.152	0.862	0.152	0.907	0.152	0.21	0.23	0.29	0.34	0.24	0.18	0.23	0.22	0.74	0.74
Ac76E	3119935521	719	sls	Dict	0.555				0.72	0.33	0.05	0.14	0.22	0.84	0.68	0.801	0.314	0.832	0.622	0.857	0.744	0.874	0.801	0.5182	0.120688	0.839	0.152	0.799	0.152	0.832	0.152	0.859	0.152	0.883	0.152	0.03	0.07	0.46	0.61	0.64	0.52	0.12	0.06	0.21	0.16
Ac76E	3119935521	719	socs36e	Dict	0.5032				0.74	0.08	0.47	0.09	0.11	0.886	0.717	0.854	0.333	0.88	0.654	0.898	0.808	0.901	0.891	0.4292	0.120688	0.88	0.152	0.846	0.152	0.872	0.152	0.895	0.152	0.911	0.152	0.19	0.17	0.15	0.33	0.64	0.63	0.43	0.39	0.26	0.24
Ac76E	3119954256	721	spi	Dict	0.5923				0.23	0.37	0.57	0.11	0.37	0.827	0.601	0.778	0.242	0.821	0.54	0.837	0.698	0.84	0.809	0.4719	0.240399	0.83	0.152	0.779	0.152	0.818	0.152	0.856	0.152	0.893	0.152	0.4	0.43	0.43	0.36	0.07	0.16	0.33	0.31	0.43	0.45
Ac76E	3119954256	721	tai	Dict	0.6351				0.71	0.17	0.56	0.09	0.01	0.894	0.73	0.862	0.338	0.889	0.654	0.907	0.805	0.908	0.848	0.4654	0.240399	0.899	0.152	0.868	0.152	0.893	0.152	0.908	0.152	0.921	0.152	0	0.07	0.78	0.84	0.33	0.1	0.31	0.32	0.15	0.14
Ac76E	3119935521	719	tango14	Dict	0.6482				0.87	0.17	0.08	0.09	0.3	0.899	0.736	0.871	0.356	0.894	0.669	0.914	0.821	0.916	0.86	1.4426	0.120688	0.909	0.152	0.875	0.152	0.902	0.152	0.923	0.152	0.932	0.152	0.16	0.13	0.48	0.67	0.77	0.62	0.08	0.02	0.09	0.05
Ac76E	3119954256	721	tx	Dict	0.6093				0.06	0.74	0.53	0.01	0.18	0.914	0.73	0.868	0.33	0.9	0.655	0.928	0.801	0.928	0.839	0.9684	0.240399	0.903	0.152	0.866	0.152	0.895	0.152	0.917	0.152	0.929	0.152	0.74	0.75	0.23	0.15	0.01	0.04	0.43	0.45	0.19	0.2
Act5C	1005796494	26	brk	Dict	0.5477				0.23	0.77	0.25	0.5	0.11	0.919	0.718	0.886	0.323	0.914	0.651	0.937	0.802	0.946	0.885	2.1159	0.385927	0.925	0.152	0.883	0.152	0.916	0.152	0.939	0.152	0.957	0.152	0.69	0.71	0.37	0.36	0.24	0.17	0.03	0.08	0.36	0.33
Act5C	1005796494	26	bx	Dict	0.5722				0.2	0.83	0.2	0.29	0.05	0.899	0.714	0.867	0.309	0.895	0.651	0.907	0.792	0.914	0.858	1.1999	0.385927	0.901	0.152	0.863	0.152	0.894	0.152	0.918	0.152	0.934	0.152	0.79	0.8	0.29	0.26	0.25	0.22	0.02	0.06	0.34	0.32
Act5C	1005796494	26	dgo	Dict	0.5774				0.31	0.6	0.04	0.22	0.16	0.815	0.614	0.762	0.276	0.801	0.553	0.832	0.684	0.856	0.801	0.4284	0.385927	0.789	0.152	0.742	0.152	0.777	0.152	0.819	0.152	0.84	0.152	0.66	0.61	0.24	0.26	0.17	0.23	0.22	0.26	0.23	0.21
Act5C	1005796494	26	dll	Dict	0.7059		*		0.22	0.84	0.07	0.09	0.13	0.893	0.691	0.855	0.319	0.882	0.626	0.902	0.775	0.916	0.881	0.8412	0.385927	0.894	0.152	0.854	0.152	0.885	0.152	0.911	0.152	0.924	0.152	0.68	0.66	0.07	0.15	0.59	0.59	0.03	0.11	0.06	0.04
Act5C	1005796494	26	ds	Dict	0.7152				0.39	0.84	0.12	0.23	0.09	0.937	0.759	0.903	0.356	0.929	0.684	0.943	0.852	0.947	0.903	5.7655	0.385927	0.932	0.152	0.898	0.152	0.925	0.152	0.944	0.152	0.956	0.152	0.89	0.85	0.21	0.26	0.14	0.21	0.26	0.31	0.22	0.21
Act5C	1005796494	26	ex	Dict	0.5708				0.04	0.82	0.43	0.12	0.04	0.914	0.73	0.883	0.322	0.91	0.661	0.92	0.832	0.947	0.875	5.4462	0.385927	0.918	0.152	0.88	0.152	0.909	0.152	0.929	0.152	0.944	0.152	0.82	0.81	0.21	0.17	0.21	0.15	0.42	0.47	0.01	0.01
Act5C	1005796494	26	ft	Dict	0.731		*		0.39	0.75	0.08	0.35	0.1	0.927	0.72	0.889	0.323	0.919	0.649	0.933	0.808	0.941	0.888	4.3023	0.385927	0.916	0.152	0.877	0.152	0.907	0.152	0.938	0.152	0.95	0.152	0.77	0.7	0.42	0.43	0.25	0.36	0.22	0.28	0.21	0.2
Act5C	1005796494	26	fz	Dict	0.5852				0.06	0.7	0.17	0.26	0.24	0.85	0.643	0.804	0.281	0.839	0.574	0.861	0.74	0.866	0.798	0.4509	0.385927	0.841	0.152	0.79	0.152	0.826	0.152	0.861	0.152	0.882	0.152	0.77	0.78	0.15	0.08	0.06	0.08	0.02	0.03	0.39	0.4
Act5C	1005796494	26	luna	Dict	0.6371				0.18	0.75	0.2	0.38	0.08	0.869	0.647	0.82	0.292	0.86	0.599	0.88	0.733	0.882	0.805	0.3695	0.385927	0.861	0.152	0.819	0.152	0.852	0.152	0.879	0.152	0.903	0.152	0.62	0.62	0.08	0.12	0.38	0.41	0.28	0.2	0.3	0.25
Act5C	1005796494	26	mats	Dict	0.714		*		0.58	0.58	0.2	0.15	0.19	0.892	0.685	0.853	0.318	0.882	0.628	0.899	0.766	0.9	0.866	3.5887	0.385927	0.884	0.152	0.843	0.152	0.875	0.152	0.897	0.152	0.918	0.152	0.72	0.65	0.54	0.62	0.07	0.12	0.01	0.04	0.07	0.04
Act5C	1005796494	26	med	Dict	0.6485		*		0.17	0.63	0.24	0.37	0.19	0.855	0.625	0.8	0.281	0.843	0.558	0.875	0.718	0.896	0.847	0.768	0.385927	0.84	0.152	0.789	0.152	0.828	0.152	0.862	0.152	0.893	0.152	0.54	0.51	0.21	0.19	0.24	0.32	0.14	0.06	0.15	0.1
Act5C	1005796494	26	mpk2	Dict	0.5844				0.18	0.68	0.09	0.37	0.15	0.846	0.633	0.806	0.278	0.839	0.57	0.862	0.742	0.889	0.829	0.4463	0.385927	0.849	0.152	0.797	0.152	0.837	0.152	0.878	0.152	0.903	0.152	0.61	0.59	0.05	0.06	0.23	0.26	0.05	0.09	0.59	0.58
Act5C	1005796494	26	nmo	Dict	0.6196				0.31	0.81	0.35	0.29	0.15	0.94	0.734	0.907	0.346	0.934	0.656	0.96	0.831	0.961	0.909	2.0873	0.385927	0.938	0.152	0.902	0.152	0.931	0.152	0.953	0.152	0.963	0.152	0.92	0.92	0.07	0.06	0.16	0.13	0.17	0.2	0.2	0.2
Act5C	1005796494	26	s6k	Dict	0.5034				0.41	0.16	0.42	0.15	0.43	0.797	0.575	0.75	0.247	0.785	0.514	0.818	0.673	0.836	0.777	0.3905	0.385927	0.79	0.152	0.728	0.152	0.774	0.152	0.814	0.152	0.852	0.152	0.22	0.16	0.48	0.46	0.17	0.29	0.14	0.09	0.47	0.48
Act5C	1005796494	26	sav	Dict	0.5484				0.34	0.81	0.01	0.18	0.13	0.914	0.732	0.873	0.328	0.904	0.656	0.928	0.795	0.931	0.931	0.5947	0.385927	0.909	0.152	0.868	0.152	0.902	0.152	0.929	0.152	0.952	0.152	0.58	0.56	0.05	0.15	0.59	0.59	0.16	0.23	0.3	0.28
Act5C	1005796494	26	sd	Dict	0.7917		**		0.34	0.63	0.37	0.24	0.02	0.856	0.667	0.823	0.286	0.851	0.597	0.87	0.767	0.871	0.849	5.3633	0.385927	0.87	0.152	0.824	0.152	0.861	0.152	0.885	0.152	0.905	0.152	0.7	0.64	0.42	0.45	0.08	0.25	0.3	0.25	0.11	0.09
Act5C	1005796494	26	ser	Dict	0.768		*		0.11	0.78	0.3	0.27	0.16	0.893	0.688	0.842	0.31	0.879	0.621	0.905	0.793	0.918	0.869	0.4217	0.385927	0.876	0.152	0.833	0.152	0.868	0.152	0.891	0.152	0.919	0.152	0.69	0.66	0.2	0.16	0.36	0.45	0.2	0.11	0.1	0.06
Act5C	1005796494	26	tmod	Dict	0.6186		*		0.2	0.49	0.1	0.6	0.13	0.821	0.592	0.765	0.243	0.814	0.518	0.84	0.668	0.868	0.753	0.6584	0.385927	0.822	0.152	0.761	0.152	0.81	0.152	0.852	0.152	0.876	0.152	0.57	0.56	0.02	0.09	0.05	0.01	0.01	0.04	0.36	0.34
Act5C	1005796494	26	ubx	Dict	0.6965				0.45	0.7	0.38	0.06	0.15	0.916	0.737	0.881	0.325	0.908	0.669	0.924	0.823	0.952	0.891	0.6049	0.385927	0.91	0.152	0.876	0.152	0.902	0.152	0.929	0.152	0.943	0.152	0.74	0.7	0.38	0.42	0.12	0.27	0.29	0.22	0.23	0.25
Act5C	1005796494	26	vn	Dict	0.5317		*		0.07	0.55	0.02	0.2	0.09	0.774	0.525	0.715	0.229	0.762	0.472	0.814	0.609	0.817	0.672	1.2207	0.385927	0.762	0.152	0.696	0.152	0.746	0.152	0.799	0.152	0.855	0.152	0.46	0.41	0.22	0.15	0.38	0.43	0.37	0.4	0.27	0.29
Act5C	1005796494	26	wg	Dict	0.5455				0.35	0.58	0.01	0.12	0.19	0.778	0.575	0.724	0.25	0.762	0.522	0.796	0.661	0.804	0.737	1.6659	0.385927	0.776	0.152	0.726	0.152	0.764	0.152	0.798	0.152	0.846	0.152	0.62	0.59	0.24	0.31	0.06	0.04	0.13	0.15	0.18	0.17
Act5C	1005796494	26	wts	Dict	0.5331				0.36	0.69	0.38	0.08	0.22	0.894	0.718	0.857	0.324	0.886	0.645	0.917	0.809	0.926	0.882	0.9344	0.385927	0.887	0.152	0.845	0.152	0.877	0.152	0.901	0.152	0.918	0.152	0.79	0.77	0.09	0.2	0.16	0.12	0.41	0.42	0.22	0.24
Adk1	3112195536	637	ap	Dict	0.5077				0.13	0.81	0.11	0.15	0.22	0.856	0.666	0.815	0.299	0.847	0.607	0.87	0.745	0.871	0.826	0.394	0.29917	0.86	0.152	0.82	0.152	0.852	0.152	0.875	0.152	0.892	0.152	0.74	0.76	0.27	0.23	0.17	0.16	0.1	0.06	0.21	0.18
Adk1	3112195536	637	dgo	Dict	0.6507		*		0.31	0.6	0.04	0.22	0.16	0.815	0.614	0.762	0.276	0.801	0.553	0.832	0.684	0.856	0.801	0.4284	0.29917	0.789	0.152	0.742	0.152	0.777	0.152	0.819	0.152	0.84	0.152	0.66	0.61	0.24	0.26	0.17	0.23	0.22	0.26	0.23	0.21
Adk1	3112195536	637	dll	Dict	0.5018				0.22	0.84	0.07	0.09	0.13	0.893	0.691	0.855	0.319	0.882	0.626	0.902	0.775	0.916	0.881	0.8412	0.29917	0.894	0.152	0.854	0.152	0.885	0.152	0.911	0.152	0.924	0.152	0.68	0.66	0.07	0.15	0.59	0.59	0.03	0.11	0.06	0.04
Adk1	3112195536	637	ds	Dict	0.8962		**		0.39	0.84	0.12	0.23	0.09	0.937	0.759	0.903	0.356	0.929	0.684	0.943	0.852	0.947	0.903	5.7655	0.29917	0.932	0.152	0.898	0.152	0.925	0.152	0.944	0.152	0.956	0.152	0.89	0.85	0.21	0.26	0.14	0.21	0.26	0.31	0.22	0.21
Adk1	3112195536	637	dsh	Dict	0.7717		*		0.68	0.51	0.24	0.14	0.1	0.91	0.72	0.873	0.33	0.9	0.649	0.92	0.793	0.934	0.84	1.1394	0.29917	0.91	0.152	0.871	0.152	0.9	0.152	0.923	0.152	0.937	0.152	0.68	0.66	0.19	0.35	0.33	0.27	0.26	0.26	0.32	0.3
Adk1	3112195536	637	ex	Dict	0.764		*		0.04	0.82	0.43	0.12	0.04	0.914	0.73	0.883	0.322	0.91	0.661	0.92	0.832	0.947	0.875	5.4462	0.29917	0.918	0.152	0.88	0.152	0.909	0.152	0.929	0.152	0.944	0.152	0.82	0.81	0.21	0.17	0.21	0.15	0.42	0.47	0.01	0.01
Adk1	3112195536	637	fj	Dict	0.7585				0.84	0.35	0.16	0.16	0.06	0.938	0.763	0.909	0.355	0.932	0.705	0.952	0.857	0.956	0.929	2.0627	0.29917	0.928	0.152	0.894	0.152	0.921	0.152	0.941	0.152	0.953	0.152	0.59	0.54	0.46	0.61	0.39	0.27	0.29	0.29	0.37	0.34
Adk1	3112195536	637	ft	Dict	0.8376		**		0.39	0.75	0.08	0.35	0.1	0.927	0.72	0.889	0.323	0.919	0.649	0.933	0.808	0.941	0.888	4.3023	0.29917	0.916	0.152	0.877	0.152	0.907	0.152	0.938	0.152	0.95	0.152	0.77	0.7	0.42	0.43	0.25	0.36	0.22	0.28	0.21	0.2
Adk1	3112195536	637	fz	Dict	0.5477				0.06	0.7	0.17	0.26	0.24	0.85	0.643	0.804	0.281	0.839	0.574	0.861	0.74	0.866	0.798	0.4509	0.29917	0.841	0.152	0.79	0.152	0.826	0.152	0.861	0.152	0.882	0.152	0.77	0.78	0.15	0.08	0.06	0.08	0.02	0.03	0.39	0.4
Adk1	3112195536	637	inv	Dict	0.5329				0.21	0.21	0.49	0.43	0.37	0.794	0.541	0.743	0.234	0.786	0.48	0.811	0.656	0.863	0.766	0.3255	0.29917	0.798	0.152	0.739	0.152	0.786	0.152	0.826	0.152	0.867	0.152	0.3	0.27	0.03	0.1	0.19	0.2	0.61	0.57	0.04	0.1
Adk1	3112195536	637	mats	Dict	0.77		**		0.58	0.58	0.2	0.15	0.19	0.892	0.685	0.853	0.318	0.882	0.628	0.899	0.766	0.9	0.866	3.5887	0.29917	0.884	0.152	0.843	0.152	0.875	0.152	0.897	0.152	0.918	0.152	0.72	0.65	0.54	0.62	0.07	0.12	0.01	0.04	0.07	0.04
Adk1	3112195536	637	nmo	Dict	0.7805		*		0.31	0.81	0.35	0.29	0.15	0.94	0.734	0.907	0.346	0.934	0.656	0.96	0.831	0.961	0.909	2.0873	0.29917	0.938	0.152	0.902	0.152	0.931	0.152	0.953	0.152	0.963	0.152	0.92	0.92	0.07	0.06	0.16	0.13	0.17	0.2	0.2	0.2
Adk1	3112195536	637	ptc	Dict	0.5361				0.6	0.19	0.19	0.05	0.47	0.847	0.608	0.783	0.28	0.832	0.556	0.855	0.7	0.862	0.784	1.9546	0.29917	0.831	0.152	0.769	0.152	0.813	0.152	0.863	0.152	0.884	0.152	0.46	0.46	0.19	0.39	0.58	0.48	0.06	0.01	0.05	0.01
Adk1	3112195536	637	sav	Dict	0.516				0.34	0.81	0.01	0.18	0.13	0.914	0.732	0.873	0.328	0.904	0.656	0.928	0.795	0.931	0.931	0.5947	0.29917	0.909	0.152	0.868	0.152	0.902	0.152	0.929	0.152	0.952	0.152	0.58	0.56	0.05	0.15	0.59	0.59	0.16	0.23	0.3	0.28
Adk1	3112195536	637	sd	Dict	0.5244				0.34	0.63	0.37	0.24	0.02	0.856	0.667	0.823	0.286	0.851	0.597	0.87	0.767	0.871	0.849	5.3633	0.29917	0.87	0.152	0.824	0.152	0.861	0.152	0.885	0.152	0.905	0.152	0.7	0.64	0.42	0.45	0.08	0.25	0.3	0.25	0.11	0.09
Adk1	3112195536	637	stan	Dict	0.6481		*		0.2	0.44	0.52	0.16	0.03	0.797	0.577	0.744	0.261	0.787	0.515	0.815	0.663	0.834	0.797	0.2999	0.29917	0.795	0.152	0.741	0.152	0.785	0.152	0.827	0.152	0.875	0.152	0.48	0.46	0.11	0.04	0.08	0.12	0.49	0.5	0.04	0.02
Adk1	3112195536	637	stg	Dict	0.7262		*		0.25	0.54	0.35	0.48	0.09	0.864	0.657	0.816	0.263	0.854	0.585	0.882	0.756	0.884	0.858	1.0297	0.29917	0.866	0.152	0.81	0.152	0.852	0.152	0.889	0.152	0.914	0.152	0.63	0.59	0.01	0.07	0.07	0.06	0.41	0.44	0.37	0.33
Adk1	3112195536	637	tx	Dict	0.7063				0.06	0.74	0.53	0.01	0.18	0.914	0.73	0.868	0.33	0.9	0.655	0.928	0.801	0.928	0.839	0.9684	0.29917	0.903	0.152	0.866	0.152	0.895	0.152	0.917	0.152	0.929	0.152	0.74	0.75	0.23	0.15	0.01	0.04	0.43	0.45	0.19	0.2
Adk1	3112195536	637	ubx	Dict	0.6016				0.45	0.7	0.38	0.06	0.15	0.916	0.737	0.881	0.325	0.908	0.669	0.924	0.823	0.952	0.891	0.6049	0.29917	0.91	0.152	0.876	0.152	0.902	0.152	0.929	0.152	0.943	0.152	0.74	0.7	0.38	0.42	0.12	0.27	0.29	0.22	0.23	0.25
Adk1	3112195536	637	wg	Dict	0.6029		*		0.35	0.58	0.01	0.12	0.19	0.778	0.575	0.724	0.25	0.762	0.522	0.796	0.661	0.804	0.737	1.6659	0.29917	0.776	0.152	0.726	0.152	0.764	0.152	0.798	0.152	0.846	0.152	0.62	0.59	0.24	0.31	0.06	0.04	0.13	0.15	0.18	0.17
Adk1	3112195536	637	wts	Dict	0.7868		*		0.36	0.69	0.38	0.08	0.22	0.894	0.718	0.857	0.324	0.886	0.645	0.917	0.809	0.926	0.882	0.9344	0.29917	0.887	0.152	0.845	0.152	0.877	0.152	0.901	0.152	0.918	0.152	0.79	0.77	0.09	0.2	0.16	0.12	0.41	0.42	0.22	0.24
AlstR	1003475536	12	dco	Dict	0.5576		*		0.23	0.23	0.11	0.84	0.13	0.829	0.53	0.77	0.204	0.815	0.449	0.846	0.65	0.848	0.815	0.6512	0.0733474	0.845	0.152	0.775	0.152	0.828	0.152	0.872	0.152	0.891	0.152	0.18	0.13	0.33	0.29	0.18	0.25	0.24	0.26	0.44	0.41
AlstR	1003475536	12	ds	Dict	0.5539				0.39	0.84	0.12	0.23	0.09	0.937	0.759	0.903	0.356	0.929	0.684	0.943	0.852	0.947	0.903	5.7655	0.0733474	0.932	0.152	0.898	0.152	0.925	0.152	0.944	0.152	0.956	0.152	0.89	0.85	0.21	0.26	0.14	0.21	0.26	0.31	0.22	0.21
AlstR	1003475536	12	fj	Dict	0.5162				0.84	0.35	0.16	0.16	0.06	0.938	0.763	0.909	0.355	0.932	0.705	0.952	0.857	0.956	0.929	2.0627	0.0733474	0.928	0.152	0.894	0.152	0.921	0.152	0.941	0.152	0.953	0.152	0.59	0.54	0.46	0.61	0.39	0.27	0.29	0.29	0.37	0.34
AlstR	1003475536	12	ft	Dict	0.6109				0.39	0.75	0.08	0.35	0.1	0.927	0.72	0.889	0.323	0.919	0.649	0.933	0.808	0.941	0.888	4.3023	0.0733474	0.916	0.152	0.877	0.152	0.907	0.152	0.938	0.152	0.95	0.152	0.77	0.7	0.42	0.43	0.25	0.36	0.22	0.28	0.21	0.2
AlstR	1003475536	12	stg	Dict	0.6491				0.25	0.54	0.35	0.48	0.09	0.864	0.657	0.816	0.263	0.854	0.585	0.882	0.756	0.884	0.858	1.0297	0.0733474	0.866	0.152	0.81	0.152	0.852	0.152	0.889	0.152	0.914	0.152	0.63	0.59	0.01	0.07	0.07	0.06	0.41	0.44	0.37	0.33
Aps	3110891945	619	aret	Dict	0.604				0.66	0.06	0.37	0.12	0	0.844	0.652	0.797	0.293	0.836	0.595	0.861	0.737	0.868	0.861	0.4688	0.0694734	0.843	0.152	0.795	0.152	0.833	0.152	0.863	0.152	0.885	0.152	0.22	0.23	0.02	0.18	0.65	0.65	0.14	0.1	0.52	0.5
Aps	3110910269	621	dad	Dict	0.5023				0.6	0.35	0.36	0.11	0.33	0.869	0.651	0.825	0.301	0.858	0.591	0.884	0.743	0.901	0.864	0.3276	0.0510092	0.857	0.152	0.812	0.152	0.849	0.152	0.877	0.152	0.897	0.152	0.02	0.03	0.18	0.36	0.74	0.69	0.29	0.21	0.1	0.04
Aps	3110891945	619	ds	Dict	0.6127				0.39	0.84	0.12	0.23	0.09	0.937	0.759	0.903	0.356	0.929	0.684	0.943	0.852	0.947	0.903	5.7655	0.0694734	0.932	0.152	0.898	0.152	0.925	0.152	0.944	0.152	0.956	0.152	0.89	0.85	0.21	0.26	0.14	0.21	0.26	0.31	0.22	0.21
Aps	3110891945	619	dsh	Dict	0.7049				0.68	0.51	0.24	0.14	0.1	0.91	0.72	0.873	0.33	0.9	0.649	0.92	0.793	0.934	0.84	1.1394	0.0694734	0.91	0.152	0.871	0.152	0.9	0.152	0.923	0.152	0.937	0.152	0.68	0.66	0.19	0.35	0.33	0.27	0.26	0.26	0.32	0.3
Aps	3110891945	619	ex	Dict	0.6098				0.04	0.82	0.43	0.12	0.04	0.914	0.73	0.883	0.322	0.91	0.661	0.92	0.832	0.947	0.875	5.4462	0.0694734	0.918	0.152	0.88	0.152	0.909	0.152	0.929	0.152	0.944	0.152	0.82	0.81	0.21	0.17	0.21	0.15	0.42	0.47	0.01	0.01
Aps	3110891945	619	fj	Dict	0.6203				0.84	0.35	0.16	0.16	0.06	0.938	0.763	0.909	0.355	0.932	0.705	0.952	0.857	0.956	0.929	2.0627	0.0694734	0.928	0.152	0.894	0.152	0.921	0.152	0.941	0.152	0.953	0.152	0.59	0.54	0.46	0.61	0.39	0.27	0.29	0.29	0.37	0.34
Aps	3110891945	619	nmo	Dict	0.7548		*		0.31	0.81	0.35	0.29	0.15	0.94	0.734	0.907	0.346	0.934	0.656	0.96	0.831	0.961	0.909	2.0873	0.0694734	0.938	0.152	0.902	0.152	0.931	0.152	0.953	0.152	0.963	0.152	0.92	0.92	0.07	0.06	0.16	0.13	0.17	0.2	0.2	0.2
Aps	3110910269	621	ptc	Dict	0.7232		**		0.6	0.19	0.19	0.05	0.47	0.847	0.608	0.783	0.28	0.832	0.556	0.855	0.7	0.862	0.784	1.9546	0.0510092	0.831	0.152	0.769	0.152	0.813	0.152	0.863	0.152	0.884	0.152	0.46	0.46	0.19	0.39	0.58	0.48	0.06	0.01	0.05	0.01
Aps	3110891945	619	ptc	Dict	0.6374		*		0.6	0.19	0.19	0.05	0.47	0.847	0.608	0.783	0.28	0.832	0.556	0.855	0.7	0.862	0.784	1.9546	0.0694734	0.831	0.152	0.769	0.152	0.813	0.152	0.863	0.152	0.884	0.152	0.46	0.46	0.19	0.39	0.58	0.48	0.06	0.01	0.05	0.01
Aps	3110910269	621	sls	Dict	0.6003				0.72	0.33	0.05	0.14	0.22	0.84	0.68	0.801	0.314	0.832	0.622	0.857	0.744	0.874	0.801	0.5182	0.0510092	0.839	0.152	0.799	0.152	0.832	0.152	0.859	0.152	0.883	0.152	0.03	0.07	0.46	0.61	0.64	0.52	0.12	0.06	0.21	0.16
Aps	3110891945	619	socs36e	Dict	0.6067				0.74	0.08	0.47	0.09	0.11	0.886	0.717	0.854	0.333	0.88	0.654	0.898	0.808	0.901	0.891	0.4292	0.0694734	0.88	0.152	0.846	0.152	0.872	0.152	0.895	0.152	0.911	0.152	0.19	0.17	0.15	0.33	0.64	0.63	0.43	0.39	0.26	0.24
Aps	3110910269	621	tango14	Dict	0.5838				0.87	0.17	0.08	0.09	0.3	0.899	0.736	0.871	0.356	0.894	0.669	0.914	0.821	0.916	0.86	1.4426	0.0510092	0.909	0.152	0.875	0.152	0.902	0.152	0.923	0.152	0.932	0.152	0.16	0.13	0.48	0.67	0.77	0.62	0.08	0.02	0.09	0.05
Aps	3110910269	621	trh	Dict	0.6909		**		0.53	0.15	0.11	0.12	0.43	0.775	0.527	0.711	0.231	0.758	0.467	0.81	0.62	0.815	0.708	0.8179	0.0510092	0.778	0.152	0.714	0.152	0.764	0.152	0.808	0.152	0.854	0.152	0.09	0.08	0.37	0.52	0.61	0.45	0.21	0.27	0.06	0.09
Aps	3110891945	619	tx	Dict	0.6095				0.06	0.74	0.53	0.01	0.18	0.914	0.73	0.868	0.33	0.9	0.655	0.928	0.801	0.928	0.839	0.9684	0.0694734	0.903	0.152	0.866	0.152	0.895	0.152	0.917	0.152	0.929	0.152	0.74	0.75	0.23	0.15	0.01	0.04	0.43	0.45	0.19	0.2
Aps	3110910269	621	vang	Dict	0.5189		*		0.2	0.01	0.23	0.3	0.66	0.779	0.47	0.703	0.168	0.763	0.403	0.809	0.59	0.814	0.721	0.3247	0.0510092	0.763	0.152	0.688	0.152	0.745	0.152	0.799	0.152	0.832	0.152	0.18	0.18	0.04	0.15	0.4	0.36	0.18	0.1	0.11	0.17
Aps	3110891945	619	wg	Dict	0.5014				0.35	0.58	0.01	0.12	0.19	0.778	0.575	0.724	0.25	0.762	0.522	0.796	0.661	0.804	0.737	1.6659	0.0694734	0.776	0.152	0.726	0.152	0.764	0.152	0.798	0.152	0.846	0.152	0.62	0.59	0.24	0.31	0.06	0.04	0.13	0.15	0.18	0.17
Aps	3110891945	619	wts	Dict	0.7021				0.36	0.69	0.38	0.08	0.22	0.894	0.718	0.857	0.324	0.886	0.645	0.917	0.809	0.926	0.882	0.9344	0.0694734	0.887	0.152	0.845	0.152	0.877	0.152	0.901	0.152	0.918	0.152	0.79	0.77	0.09	0.2	0.16	0.12	0.41	0.42	0.22	0.24
Argk	3109049660	592	brk	Dict	0.5521				0.23	0.77	0.25	0.5	0.11	0.919	0.718	0.886	0.323	0.914	0.651	0.937	0.802	0.946	0.885	2.1159	0.046075	0.925	0.152	0.883	0.152	0.916	0.152	0.939	0.152	0.957	0.152	0.69	0.71	0.37	0.36	0.24	0.17	0.03	0.08	0.36	0.33
Argk	3109049660	592	bx	Dict	0.5239				0.2	0.83	0.2	0.29	0.05	0.899	0.714	0.867	0.309	0.895	0.651	0.907	0.792	0.914	0.858	1.1999	0.046075	0.901	0.152	0.863	0.152	0.894	0.152	0.918	0.152	0.934	0.152	0.79	0.8	0.29	0.26	0.25	0.22	0.02	0.06	0.34	0.32
Argk	3109049660	592	cg4267	Dict	0.5665				0.34	0.23	0.51	0.34	0.33	0.814	0.59	0.77	0.242	0.807	0.53	0.854	0.675	0.854	0.806	0.4521	0.046075	0.81	0.152	0.754	0.152	0.798	0.152	0.83	0.152	0.853	0.152	0.19	0.23	0.4	0.37	0.06	0.15	0.31	0.28	0.66	0.66
Argk	3109049660	592	dally	Dict	0.5563				0.64	0.29	0.47	0.31	0.12	0.906	0.705	0.866	0.306	0.895	0.649	0.919	0.783	0.941	0.845	0.8955	0.046075	0.912	0.152	0.867	0.152	0.901	0.152	0.928	0.152	0.935	0.152	0.18	0.23	0.62	0.64	0.21	0.06	0.18	0.18	0.57	0.56
Argk	3109049660	592	dco	Dict	0.5547		*		0.23	0.23	0.11	0.84	0.13	0.829	0.53	0.77	0.204	0.815	0.449	0.846	0.65	0.848	0.815	0.6512	0.046075	0.845	0.152	0.775	0.152	0.828	0.152	0.872	0.152	0.891	0.152	0.18	0.13	0.33	0.29	0.18	0.25	0.24	0.26	0.44	0.41
Argk	3109049660	592	fz	Dict	0.5116				0.06	0.7	0.17	0.26	0.24	0.85	0.643	0.804	0.281	0.839	0.574	0.861	0.74	0.866	0.798	0.4509	0.046075	0.841	0.152	0.79	0.152	0.826	0.152	0.861	0.152	0.882	0.152	0.77	0.78	0.15	0.08	0.06	0.08	0.02	0.03	0.39	0.4
Argk	3109049660	592	tmod	Dict	0.554				0.2	0.49	0.1	0.6	0.13	0.821	0.592	0.765	0.243	0.814	0.518	0.84	0.668	0.868	0.753	0.6584	0.046075	0.822	0.152	0.761	0.152	0.81	0.152	0.852	0.152	0.876	0.152	0.57	0.56	0.02	0.09	0.05	0.01	0.01	0.04	0.36	0.34
Awh	3103872278	519	aret	Dict	0.6399				0.66	0.06	0.37	0.12	0	0.844	0.652	0.797	0.293	0.836	0.595	0.861	0.737	0.868	0.861	0.4688	0.5056	0.843	0.152	0.795	0.152	0.833	0.152	0.863	0.152	0.885	0.152	0.22	0.23	0.02	0.18	0.65	0.65	0.14	0.1	0.52	0.5
Awh	3103872278	519	bsk	Dict	0.5189				0.12	0.05	0.62	0.23	0.07	0.742	0.522	0.689	0.218	0.733	0.458	0.75	0.61	0.791	0.715	0.6289	0.5056	0.771	0.152	0.715	0.152	0.759	0.152	0.802	0.152	0.862	0.152	0.22	0.28	0.54	0.4	0.36	0.51	0.22	0.19	0.51	0.49
Awh	3103872278	519	cg8654	Dict	0.5268				0.63	0.1	0.2	0.08	0.1	0.738	0.574	0.696	0.263	0.73	0.517	0.775	0.637	0.797	0.705	0.4142	0.5056	0.749	0.152	0.7	0.152	0.738	0.152	0.77	0.152	0.818	0.152	0.14	0.12	0.15	0.3	0.49	0.46	0.09	0.08	0.45	0.44
Awh	3103872278	519	dad	Dict	0.5306				0.6	0.35	0.36	0.11	0.33	0.869	0.651	0.825	0.301	0.858	0.591	0.884	0.743	0.901	0.864	0.3276	0.5056	0.857	0.152	0.812	0.152	0.849	0.152	0.877	0.152	0.897	0.152	0.02	0.03	0.18	0.36	0.74	0.69	0.29	0.21	0.1	0.04
Awh	3103872278	519	ds	Dict	0.5428				0.39	0.84	0.12	0.23	0.09	0.937	0.759	0.903	0.356	0.929	0.684	0.943	0.852	0.947	0.903	5.7655	0.5056	0.932	0.152	0.898	0.152	0.925	0.152	0.944	0.152	0.956	0.152	0.89	0.85	0.21	0.26	0.14	0.21	0.26	0.31	0.22	0.21
Awh	3103872278	519	dsh	Dict	0.5932				0.68	0.51	0.24	0.14	0.1	0.91	0.72	0.873	0.33	0.9	0.649	0.92	0.793	0.934	0.84	1.1394	0.5056	0.91	0.152	0.871	0.152	0.9	0.152	0.923	0.152	0.937	0.152	0.68	0.66	0.19	0.35	0.33	0.27	0.26	0.26	0.32	0.3
Awh	3103872278	519	ex	Dict	0.5643				0.04	0.82	0.43	0.12	0.04	0.914	0.73	0.883	0.322	0.91	0.661	0.92	0.832	0.947	0.875	5.4462	0.5056	0.918	0.152	0.88	0.152	0.909	0.152	0.929	0.152	0.944	0.152	0.82	0.81	0.21	0.17	0.21	0.15	0.42	0.47	0.01	0.01
Awh	3103872278	519	fj	Dict	0.6525				0.84	0.35	0.16	0.16	0.06	0.938	0.763	0.909	0.355	0.932	0.705	0.952	0.857	0.956	0.929	2.0627	0.5056	0.928	0.152	0.894	0.152	0.921	0.152	0.941	0.152	0.953	0.152	0.59	0.54	0.46	0.61	0.39	0.27	0.29	0.29	0.37	0.34
Awh	3103872278	519	mad	Dict	0.5825				0.84	0.08	0.2	0.2	0.07	0.894	0.724	0.866	0.359	0.887	0.661	0.91	0.811	0.922	0.847	0.5446	0.5056	0.889	0.152	0.854	0.152	0.881	0.152	0.901	0.152	0.907	0.152	0.2	0.16	0.38	0.54	0.57	0.49	0.28	0.25	0.5	0.46
Awh	3103872278	519	nmo	Dict	0.5243				0.31	0.81	0.35	0.29	0.15	0.94	0.734	0.907	0.346	0.934	0.656	0.96	0.831	0.961	0.909	2.0873	0.5056	0.938	0.152	0.902	0.152	0.931	0.152	0.953	0.152	0.963	0.152	0.92	0.92	0.07	0.06	0.16	0.13	0.17	0.2	0.2	0.2
Awh	3103872278	519	os	Dict	0.7447		**		0.36	0.12	0.65	0.28	0	0.816	0.603	0.775	0.255	0.808	0.547	0.844	0.699	0.858	0.789	0.2858	0.5056	0.823	0.152	0.777	0.152	0.814	0.152	0.838	0.152	0.855	0.152	0.09	0.09	0.09	0.04	0.44	0.5	0.58	0.54	0.23	0.18
Awh	3103872278	519	rpt1	Dict	0.5244				0.04	0.25	0.66	0.15	0.07	0.793	0.555	0.721	0.245	0.77	0.503	0.816	0.623	0.817	0.725	0.264	0.5056	0.775	0.152	0.72	0.152	0.763	0.152	0.791	0.152	0.839	0.152	0.12	0.08	0.45	0.35	0.32	0.47	0.36	0.32	0.25	0.23
Awh	3103872278	519	socs36e	Dict	0.706				0.74	0.08	0.47	0.09	0.11	0.886	0.717	0.854	0.333	0.88	0.654	0.898	0.808	0.901	0.891	0.4292	0.5056	0.88	0.152	0.846	0.152	0.872	0.152	0.895	0.152	0.911	0.152	0.19	0.17	0.15	0.33	0.64	0.63	0.43	0.39	0.26	0.24
Awh	3103872278	519	stan	Dict	0.5604				0.2	0.44	0.52	0.16	0.03	0.797	0.577	0.744	0.261	0.787	0.515	0.815	0.663	0.834	0.797	0.2999	0.5056	0.795	0.152	0.741	0.152	0.785	0.152	0.827	0.152	0.875	0.152	0.48	0.46	0.11	0.04	0.08	0.12	0.49	0.5	0.04	0.02
Awh	3103872278	519	stg	Dict	0.5699				0.25	0.54	0.35	0.48	0.09	0.864	0.657	0.816	0.263	0.854	0.585	0.882	0.756	0.884	0.858	1.0297	0.5056	0.866	0.152	0.81	0.152	0.852	0.152	0.889	0.152	0.914	0.152	0.63	0.59	0.01	0.07	0.07	0.06	0.41	0.44	0.37	0.33
Awh	3103872278	519	wts	Dict	0.5689				0.36	0.69	0.38	0.08	0.22	0.894	0.718	0.857	0.324	0.886	0.645	0.917	0.809	0.926	0.882	0.9344	0.5056	0.887	0.152	0.845	0.152	0.877	0.152	0.901	0.152	0.918	0.152	0.79	0.77	0.09	0.2	0.16	0.12	0.41	0.42	0.22	0.24
Brd	3114966659	668	brk	Dict	0.5157				0.23	0.77	0.25	0.5	0.11	0.919	0.718	0.886	0.323	0.914	0.651	0.937	0.802	0.946	0.885	2.1159	0.0315382	0.925	0.152	0.883	0.152	0.916	0.152	0.939	0.152	0.957	0.152	0.69	0.71	0.37	0.36	0.24	0.17	0.03	0.08	0.36	0.33
Brd	3114966659	668	chn	Dict	0.5803				0.57	0.17	0.13	0.45	0.34	0.826	0.601	0.773	0.271	0.817	0.544	0.858	0.702	0.881	0.766	0.9439	0.0315382	0.824	0.152	0.768	0.152	0.81	0.152	0.847	0.152	0.865	0.152	0.02	0.02	0.44	0.53	0.4	0.27	0.03	0.06	0.35	0.31
Brd	3114966659	668	dco	Dict	0.6495		*		0.23	0.23	0.11	0.84	0.13	0.829	0.53	0.77	0.204	0.815	0.449	0.846	0.65	0.848	0.815	0.6512	0.0315382	0.845	0.152	0.775	0.152	0.828	0.152	0.872	0.152	0.891	0.152	0.18	0.13	0.33	0.29	0.18	0.25	0.24	0.26	0.44	0.41
Brd	3114966659	668	luna	Dict	0.5371				0.18	0.75	0.2	0.38	0.08	0.869	0.647	0.82	0.292	0.86	0.599	0.88	0.733	0.882	0.805	0.3695	0.0315382	0.861	0.152	0.819	0.152	0.852	0.152	0.879	0.152	0.903	0.152	0.62	0.62	0.08	0.12	0.38	0.41	0.28	0.2	0.3	0.25
Brd	3114966659	668	med	Dict	0.5122				0.17	0.63	0.24	0.37	0.19	0.855	0.625	0.8	0.281	0.843	0.558	0.875	0.718	0.896	0.847	0.768	0.0315382	0.84	0.152	0.789	0.152	0.828	0.152	0.862	0.152	0.893	0.152	0.54	0.51	0.21	0.19	0.24	0.32	0.14	0.06	0.15	0.1
Brd	3114966659	668	pnt	Dict	0.5505				0.28	0.69	0.03	0.39	0.09	0.858	0.653	0.816	0.281	0.853	0.584	0.873	0.772	0.886	0.829	0.9325	0.0315382	0.843	0.152	0.802	0.152	0.836	0.152	0.865	0.152	0.891	0.152	0.52	0.53	0.21	0.26	0.4	0.37	0.11	0.04	0.34	0.29
Brd	3114966659	668	tmod	Dict	0.6136		*		0.2	0.49	0.1	0.6	0.13	0.821	0.592	0.765	0.243	0.814	0.518	0.84	0.668	0.868	0.753	0.6584	0.0315382	0.822	0.152	0.761	0.152	0.81	0.152	0.852	0.152	0.876	0.152	0.57	0.56	0.02	0.09	0.05	0.01	0.01	0.04	0.36	0.34
Brd	3114966659	668	vang	Dict	0.5353		*		0.2	0.01	0.23	0.3	0.66	0.779	0.47	0.703	0.168	0.763	0.403	0.809	0.59	0.814	0.721	0.3247	0.0315382	0.763	0.152	0.688	0.152	0.745	0.152	0.799	0.152	0.832	0.152	0.18	0.18	0.04	0.15	0.4	0.36	0.18	0.1	0.11	0.17
Bx	1018441698	99	dco	Dict	0.5025				0.23	0.23	0.11	0.84	0.13	0.829	0.53	0.77	0.204	0.815	0.449	0.846	0.65	0.848	0.815	0.6512	0.659445	0.845	0.152	0.775	0.152	0.828	0.152	0.872	0.152	0.891	0.152	0.18	0.13	0.33	0.29	0.18	0.25	0.24	0.26	0.44	0.41
Bx	1018441698	99	dgo	Dict	0.5694				0.31	0.6	0.04	0.22	0.16	0.815	0.614	0.762	0.276	0.801	0.553	0.832	0.684	0.856	0.801	0.4284	0.659445	0.789	0.152	0.742	0.152	0.777	0.152	0.819	0.152	0.84	0.152	0.66	0.61	0.24	0.26	0.17	0.23	0.22	0.26	0.23	0.21
Bx	1018441698	99	dll	Dict	0.5028				0.22	0.84	0.07	0.09	0.13	0.893	0.691	0.855	0.319	0.882	0.626	0.902	0.775	0.916	0.881	0.8412	0.659445	0.894	0.152	0.854	0.152	0.885	0.152	0.911	0.152	0.924	0.152	0.68	0.66	0.07	0.15	0.59	0.59	0.03	0.11	0.06	0.04
Bx	1018441698	99	ds	Dict	0.6731				0.39	0.84	0.12	0.23	0.09	0.937	0.759	0.903	0.356	0.929	0.684	0.943	0.852	0.947	0.903	5.7655	0.659445	0.932	0.152	0.898	0.152	0.925	0.152	0.944	0.152	0.956	0.152	0.89	0.85	0.21	0.26	0.14	0.21	0.26	0.31	0.22	0.21
Bx	1018441698	99	fj	Dict	0.5379				0.84	0.35	0.16	0.16	0.06	0.938	0.763	0.909	0.355	0.932	0.705	0.952	0.857	0.956	0.929	2.0627	0.659445	0.928	0.152	0.894	0.152	0.921	0.152	0.941	0.152	0.953	0.152	0.59	0.54	0.46	0.61	0.39	0.27	0.29	0.29	0.37	0.34
Bx	1018441698	99	ft	Dict	0.7431		*		0.39	0.75	0.08	0.35	0.1	0.927	0.72	0.889	0.323	0.919	0.649	0.933	0.808	0.941	0.888	4.3023	0.659445	0.916	0.152	0.877	0.152	0.907	0.152	0.938	0.152	0.95	0.152	0.77	0.7	0.42	0.43	0.25	0.36	0.22	0.28	0.21	0.2
Bx	1018441698	99	mats	Dict	0.8387		**		0.58	0.58	0.2	0.15	0.19	0.892	0.685	0.853	0.318	0.882	0.628	0.899	0.766	0.9	0.866	3.5887	0.659445	0.884	0.152	0.843	0.152	0.875	0.152	0.897	0.152	0.918	0.152	0.72	0.65	0.54	0.62	0.07	0.12	0.01	0.04	0.07	0.04
Bx	1018441698	99	sd	Dict	0.7991		**		0.34	0.63	0.37	0.24	0.02	0.856	0.667	0.823	0.286	0.851	0.597	0.87	0.767	0.871	0.849	5.3633	0.659445	0.87	0.152	0.824	0.152	0.861	0.152	0.885	0.152	0.905	0.152	0.7	0.64	0.42	0.45	0.08	0.25	0.3	0.25	0.11	0.09
Bx	1018441698	99	ser	Dict	0.5008				0.11	0.78	0.3	0.27	0.16	0.893	0.688	0.842	0.31	0.879	0.621	0.905	0.793	0.918	0.869	0.4217	0.659445	0.876	0.152	0.833	0.152	0.868	0.152	0.891	0.152	0.919	0.152	0.69	0.66	0.2	0.16	0.36	0.45	0.2	0.11	0.1	0.06
Bx	1018441698	99	ubx	Dict	0.6488				0.45	0.7	0.38	0.06	0.15	0.916	0.737	0.881	0.325	0.908	0.669	0.924	0.823	0.952	0.891	0.6049	0.659445	0.91	0.152	0.876	0.152	0.902	0.152	0.929	0.152	0.943	0.152	0.74	0.7	0.38	0.42	0.12	0.27	0.29	0.22	0.23	0.25
Bx	1018441698	99	wg	Dict	0.5303				0.35	0.58	0.01	0.12	0.19	0.778	0.575	0.724	0.25	0.762	0.522	0.796	0.661	0.804	0.737	1.6659	0.659445	0.776	0.152	0.726	0.152	0.764	0.152	0.798	0.152	0.846	0.152	0.62	0.59	0.24	0.31	0.06	0.04	0.13	0.15	0.18	0.17
Bx	1018441698	99	yki	Dict	0.5041		*		0.25	0.37	0.29	0.38	0.05	0.708	0.492	0.653	0.208	0.693	0.424	0.741	0.58	0.745	0.684	1.8695	0.659445	0.696	0.152	0.646	0.152	0.684	0.152	0.734	0.152	0.761	0.152	0.39	0.36	0.27	0.29	0	0.11	0.27	0.24	0.18	0.15
CAH1	2113805585	226	aret	Dict	0.5365				0.66	0.06	0.37	0.12	0	0.844	0.652	0.797	0.293	0.836	0.595	0.861	0.737	0.868	0.861	0.4688	0.369436	0.843	0.152	0.795	0.152	0.833	0.152	0.863	0.152	0.885	0.152	0.22	0.23	0.02	0.18	0.65	0.65	0.14	0.1	0.52	0.5
CAH1	2113805585	226	cyce	Dict	0.5406				0.06	0.47	0.74	0.25	0.09	0.906	0.718	0.874	0.309	0.899	0.652	0.925	0.798	0.928	0.888	0.9349	0.369436	0.901	0.152	0.857	0.152	0.891	0.152	0.92	0.152	0.936	0.152	0.46	0.5	0.47	0.39	0.06	0.21	0.54	0.55	0.2	0.19
CAH1	2113805585	226	rpt1	Dict	0.6039		*		0.04	0.25	0.66	0.15	0.07	0.793	0.555	0.721	0.245	0.77	0.503	0.816	0.623	0.817	0.725	0.264	0.369436	0.775	0.152	0.72	0.152	0.763	0.152	0.791	0.152	0.839	0.152	0.12	0.08	0.45	0.35	0.32	0.47	0.36	0.32	0.25	0.23
CAH1	2113805585	226	socs36e	Dict	0.6414				0.74	0.08	0.47	0.09	0.11	0.886	0.717	0.854	0.333	0.88	0.654	0.898	0.808	0.901	0.891	0.4292	0.369436	0.88	0.152	0.846	0.152	0.872	0.152	0.895	0.152	0.911	0.152	0.19	0.17	0.15	0.33	0.64	0.63	0.43	0.39	0.26	0.24
CCHa1	3209920196	801	bs	Dict	0.5779		*		0.13	0.12	0.59	0.11	0.19	0.743	0.496	0.681	0.214	0.727	0.45	0.75	0.598	0.783	0.667	0.4761	0.269502	0.731	0.152	0.674	0.152	0.719	0.152	0.753	0.152	0.785	0.152	0.05	0.08	0.32	0.29	0.1	0.22	0.53	0.5	0.19	0.2
CCHa1	3209920196	801	btd	Dict	0.6452				0.83	0.17	0.22	0.01	0.09	0.891	0.703	0.854	0.334	0.882	0.638	0.904	0.803	0.91	0.863	0.5246	0.269502	0.889	0.152	0.851	0.152	0.882	0.152	0.899	0.152	0.921	0.152	0.06	0.02	0.53	0.66	0.51	0.36	0.14	0.16	0.45	0.44
CCHa1	3209920196	801	cg4267	Dict	0.7034		**		0.34	0.23	0.51	0.34	0.33	0.814	0.59	0.77	0.242	0.807	0.53	0.854	0.675	0.854	0.806	0.4521	0.269502	0.81	0.152	0.754	0.152	0.798	0.152	0.83	0.152	0.853	0.152	0.19	0.23	0.4	0.37	0.06	0.15	0.31	0.28	0.66	0.66
CCHa1	3209920196	801	ct	Muta	0.5202				0.54	0.02	0.38	0.03	0.09	0.705	0.538	0.664	0.253	0.701	0.484	0.718	0.607	0.733	0.65	0.0056	0.269502	0.715	0.152	0.672	0.152	0.705	0.152	0.731	0.152	0.766	0.152	0.12	0.08	0.47	0.51	0.18	0.03	0.25	0.22	0.25	0.27
CCHa1	3209920196	801	cv2	Dict	0.6968		*		0.56	0.49	0.08	0.38	0.25	0.87	0.685	0.828	0.295	0.86	0.6	0.893	0.763	0.898	0.844	0.5685	0.269502	0.859	0.152	0.814	0.152	0.85	0.152	0.878	0.152	0.914	0.152	0.31	0.35	0.38	0.43	0.3	0.25	0.13	0.11	0.62	0.59
CCHa1	3209920196	801	cyce	Dict	0.5284				0.06	0.47	0.74	0.25	0.09	0.906	0.718	0.874	0.309	0.899	0.652	0.925	0.798	0.928	0.888	0.9349	0.269502	0.901	0.152	0.857	0.152	0.891	0.152	0.92	0.152	0.936	0.152	0.46	0.5	0.47	0.39	0.06	0.21	0.54	0.55	0.2	0.19
CCHa1	3209920196	801	dally	Dict	0.7683		*		0.64	0.29	0.47	0.31	0.12	0.906	0.705	0.866	0.306	0.895	0.649	0.919	0.783	0.941	0.845	0.8955	0.269502	0.912	0.152	0.867	0.152	0.901	0.152	0.928	0.152	0.935	0.152	0.18	0.23	0.62	0.64	0.21	0.06	0.18	0.18	0.57	0.56
CCHa1	3209920196	801	emc	Dict	0.5837				0.54	0.06	0.44	0.37	0.03	0.797	0.601	0.752	0.255	0.791	0.535	0.833	0.683	0.848	0.776	0.3552	0.269502	0.815	0.152	0.761	0.152	0.801	0.152	0.836	0.152	0.867	0.152	0.15	0.08	0.65	0.67	0.07	0.11	0.07	0.06	0.31	0.3
CCHa1	3209920196	801	foxo	Dict	0.7116		**		0.34	0.29	0.45	0.29	0	0.752	0.553	0.703	0.242	0.741	0.489	0.775	0.636	0.778	0.742	0.2659	0.269502	0.751	0.152	0.698	0.152	0.739	0.152	0.775	0.152	0.79	0.152	0.2	0.25	0.53	0.51	0.07	0.07	0.17	0.18	0.3	0.28
CCHa1	3209920196	801	kay	Dict	0.5339				0.28	0.64	0.08	0.07	0.3	0.825	0.609	0.772	0.243	0.814	0.538	0.851	0.678	0.862	0.785	0.4534	0.269502	0.821	0.152	0.767	0.152	0.806	0.152	0.839	0.152	0.857	0.152	0.47	0.49	0.19	0.23	0.32	0.32	0.18	0.13	0.28	0.24
CCHa1	3209920196	801	kn	Dict	0.6367				0.64	0.28	0.11	0.11	0.28	0.824	0.637	0.777	0.296	0.81	0.565	0.844	0.703	0.867	0.779	0.3931	0.269502	0.815	0.152	0.763	0.152	0.803	0.152	0.833	0.152	0.858	0.152	0.43	0.39	0.35	0.43	0.14	0.05	0.01	0.04	0.51	0.51
CCHa1	3209920196	801	mad	Dict	0.557				0.84	0.08	0.2	0.2	0.07	0.894	0.724	0.866	0.359	0.887	0.661	0.91	0.811	0.922	0.847	0.5446	0.269502	0.889	0.152	0.854	0.152	0.881	0.152	0.901	0.152	0.907	0.152	0.2	0.16	0.38	0.54	0.57	0.49	0.28	0.25	0.5	0.46
CCHa1	3209920196	801	s6k	Dict	0.6967		**		0.41	0.16	0.42	0.15	0.43	0.797	0.575	0.75	0.247	0.785	0.514	0.818	0.673	0.836	0.777	0.3905	0.269502	0.79	0.152	0.728	0.152	0.774	0.152	0.814	0.152	0.852	0.152	0.22	0.16	0.48	0.46	0.17	0.29	0.14	0.09	0.47	0.48
CCHa1	3209920196	801	sav	Dict	0.5488				0.34	0.81	0.01	0.18	0.13	0.914	0.732	0.873	0.328	0.904	0.656	0.928	0.795	0.931	0.931	0.5947	0.269502	0.909	0.152	0.868	0.152	0.902	0.152	0.929	0.152	0.952	0.152	0.58	0.56	0.05	0.15	0.59	0.59	0.16	0.23	0.3	0.28
CCHa1	3209920196	801	sgg	Dict	0.6868		*		0.51	0.37	0.25	0.17	0.44	0.862	0.625	0.799	0.263	0.848	0.576	0.881	0.727	0.9	0.823	1.7731	0.269502	0.841	0.152	0.783	0.152	0.828	0.152	0.862	0.152	0.907	0.152	0.21	0.23	0.29	0.34	0.24	0.18	0.23	0.22	0.74	0.74
CCHa1	3209920196	801	spi	Dict	0.5607				0.23	0.37	0.57	0.11	0.37	0.827	0.601	0.778	0.242	0.821	0.54	0.837	0.698	0.84	0.809	0.4719	0.269502	0.83	0.152	0.779	0.152	0.818	0.152	0.856	0.152	0.893	0.152	0.4	0.43	0.43	0.36	0.07	0.16	0.33	0.31	0.43	0.45
CCHa1	3209920196	801	tai	Dict	0.7606		*		0.71	0.17	0.56	0.09	0.01	0.894	0.73	0.862	0.338	0.889	0.654	0.907	0.805	0.908	0.848	0.4654	0.269502	0.899	0.152	0.868	0.152	0.893	0.152	0.908	0.152	0.921	0.152	0	0.07	0.78	0.84	0.33	0.1	0.31	0.32	0.15	0.14
CCHa1	3209920196	801	tx	Dict	0.5496				0.06	0.74	0.53	0.01	0.18	0.914	0.73	0.868	0.33	0.9	0.655	0.928	0.801	0.928	0.839	0.9684	0.269502	0.903	0.152	0.866	0.152	0.895	0.152	0.917	0.152	0.929	0.152	0.74	0.75	0.23	0.15	0.01	0.04	0.43	0.45	0.19	0.2
CCHa1r	2213540730	385	cg33299	Dict	0.5146		*		0.12	0.4	0.25	0.04	0.13	0.694	0.445	0.623	0.173	0.677	0.379	0.725	0.555	0.757	0.669	0.2309	0.237707	0.674	0.152	0.605	0.152	0.658	0.152	0.702	0.152	0.723	0.152	0.38	0.36	0.07	0.06	0.21	0.25	0.26	0.2	0.16	0.19
CCHa1r	2213540730	385	dll	Dict	0.5337				0.22	0.84	0.07	0.09	0.13	0.893	0.691	0.855	0.319	0.882	0.626	0.902	0.775	0.916	0.881	0.8412	0.237707	0.894	0.152	0.854	0.152	0.885	0.152	0.911	0.152	0.924	0.152	0.68	0.66	0.07	0.15	0.59	0.59	0.03	0.11	0.06	0.04
CCHa1r	2213540730	385	ds	Dict	0.5048				0.39	0.84	0.12	0.23	0.09	0.937	0.759	0.903	0.356	0.929	0.684	0.943	0.852	0.947	0.903	5.7655	0.237707	0.932	0.152	0.898	0.152	0.925	0.152	0.944	0.152	0.956	0.152	0.89	0.85	0.21	0.26	0.14	0.21	0.26	0.31	0.22	0.21
CCHa1r	2213540730	385	ft	Dict	0.512				0.39	0.75	0.08	0.35	0.1	0.927	0.72	0.889	0.323	0.919	0.649	0.933	0.808	0.941	0.888	4.3023	0.237707	0.916	0.152	0.877	0.152	0.907	0.152	0.938	0.152	0.95	0.152	0.77	0.7	0.42	0.43	0.25	0.36	0.22	0.28	0.21	0.2
CCHa1r	2213540730	385	mats	Dict	0.6262				0.58	0.58	0.2	0.15	0.19	0.892	0.685	0.853	0.318	0.882	0.628	0.899	0.766	0.9	0.866	3.5887	0.237707	0.884	0.152	0.843	0.152	0.875	0.152	0.897	0.152	0.918	0.152	0.72	0.65	0.54	0.62	0.07	0.12	0.01	0.04	0.07	0.04
CG10131	2210521380	361	btd	Dict	0.5963				0.83	0.17	0.22	0.01	0.09	0.891	0.703	0.854	0.334	0.882	0.638	0.904	0.803	0.91	0.863	0.5246	0.396113	0.889	0.152	0.851	0.152	0.882	0.152	0.899	0.152	0.921	0.152	0.06	0.02	0.53	0.66	0.51	0.36	0.14	0.16	0.45	0.44
CG10131	2210521380	361	cg14147	Dict	0.5132				0.55	0.18	0.24	0.12	0.04	0.733	0.54	0.685	0.256	0.721	0.496	0.752	0.618	0.76	0.693	0.3374	0.396113	0.737	0.152	0.68	0.152	0.721	0.152	0.759	0.152	0.801	0.152	0.38	0.37	0.21	0.34	0.32	0.21	0.4	0.39	0.38	0.38
CG10131	2210521380	361	ct	Muta	0.5952		*		0.54	0.02	0.38	0.03	0.09	0.705	0.538	0.664	0.253	0.701	0.484	0.718	0.607	0.733	0.65	0.0056	0.396113	0.715	0.152	0.672	0.152	0.705	0.152	0.731	0.152	0.766	0.152	0.12	0.08	0.47	0.51	0.18	0.03	0.25	0.22	0.25	0.27
CG10131	2210521380	361	dally	Dict	0.6067				0.64	0.29	0.47	0.31	0.12	0.906	0.705	0.866	0.306	0.895	0.649	0.919	0.783	0.941	0.845	0.8955	0.396113	0.912	0.152	0.867	0.152	0.901	0.152	0.928	0.152	0.935	0.152	0.18	0.23	0.62	0.64	0.21	0.06	0.18	0.18	0.57	0.56
CG10131	2210521380	361	emc	Dict	0.7123		**		0.54	0.06	0.44	0.37	0.03	0.797	0.601	0.752	0.255	0.791	0.535	0.833	0.683	0.848	0.776	0.3552	0.396113	0.815	0.152	0.761	0.152	0.801	0.152	0.836	0.152	0.867	0.152	0.15	0.08	0.65	0.67	0.07	0.11	0.07	0.06	0.31	0.3
CG10131	2210521380	361	fj	Dict	0.5476				0.84	0.35	0.16	0.16	0.06	0.938	0.763	0.909	0.355	0.932	0.705	0.952	0.857	0.956	0.929	2.0627	0.396113	0.928	0.152	0.894	0.152	0.921	0.152	0.941	0.152	0.953	0.152	0.59	0.54	0.46	0.61	0.39	0.27	0.29	0.29	0.37	0.34
CG10131	2210521380	361	ft	Dict	0.5708				0.39	0.75	0.08	0.35	0.1	0.927	0.72	0.889	0.323	0.919	0.649	0.933	0.808	0.941	0.888	4.3023	0.396113	0.916	0.152	0.877	0.152	0.907	0.152	0.938	0.152	0.95	0.152	0.77	0.7	0.42	0.43	0.25	0.36	0.22	0.28	0.21	0.2
CG10131	2210521380	361	limk1	Dict	0.5328		*		0.03	0.2	0.47	0.05	0.21	0.738	0.462	0.663	0.171	0.724	0.399	0.769	0.562	0.782	0.695	0.4325	0.396113	0.735	0.152	0.66	0.152	0.721	0.152	0.762	0.152	0.797	0.152	0.14	0.08	0.52	0.45	0.22	0.39	0.19	0.16	0.31	0.31
CG10131	2210521380	361	mats	Dict	0.6702				0.58	0.58	0.2	0.15	0.19	0.892	0.685	0.853	0.318	0.882	0.628	0.899	0.766	0.9	0.866	3.5887	0.396113	0.884	0.152	0.843	0.152	0.875	0.152	0.897	0.152	0.918	0.152	0.72	0.65	0.54	0.62	0.07	0.12	0.01	0.04	0.07	0.04
CG10131	2210521380	361	sd	Dict	0.5953				0.34	0.63	0.37	0.24	0.02	0.856	0.667	0.823	0.286	0.851	0.597	0.87	0.767	0.871	0.849	5.3633	0.396113	0.87	0.152	0.824	0.152	0.861	0.152	0.885	0.152	0.905	0.152	0.7	0.64	0.42	0.45	0.08	0.25	0.3	0.25	0.11	0.09
CG10131	2210521380	361	tai	Dict	0.7296				0.71	0.17	0.56	0.09	0.01	0.894	0.73	0.862	0.338	0.889	0.654	0.907	0.805	0.908	0.848	0.4654	0.396113	0.899	0.152	0.868	0.152	0.893	0.152	0.908	0.152	0.921	0.152	0	0.07	0.78	0.84	0.33	0.1	0.31	0.32	0.15	0.14
CG10131	2210521380	361	ubx	Dict	0.7052				0.45	0.7	0.38	0.06	0.15	0.916	0.737	0.881	0.325	0.908	0.669	0.924	0.823	0.952	0.891	0.6049	0.396113	0.91	0.152	0.876	0.152	0.902	0.152	0.929	0.152	0.943	0.152	0.74	0.7	0.38	0.42	0.12	0.27	0.29	0.22	0.23	0.25
CG10200	2210696472	365	ap	Dict	0.6437				0.13	0.81	0.11	0.15	0.22	0.856	0.666	0.815	0.299	0.847	0.607	0.87	0.745	0.871	0.826	0.394	0.122123	0.86	0.152	0.82	0.152	0.852	0.152	0.875	0.152	0.892	0.152	0.74	0.76	0.27	0.23	0.17	0.16	0.1	0.06	0.21	0.18
CG10200	2210696472	365	brk	Dict	0.9036		**		0.23	0.77	0.25	0.5	0.11	0.919	0.718	0.886	0.323	0.914	0.651	0.937	0.802	0.946	0.885	2.1159	0.122123	0.925	0.152	0.883	0.152	0.916	0.152	0.939	0.152	0.957	0.152	0.69	0.71	0.37	0.36	0.24	0.17	0.03	0.08	0.36	0.33
CG10200	2210696472	365	bun	Dict	0.5064				0.18	0.78	0.06	0.17	0.19	0.885	0.664	0.841	0.31	0.875	0.609	0.91	0.742	0.935	0.885	0.7822	0.122123	0.887	0.152	0.834	0.152	0.874	0.152	0.905	0.152	0.925	0.152	0.54	0.52	0.04	0.14	0.61	0.58	0.13	0.22	0.05	0.09
CG10200	2210696472	365	bx	Dict	0.84		**		0.2	0.83	0.2	0.29	0.05	0.899	0.714	0.867	0.309	0.895	0.651	0.907	0.792	0.914	0.858	1.1999	0.122123	0.901	0.152	0.863	0.152	0.894	0.152	0.918	0.152	0.934	0.152	0.79	0.8	0.29	0.26	0.25	0.22	0.02	0.06	0.34	0.32
CG10200	2210696472	365	cg4267	Dict	0.5466				0.34	0.23	0.51	0.34	0.33	0.814	0.59	0.77	0.242	0.807	0.53	0.854	0.675	0.854	0.806	0.4521	0.122123	0.81	0.152	0.754	0.152	0.798	0.152	0.83	0.152	0.853	0.152	0.19	0.23	0.4	0.37	0.06	0.15	0.31	0.28	0.66	0.66
CG10200	2210696472	365	chn	Dict	0.5068				0.57	0.17	0.13	0.45	0.34	0.826	0.601	0.773	0.271	0.817	0.544	0.858	0.702	0.881	0.766	0.9439	0.122123	0.824	0.152	0.768	0.152	0.81	0.152	0.847	0.152	0.865	0.152	0.02	0.02	0.44	0.53	0.4	0.27	0.03	0.06	0.35	0.31
CG10200	2210696472	365	cv2	Dict	0.7007		*		0.56	0.49	0.08	0.38	0.25	0.87	0.685	0.828	0.295	0.86	0.6	0.893	0.763	0.898	0.844	0.5685	0.122123	0.859	0.152	0.814	0.152	0.85	0.152	0.878	0.152	0.914	0.152	0.31	0.35	0.38	0.43	0.3	0.25	0.13	0.11	0.62	0.59
CG10200	2210696472	365	cyce	Dict	0.6688				0.06	0.47	0.74	0.25	0.09	0.906	0.718	0.874	0.309	0.899	0.652	0.925	0.798	0.928	0.888	0.9349	0.122123	0.901	0.152	0.857	0.152	0.891	0.152	0.92	0.152	0.936	0.152	0.46	0.5	0.47	0.39	0.06	0.21	0.54	0.55	0.2	0.19
CG10200	2210696472	365	dally	Dict	0.7253		*		0.64	0.29	0.47	0.31	0.12	0.906	0.705	0.866	0.306	0.895	0.649	0.919	0.783	0.941	0.845	0.8955	0.122123	0.912	0.152	0.867	0.152	0.901	0.152	0.928	0.152	0.935	0.152	0.18	0.23	0.62	0.64	0.21	0.06	0.18	0.18	0.57	0.56
CG10200	2210696472	365	dll	Dict	0.6498				0.22	0.84	0.07	0.09	0.13	0.893	0.691	0.855	0.319	0.882	0.626	0.902	0.775	0.916	0.881	0.8412	0.122123	0.894	0.152	0.854	0.152	0.885	0.152	0.911	0.152	0.924	0.152	0.68	0.66	0.07	0.15	0.59	0.59	0.03	0.11	0.06	0.04
CG10200	2210696472	365	dpp	Dict	0.7528		*		0.44	0.75	0.19	0.01	0.02	0.891	0.7	0.852	0.316	0.883	0.644	0.907	0.794	0.913	0.856	0.4649	0.122123	0.891	0.152	0.853	0.152	0.884	0.152	0.902	0.152	0.92	0.152	0.58	0.59	0.35	0.4	0.49	0.42	0.15	0.2	0.22	0.21
CG10200	2210696472	365	ex	Dict	0.604				0.04	0.82	0.43	0.12	0.04	0.914	0.73	0.883	0.322	0.91	0.661	0.92	0.832	0.947	0.875	5.4462	0.122123	0.918	0.152	0.88	0.152	0.909	0.152	0.929	0.152	0.944	0.152	0.82	0.81	0.21	0.17	0.21	0.15	0.42	0.47	0.01	0.01
CG10200	2210696472	365	foxo	Dict	0.6		*		0.34	0.29	0.45	0.29	0	0.752	0.553	0.703	0.242	0.741	0.489	0.775	0.636	0.778	0.742	0.2659	0.122123	0.751	0.152	0.698	0.152	0.739	0.152	0.775	0.152	0.79	0.152	0.2	0.25	0.53	0.51	0.07	0.07	0.17	0.18	0.3	0.28
CG10200	2210696472	365	fz	Dict	0.6558		*		0.06	0.7	0.17	0.26	0.24	0.85	0.643	0.804	0.281	0.839	0.574	0.861	0.74	0.866	0.798	0.4509	0.122123	0.841	0.152	0.79	0.152	0.826	0.152	0.861	0.152	0.882	0.152	0.77	0.78	0.15	0.08	0.06	0.08	0.02	0.03	0.39	0.4
CG10200	2210696472	365	kay	Dict	0.5164				0.28	0.64	0.08	0.07	0.3	0.825	0.609	0.772	0.243	0.814	0.538	0.851	0.678	0.862	0.785	0.4534	0.122123	0.821	0.152	0.767	0.152	0.806	0.152	0.839	0.152	0.857	0.152	0.47	0.49	0.19	0.23	0.32	0.32	0.18	0.13	0.28	0.24
CG10200	2210696472	365	kni	Dict	0.5678		*		0.08	0.39	0.31	0.54	0.03	0.798	0.528	0.732	0.217	0.778	0.462	0.84	0.638	0.859	0.778	0.3592	0.122123	0.808	0.152	0.738	0.152	0.795	0.152	0.832	0.152	0.852	0.152	0.34	0.32	0.13	0.12	0.16	0.25	0.41	0.36	0.44	0.41
CG10200	2210696472	365	luna	Dict	0.705		*		0.18	0.75	0.2	0.38	0.08	0.869	0.647	0.82	0.292	0.86	0.599	0.88	0.733	0.882	0.805	0.3695	0.122123	0.861	0.152	0.819	0.152	0.852	0.152	0.879	0.152	0.903	0.152	0.62	0.62	0.08	0.12	0.38	0.41	0.28	0.2	0.3	0.25
CG10200	2210696472	365	mpk2	Dict	0.775		**		0.18	0.68	0.09	0.37	0.15	0.846	0.633	0.806	0.278	0.839	0.57	0.862	0.742	0.889	0.829	0.4463	0.122123	0.849	0.152	0.797	0.152	0.837	0.152	0.878	0.152	0.903	0.152	0.61	0.59	0.05	0.06	0.23	0.26	0.05	0.09	0.59	0.58
CG10200	2210696472	365	nmo	Dict	0.6942				0.31	0.81	0.35	0.29	0.15	0.94	0.734	0.907	0.346	0.934	0.656	0.96	0.831	0.961	0.909	2.0873	0.122123	0.938	0.152	0.902	0.152	0.931	0.152	0.953	0.152	0.963	0.152	0.92	0.92	0.07	0.06	0.16	0.13	0.17	0.2	0.2	0.2
CG10200	2210696472	365	pnt	Dict	0.7498		*		0.28	0.69	0.03	0.39	0.09	0.858	0.653	0.816	0.281	0.853	0.584	0.873	0.772	0.886	0.829	0.9325	0.122123	0.843	0.152	0.802	0.152	0.836	0.152	0.865	0.152	0.891	0.152	0.52	0.53	0.21	0.26	0.4	0.37	0.11	0.04	0.34	0.29
CG10200	2210696472	365	poc1	Dict	0.6549		*		0.34	0.49	0.08	0.28	0.08	0.801	0.576	0.742	0.257	0.791	0.523	0.832	0.664	0.843	0.724	0.4028	0.122123	0.795	0.152	0.734	0.152	0.78	0.152	0.824	0.152	0.87	0.152	0.31	0.29	0.02	0.07	0.38	0.38	0.25	0.29	0.69	0.68
CG10200	2210696472	365	rho	Dict	0.5461				0.42	0.64	0.27	0.24	0.06	0.883	0.676	0.842	0.302	0.873	0.632	0.896	0.784	0.901	0.867	0.6139	0.122123	0.882	0.152	0.835	0.152	0.87	0.152	0.895	0.152	0.913	0.152	0.45	0.44	0.28	0.37	0.56	0.47	0.39	0.44	0.18	0.17
CG10200	2210696472	365	sav	Dict	0.5947				0.34	0.81	0.01	0.18	0.13	0.914	0.732	0.873	0.328	0.904	0.656	0.928	0.795	0.931	0.931	0.5947	0.122123	0.909	0.152	0.868	0.152	0.902	0.152	0.929	0.152	0.952	0.152	0.58	0.56	0.05	0.15	0.59	0.59	0.16	0.23	0.3	0.28
CG10200	2210696472	365	ser	Dict	0.5998				0.11	0.78	0.3	0.27	0.16	0.893	0.688	0.842	0.31	0.879	0.621	0.905	0.793	0.918	0.869	0.4217	0.122123	0.876	0.152	0.833	0.152	0.868	0.152	0.891	0.152	0.919	0.152	0.69	0.66	0.2	0.16	0.36	0.45	0.2	0.11	0.1	0.06
CG10200	2210696472	365	shn	Dict	0.5061				0.07	0.42	0.09	0.6	0.08	0.789	0.552	0.733	0.222	0.78	0.475	0.812	0.651	0.824	0.737	0.7674	0.122123	0.779	0.152	0.71	0.152	0.762	0.152	0.81	0.152	0.865	0.152	0.35	0.37	0.05	0.03	0.05	0.08	0.21	0.19	0.46	0.41
CG10200	2210696472	365	spi	Dict	0.5421				0.23	0.37	0.57	0.11	0.37	0.827	0.601	0.778	0.242	0.821	0.54	0.837	0.698	0.84	0.809	0.4719	0.122123	0.83	0.152	0.779	0.152	0.818	0.152	0.856	0.152	0.893	0.152	0.4	0.43	0.43	0.36	0.07	0.16	0.33	0.31	0.43	0.45
CG10200	2210696472	365	tmod	Dict	0.5753				0.2	0.49	0.1	0.6	0.13	0.821	0.592	0.765	0.243	0.814	0.518	0.84	0.668	0.868	0.753	0.6584	0.122123	0.822	0.152	0.761	0.152	0.81	0.152	0.852	0.152	0.876	0.152	0.57	0.56	0.02	0.09	0.05	0.01	0.01	0.04	0.36	0.34
CG10200	2210696472	365	tx	Dict	0.6567				0.06	0.74	0.53	0.01	0.18	0.914	0.73	0.868	0.33	0.9	0.655	0.928	0.801	0.928	0.839	0.9684	0.122123	0.903	0.152	0.866	0.152	0.895	0.152	0.917	0.152	0.929	0.152	0.74	0.75	0.23	0.15	0.01	0.04	0.43	0.45	0.19	0.2
CG10200	2210696472	365	wts	Dict	0.5007				0.36	0.69	0.38	0.08	0.22	0.894	0.718	0.857	0.324	0.886	0.645	0.917	0.809	0.926	0.882	0.9344	0.122123	0.887	0.152	0.845	0.152	0.877	0.152	0.901	0.152	0.918	0.152	0.79	0.77	0.09	0.2	0.16	0.12	0.41	0.42	0.22	0.24
CG10202	2210709767	367	mer	Dict	0.5405				0.55	0.22	0.26	0.44	0.25	0.801	0.584	0.747	0.252	0.783	0.511	0.832	0.672	0.836	0.714	0.5311	0.0498998	0.805	0.152	0.756	0.152	0.794	0.152	0.829	0.152	0.878	0.152	0.03	0.03	0.1	0.25	0.57	0.55	0.11	0.08	0.08	0.08
CG10202	2210709767	367	sgg	Dict	0.5128				0.51	0.37	0.25	0.17	0.44	0.862	0.625	0.799	0.263	0.848	0.576	0.881	0.727	0.9	0.823	1.7731	0.0498998	0.841	0.152	0.783	0.152	0.828	0.152	0.862	0.152	0.907	0.152	0.21	0.23	0.29	0.34	0.24	0.18	0.23	0.22	0.74	0.74
CG10202	2210709789	367	vang	Dict	0.5649		*		0.2	0.01	0.23	0.3	0.66	0.779	0.47	0.703	0.168	0.763	0.403	0.809	0.59	0.814	0.721	0.3247	0.150198	0.763	0.152	0.688	0.152	0.745	0.152	0.799	0.152	0.832	0.152	0.18	0.18	0.04	0.15	0.4	0.36	0.18	0.1	0.11	0.17
CG10384	2218331505	455	ap	Dict	0.6042				0.13	0.81	0.11	0.15	0.22	0.856	0.666	0.815	0.299	0.847	0.607	0.87	0.745	0.871	0.826	0.394	0.455307	0.86	0.152	0.82	0.152	0.852	0.152	0.875	0.152	0.892	0.152	0.74	0.76	0.27	0.23	0.17	0.16	0.1	0.06	0.21	0.18
CG10384	2218331505	455	aret	Dict	0.5026				0.66	0.06	0.37	0.12	0	0.844	0.652	0.797	0.293	0.836	0.595	0.861	0.737	0.868	0.861	0.4688	0.455307	0.843	0.152	0.795	0.152	0.833	0.152	0.863	0.152	0.885	0.152	0.22	0.23	0.02	0.18	0.65	0.65	0.14	0.1	0.52	0.5
CG10384	2218331505	455	brk	Dict	0.7824		*		0.23	0.77	0.25	0.5	0.11	0.919	0.718	0.886	0.323	0.914	0.651	0.937	0.802	0.946	0.885	2.1159	0.455307	0.925	0.152	0.883	0.152	0.916	0.152	0.939	0.152	0.957	0.152	0.69	0.71	0.37	0.36	0.24	0.17	0.03	0.08	0.36	0.33
CG10384	2218331505	455	bx	Dict	0.7404		*		0.2	0.83	0.2	0.29	0.05	0.899	0.714	0.867	0.309	0.895	0.651	0.907	0.792	0.914	0.858	1.1999	0.455307	0.901	0.152	0.863	0.152	0.894	0.152	0.918	0.152	0.934	0.152	0.79	0.8	0.29	0.26	0.25	0.22	0.02	0.06	0.34	0.32
CG10384	2218331505	455	cv2	Dict	0.7028		*		0.56	0.49	0.08	0.38	0.25	0.87	0.685	0.828	0.295	0.86	0.6	0.893	0.763	0.898	0.844	0.5685	0.455307	0.859	0.152	0.814	0.152	0.85	0.152	0.878	0.152	0.914	0.152	0.31	0.35	0.38	0.43	0.3	0.25	0.13	0.11	0.62	0.59
CG10384	2218331505	455	dally	Dict	0.6131				0.64	0.29	0.47	0.31	0.12	0.906	0.705	0.866	0.306	0.895	0.649	0.919	0.783	0.941	0.845	0.8955	0.455307	0.912	0.152	0.867	0.152	0.901	0.152	0.928	0.152	0.935	0.152	0.18	0.23	0.62	0.64	0.21	0.06	0.18	0.18	0.57	0.56
CG10384	2218331505	455	dll	Dict	0.5808				0.22	0.84	0.07	0.09	0.13	0.893	0.691	0.855	0.319	0.882	0.626	0.902	0.775	0.916	0.881	0.8412	0.455307	0.894	0.152	0.854	0.152	0.885	0.152	0.911	0.152	0.924	0.152	0.68	0.66	0.07	0.15	0.59	0.59	0.03	0.11	0.06	0.04
CG10384	2218331505	455	dlp	Dict	0.581				0.22	0.56	0.21	0.39	0.18	0.845	0.586	0.784	0.258	0.829	0.528	0.86	0.691	0.881	0.769	0.9958	0.455307	0.815	0.152	0.755	0.152	0.8	0.152	0.84	0.152	0.86	0.152	0.56	0.54	0.26	0.3	0.02	0.14	0.16	0.13	0.33	0.32
CG10384	2218331505	455	dpp	Dict	0.6085				0.44	0.75	0.19	0.01	0.02	0.891	0.7	0.852	0.316	0.883	0.644	0.907	0.794	0.913	0.856	0.4649	0.455307	0.891	0.152	0.853	0.152	0.884	0.152	0.902	0.152	0.92	0.152	0.58	0.59	0.35	0.4	0.49	0.42	0.15	0.2	0.22	0.21
CG10384	2218331505	455	dys	Dict	0.5308		**		0.3	0.15	0	0.26	0.17	0.644	0.408	0.583	0.162	0.634	0.359	0.657	0.488	0.675	0.548	0.3208	0.455307	0.669	0.152	0.593	0.152	0.651	0.152	0.708	0.152	0.744	0.152	0.05	0.04	0.06	0.01	0.21	0.23	0.14	0.14	0.66	0.66
CG10384	2218331505	455	en	Dict	0.5081		*		0.37	0.07	0.27	0.41	0.01	0.759	0.502	0.689	0.208	0.742	0.439	0.788	0.612	0.794	0.771	0.7048	0.455307	0.751	0.152	0.684	0.152	0.734	0.152	0.77	0.152	0.806	0.152	0.05	0.06	0.01	0.1	0.29	0.31	0.28	0.26	0.51	0.48
CG10384	2218331505	455	fz	Dict	0.6768		*		0.06	0.7	0.17	0.26	0.24	0.85	0.643	0.804	0.281	0.839	0.574	0.861	0.74	0.866	0.798	0.4509	0.455307	0.841	0.152	0.79	0.152	0.826	0.152	0.861	0.152	0.882	0.152	0.77	0.78	0.15	0.08	0.06	0.08	0.02	0.03	0.39	0.4
CG10384	2218331505	455	kay	Dict	0.5439				0.28	0.64	0.08	0.07	0.3	0.825	0.609	0.772	0.243	0.814	0.538	0.851	0.678	0.862	0.785	0.4534	0.455307	0.821	0.152	0.767	0.152	0.806	0.152	0.839	0.152	0.857	0.152	0.47	0.49	0.19	0.23	0.32	0.32	0.18	0.13	0.28	0.24
CG10384	2218331505	455	kni	Dict	0.5764		*		0.08	0.39	0.31	0.54	0.03	0.798	0.528	0.732	0.217	0.778	0.462	0.84	0.638	0.859	0.778	0.3592	0.455307	0.808	0.152	0.738	0.152	0.795	0.152	0.832	0.152	0.852	0.152	0.34	0.32	0.13	0.12	0.16	0.25	0.41	0.36	0.44	0.41
CG10384	2218331505	455	luna	Dict	0.7		*		0.18	0.75	0.2	0.38	0.08	0.869	0.647	0.82	0.292	0.86	0.599	0.88	0.733	0.882	0.805	0.3695	0.455307	0.861	0.152	0.819	0.152	0.852	0.152	0.879	0.152	0.903	0.152	0.62	0.62	0.08	0.12	0.38	0.41	0.28	0.2	0.3	0.25
CG10384	2218331505	455	mpk2	Dict	0.7023		*		0.18	0.68	0.09	0.37	0.15	0.846	0.633	0.806	0.278	0.839	0.57	0.862	0.742	0.889	0.829	0.4463	0.455307	0.849	0.152	0.797	0.152	0.837	0.152	0.878	0.152	0.903	0.152	0.61	0.59	0.05	0.06	0.23	0.26	0.05	0.09	0.59	0.58
CG10384	2218331505	455	nmo	Dict	0.5634				0.31	0.81	0.35	0.29	0.15	0.94	0.734	0.907	0.346	0.934	0.656	0.96	0.831	0.961	0.909	2.0873	0.455307	0.938	0.152	0.902	0.152	0.931	0.152	0.953	0.152	0.963	0.152	0.92	0.92	0.07	0.06	0.16	0.13	0.17	0.2	0.2	0.2
CG10384	2218331505	455	pnt	Dict	0.6854		*		0.28	0.69	0.03	0.39	0.09	0.858	0.653	0.816	0.281	0.853	0.584	0.873	0.772	0.886	0.829	0.9325	0.455307	0.843	0.152	0.802	0.152	0.836	0.152	0.865	0.152	0.891	0.152	0.52	0.53	0.21	0.26	0.4	0.37	0.11	0.04	0.34	0.29
CG10384	2218331505	455	poc1	Dict	0.6892		**		0.34	0.49	0.08	0.28	0.08	0.801	0.576	0.742	0.257	0.791	0.523	0.832	0.664	0.843	0.724	0.4028	0.455307	0.795	0.152	0.734	0.152	0.78	0.152	0.824	0.152	0.87	0.152	0.31	0.29	0.02	0.07	0.38	0.38	0.25	0.29	0.69	0.68
CG10384	2218331505	455	sav	Dict	0.557				0.34	0.81	0.01	0.18	0.13	0.914	0.732	0.873	0.328	0.904	0.656	0.928	0.795	0.931	0.931	0.5947	0.455307	0.909	0.152	0.868	0.152	0.902	0.152	0.929	0.152	0.952	0.152	0.58	0.56	0.05	0.15	0.59	0.59	0.16	0.23	0.3	0.28
CG10384	2218331505	455	ser	Dict	0.6117				0.11	0.78	0.3	0.27	0.16	0.893	0.688	0.842	0.31	0.879	0.621	0.905	0.793	0.918	0.869	0.4217	0.455307	0.876	0.152	0.833	0.152	0.868	0.152	0.891	0.152	0.919	0.152	0.69	0.66	0.2	0.16	0.36	0.45	0.2	0.11	0.1	0.06
CG10384	2218331505	455	sgg	Dict	0.5396				0.51	0.37	0.25	0.17	0.44	0.862	0.625	0.799	0.263	0.848	0.576	0.881	0.727	0.9	0.823	1.7731	0.455307	0.841	0.152	0.783	0.152	0.828	0.152	0.862	0.152	0.907	0.152	0.21	0.23	0.29	0.34	0.24	0.18	0.23	0.22	0.74	0.74
CG10384	2218331505	455	shn	Dict	0.6595		**		0.07	0.42	0.09	0.6	0.08	0.789	0.552	0.733	0.222	0.78	0.475	0.812	0.651	0.824	0.737	0.7674	0.455307	0.779	0.152	0.71	0.152	0.762	0.152	0.81	0.152	0.865	0.152	0.35	0.37	0.05	0.03	0.05	0.08	0.21	0.19	0.46	0.41
CG10384	2218331505	455	sls	Dict	0.5514				0.72	0.33	0.05	0.14	0.22	0.84	0.68	0.801	0.314	0.832	0.622	0.857	0.744	0.874	0.801	0.5182	0.455307	0.839	0.152	0.799	0.152	0.832	0.152	0.859	0.152	0.883	0.152	0.03	0.07	0.46	0.61	0.64	0.52	0.12	0.06	0.21	0.16
CG10384	2218331505	455	tmod	Dict	0.6249		*		0.2	0.49	0.1	0.6	0.13	0.821	0.592	0.765	0.243	0.814	0.518	0.84	0.668	0.868	0.753	0.6584	0.455307	0.822	0.152	0.761	0.152	0.81	0.152	0.852	0.152	0.876	0.152	0.57	0.56	0.02	0.09	0.05	0.01	0.01	0.04	0.36	0.34
CG10737	2215060677	397	dgo	Dict	0.5286				0.31	0.6	0.04	0.22	0.16	0.815	0.614	0.762	0.276	0.801	0.553	0.832	0.684	0.856	0.801	0.4284	0.194046	0.789	0.152	0.742	0.152	0.777	0.152	0.819	0.152	0.84	0.152	0.66	0.61	0.24	0.26	0.17	0.23	0.22	0.26	0.23	0.21
CG10737	2215060677	397	ds	Dict	0.5655				0.39	0.84	0.12	0.23	0.09	0.937	0.759	0.903	0.356	0.929	0.684	0.943	0.852	0.947	0.903	5.7655	0.194046	0.932	0.152	0.898	0.152	0.925	0.152	0.944	0.152	0.956	0.152	0.89	0.85	0.21	0.26	0.14	0.21	0.26	0.31	0.22	0.21
CG10737	2215060677	397	fj	Dict	0.6322				0.84	0.35	0.16	0.16	0.06	0.938	0.763	0.909	0.355	0.932	0.705	0.952	0.857	0.956	0.929	2.0627	0.194046	0.928	0.152	0.894	0.152	0.921	0.152	0.941	0.152	0.953	0.152	0.59	0.54	0.46	0.61	0.39	0.27	0.29	0.29	0.37	0.34
CG10737	2215060677	397	ft	Dict	0.5536				0.39	0.75	0.08	0.35	0.1	0.927	0.72	0.889	0.323	0.919	0.649	0.933	0.808	0.941	0.888	4.3023	0.194046	0.916	0.152	0.877	0.152	0.907	0.152	0.938	0.152	0.95	0.152	0.77	0.7	0.42	0.43	0.25	0.36	0.22	0.28	0.21	0.2
CG10737	2215060677	397	stg	Dict	0.6633		*		0.25	0.54	0.35	0.48	0.09	0.864	0.657	0.816	0.263	0.854	0.585	0.882	0.756	0.884	0.858	1.0297	0.194046	0.866	0.152	0.81	0.152	0.852	0.152	0.889	0.152	0.914	0.152	0.63	0.59	0.01	0.07	0.07	0.06	0.41	0.44	0.37	0.33
CG10752	3112948998	643	ap	Dict	0.6858		*		0.13	0.81	0.11	0.15	0.22	0.856	0.666	0.815	0.299	0.847	0.607	0.87	0.745	0.871	0.826	0.394	0.0972892	0.86	0.152	0.82	0.152	0.852	0.152	0.875	0.152	0.892	0.152	0.74	0.76	0.27	0.23	0.17	0.16	0.1	0.06	0.21	0.18
CG10752	3112948998	643	brk	Dict	0.6756				0.23	0.77	0.25	0.5	0.11	0.919	0.718	0.886	0.323	0.914	0.651	0.937	0.802	0.946	0.885	2.1159	0.0972892	0.925	0.152	0.883	0.152	0.916	0.152	0.939	0.152	0.957	0.152	0.69	0.71	0.37	0.36	0.24	0.17	0.03	0.08	0.36	0.33
CG10752	3112948998	643	bun	Dict	0.6099				0.18	0.78	0.06	0.17	0.19	0.885	0.664	0.841	0.31	0.875	0.609	0.91	0.742	0.935	0.885	0.7822	0.0972892	0.887	0.152	0.834	0.152	0.874	0.152	0.905	0.152	0.925	0.152	0.54	0.52	0.04	0.14	0.61	0.58	0.13	0.22	0.05	0.09
CG10752	3112948998	643	bx	Dict	0.7472		*		0.2	0.83	0.2	0.29	0.05	0.899	0.714	0.867	0.309	0.895	0.651	0.907	0.792	0.914	0.858	1.1999	0.0972892	0.901	0.152	0.863	0.152	0.894	0.152	0.918	0.152	0.934	0.152	0.79	0.8	0.29	0.26	0.25	0.22	0.02	0.06	0.34	0.32
CG10752	3112948998	643	cv2	Dict	0.5152				0.56	0.49	0.08	0.38	0.25	0.87	0.685	0.828	0.295	0.86	0.6	0.893	0.763	0.898	0.844	0.5685	0.0972892	0.859	0.152	0.814	0.152	0.85	0.152	0.878	0.152	0.914	0.152	0.31	0.35	0.38	0.43	0.3	0.25	0.13	0.11	0.62	0.59
CG10752	3112948998	643	dad	Dict	0.5085				0.6	0.35	0.36	0.11	0.33	0.869	0.651	0.825	0.301	0.858	0.591	0.884	0.743	0.901	0.864	0.3276	0.0972892	0.857	0.152	0.812	0.152	0.849	0.152	0.877	0.152	0.897	0.152	0.02	0.03	0.18	0.36	0.74	0.69	0.29	0.21	0.1	0.04
CG10752	3112948998	643	dll	Dict	0.6491				0.22	0.84	0.07	0.09	0.13	0.893	0.691	0.855	0.319	0.882	0.626	0.902	0.775	0.916	0.881	0.8412	0.0972892	0.894	0.152	0.854	0.152	0.885	0.152	0.911	0.152	0.924	0.152	0.68	0.66	0.07	0.15	0.59	0.59	0.03	0.11	0.06	0.04
CG10752	3112948998	643	dlp	Dict	0.5552				0.22	0.56	0.21	0.39	0.18	0.845	0.586	0.784	0.258	0.829	0.528	0.86	0.691	0.881	0.769	0.9958	0.0972892	0.815	0.152	0.755	0.152	0.8	0.152	0.84	0.152	0.86	0.152	0.56	0.54	0.26	0.3	0.02	0.14	0.16	0.13	0.33	0.32
CG10752	3112948998	643	dpp	Dict	0.7188		*		0.44	0.75	0.19	0.01	0.02	0.891	0.7	0.852	0.316	0.883	0.644	0.907	0.794	0.913	0.856	0.4649	0.0972892	0.891	0.152	0.853	0.152	0.884	0.152	0.902	0.152	0.92	0.152	0.58	0.59	0.35	0.4	0.49	0.42	0.15	0.2	0.22	0.21
CG10752	3112948998	643	ds	Dict	0.5319				0.39	0.84	0.12	0.23	0.09	0.937	0.759	0.903	0.356	0.929	0.684	0.943	0.852	0.947	0.903	5.7655	0.0972892	0.932	0.152	0.898	0.152	0.925	0.152	0.944	0.152	0.956	0.152	0.89	0.85	0.21	0.26	0.14	0.21	0.26	0.31	0.22	0.21
CG10752	3112948998	643	ex	Dict	0.5258				0.04	0.82	0.43	0.12	0.04	0.914	0.73	0.883	0.322	0.91	0.661	0.92	0.832	0.947	0.875	5.4462	0.0972892	0.918	0.152	0.88	0.152	0.909	0.152	0.929	0.152	0.944	0.152	0.82	0.81	0.21	0.17	0.21	0.15	0.42	0.47	0.01	0.01
CG10752	3112948998	643	fz	Dict	0.6005				0.06	0.7	0.17	0.26	0.24	0.85	0.643	0.804	0.281	0.839	0.574	0.861	0.74	0.866	0.798	0.4509	0.0972892	0.841	0.152	0.79	0.152	0.826	0.152	0.861	0.152	0.882	0.152	0.77	0.78	0.15	0.08	0.06	0.08	0.02	0.03	0.39	0.4
CG10752	3112948998	643	inr	Dict	0.6673		**		0.32	0.49	0.12	0.08	0.29	0.794	0.561	0.744	0.24	0.782	0.496	0.807	0.653	0.838	0.701	0.5695	0.0972892	0.795	0.152	0.731	0.152	0.778	0.152	0.824	0.152	0.855	0.152	0.33	0.36	0.37	0.42	0.41	0.3	0.06	0.11	0.09	0.12
CG10752	3112948998	643	kay	Dict	0.5419				0.28	0.64	0.08	0.07	0.3	0.825	0.609	0.772	0.243	0.814	0.538	0.851	0.678	0.862	0.785	0.4534	0.0972892	0.821	0.152	0.767	0.152	0.806	0.152	0.839	0.152	0.857	0.152	0.47	0.49	0.19	0.23	0.32	0.32	0.18	0.13	0.28	0.24
CG10752	3112948998	643	luna	Dict	0.6288				0.18	0.75	0.2	0.38	0.08	0.869	0.647	0.82	0.292	0.86	0.599	0.88	0.733	0.882	0.805	0.3695	0.0972892	0.861	0.152	0.819	0.152	0.852	0.152	0.879	0.152	0.903	0.152	0.62	0.62	0.08	0.12	0.38	0.41	0.28	0.2	0.3	0.25
CG10752	3112948998	643	mpk2	Dict	0.5464				0.18	0.68	0.09	0.37	0.15	0.846	0.633	0.806	0.278	0.839	0.57	0.862	0.742	0.889	0.829	0.4463	0.0972892	0.849	0.152	0.797	0.152	0.837	0.152	0.878	0.152	0.903	0.152	0.61	0.59	0.05	0.06	0.23	0.26	0.05	0.09	0.59	0.58
CG10752	3112948998	643	nmo	Dict	0.5469				0.31	0.81	0.35	0.29	0.15	0.94	0.734	0.907	0.346	0.934	0.656	0.96	0.831	0.961	0.909	2.0873	0.0972892	0.938	0.152	0.902	0.152	0.931	0.152	0.953	0.152	0.963	0.152	0.92	0.92	0.07	0.06	0.16	0.13	0.17	0.2	0.2	0.2
CG10752	3112948998	643	pnt	Dict	0.6387				0.28	0.69	0.03	0.39	0.09	0.858	0.653	0.816	0.281	0.853	0.584	0.873	0.772	0.886	0.829	0.9325	0.0972892	0.843	0.152	0.802	0.152	0.836	0.152	0.865	0.152	0.891	0.152	0.52	0.53	0.21	0.26	0.4	0.37	0.11	0.04	0.34	0.29
CG10752	3112948998	643	sav	Dict	0.5778				0.34	0.81	0.01	0.18	0.13	0.914	0.732	0.873	0.328	0.904	0.656	0.928	0.795	0.931	0.931	0.5947	0.0972892	0.909	0.152	0.868	0.152	0.902	0.152	0.929	0.152	0.952	0.152	0.58	0.56	0.05	0.15	0.59	0.59	0.16	0.23	0.3	0.28
CG10752	3112948998	643	ser	Dict	0.6681				0.11	0.78	0.3	0.27	0.16	0.893	0.688	0.842	0.31	0.879	0.621	0.905	0.793	0.918	0.869	0.4217	0.0972892	0.876	0.152	0.833	0.152	0.868	0.152	0.891	0.152	0.919	0.152	0.69	0.66	0.2	0.16	0.36	0.45	0.2	0.11	0.1	0.06
CG10752	3112948998	643	shn	Dict	0.5194				0.07	0.42	0.09	0.6	0.08	0.789	0.552	0.733	0.222	0.78	0.475	0.812	0.651	0.824	0.737	0.7674	0.0972892	0.779	0.152	0.71	0.152	0.762	0.152	0.81	0.152	0.865	0.152	0.35	0.37	0.05	0.03	0.05	0.08	0.21	0.19	0.46	0.41
CG10752	3112948998	643	sls	Dict	0.5412				0.72	0.33	0.05	0.14	0.22	0.84	0.68	0.801	0.314	0.832	0.622	0.857	0.744	0.874	0.801	0.5182	0.0972892	0.839	0.152	0.799	0.152	0.832	0.152	0.859	0.152	0.883	0.152	0.03	0.07	0.46	0.61	0.64	0.52	0.12	0.06	0.21	0.16
CG10804	1003376197	11	bs	Dict	0.5238		*		0.13	0.12	0.59	0.11	0.19	0.743	0.496	0.681	0.214	0.727	0.45	0.75	0.598	0.783	0.667	0.4761	0.445404	0.731	0.152	0.674	0.152	0.719	0.152	0.753	0.152	0.785	0.152	0.05	0.08	0.32	0.29	0.1	0.22	0.53	0.5	0.19	0.2
CG10804	1003376197	11	dad	Dict	0.549				0.6	0.35	0.36	0.11	0.33	0.869	0.651	0.825	0.301	0.858	0.591	0.884	0.743	0.901	0.864	0.3276	0.445404	0.857	0.152	0.812	0.152	0.849	0.152	0.877	0.152	0.897	0.152	0.02	0.03	0.18	0.36	0.74	0.69	0.29	0.21	0.1	0.04
CG10804	1003376197	11	inv	Dict	0.5731		*		0.21	0.21	0.49	0.43	0.37	0.794	0.541	0.743	0.234	0.786	0.48	0.811	0.656	0.863	0.766	0.3255	0.445404	0.798	0.152	0.739	0.152	0.786	0.152	0.826	0.152	0.867	0.152	0.3	0.27	0.03	0.1	0.19	0.2	0.61	0.57	0.04	0.1
CG10804	1003376197	11	kni	Dict	0.5936		*		0.08	0.39	0.31	0.54	0.03	0.798	0.528	0.732	0.217	0.778	0.462	0.84	0.638	0.859	0.778	0.3592	0.445404	0.808	0.152	0.738	0.152	0.795	0.152	0.832	0.152	0.852	0.152	0.34	0.32	0.13	0.12	0.16	0.25	0.41	0.36	0.44	0.41
CG10804	1003376197	11	luna	Dict	0.6408				0.18	0.75	0.2	0.38	0.08	0.869	0.647	0.82	0.292	0.86	0.599	0.88	0.733	0.882	0.805	0.3695	0.445404	0.861	0.152	0.819	0.152	0.852	0.152	0.879	0.152	0.903	0.152	0.62	0.62	0.08	0.12	0.38	0.41	0.28	0.2	0.3	0.25
CG10804	1003376197	11	med	Dict	0.5996				0.17	0.63	0.24	0.37	0.19	0.855	0.625	0.8	0.281	0.843	0.558	0.875	0.718	0.896	0.847	0.768	0.445404	0.84	0.152	0.789	0.152	0.828	0.152	0.862	0.152	0.893	0.152	0.54	0.51	0.21	0.19	0.24	0.32	0.14	0.06	0.15	0.1
CG10804	1003376197	11	os	Dict	0.6668		*		0.36	0.12	0.65	0.28	0	0.816	0.603	0.775	0.255	0.808	0.547	0.844	0.699	0.858	0.789	0.2858	0.445404	0.823	0.152	0.777	0.152	0.814	0.152	0.838	0.152	0.855	0.152	0.09	0.09	0.09	0.04	0.44	0.5	0.58	0.54	0.23	0.18
CG10804	1003376197	11	rpt1	Dict	0.6041		*		0.04	0.25	0.66	0.15	0.07	0.793	0.555	0.721	0.245	0.77	0.503	0.816	0.623	0.817	0.725	0.264	0.445404	0.775	0.152	0.72	0.152	0.763	0.152	0.791	0.152	0.839	0.152	0.12	0.08	0.45	0.35	0.32	0.47	0.36	0.32	0.25	0.23
CG10804	1003376197	11	sd	Dict	0.6397				0.34	0.63	0.37	0.24	0.02	0.856	0.667	0.823	0.286	0.851	0.597	0.87	0.767	0.871	0.849	5.3633	0.445404	0.87	0.152	0.824	0.152	0.861	0.152	0.885	0.152	0.905	0.152	0.7	0.64	0.42	0.45	0.08	0.25	0.3	0.25	0.11	0.09
CG10804	1003376197	11	ser	Dict	0.6493				0.11	0.78	0.3	0.27	0.16	0.893	0.688	0.842	0.31	0.879	0.621	0.905	0.793	0.918	0.869	0.4217	0.445404	0.876	0.152	0.833	0.152	0.868	0.152	0.891	0.152	0.919	0.152	0.69	0.66	0.2	0.16	0.36	0.45	0.2	0.11	0.1	0.06
CG10804	1003376197	11	ubx	Dict	0.6474				0.45	0.7	0.38	0.06	0.15	0.916	0.737	0.881	0.325	0.908	0.669	0.924	0.823	0.952	0.891	0.6049	0.445404	0.91	0.152	0.876	0.152	0.902	0.152	0.929	0.152	0.943	0.152	0.74	0.7	0.38	0.42	0.12	0.27	0.29	0.22	0.23	0.25
CG10804	1003376197	11	yki	Dict	0.5203		*		0.25	0.37	0.29	0.38	0.05	0.708	0.492	0.653	0.208	0.693	0.424	0.741	0.58	0.745	0.684	1.8695	0.445404	0.696	0.152	0.646	0.152	0.684	0.152	0.734	0.152	0.761	0.152	0.39	0.36	0.27	0.29	0	0.11	0.27	0.24	0.18	0.15
CG10920	1007747354	34	bx	Dict	0.549				0.2	0.83	0.2	0.29	0.05	0.899	0.714	0.867	0.309	0.895	0.651	0.907	0.792	0.914	0.858	1.1999	0.189386	0.901	0.152	0.863	0.152	0.894	0.152	0.918	0.152	0.934	0.152	0.79	0.8	0.29	0.26	0.25	0.22	0.02	0.06	0.34	0.32
CG10920	1007747354	34	dgo	Dict	0.5337				0.31	0.6	0.04	0.22	0.16	0.815	0.614	0.762	0.276	0.801	0.553	0.832	0.684	0.856	0.801	0.4284	0.189386	0.789	0.152	0.742	0.152	0.777	0.152	0.819	0.152	0.84	0.152	0.66	0.61	0.24	0.26	0.17	0.23	0.22	0.26	0.23	0.21
CG10920	1007747354	34	ds	Dict	0.723				0.39	0.84	0.12	0.23	0.09	0.937	0.759	0.903	0.356	0.929	0.684	0.943	0.852	0.947	0.903	5.7655	0.189386	0.932	0.152	0.898	0.152	0.925	0.152	0.944	0.152	0.956	0.152	0.89	0.85	0.21	0.26	0.14	0.21	0.26	0.31	0.22	0.21
CG10920	1007747354	34	dsh	Dict	0.5773				0.68	0.51	0.24	0.14	0.1	0.91	0.72	0.873	0.33	0.9	0.649	0.92	0.793	0.934	0.84	1.1394	0.189386	0.91	0.152	0.871	0.152	0.9	0.152	0.923	0.152	0.937	0.152	0.68	0.66	0.19	0.35	0.33	0.27	0.26	0.26	0.32	0.3
CG10920	1007747354	34	ex	Dict	0.6731				0.04	0.82	0.43	0.12	0.04	0.914	0.73	0.883	0.322	0.91	0.661	0.92	0.832	0.947	0.875	5.4462	0.189386	0.918	0.152	0.88	0.152	0.909	0.152	0.929	0.152	0.944	0.152	0.82	0.81	0.21	0.17	0.21	0.15	0.42	0.47	0.01	0.01
CG10920	1007747354	34	fj	Dict	0.5752				0.84	0.35	0.16	0.16	0.06	0.938	0.763	0.909	0.355	0.932	0.705	0.952	0.857	0.956	0.929	2.0627	0.189386	0.928	0.152	0.894	0.152	0.921	0.152	0.941	0.152	0.953	0.152	0.59	0.54	0.46	0.61	0.39	0.27	0.29	0.29	0.37	0.34
CG10920	1007747354	34	ft	Dict	0.6387				0.39	0.75	0.08	0.35	0.1	0.927	0.72	0.889	0.323	0.919	0.649	0.933	0.808	0.941	0.888	4.3023	0.189386	0.916	0.152	0.877	0.152	0.907	0.152	0.938	0.152	0.95	0.152	0.77	0.7	0.42	0.43	0.25	0.36	0.22	0.28	0.21	0.2
CG10920	1007747354	34	fz	Dict	0.6314				0.06	0.7	0.17	0.26	0.24	0.85	0.643	0.804	0.281	0.839	0.574	0.861	0.74	0.866	0.798	0.4509	0.189386	0.841	0.152	0.79	0.152	0.826	0.152	0.861	0.152	0.882	0.152	0.77	0.78	0.15	0.08	0.06	0.08	0.02	0.03	0.39	0.4
CG10920	1007747354	34	lea	Dict	0.5458		*		0.06	0.56	0.09	0.04	0.24	0.714	0.505	0.665	0.233	0.706	0.452	0.734	0.592	0.736	0.647	0.2912	0.189386	0.723	0.152	0.659	0.152	0.704	0.152	0.756	0.152	0.813	0.152	0.53	0.51	0.06	0.06	0.18	0.24	0.1	0.06	0.28	0.28
CG10920	1007747354	34	mats	Dict	0.6937		*		0.58	0.58	0.2	0.15	0.19	0.892	0.685	0.853	0.318	0.882	0.628	0.899	0.766	0.9	0.866	3.5887	0.189386	0.884	0.152	0.843	0.152	0.875	0.152	0.897	0.152	0.918	0.152	0.72	0.65	0.54	0.62	0.07	0.12	0.01	0.04	0.07	0.04
CG10920	1007747354	34	mpk2	Dict	0.5847				0.18	0.68	0.09	0.37	0.15	0.846	0.633	0.806	0.278	0.839	0.57	0.862	0.742	0.889	0.829	0.4463	0.189386	0.849	0.152	0.797	0.152	0.837	0.152	0.878	0.152	0.903	0.152	0.61	0.59	0.05	0.06	0.23	0.26	0.05	0.09	0.59	0.58
CG10920	1007747354	34	nmo	Dict	0.8089		*		0.31	0.81	0.35	0.29	0.15	0.94	0.734	0.907	0.346	0.934	0.656	0.96	0.831	0.961	0.909	2.0873	0.189386	0.938	0.152	0.902	0.152	0.931	0.152	0.953	0.152	0.963	0.152	0.92	0.92	0.07	0.06	0.16	0.13	0.17	0.2	0.2	0.2
CG10920	1007747354	34	sav	Dict	0.505				0.34	0.81	0.01	0.18	0.13	0.914	0.732	0.873	0.328	0.904	0.656	0.928	0.795	0.931	0.931	0.5947	0.189386	0.909	0.152	0.868	0.152	0.902	0.152	0.929	0.152	0.952	0.152	0.58	0.56	0.05	0.15	0.59	0.59	0.16	0.23	0.3	0.28
CG10920	1007747354	34	sd	Dict	0.6334				0.34	0.63	0.37	0.24	0.02	0.856	0.667	0.823	0.286	0.851	0.597	0.87	0.767	0.871	0.849	5.3633	0.189386	0.87	0.152	0.824	0.152	0.861	0.152	0.885	0.152	0.905	0.152	0.7	0.64	0.42	0.45	0.08	0.25	0.3	0.25	0.11	0.09
CG10920	1007747354	34	spi	Dict	0.5689				0.23	0.37	0.57	0.11	0.37	0.827	0.601	0.778	0.242	0.821	0.54	0.837	0.698	0.84	0.809	0.4719	0.189386	0.83	0.152	0.779	0.152	0.818	0.152	0.856	0.152	0.893	0.152	0.4	0.43	0.43	0.36	0.07	0.16	0.33	0.31	0.43	0.45
CG10920	1007747354	34	stan	Dict	0.5121				0.2	0.44	0.52	0.16	0.03	0.797	0.577	0.744	0.261	0.787	0.515	0.815	0.663	0.834	0.797	0.2999	0.189386	0.795	0.152	0.741	0.152	0.785	0.152	0.827	0.152	0.875	0.152	0.48	0.46	0.11	0.04	0.08	0.12	0.49	0.5	0.04	0.02
CG10920	1007747354	34	stg	Dict	0.5278				0.25	0.54	0.35	0.48	0.09	0.864	0.657	0.816	0.263	0.854	0.585	0.882	0.756	0.884	0.858	1.0297	0.189386	0.866	0.152	0.81	0.152	0.852	0.152	0.889	0.152	0.914	0.152	0.63	0.59	0.01	0.07	0.07	0.06	0.41	0.44	0.37	0.33
CG10920	1007747354	34	tmod	Dict	0.5198				0.2	0.49	0.1	0.6	0.13	0.821	0.592	0.765	0.243	0.814	0.518	0.84	0.668	0.868	0.753	0.6584	0.189386	0.822	0.152	0.761	0.152	0.81	0.152	0.852	0.152	0.876	0.152	0.57	0.56	0.02	0.09	0.05	0.01	0.01	0.04	0.36	0.34
CG10920	1007747354	34	tx	Dict	0.615				0.06	0.74	0.53	0.01	0.18	0.914	0.73	0.868	0.33	0.9	0.655	0.928	0.801	0.928	0.839	0.9684	0.189386	0.903	0.152	0.866	0.152	0.895	0.152	0.917	0.152	0.929	0.152	0.74	0.75	0.23	0.15	0.01	0.04	0.43	0.45	0.19	0.2
CG10920	1007747354	34	wg	Dict	0.5801		*		0.35	0.58	0.01	0.12	0.19	0.778	0.575	0.724	0.25	0.762	0.522	0.796	0.661	0.804	0.737	1.6659	0.189386	0.776	0.152	0.726	0.152	0.764	0.152	0.798	0.152	0.846	0.152	0.62	0.59	0.24	0.31	0.06	0.04	0.13	0.15	0.18	0.17
CG10920	1007747354	34	wts	Dict	0.8144		**		0.36	0.69	0.38	0.08	0.22	0.894	0.718	0.857	0.324	0.886	0.645	0.917	0.809	0.926	0.882	0.9344	0.189386	0.887	0.152	0.845	0.152	0.877	0.152	0.901	0.152	0.918	0.152	0.79	0.77	0.09	0.2	0.16	0.12	0.41	0.42	0.22	0.24
CG11030	2105730070	168	aret	Dict	0.7822		**		0.66	0.06	0.37	0.12	0	0.844	0.652	0.797	0.293	0.836	0.595	0.861	0.737	0.868	0.861	0.4688	0.352423	0.843	0.152	0.795	0.152	0.833	0.152	0.863	0.152	0.885	0.152	0.22	0.23	0.02	0.18	0.65	0.65	0.14	0.1	0.52	0.5
CG11030	2105730070	168	bsk	Dict	0.5038				0.12	0.05	0.62	0.23	0.07	0.742	0.522	0.689	0.218	0.733	0.458	0.75	0.61	0.791	0.715	0.6289	0.352423	0.771	0.152	0.715	0.152	0.759	0.152	0.802	0.152	0.862	0.152	0.22	0.28	0.54	0.4	0.36	0.51	0.22	0.19	0.51	0.49
CG11030	2105730070	168	btd	Dict	0.5148				0.83	0.17	0.22	0.01	0.09	0.891	0.703	0.854	0.334	0.882	0.638	0.904	0.803	0.91	0.863	0.5246	0.352423	0.889	0.152	0.851	0.152	0.882	0.152	0.899	0.152	0.921	0.152	0.06	0.02	0.53	0.66	0.51	0.36	0.14	0.16	0.45	0.44
CG11030	2105730070	168	cg8654	Dict	0.6086		*		0.63	0.1	0.2	0.08	0.1	0.738	0.574	0.696	0.263	0.73	0.517	0.775	0.637	0.797	0.705	0.4142	0.352423	0.749	0.152	0.7	0.152	0.738	0.152	0.77	0.152	0.818	0.152	0.14	0.12	0.15	0.3	0.49	0.46	0.09	0.08	0.45	0.44
CG11030	2105730070	168	dad	Dict	0.6639		*		0.6	0.35	0.36	0.11	0.33	0.869	0.651	0.825	0.301	0.858	0.591	0.884	0.743	0.901	0.864	0.3276	0.352423	0.857	0.152	0.812	0.152	0.849	0.152	0.877	0.152	0.897	0.152	0.02	0.03	0.18	0.36	0.74	0.69	0.29	0.21	0.1	0.04
CG11030	2105730070	168	dsh	Dict	0.6725				0.68	0.51	0.24	0.14	0.1	0.91	0.72	0.873	0.33	0.9	0.649	0.92	0.793	0.934	0.84	1.1394	0.352423	0.91	0.152	0.871	0.152	0.9	0.152	0.923	0.152	0.937	0.152	0.68	0.66	0.19	0.35	0.33	0.27	0.26	0.26	0.32	0.3
CG11030	2105730070	168	egfr	Dict	0.5903				0.7	0.16	0.09	0.25	0.03	0.856	0.625	0.805	0.283	0.849	0.568	0.871	0.727	0.881	0.797	0.9394	0.352423	0.846	0.152	0.794	0.152	0.834	0.152	0.864	0.152	0.892	0.152	0.11	0.12	0.18	0.37	0.69	0.62	0.11	0.15	0.33	0.32
CG11030	2105730070	168	en	Dict	0.5359		*		0.37	0.07	0.27	0.41	0.01	0.759	0.502	0.689	0.208	0.742	0.439	0.788	0.612	0.794	0.771	0.7048	0.352423	0.751	0.152	0.684	0.152	0.734	0.152	0.77	0.152	0.806	0.152	0.05	0.06	0.01	0.1	0.29	0.31	0.28	0.26	0.51	0.48
CG11030	2105730070	168	fj	Dict	0.6459				0.84	0.35	0.16	0.16	0.06	0.938	0.763	0.909	0.355	0.932	0.705	0.952	0.857	0.956	0.929	2.0627	0.352423	0.928	0.152	0.894	0.152	0.921	0.152	0.941	0.152	0.953	0.152	0.59	0.54	0.46	0.61	0.39	0.27	0.29	0.29	0.37	0.34
CG11030	2105730070	168	inv	Dict	0.5033				0.21	0.21	0.49	0.43	0.37	0.794	0.541	0.743	0.234	0.786	0.48	0.811	0.656	0.863	0.766	0.3255	0.352423	0.798	0.152	0.739	0.152	0.786	0.152	0.826	0.152	0.867	0.152	0.3	0.27	0.03	0.1	0.19	0.2	0.61	0.57	0.04	0.1
CG11030	2105730070	168	mad	Dict	0.7383		*		0.84	0.08	0.2	0.2	0.07	0.894	0.724	0.866	0.359	0.887	0.661	0.91	0.811	0.922	0.847	0.5446	0.352423	0.889	0.152	0.854	0.152	0.881	0.152	0.901	0.152	0.907	0.152	0.2	0.16	0.38	0.54	0.57	0.49	0.28	0.25	0.5	0.46
CG11030	2105730070	168	os	Dict	0.6479		*		0.36	0.12	0.65	0.28	0	0.816	0.603	0.775	0.255	0.808	0.547	0.844	0.699	0.858	0.789	0.2858	0.352423	0.823	0.152	0.777	0.152	0.814	0.152	0.838	0.152	0.855	0.152	0.09	0.09	0.09	0.04	0.44	0.5	0.58	0.54	0.23	0.18
CG11030	2105730070	168	ptc	Dict	0.5595				0.6	0.19	0.19	0.05	0.47	0.847	0.608	0.783	0.28	0.832	0.556	0.855	0.7	0.862	0.784	1.9546	0.352423	0.831	0.152	0.769	0.152	0.813	0.152	0.863	0.152	0.884	0.152	0.46	0.46	0.19	0.39	0.58	0.48	0.06	0.01	0.05	0.01
CG11030	2105730070	168	sls	Dict	0.5772				0.72	0.33	0.05	0.14	0.22	0.84	0.68	0.801	0.314	0.832	0.622	0.857	0.744	0.874	0.801	0.5182	0.352423	0.839	0.152	0.799	0.152	0.832	0.152	0.859	0.152	0.883	0.152	0.03	0.07	0.46	0.61	0.64	0.52	0.12	0.06	0.21	0.16
CG11030	2105730070	168	socs36e	Dict	0.8204		**		0.74	0.08	0.47	0.09	0.11	0.886	0.717	0.854	0.333	0.88	0.654	0.898	0.808	0.901	0.891	0.4292	0.352423	0.88	0.152	0.846	0.152	0.872	0.152	0.895	0.152	0.911	0.152	0.19	0.17	0.15	0.33	0.64	0.63	0.43	0.39	0.26	0.24
CG11030	2105730070	168	sog	Dict	0.605		*		0.53	0.17	0.36	0.18	0.04	0.794	0.601	0.737	0.279	0.78	0.545	0.816	0.693	0.827	0.806	0.8503	0.352423	0.793	0.152	0.735	0.152	0.778	0.152	0.817	0.152	0.858	0.152	0.13	0.17	0.18	0.03	0.7	0.73	0.04	0.09	0.43	0.41
CG11030	2105730070	168	tango14	Dict	0.6912				0.87	0.17	0.08	0.09	0.3	0.899	0.736	0.871	0.356	0.894	0.669	0.914	0.821	0.916	0.86	1.4426	0.352423	0.909	0.152	0.875	0.152	0.902	0.152	0.923	0.152	0.932	0.152	0.16	0.13	0.48	0.67	0.77	0.62	0.08	0.02	0.09	0.05
CG1105	3202859261	749	ap	Dict	0.7938		**		0.13	0.81	0.11	0.15	0.22	0.856	0.666	0.815	0.299	0.847	0.607	0.87	0.745	0.871	0.826	0.394	0.59165	0.86	0.152	0.82	0.152	0.852	0.152	0.875	0.152	0.892	0.152	0.74	0.76	0.27	0.23	0.17	0.16	0.1	0.06	0.21	0.18
CG1105	3202859269	749	ap	Dict	0.7938		**		0.13	0.81	0.11	0.15	0.22	0.856	0.666	0.815	0.299	0.847	0.607	0.87	0.745	0.871	0.826	0.394	0.59165	0.86	0.152	0.82	0.152	0.852	0.152	0.875	0.152	0.892	0.152	0.74	0.76	0.27	0.23	0.17	0.16	0.1	0.06	0.21	0.18
CG1105	3202859261	749	brk	Dict	0.6754				0.23	0.77	0.25	0.5	0.11	0.919	0.718	0.886	0.323	0.914	0.651	0.937	0.802	0.946	0.885	2.1159	0.59165	0.925	0.152	0.883	0.152	0.916	0.152	0.939	0.152	0.957	0.152	0.69	0.71	0.37	0.36	0.24	0.17	0.03	0.08	0.36	0.33
CG1105	3202859269	749	brk	Dict	0.6754				0.23	0.77	0.25	0.5	0.11	0.919	0.718	0.886	0.323	0.914	0.651	0.937	0.802	0.946	0.885	2.1159	0.59165	0.925	0.152	0.883	0.152	0.916	0.152	0.939	0.152	0.957	0.152	0.69	0.71	0.37	0.36	0.24	0.17	0.03	0.08	0.36	0.33
CG1105	3202859261	749	bun	Dict	0.6885		*		0.18	0.78	0.06	0.17	0.19	0.885	0.664	0.841	0.31	0.875	0.609	0.91	0.742	0.935	0.885	0.7822	0.59165	0.887	0.152	0.834	0.152	0.874	0.152	0.905	0.152	0.925	0.152	0.54	0.52	0.04	0.14	0.61	0.58	0.13	0.22	0.05	0.09
CG1105	3202859269	749	bun	Dict	0.6885		*		0.18	0.78	0.06	0.17	0.19	0.885	0.664	0.841	0.31	0.875	0.609	0.91	0.742	0.935	0.885	0.7822	0.59165	0.887	0.152	0.834	0.152	0.874	0.152	0.905	0.152	0.925	0.152	0.54	0.52	0.04	0.14	0.61	0.58	0.13	0.22	0.05	0.09
CG1105	3202859261	749	bx	Dict	0.7245		*		0.2	0.83	0.2	0.29	0.05	0.899	0.714	0.867	0.309	0.895	0.651	0.907	0.792	0.914	0.858	1.1999	0.59165	0.901	0.152	0.863	0.152	0.894	0.152	0.918	0.152	0.934	0.152	0.79	0.8	0.29	0.26	0.25	0.22	0.02	0.06	0.34	0.32
CG1105	3202859269	749	bx	Dict	0.7245		*		0.2	0.83	0.2	0.29	0.05	0.899	0.714	0.867	0.309	0.895	0.651	0.907	0.792	0.914	0.858	1.1999	0.59165	0.901	0.152	0.863	0.152	0.894	0.152	0.918	0.152	0.934	0.152	0.79	0.8	0.29	0.26	0.25	0.22	0.02	0.06	0.34	0.32
CG1105	3202859261	749	dll	Dict	0.6377				0.22	0.84	0.07	0.09	0.13	0.893	0.691	0.855	0.319	0.882	0.626	0.902	0.775	0.916	0.881	0.8412	0.59165	0.894	0.152	0.854	0.152	0.885	0.152	0.911	0.152	0.924	0.152	0.68	0.66	0.07	0.15	0.59	0.59	0.03	0.11	0.06	0.04
CG1105	3202859269	749	dll	Dict	0.6377				0.22	0.84	0.07	0.09	0.13	0.893	0.691	0.855	0.319	0.882	0.626	0.902	0.775	0.916	0.881	0.8412	0.59165	0.894	0.152	0.854	0.152	0.885	0.152	0.911	0.152	0.924	0.152	0.68	0.66	0.07	0.15	0.59	0.59	0.03	0.11	0.06	0.04
CG1105	3202859261	749	dlp	Dict	0.7111		**		0.22	0.56	0.21	0.39	0.18	0.845	0.586	0.784	0.258	0.829	0.528	0.86	0.691	0.881	0.769	0.9958	0.59165	0.815	0.152	0.755	0.152	0.8	0.152	0.84	0.152	0.86	0.152	0.56	0.54	0.26	0.3	0.02	0.14	0.16	0.13	0.33	0.32
CG1105	3202859269	749	dlp	Dict	0.7111		**		0.22	0.56	0.21	0.39	0.18	0.845	0.586	0.784	0.258	0.829	0.528	0.86	0.691	0.881	0.769	0.9958	0.59165	0.815	0.152	0.755	0.152	0.8	0.152	0.84	0.152	0.86	0.152	0.56	0.54	0.26	0.3	0.02	0.14	0.16	0.13	0.33	0.32
CG1105	3202859261	749	dpp	Dict	0.5047				0.44	0.75	0.19	0.01	0.02	0.891	0.7	0.852	0.316	0.883	0.644	0.907	0.794	0.913	0.856	0.4649	0.59165	0.891	0.152	0.853	0.152	0.884	0.152	0.902	0.152	0.92	0.152	0.58	0.59	0.35	0.4	0.49	0.42	0.15	0.2	0.22	0.21
CG1105	3202859269	749	dpp	Dict	0.5047				0.44	0.75	0.19	0.01	0.02	0.891	0.7	0.852	0.316	0.883	0.644	0.907	0.794	0.913	0.856	0.4649	0.59165	0.891	0.152	0.853	0.152	0.884	0.152	0.902	0.152	0.92	0.152	0.58	0.59	0.35	0.4	0.49	0.42	0.15	0.2	0.22	0.21
CG1105	3202859261	749	ds	Dict	0.7419				0.39	0.84	0.12	0.23	0.09	0.937	0.759	0.903	0.356	0.929	0.684	0.943	0.852	0.947	0.903	5.7655	0.59165	0.932	0.152	0.898	0.152	0.925	0.152	0.944	0.152	0.956	0.152	0.89	0.85	0.21	0.26	0.14	0.21	0.26	0.31	0.22	0.21
CG1105	3202859269	749	ds	Dict	0.7419				0.39	0.84	0.12	0.23	0.09	0.937	0.759	0.903	0.356	0.929	0.684	0.943	0.852	0.947	0.903	5.7655	0.59165	0.932	0.152	0.898	0.152	0.925	0.152	0.944	0.152	0.956	0.152	0.89	0.85	0.21	0.26	0.14	0.21	0.26	0.31	0.22	0.21
CG1105	3202859261	749	dsh	Dict	0.6133				0.68	0.51	0.24	0.14	0.1	0.91	0.72	0.873	0.33	0.9	0.649	0.92	0.793	0.934	0.84	1.1394	0.59165	0.91	0.152	0.871	0.152	0.9	0.152	0.923	0.152	0.937	0.152	0.68	0.66	0.19	0.35	0.33	0.27	0.26	0.26	0.32	0.3
CG1105	3202859269	749	dsh	Dict	0.6133				0.68	0.51	0.24	0.14	0.1	0.91	0.72	0.873	0.33	0.9	0.649	0.92	0.793	0.934	0.84	1.1394	0.59165	0.91	0.152	0.871	0.152	0.9	0.152	0.923	0.152	0.937	0.152	0.68	0.66	0.19	0.35	0.33	0.27	0.26	0.26	0.32	0.3
CG1105	3202859261	749	ex	Dict	0.6757				0.04	0.82	0.43	0.12	0.04	0.914	0.73	0.883	0.322	0.91	0.661	0.92	0.832	0.947	0.875	5.4462	0.59165	0.918	0.152	0.88	0.152	0.909	0.152	0.929	0.152	0.944	0.152	0.82	0.81	0.21	0.17	0.21	0.15	0.42	0.47	0.01	0.01
CG1105	3202859269	749	ex	Dict	0.6757				0.04	0.82	0.43	0.12	0.04	0.914	0.73	0.883	0.322	0.91	0.661	0.92	0.832	0.947	0.875	5.4462	0.59165	0.918	0.152	0.88	0.152	0.909	0.152	0.929	0.152	0.944	0.152	0.82	0.81	0.21	0.17	0.21	0.15	0.42	0.47	0.01	0.01
CG1105	3202859261	749	ft	Dict	0.6468				0.39	0.75	0.08	0.35	0.1	0.927	0.72	0.889	0.323	0.919	0.649	0.933	0.808	0.941	0.888	4.3023	0.59165	0.916	0.152	0.877	0.152	0.907	0.152	0.938	0.152	0.95	0.152	0.77	0.7	0.42	0.43	0.25	0.36	0.22	0.28	0.21	0.2
CG1105	3202859269	749	ft	Dict	0.6468				0.39	0.75	0.08	0.35	0.1	0.927	0.72	0.889	0.323	0.919	0.649	0.933	0.808	0.941	0.888	4.3023	0.59165	0.916	0.152	0.877	0.152	0.907	0.152	0.938	0.152	0.95	0.152	0.77	0.7	0.42	0.43	0.25	0.36	0.22	0.28	0.21	0.2
CG1105	3202859261	749	fz	Dict	0.6159				0.06	0.7	0.17	0.26	0.24	0.85	0.643	0.804	0.281	0.839	0.574	0.861	0.74	0.866	0.798	0.4509	0.59165	0.841	0.152	0.79	0.152	0.826	0.152	0.861	0.152	0.882	0.152	0.77	0.78	0.15	0.08	0.06	0.08	0.02	0.03	0.39	0.4
CG1105	3202859269	749	fz	Dict	0.6159				0.06	0.7	0.17	0.26	0.24	0.85	0.643	0.804	0.281	0.839	0.574	0.861	0.74	0.866	0.798	0.4509	0.59165	0.841	0.152	0.79	0.152	0.826	0.152	0.861	0.152	0.882	0.152	0.77	0.78	0.15	0.08	0.06	0.08	0.02	0.03	0.39	0.4
CG1105	3202859261	749	kay	Dict	0.648		*		0.28	0.64	0.08	0.07	0.3	0.825	0.609	0.772	0.243	0.814	0.538	0.851	0.678	0.862	0.785	0.4534	0.59165	0.821	0.152	0.767	0.152	0.806	0.152	0.839	0.152	0.857	0.152	0.47	0.49	0.19	0.23	0.32	0.32	0.18	0.13	0.28	0.24
CG1105	3202859269	749	kay	Dict	0.648		*		0.28	0.64	0.08	0.07	0.3	0.825	0.609	0.772	0.243	0.814	0.538	0.851	0.678	0.862	0.785	0.4534	0.59165	0.821	0.152	0.767	0.152	0.806	0.152	0.839	0.152	0.857	0.152	0.47	0.49	0.19	0.23	0.32	0.32	0.18	0.13	0.28	0.24
CG1105	3202859261	749	lea	Dict	0.5527		*		0.06	0.56	0.09	0.04	0.24	0.714	0.505	0.665	0.233	0.706	0.452	0.734	0.592	0.736	0.647	0.2912	0.59165	0.723	0.152	0.659	0.152	0.704	0.152	0.756	0.152	0.813	0.152	0.53	0.51	0.06	0.06	0.18	0.24	0.1	0.06	0.28	0.28
CG1105	3202859269	749	lea	Dict	0.5527		*		0.06	0.56	0.09	0.04	0.24	0.714	0.505	0.665	0.233	0.706	0.452	0.734	0.592	0.736	0.647	0.2912	0.59165	0.723	0.152	0.659	0.152	0.704	0.152	0.756	0.152	0.813	0.152	0.53	0.51	0.06	0.06	0.18	0.24	0.1	0.06	0.28	0.28
CG1105	3202859261	749	luna	Dict	0.7188		*		0.18	0.75	0.2	0.38	0.08	0.869	0.647	0.82	0.292	0.86	0.599	0.88	0.733	0.882	0.805	0.3695	0.59165	0.861	0.152	0.819	0.152	0.852	0.152	0.879	0.152	0.903	0.152	0.62	0.62	0.08	0.12	0.38	0.41	0.28	0.2	0.3	0.25
CG1105	3202859269	749	luna	Dict	0.7188		*		0.18	0.75	0.2	0.38	0.08	0.869	0.647	0.82	0.292	0.86	0.599	0.88	0.733	0.882	0.805	0.3695	0.59165	0.861	0.152	0.819	0.152	0.852	0.152	0.879	0.152	0.903	0.152	0.62	0.62	0.08	0.12	0.38	0.41	0.28	0.2	0.3	0.25
CG1105	3202859261	749	mats	Dict	0.622				0.58	0.58	0.2	0.15	0.19	0.892	0.685	0.853	0.318	0.882	0.628	0.899	0.766	0.9	0.866	3.5887	0.59165	0.884	0.152	0.843	0.152	0.875	0.152	0.897	0.152	0.918	0.152	0.72	0.65	0.54	0.62	0.07	0.12	0.01	0.04	0.07	0.04
CG1105	3202859269	749	mats	Dict	0.622				0.58	0.58	0.2	0.15	0.19	0.892	0.685	0.853	0.318	0.882	0.628	0.899	0.766	0.9	0.866	3.5887	0.59165	0.884	0.152	0.843	0.152	0.875	0.152	0.897	0.152	0.918	0.152	0.72	0.65	0.54	0.62	0.07	0.12	0.01	0.04	0.07	0.04
CG1105	3202859261	749	med	Dict	0.7375		**		0.17	0.63	0.24	0.37	0.19	0.855	0.625	0.8	0.281	0.843	0.558	0.875	0.718	0.896	0.847	0.768	0.59165	0.84	0.152	0.789	0.152	0.828	0.152	0.862	0.152	0.893	0.152	0.54	0.51	0.21	0.19	0.24	0.32	0.14	0.06	0.15	0.1
CG1105	3202859269	749	med	Dict	0.7375		**		0.17	0.63	0.24	0.37	0.19	0.855	0.625	0.8	0.281	0.843	0.558	0.875	0.718	0.896	0.847	0.768	0.59165	0.84	0.152	0.789	0.152	0.828	0.152	0.862	0.152	0.893	0.152	0.54	0.51	0.21	0.19	0.24	0.32	0.14	0.06	0.15	0.1
CG1105	3202859261	749	mpk2	Dict	0.6232				0.18	0.68	0.09	0.37	0.15	0.846	0.633	0.806	0.278	0.839	0.57	0.862	0.742	0.889	0.829	0.4463	0.59165	0.849	0.152	0.797	0.152	0.837	0.152	0.878	0.152	0.903	0.152	0.61	0.59	0.05	0.06	0.23	0.26	0.05	0.09	0.59	0.58
CG1105	3202859269	749	mpk2	Dict	0.6232				0.18	0.68	0.09	0.37	0.15	0.846	0.633	0.806	0.278	0.839	0.57	0.862	0.742	0.889	0.829	0.4463	0.59165	0.849	0.152	0.797	0.152	0.837	0.152	0.878	0.152	0.903	0.152	0.61	0.59	0.05	0.06	0.23	0.26	0.05	0.09	0.59	0.58
CG1105	3202859261	749	nmo	Dict	0.8228		*		0.31	0.81	0.35	0.29	0.15	0.94	0.734	0.907	0.346	0.934	0.656	0.96	0.831	0.961	0.909	2.0873	0.59165	0.938	0.152	0.902	0.152	0.931	0.152	0.953	0.152	0.963	0.152	0.92	0.92	0.07	0.06	0.16	0.13	0.17	0.2	0.2	0.2
CG1105	3202859269	749	nmo	Dict	0.8228		*		0.31	0.81	0.35	0.29	0.15	0.94	0.734	0.907	0.346	0.934	0.656	0.96	0.831	0.961	0.909	2.0873	0.59165	0.938	0.152	0.902	0.152	0.931	0.152	0.953	0.152	0.963	0.152	0.92	0.92	0.07	0.06	0.16	0.13	0.17	0.2	0.2	0.2
CG1105	3202859261	749	pnt	Dict	0.6785		*		0.28	0.69	0.03	0.39	0.09	0.858	0.653	0.816	0.281	0.853	0.584	0.873	0.772	0.886	0.829	0.9325	0.59165	0.843	0.152	0.802	0.152	0.836	0.152	0.865	0.152	0.891	0.152	0.52	0.53	0.21	0.26	0.4	0.37	0.11	0.04	0.34	0.29
CG1105	3202859269	749	pnt	Dict	0.6785		*		0.28	0.69	0.03	0.39	0.09	0.858	0.653	0.816	0.281	0.853	0.584	0.873	0.772	0.886	0.829	0.9325	0.59165	0.843	0.152	0.802	0.152	0.836	0.152	0.865	0.152	0.891	0.152	0.52	0.53	0.21	0.26	0.4	0.37	0.11	0.04	0.34	0.29
CG1105	3202859261	749	sav	Dict	0.6498				0.34	0.81	0.01	0.18	0.13	0.914	0.732	0.873	0.328	0.904	0.656	0.928	0.795	0.931	0.931	0.5947	0.59165	0.909	0.152	0.868	0.152	0.902	0.152	0.929	0.152	0.952	0.152	0.58	0.56	0.05	0.15	0.59	0.59	0.16	0.23	0.3	0.28
CG1105	3202859269	749	sav	Dict	0.6498				0.34	0.81	0.01	0.18	0.13	0.914	0.732	0.873	0.328	0.904	0.656	0.928	0.795	0.931	0.931	0.5947	0.59165	0.909	0.152	0.868	0.152	0.902	0.152	0.929	0.152	0.952	0.152	0.58	0.56	0.05	0.15	0.59	0.59	0.16	0.23	0.3	0.28
CG1105	3202859261	749	sd	Dict	0.6667				0.34	0.63	0.37	0.24	0.02	0.856	0.667	0.823	0.286	0.851	0.597	0.87	0.767	0.871	0.849	5.3633	0.59165	0.87	0.152	0.824	0.152	0.861	0.152	0.885	0.152	0.905	0.152	0.7	0.64	0.42	0.45	0.08	0.25	0.3	0.25	0.11	0.09
CG1105	3202859269	749	sd	Dict	0.6667				0.34	0.63	0.37	0.24	0.02	0.856	0.667	0.823	0.286	0.851	0.597	0.87	0.767	0.871	0.849	5.3633	0.59165	0.87	0.152	0.824	0.152	0.861	0.152	0.885	0.152	0.905	0.152	0.7	0.64	0.42	0.45	0.08	0.25	0.3	0.25	0.11	0.09
CG1105	3202859261	749	ser	Dict	0.8013		**		0.11	0.78	0.3	0.27	0.16	0.893	0.688	0.842	0.31	0.879	0.621	0.905	0.793	0.918	0.869	0.4217	0.59165	0.876	0.152	0.833	0.152	0.868	0.152	0.891	0.152	0.919	0.152	0.69	0.66	0.2	0.16	0.36	0.45	0.2	0.11	0.1	0.06
CG1105	3202859269	749	ser	Dict	0.8013		**		0.11	0.78	0.3	0.27	0.16	0.893	0.688	0.842	0.31	0.879	0.621	0.905	0.793	0.918	0.869	0.4217	0.59165	0.876	0.152	0.833	0.152	0.868	0.152	0.891	0.152	0.919	0.152	0.69	0.66	0.2	0.16	0.36	0.45	0.2	0.11	0.1	0.06
CG1105	3202859261	749	shn	Dict	0.5388				0.07	0.42	0.09	0.6	0.08	0.789	0.552	0.733	0.222	0.78	0.475	0.812	0.651	0.824	0.737	0.7674	0.59165	0.779	0.152	0.71	0.152	0.762	0.152	0.81	0.152	0.865	0.152	0.35	0.37	0.05	0.03	0.05	0.08	0.21	0.19	0.46	0.41
CG1105	3202859269	749	shn	Dict	0.5388				0.07	0.42	0.09	0.6	0.08	0.789	0.552	0.733	0.222	0.78	0.475	0.812	0.651	0.824	0.737	0.7674	0.59165	0.779	0.152	0.71	0.152	0.762	0.152	0.81	0.152	0.865	0.152	0.35	0.37	0.05	0.03	0.05	0.08	0.21	0.19	0.46	0.41
CG1105	3202859261	749	tmod	Dict	0.552				0.2	0.49	0.1	0.6	0.13	0.821	0.592	0.765	0.243	0.814	0.518	0.84	0.668	0.868	0.753	0.6584	0.59165	0.822	0.152	0.761	0.152	0.81	0.152	0.852	0.152	0.876	0.152	0.57	0.56	0.02	0.09	0.05	0.01	0.01	0.04	0.36	0.34
CG1105	3202859269	749	tmod	Dict	0.552				0.2	0.49	0.1	0.6	0.13	0.821	0.592	0.765	0.243	0.814	0.518	0.84	0.668	0.868	0.753	0.6584	0.59165	0.822	0.152	0.761	0.152	0.81	0.152	0.852	0.152	0.876	0.152	0.57	0.56	0.02	0.09	0.05	0.01	0.01	0.04	0.36	0.34
CG1105	3202859261	749	tx	Dict	0.6779				0.06	0.74	0.53	0.01	0.18	0.914	0.73	0.868	0.33	0.9	0.655	0.928	0.801	0.928	0.839	0.9684	0.59165	0.903	0.152	0.866	0.152	0.895	0.152	0.917	0.152	0.929	0.152	0.74	0.75	0.23	0.15	0.01	0.04	0.43	0.45	0.19	0.2
CG1105	3202859269	749	tx	Dict	0.6779				0.06	0.74	0.53	0.01	0.18	0.914	0.73	0.868	0.33	0.9	0.655	0.928	0.801	0.928	0.839	0.9684	0.59165	0.903	0.152	0.866	0.152	0.895	0.152	0.917	0.152	0.929	0.152	0.74	0.75	0.23	0.15	0.01	0.04	0.43	0.45	0.19	0.2
CG1105	3202859261	749	ubx	Dict	0.7745		*		0.45	0.7	0.38	0.06	0.15	0.916	0.737	0.881	0.325	0.908	0.669	0.924	0.823	0.952	0.891	0.6049	0.59165	0.91	0.152	0.876	0.152	0.902	0.152	0.929	0.152	0.943	0.152	0.74	0.7	0.38	0.42	0.12	0.27	0.29	0.22	0.23	0.25
CG1105	3202859269	749	ubx	Dict	0.7745		*		0.45	0.7	0.38	0.06	0.15	0.916	0.737	0.881	0.325	0.908	0.669	0.924	0.823	0.952	0.891	0.6049	0.59165	0.91	0.152	0.876	0.152	0.902	0.152	0.929	0.152	0.943	0.152	0.74	0.7	0.38	0.42	0.12	0.27	0.29	0.22	0.23	0.25
CG1105	3202859261	749	wg	Dict	0.6922		**		0.35	0.58	0.01	0.12	0.19	0.778	0.575	0.724	0.25	0.762	0.522	0.796	0.661	0.804	0.737	1.6659	0.59165	0.776	0.152	0.726	0.152	0.764	0.152	0.798	0.152	0.846	0.152	0.62	0.59	0.24	0.31	0.06	0.04	0.13	0.15	0.18	0.17
CG1105	3202859269	749	wg	Dict	0.6922		**		0.35	0.58	0.01	0.12	0.19	0.778	0.575	0.724	0.25	0.762	0.522	0.796	0.661	0.804	0.737	1.6659	0.59165	0.776	0.152	0.726	0.152	0.764	0.152	0.798	0.152	0.846	0.152	0.62	0.59	0.24	0.31	0.06	0.04	0.13	0.15	0.18	0.17
CG1105	3202859261	749	wts	Dict	0.7051				0.36	0.69	0.38	0.08	0.22	0.894	0.718	0.857	0.324	0.886	0.645	0.917	0.809	0.926	0.882	0.9344	0.59165	0.887	0.152	0.845	0.152	0.877	0.152	0.901	0.152	0.918	0.152	0.79	0.77	0.09	0.2	0.16	0.12	0.41	0.42	0.22	0.24
CG1105	3202859269	749	wts	Dict	0.7051				0.36	0.69	0.38	0.08	0.22	0.894	0.718	0.857	0.324	0.886	0.645	0.917	0.809	0.926	0.882	0.9344	0.59165	0.887	0.152	0.845	0.152	0.877	0.152	0.901	0.152	0.918	0.152	0.79	0.77	0.09	0.2	0.16	0.12	0.41	0.42	0.22	0.24
CG11192	2216253251	409	d	Dict	0.6142		**		0.16	0.46	0.09	0.05	0.56	0.732	0.49	0.664	0.199	0.718	0.433	0.759	0.581	0.795	0.674	0.2325	0.491538	0.728	0.152	0.67	0.152	0.715	0.152	0.75	0.152	0.79	0.152	0.42	0.39	0.05	0.02	0.29	0.29	0.05	0.03	0.37	0.4
CG11192	2216253251	409	ds	Dict	0.5685				0.39	0.84	0.12	0.23	0.09	0.937	0.759	0.903	0.356	0.929	0.684	0.943	0.852	0.947	0.903	5.7655	0.491538	0.932	0.152	0.898	0.152	0.925	0.152	0.944	0.152	0.956	0.152	0.89	0.85	0.21	0.26	0.14	0.21	0.26	0.31	0.22	0.21
CG11192	2216253251	409	fj	Dict	0.5813				0.84	0.35	0.16	0.16	0.06	0.938	0.763	0.909	0.355	0.932	0.705	0.952	0.857	0.956	0.929	2.0627	0.491538	0.928	0.152	0.894	0.152	0.921	0.152	0.941	0.152	0.953	0.152	0.59	0.54	0.46	0.61	0.39	0.27	0.29	0.29	0.37	0.34
CG11192	2216253251	409	ft	Dict	0.5319				0.39	0.75	0.08	0.35	0.1	0.927	0.72	0.889	0.323	0.919	0.649	0.933	0.808	0.941	0.888	4.3023	0.491538	0.916	0.152	0.877	0.152	0.907	0.152	0.938	0.152	0.95	0.152	0.77	0.7	0.42	0.43	0.25	0.36	0.22	0.28	0.21	0.2
CG11192	2216253251	409	kn	Dict	0.5366				0.64	0.28	0.11	0.11	0.28	0.824	0.637	0.777	0.296	0.81	0.565	0.844	0.703	0.867	0.779	0.3931	0.491538	0.815	0.152	0.763	0.152	0.803	0.152	0.833	0.152	0.858	0.152	0.43	0.39	0.35	0.43	0.14	0.05	0.01	0.04	0.51	0.51
CG11192	2216253251	409	stg	Dict	0.5517				0.25	0.54	0.35	0.48	0.09	0.864	0.657	0.816	0.263	0.854	0.585	0.882	0.756	0.884	0.858	1.0297	0.491538	0.866	0.152	0.81	0.152	0.852	0.152	0.889	0.152	0.914	0.152	0.63	0.59	0.01	0.07	0.07	0.06	0.41	0.44	0.37	0.33
CG11241	3122729345	735	cg14147	Dict	0.5207				0.55	0.18	0.24	0.12	0.04	0.733	0.54	0.685	0.256	0.721	0.496	0.752	0.618	0.76	0.693	0.3374	0.045182	0.737	0.152	0.68	0.152	0.721	0.152	0.759	0.152	0.801	0.152	0.38	0.37	0.21	0.34	0.32	0.21	0.4	0.39	0.38	0.38
CG11241	3122729345	735	dlp	Dict	0.7345		**		0.22	0.56	0.21	0.39	0.18	0.845	0.586	0.784	0.258	0.829	0.528	0.86	0.691	0.881	0.769	0.9958	0.045182	0.815	0.152	0.755	0.152	0.8	0.152	0.84	0.152	0.86	0.152	0.56	0.54	0.26	0.3	0.02	0.14	0.16	0.13	0.33	0.32
CG11241	3122729345	735	ds	Dict	0.554				0.39	0.84	0.12	0.23	0.09	0.937	0.759	0.903	0.356	0.929	0.684	0.943	0.852	0.947	0.903	5.7655	0.045182	0.932	0.152	0.898	0.152	0.925	0.152	0.944	0.152	0.956	0.152	0.89	0.85	0.21	0.26	0.14	0.21	0.26	0.31	0.22	0.21
CG11241	3122729345	735	ft	Dict	0.5762				0.39	0.75	0.08	0.35	0.1	0.927	0.72	0.889	0.323	0.919	0.649	0.933	0.808	0.941	0.888	4.3023	0.045182	0.916	0.152	0.877	0.152	0.907	0.152	0.938	0.152	0.95	0.152	0.77	0.7	0.42	0.43	0.25	0.36	0.22	0.28	0.21	0.2
CG11241	3122729345	735	luna	Dict	0.5302				0.18	0.75	0.2	0.38	0.08	0.869	0.647	0.82	0.292	0.86	0.599	0.88	0.733	0.882	0.805	0.3695	0.045182	0.861	0.152	0.819	0.152	0.852	0.152	0.879	0.152	0.903	0.152	0.62	0.62	0.08	0.12	0.38	0.41	0.28	0.2	0.3	0.25
CG11241	3122729345	735	mats	Dict	0.6518				0.58	0.58	0.2	0.15	0.19	0.892	0.685	0.853	0.318	0.882	0.628	0.899	0.766	0.9	0.866	3.5887	0.045182	0.884	0.152	0.843	0.152	0.875	0.152	0.897	0.152	0.918	0.152	0.72	0.65	0.54	0.62	0.07	0.12	0.01	0.04	0.07	0.04
CG11241	3122729345	735	med	Dict	0.6473		*		0.17	0.63	0.24	0.37	0.19	0.855	0.625	0.8	0.281	0.843	0.558	0.875	0.718	0.896	0.847	0.768	0.045182	0.84	0.152	0.789	0.152	0.828	0.152	0.862	0.152	0.893	0.152	0.54	0.51	0.21	0.19	0.24	0.32	0.14	0.06	0.15	0.1
CG11241	3122729345	735	nmo	Dict	0.5084				0.31	0.81	0.35	0.29	0.15	0.94	0.734	0.907	0.346	0.934	0.656	0.96	0.831	0.961	0.909	2.0873	0.045182	0.938	0.152	0.902	0.152	0.931	0.152	0.953	0.152	0.963	0.152	0.92	0.92	0.07	0.06	0.16	0.13	0.17	0.2	0.2	0.2
CG11241	3122729345	735	rpt1	Dict	0.5881		*		0.04	0.25	0.66	0.15	0.07	0.793	0.555	0.721	0.245	0.77	0.503	0.816	0.623	0.817	0.725	0.264	0.045182	0.775	0.152	0.72	0.152	0.763	0.152	0.791	0.152	0.839	0.152	0.12	0.08	0.45	0.35	0.32	0.47	0.36	0.32	0.25	0.23
CG11241	3122729345	735	s6k	Dict	0.5026				0.41	0.16	0.42	0.15	0.43	0.797	0.575	0.75	0.247	0.785	0.514	0.818	0.673	0.836	0.777	0.3905	0.045182	0.79	0.152	0.728	0.152	0.774	0.152	0.814	0.152	0.852	0.152	0.22	0.16	0.48	0.46	0.17	0.29	0.14	0.09	0.47	0.48
CG11241	3122729345	735	sd	Dict	0.7174		*		0.34	0.63	0.37	0.24	0.02	0.856	0.667	0.823	0.286	0.851	0.597	0.87	0.767	0.871	0.849	5.3633	0.045182	0.87	0.152	0.824	0.152	0.861	0.152	0.885	0.152	0.905	0.152	0.7	0.64	0.42	0.45	0.08	0.25	0.3	0.25	0.11	0.09
CG11241	3122729345	735	ser	Dict	0.7608		*		0.11	0.78	0.3	0.27	0.16	0.893	0.688	0.842	0.31	0.879	0.621	0.905	0.793	0.918	0.869	0.4217	0.045182	0.876	0.152	0.833	0.152	0.868	0.152	0.891	0.152	0.919	0.152	0.69	0.66	0.2	0.16	0.36	0.45	0.2	0.11	0.1	0.06
CG11241	3122729345	735	tai	Dict	0.5129				0.71	0.17	0.56	0.09	0.01	0.894	0.73	0.862	0.338	0.889	0.654	0.907	0.805	0.908	0.848	0.4654	0.045182	0.899	0.152	0.868	0.152	0.893	0.152	0.908	0.152	0.921	0.152	0	0.07	0.78	0.84	0.33	0.1	0.31	0.32	0.15	0.14
CG11241	3122729345	735	tmod	Dict	0.5066				0.2	0.49	0.1	0.6	0.13	0.821	0.592	0.765	0.243	0.814	0.518	0.84	0.668	0.868	0.753	0.6584	0.045182	0.822	0.152	0.761	0.152	0.81	0.152	0.852	0.152	0.876	0.152	0.57	0.56	0.02	0.09	0.05	0.01	0.01	0.04	0.36	0.34
CG11241	3122729345	735	ubx	Dict	0.8362		**		0.45	0.7	0.38	0.06	0.15	0.916	0.737	0.881	0.325	0.908	0.669	0.924	0.823	0.952	0.891	0.6049	0.045182	0.91	0.152	0.876	0.152	0.902	0.152	0.929	0.152	0.943	0.152	0.74	0.7	0.38	0.42	0.12	0.27	0.29	0.22	0.23	0.25
CG11241	3122729345	735	wg	Dict	0.5269				0.35	0.58	0.01	0.12	0.19	0.778	0.575	0.724	0.25	0.762	0.522	0.796	0.661	0.804	0.737	1.6659	0.045182	0.776	0.152	0.726	0.152	0.764	0.152	0.798	0.152	0.846	0.152	0.62	0.59	0.24	0.31	0.06	0.04	0.13	0.15	0.18	0.17
CG11241	3122729345	735	yki	Dict	0.5569		*		0.25	0.37	0.29	0.38	0.05	0.708	0.492	0.653	0.208	0.693	0.424	0.741	0.58	0.745	0.684	1.8695	0.045182	0.696	0.152	0.646	0.152	0.684	0.152	0.734	0.152	0.761	0.152	0.39	0.36	0.27	0.29	0	0.11	0.27	0.24	0.18	0.15
CG11313	3226557462	930	dad	Dict	0.5536				0.6	0.35	0.36	0.11	0.33	0.869	0.651	0.825	0.301	0.858	0.591	0.884	0.743	0.901	0.864	0.3276	0.142576	0.857	0.152	0.812	0.152	0.849	0.152	0.877	0.152	0.897	0.152	0.02	0.03	0.18	0.36	0.74	0.69	0.29	0.21	0.1	0.04
CG11313	3226557462	930	dll	Dict	0.5097				0.22	0.84	0.07	0.09	0.13	0.893	0.691	0.855	0.319	0.882	0.626	0.902	0.775	0.916	0.881	0.8412	0.142576	0.894	0.152	0.854	0.152	0.885	0.152	0.911	0.152	0.924	0.152	0.68	0.66	0.07	0.15	0.59	0.59	0.03	0.11	0.06	0.04
CG11313	3226557462	930	kni	Dict	0.5297		*		0.08	0.39	0.31	0.54	0.03	0.798	0.528	0.732	0.217	0.778	0.462	0.84	0.638	0.859	0.778	0.3592	0.142576	0.808	0.152	0.738	0.152	0.795	0.152	0.832	0.152	0.852	0.152	0.34	0.32	0.13	0.12	0.16	0.25	0.41	0.36	0.44	0.41
CG11313	3226557462	930	luna	Dict	0.5498				0.18	0.75	0.2	0.38	0.08	0.869	0.647	0.82	0.292	0.86	0.599	0.88	0.733	0.882	0.805	0.3695	0.142576	0.861	0.152	0.819	0.152	0.852	0.152	0.879	0.152	0.903	0.152	0.62	0.62	0.08	0.12	0.38	0.41	0.28	0.2	0.3	0.25
CG11313	3226557462	930	ser	Dict	0.5058				0.11	0.78	0.3	0.27	0.16	0.893	0.688	0.842	0.31	0.879	0.621	0.905	0.793	0.918	0.869	0.4217	0.142576	0.876	0.152	0.833	0.152	0.868	0.152	0.891	0.152	0.919	0.152	0.69	0.66	0.2	0.16	0.36	0.45	0.2	0.11	0.1	0.06
CG11313	3226557462	930	sls	Dict	0.5273				0.72	0.33	0.05	0.14	0.22	0.84	0.68	0.801	0.314	0.832	0.622	0.857	0.744	0.874	0.801	0.5182	0.142576	0.839	0.152	0.799	0.152	0.832	0.152	0.859	0.152	0.883	0.152	0.03	0.07	0.46	0.61	0.64	0.52	0.12	0.06	0.21	0.16
CG1139	3101979928	502	bs	Dict	0.5319		*		0.13	0.12	0.59	0.11	0.19	0.743	0.496	0.681	0.214	0.727	0.45	0.75	0.598	0.783	0.667	0.4761	0.281523	0.731	0.152	0.674	0.152	0.719	0.152	0.753	0.152	0.785	0.152	0.05	0.08	0.32	0.29	0.1	0.22	0.53	0.5	0.19	0.2
CG1139	3101979928	502	cyce	Dict	0.5512				0.06	0.47	0.74	0.25	0.09	0.906	0.718	0.874	0.309	0.899	0.652	0.925	0.798	0.928	0.888	0.9349	0.281523	0.901	0.152	0.857	0.152	0.891	0.152	0.92	0.152	0.936	0.152	0.46	0.5	0.47	0.39	0.06	0.21	0.54	0.55	0.2	0.19
CG1139	3101979928	502	emc	Dict	0.5702				0.54	0.06	0.44	0.37	0.03	0.797	0.601	0.752	0.255	0.791	0.535	0.833	0.683	0.848	0.776	0.3552	0.281523	0.815	0.152	0.761	0.152	0.801	0.152	0.836	0.152	0.867	0.152	0.15	0.08	0.65	0.67	0.07	0.11	0.07	0.06	0.31	0.3
CG1139	3101979928	502	foxo	Dict	0.5047				0.34	0.29	0.45	0.29	0	0.752	0.553	0.703	0.242	0.741	0.489	0.775	0.636	0.778	0.742	0.2659	0.281523	0.751	0.152	0.698	0.152	0.739	0.152	0.775	0.152	0.79	0.152	0.2	0.25	0.53	0.51	0.07	0.07	0.17	0.18	0.3	0.28
CG1139	3101979928	502	mats	Dict	0.6506				0.58	0.58	0.2	0.15	0.19	0.892	0.685	0.853	0.318	0.882	0.628	0.899	0.766	0.9	0.866	3.5887	0.281523	0.884	0.152	0.843	0.152	0.875	0.152	0.897	0.152	0.918	0.152	0.72	0.65	0.54	0.62	0.07	0.12	0.01	0.04	0.07	0.04
CG1139	3101979928	502	sd	Dict	0.6362				0.34	0.63	0.37	0.24	0.02	0.856	0.667	0.823	0.286	0.851	0.597	0.87	0.767	0.871	0.849	5.3633	0.281523	0.87	0.152	0.824	0.152	0.861	0.152	0.885	0.152	0.905	0.152	0.7	0.64	0.42	0.45	0.08	0.25	0.3	0.25	0.11	0.09
CG1139	3101979928	502	tai	Dict	0.7207				0.71	0.17	0.56	0.09	0.01	0.894	0.73	0.862	0.338	0.889	0.654	0.907	0.805	0.908	0.848	0.4654	0.281523	0.899	0.152	0.868	0.152	0.893	0.152	0.908	0.152	0.921	0.152	0	0.07	0.78	0.84	0.33	0.1	0.31	0.32	0.15	0.14
CG1139	3101979928	502	ubx	Dict	0.5665				0.45	0.7	0.38	0.06	0.15	0.916	0.737	0.881	0.325	0.908	0.669	0.924	0.823	0.952	0.891	0.6049	0.281523	0.91	0.152	0.876	0.152	0.902	0.152	0.929	0.152	0.943	0.152	0.74	0.7	0.38	0.42	0.12	0.27	0.29	0.22	0.23	0.25
CG11537	3103143516	509	aret	Dict	0.6087				0.66	0.06	0.37	0.12	0	0.844	0.652	0.797	0.293	0.836	0.595	0.861	0.737	0.868	0.861	0.4688	0.680938	0.843	0.152	0.795	0.152	0.833	0.152	0.863	0.152	0.885	0.152	0.22	0.23	0.02	0.18	0.65	0.65	0.14	0.1	0.52	0.5
CG11537	3103143516	509	btd	Dict	0.8605		**		0.83	0.17	0.22	0.01	0.09	0.891	0.703	0.854	0.334	0.882	0.638	0.904	0.803	0.91	0.863	0.5246	0.680938	0.889	0.152	0.851	0.152	0.882	0.152	0.899	0.152	0.921	0.152	0.06	0.02	0.53	0.66	0.51	0.36	0.14	0.16	0.45	0.44
CG11537	3103143516	509	cg14147	Dict	0.6345		**		0.55	0.18	0.24	0.12	0.04	0.733	0.54	0.685	0.256	0.721	0.496	0.752	0.618	0.76	0.693	0.3374	0.680938	0.737	0.152	0.68	0.152	0.721	0.152	0.759	0.152	0.801	0.152	0.38	0.37	0.21	0.34	0.32	0.21	0.4	0.39	0.38	0.38
CG11537	3103143516	509	cg34394	Dict	0.5509		*		0.47	0.1	0.1	0.25	0.48	0.803	0.521	0.728	0.219	0.777	0.464	0.823	0.611	0.862	0.716	2.1385	0.680938	0.804	0.152	0.728	0.152	0.785	0.152	0.843	0.152	0.876	0.152	0.11	0.08	0.38	0.51	0.58	0.42	0.19	0.24	0.3	0.32
CG11537	3103143516	509	cg8654	Dict	0.5792		*		0.63	0.1	0.2	0.08	0.1	0.738	0.574	0.696	0.263	0.73	0.517	0.775	0.637	0.797	0.705	0.4142	0.680938	0.749	0.152	0.7	0.152	0.738	0.152	0.77	0.152	0.818	0.152	0.14	0.12	0.15	0.3	0.49	0.46	0.09	0.08	0.45	0.44
CG11537	3103143516	509	chn	Dict	0.5185				0.57	0.17	0.13	0.45	0.34	0.826	0.601	0.773	0.271	0.817	0.544	0.858	0.702	0.881	0.766	0.9439	0.680938	0.824	0.152	0.768	0.152	0.81	0.152	0.847	0.152	0.865	0.152	0.02	0.02	0.44	0.53	0.4	0.27	0.03	0.06	0.35	0.31
CG11537	3103143516	509	ct	Muta	0.6257		**		0.54	0.02	0.38	0.03	0.09	0.705	0.538	0.664	0.253	0.701	0.484	0.718	0.607	0.733	0.65	0.0056	0.680938	0.715	0.152	0.672	0.152	0.705	0.152	0.731	0.152	0.766	0.152	0.12	0.08	0.47	0.51	0.18	0.03	0.25	0.22	0.25	0.27
CG11537	3103143516	509	dad	Dict	0.509				0.6	0.35	0.36	0.11	0.33	0.869	0.651	0.825	0.301	0.858	0.591	0.884	0.743	0.901	0.864	0.3276	0.680938	0.857	0.152	0.812	0.152	0.849	0.152	0.877	0.152	0.897	0.152	0.02	0.03	0.18	0.36	0.74	0.69	0.29	0.21	0.1	0.04
CG11537	3103143516	509	dally	Dict	0.7252		*		0.64	0.29	0.47	0.31	0.12	0.906	0.705	0.866	0.306	0.895	0.649	0.919	0.783	0.941	0.845	0.8955	0.680938	0.912	0.152	0.867	0.152	0.901	0.152	0.928	0.152	0.935	0.152	0.18	0.23	0.62	0.64	0.21	0.06	0.18	0.18	0.57	0.56
CG11537	3103143516	509	dsh	Dict	0.587				0.68	0.51	0.24	0.14	0.1	0.91	0.72	0.873	0.33	0.9	0.649	0.92	0.793	0.934	0.84	1.1394	0.680938	0.91	0.152	0.871	0.152	0.9	0.152	0.923	0.152	0.937	0.152	0.68	0.66	0.19	0.35	0.33	0.27	0.26	0.26	0.32	0.3
CG11537	3103143516	509	egfr	Dict	0.6956		*		0.7	0.16	0.09	0.25	0.03	0.856	0.625	0.805	0.283	0.849	0.568	0.871	0.727	0.881	0.797	0.9394	0.680938	0.846	0.152	0.794	0.152	0.834	0.152	0.864	0.152	0.892	0.152	0.11	0.12	0.18	0.37	0.69	0.62	0.11	0.15	0.33	0.32
CG11537	3103143516	509	emc	Dict	0.6054		*		0.54	0.06	0.44	0.37	0.03	0.797	0.601	0.752	0.255	0.791	0.535	0.833	0.683	0.848	0.776	0.3552	0.680938	0.815	0.152	0.761	0.152	0.801	0.152	0.836	0.152	0.867	0.152	0.15	0.08	0.65	0.67	0.07	0.11	0.07	0.06	0.31	0.3
CG11537	3103143516	509	fj	Dict	0.6969				0.84	0.35	0.16	0.16	0.06	0.938	0.763	0.909	0.355	0.932	0.705	0.952	0.857	0.956	0.929	2.0627	0.680938	0.928	0.152	0.894	0.152	0.921	0.152	0.941	0.152	0.953	0.152	0.59	0.54	0.46	0.61	0.39	0.27	0.29	0.29	0.37	0.34
CG11537	3103143516	509	kn	Dict	0.6171				0.64	0.28	0.11	0.11	0.28	0.824	0.637	0.777	0.296	0.81	0.565	0.844	0.703	0.867	0.779	0.3931	0.680938	0.815	0.152	0.763	0.152	0.803	0.152	0.833	0.152	0.858	0.152	0.43	0.39	0.35	0.43	0.14	0.05	0.01	0.04	0.51	0.51
CG11537	3103143516	509	mad	Dict	0.7516		*		0.84	0.08	0.2	0.2	0.07	0.894	0.724	0.866	0.359	0.887	0.661	0.91	0.811	0.922	0.847	0.5446	0.680938	0.889	0.152	0.854	0.152	0.881	0.152	0.901	0.152	0.907	0.152	0.2	0.16	0.38	0.54	0.57	0.49	0.28	0.25	0.5	0.46
CG11537	3103143516	509	mats	Dict	0.5215				0.58	0.58	0.2	0.15	0.19	0.892	0.685	0.853	0.318	0.882	0.628	0.899	0.766	0.9	0.866	3.5887	0.680938	0.884	0.152	0.843	0.152	0.875	0.152	0.897	0.152	0.918	0.152	0.72	0.65	0.54	0.62	0.07	0.12	0.01	0.04	0.07	0.04
CG11537	3103143516	509	neur	Dict	0.5246				0.45	0.24	0.14	0.21	0.46	0.814	0.539	0.742	0.227	0.798	0.476	0.833	0.64	0.843	0.761	2.4309	0.680938	0.81	0.152	0.744	0.152	0.797	0.152	0.841	0.152	0.868	0.152	0.06	0.09	0.43	0.54	0.56	0.4	0.18	0.23	0.3	0.32
CG11537	3103143516	509	ptc	Dict	0.5814				0.6	0.19	0.19	0.05	0.47	0.847	0.608	0.783	0.28	0.832	0.556	0.855	0.7	0.862	0.784	1.9546	0.680938	0.831	0.152	0.769	0.152	0.813	0.152	0.863	0.152	0.884	0.152	0.46	0.46	0.19	0.39	0.58	0.48	0.06	0.01	0.05	0.01
CG11537	3103143516	509	sd	Muta	0.5525				0.58	0.16	0.17	0.41	0.11	0.76	0.568	0.706	0.264	0.746	0.497	0.791	0.631	0.798	0.704	0.009	0.680938	0.778	0.152	0.726	0.152	0.767	0.152	0.799	0.152	0.844	0.152	0.13	0.14	0.1	0.29	0.69	0.63	0.11	0.16	0.02	0.04
CG11537	3103143516	509	sgg	Dict	0.5118				0.51	0.37	0.25	0.17	0.44	0.862	0.625	0.799	0.263	0.848	0.576	0.881	0.727	0.9	0.823	1.7731	0.680938	0.841	0.152	0.783	0.152	0.828	0.152	0.862	0.152	0.907	0.152	0.21	0.23	0.29	0.34	0.24	0.18	0.23	0.22	0.74	0.74
CG11537	3103143516	509	sls	Dict	0.6485				0.72	0.33	0.05	0.14	0.22	0.84	0.68	0.801	0.314	0.832	0.622	0.857	0.744	0.874	0.801	0.5182	0.680938	0.839	0.152	0.799	0.152	0.832	0.152	0.859	0.152	0.883	0.152	0.03	0.07	0.46	0.61	0.64	0.52	0.12	0.06	0.21	0.16
CG11537	3103143516	509	socs36e	Dict	0.6309				0.74	0.08	0.47	0.09	0.11	0.886	0.717	0.854	0.333	0.88	0.654	0.898	0.808	0.901	0.891	0.4292	0.680938	0.88	0.152	0.846	0.152	0.872	0.152	0.895	0.152	0.911	0.152	0.19	0.17	0.15	0.33	0.64	0.63	0.43	0.39	0.26	0.24
CG11537	3103143516	509	tai	Dict	0.827		**		0.71	0.17	0.56	0.09	0.01	0.894	0.73	0.862	0.338	0.889	0.654	0.907	0.805	0.908	0.848	0.4654	0.680938	0.899	0.152	0.868	0.152	0.893	0.152	0.908	0.152	0.921	0.152	0	0.07	0.78	0.84	0.33	0.1	0.31	0.32	0.15	0.14
CG11537	3103143516	509	tango14	Dict	0.7995		*		0.87	0.17	0.08	0.09	0.3	0.899	0.736	0.871	0.356	0.894	0.669	0.914	0.821	0.916	0.86	1.4426	0.680938	0.909	0.152	0.875	0.152	0.902	0.152	0.923	0.152	0.932	0.152	0.16	0.13	0.48	0.67	0.77	0.62	0.08	0.02	0.09	0.05
CG11537	3103143516	509	trh	Dict	0.5287		*		0.53	0.15	0.11	0.12	0.43	0.775	0.527	0.711	0.231	0.758	0.467	0.81	0.62	0.815	0.708	0.8179	0.680938	0.778	0.152	0.714	0.152	0.764	0.152	0.808	0.152	0.854	0.152	0.09	0.08	0.37	0.52	0.61	0.45	0.21	0.27	0.06	0.09
CG11537	3103143516	509	ubx	Dict	0.5329				0.45	0.7	0.38	0.06	0.15	0.916	0.737	0.881	0.325	0.908	0.669	0.924	0.823	0.952	0.891	0.6049	0.680938	0.91	0.152	0.876	0.152	0.902	0.152	0.929	0.152	0.943	0.152	0.74	0.7	0.38	0.42	0.12	0.27	0.29	0.22	0.23	0.25
CG12374	2208657848	343	ap	Dict	0.5925				0.13	0.81	0.11	0.15	0.22	0.856	0.666	0.815	0.299	0.847	0.607	0.87	0.745	0.871	0.826	0.394	0.27956	0.86	0.152	0.82	0.152	0.852	0.152	0.875	0.152	0.892	0.152	0.74	0.76	0.27	0.23	0.17	0.16	0.1	0.06	0.21	0.18
CG12374	2208657848	343	bun	Dict	0.5921				0.18	0.78	0.06	0.17	0.19	0.885	0.664	0.841	0.31	0.875	0.609	0.91	0.742	0.935	0.885	0.7822	0.27956	0.887	0.152	0.834	0.152	0.874	0.152	0.905	0.152	0.925	0.152	0.54	0.52	0.04	0.14	0.61	0.58	0.13	0.22	0.05	0.09
CG12374	2208657848	343	dlp	Dict	0.61		*		0.22	0.56	0.21	0.39	0.18	0.845	0.586	0.784	0.258	0.829	0.528	0.86	0.691	0.881	0.769	0.9958	0.27956	0.815	0.152	0.755	0.152	0.8	0.152	0.84	0.152	0.86	0.152	0.56	0.54	0.26	0.3	0.02	0.14	0.16	0.13	0.33	0.32
CG12374	2208657848	343	ds	Dict	0.52				0.39	0.84	0.12	0.23	0.09	0.937	0.759	0.903	0.356	0.929	0.684	0.943	0.852	0.947	0.903	5.7655	0.27956	0.932	0.152	0.898	0.152	0.925	0.152	0.944	0.152	0.956	0.152	0.89	0.85	0.21	0.26	0.14	0.21	0.26	0.31	0.22	0.21
CG12374	2208657848	343	dsh	Dict	0.5022				0.68	0.51	0.24	0.14	0.1	0.91	0.72	0.873	0.33	0.9	0.649	0.92	0.793	0.934	0.84	1.1394	0.27956	0.91	0.152	0.871	0.152	0.9	0.152	0.923	0.152	0.937	0.152	0.68	0.66	0.19	0.35	0.33	0.27	0.26	0.26	0.32	0.3
CG12374	2208657848	343	ft	Dict	0.5066				0.39	0.75	0.08	0.35	0.1	0.927	0.72	0.889	0.323	0.919	0.649	0.933	0.808	0.941	0.888	4.3023	0.27956	0.916	0.152	0.877	0.152	0.907	0.152	0.938	0.152	0.95	0.152	0.77	0.7	0.42	0.43	0.25	0.36	0.22	0.28	0.21	0.2
CG12374	2208657848	343	kay	Dict	0.5727				0.28	0.64	0.08	0.07	0.3	0.825	0.609	0.772	0.243	0.814	0.538	0.851	0.678	0.862	0.785	0.4534	0.27956	0.821	0.152	0.767	0.152	0.806	0.152	0.839	0.152	0.857	0.152	0.47	0.49	0.19	0.23	0.32	0.32	0.18	0.13	0.28	0.24
CG12374	2208657848	343	rpt1	Dict	0.5133				0.04	0.25	0.66	0.15	0.07	0.793	0.555	0.721	0.245	0.77	0.503	0.816	0.623	0.817	0.725	0.264	0.27956	0.775	0.152	0.72	0.152	0.763	0.152	0.791	0.152	0.839	0.152	0.12	0.08	0.45	0.35	0.32	0.47	0.36	0.32	0.25	0.23
CG12374	2208657848	343	sav	Dict	0.5183				0.34	0.81	0.01	0.18	0.13	0.914	0.732	0.873	0.328	0.904	0.656	0.928	0.795	0.931	0.931	0.5947	0.27956	0.909	0.152	0.868	0.152	0.902	0.152	0.929	0.152	0.952	0.152	0.58	0.56	0.05	0.15	0.59	0.59	0.16	0.23	0.3	0.28
CG12374	2208657848	343	ser	Dict	0.5347				0.11	0.78	0.3	0.27	0.16	0.893	0.688	0.842	0.31	0.879	0.621	0.905	0.793	0.918	0.869	0.4217	0.27956	0.876	0.152	0.833	0.152	0.868	0.152	0.891	0.152	0.919	0.152	0.69	0.66	0.2	0.16	0.36	0.45	0.2	0.11	0.1	0.06
CG12374	2208657848	343	ubx	Dict	0.5753				0.45	0.7	0.38	0.06	0.15	0.916	0.737	0.881	0.325	0.908	0.669	0.924	0.823	0.952	0.891	0.6049	0.27956	0.91	0.152	0.876	0.152	0.902	0.152	0.929	0.152	0.943	0.152	0.74	0.7	0.38	0.42	0.12	0.27	0.29	0.22	0.23	0.25
CG12413	3224385800	912	d	Dict	0.5378		*		0.16	0.46	0.09	0.05	0.56	0.732	0.49	0.664	0.199	0.718	0.433	0.759	0.581	0.795	0.674	0.2325	0.192113	0.728	0.152	0.67	0.152	0.715	0.152	0.75	0.152	0.79	0.152	0.42	0.39	0.05	0.02	0.29	0.29	0.05	0.03	0.37	0.4
CG12413	3224385803	912	kni	Dict	0.51				0.08	0.39	0.31	0.54	0.03	0.798	0.528	0.732	0.217	0.778	0.462	0.84	0.638	0.859	0.778	0.3592	0.0318168	0.808	0.152	0.738	0.152	0.795	0.152	0.832	0.152	0.852	0.152	0.34	0.32	0.13	0.12	0.16	0.25	0.41	0.36	0.44	0.41
CG12413	3224385803	912	med	Dict	0.6716		*		0.17	0.63	0.24	0.37	0.19	0.855	0.625	0.8	0.281	0.843	0.558	0.875	0.718	0.896	0.847	0.768	0.0318168	0.84	0.152	0.789	0.152	0.828	0.152	0.862	0.152	0.893	0.152	0.54	0.51	0.21	0.19	0.24	0.32	0.14	0.06	0.15	0.1
CG12413	3224385800	912	med	Dict	0.6242				0.17	0.63	0.24	0.37	0.19	0.855	0.625	0.8	0.281	0.843	0.558	0.875	0.718	0.896	0.847	0.768	0.192113	0.84	0.152	0.789	0.152	0.828	0.152	0.862	0.152	0.893	0.152	0.54	0.51	0.21	0.19	0.24	0.32	0.14	0.06	0.15	0.1
CG12413	3224385803	912	sd	Dict	0.5138				0.34	0.63	0.37	0.24	0.02	0.856	0.667	0.823	0.286	0.851	0.597	0.87	0.767	0.871	0.849	5.3633	0.0318168	0.87	0.152	0.824	0.152	0.861	0.152	0.885	0.152	0.905	0.152	0.7	0.64	0.42	0.45	0.08	0.25	0.3	0.25	0.11	0.09
CG12413	3224385803	912	ser	Dict	0.5748				0.11	0.78	0.3	0.27	0.16	0.893	0.688	0.842	0.31	0.879	0.621	0.905	0.793	0.918	0.869	0.4217	0.0318168	0.876	0.152	0.833	0.152	0.868	0.152	0.891	0.152	0.919	0.152	0.69	0.66	0.2	0.16	0.36	0.45	0.2	0.11	0.1	0.06
CG12413	3224385800	912	ser	Dict	0.5338				0.11	0.78	0.3	0.27	0.16	0.893	0.688	0.842	0.31	0.879	0.621	0.905	0.793	0.918	0.869	0.4217	0.192113	0.876	0.152	0.833	0.152	0.868	0.152	0.891	0.152	0.919	0.152	0.69	0.66	0.2	0.16	0.36	0.45	0.2	0.11	0.1	0.06
CG12413	3224385803	912	tmod	Dict	0.5467				0.2	0.49	0.1	0.6	0.13	0.821	0.592	0.765	0.243	0.814	0.518	0.84	0.668	0.868	0.753	0.6584	0.0318168	0.822	0.152	0.761	0.152	0.81	0.152	0.852	0.152	0.876	0.152	0.57	0.56	0.02	0.09	0.05	0.01	0.01	0.04	0.36	0.34
CG12413	3224385800	912	tmod	Dict	0.5145				0.2	0.49	0.1	0.6	0.13	0.821	0.592	0.765	0.243	0.814	0.518	0.84	0.668	0.868	0.753	0.6584	0.192113	0.822	0.152	0.761	0.152	0.81	0.152	0.852	0.152	0.876	0.152	0.57	0.56	0.02	0.09	0.05	0.01	0.01	0.04	0.36	0.34
CG12413	3224385800	912	vang	Dict	0.6652		**		0.2	0.01	0.23	0.3	0.66	0.779	0.47	0.703	0.168	0.763	0.403	0.809	0.59	0.814	0.721	0.3247	0.192113	0.763	0.152	0.688	0.152	0.745	0.152	0.799	0.152	0.832	0.152	0.18	0.18	0.04	0.15	0.4	0.36	0.18	0.1	0.11	0.17
CG12413	3224385803	912	vang	Dict	0.5768		*		0.2	0.01	0.23	0.3	0.66	0.779	0.47	0.703	0.168	0.763	0.403	0.809	0.59	0.814	0.721	0.3247	0.0318168	0.763	0.152	0.688	0.152	0.745	0.152	0.799	0.152	0.832	0.152	0.18	0.18	0.04	0.15	0.4	0.36	0.18	0.1	0.11	0.17
CG12413	3224385803	912	yki	Dict	0.5062		*		0.25	0.37	0.29	0.38	0.05	0.708	0.492	0.653	0.208	0.693	0.424	0.741	0.58	0.745	0.684	1.8695	0.0318168	0.696	0.152	0.646	0.152	0.684	0.152	0.734	0.152	0.761	0.152	0.39	0.36	0.27	0.29	0	0.11	0.27	0.24	0.18	0.15
CG12484	2216323313	411	ap	Dict	0.6678		*		0.13	0.81	0.11	0.15	0.22	0.856	0.666	0.815	0.299	0.847	0.607	0.87	0.745	0.871	0.826	0.394	0.349276	0.86	0.152	0.82	0.152	0.852	0.152	0.875	0.152	0.892	0.152	0.74	0.76	0.27	0.23	0.17	0.16	0.1	0.06	0.21	0.18
CG12484	2216301399	410	aret	Dict	0.6426				0.66	0.06	0.37	0.12	0	0.844	0.652	0.797	0.293	0.836	0.595	0.861	0.737	0.868	0.861	0.4688	0.599904	0.843	0.152	0.795	0.152	0.833	0.152	0.863	0.152	0.885	0.152	0.22	0.23	0.02	0.18	0.65	0.65	0.14	0.1	0.52	0.5
CG12484	2216323313	411	brk	Dict	0.5561				0.23	0.77	0.25	0.5	0.11	0.919	0.718	0.886	0.323	0.914	0.651	0.937	0.802	0.946	0.885	2.1159	0.349276	0.925	0.152	0.883	0.152	0.916	0.152	0.939	0.152	0.957	0.152	0.69	0.71	0.37	0.36	0.24	0.17	0.03	0.08	0.36	0.33
CG12484	2216301399	410	btd	Dict	0.7103		*		0.83	0.17	0.22	0.01	0.09	0.891	0.703	0.854	0.334	0.882	0.638	0.904	0.803	0.91	0.863	0.5246	0.599904	0.889	0.152	0.851	0.152	0.882	0.152	0.899	0.152	0.921	0.152	0.06	0.02	0.53	0.66	0.51	0.36	0.14	0.16	0.45	0.44
CG12484	2216323313	411	bx	Dict	0.584				0.2	0.83	0.2	0.29	0.05	0.899	0.714	0.867	0.309	0.895	0.651	0.907	0.792	0.914	0.858	1.1999	0.349276	0.901	0.152	0.863	0.152	0.894	0.152	0.918	0.152	0.934	0.152	0.79	0.8	0.29	0.26	0.25	0.22	0.02	0.06	0.34	0.32
CG12484	2216301399	410	bx	Dict	0.5177				0.2	0.83	0.2	0.29	0.05	0.899	0.714	0.867	0.309	0.895	0.651	0.907	0.792	0.914	0.858	1.1999	0.599904	0.901	0.152	0.863	0.152	0.894	0.152	0.918	0.152	0.934	0.152	0.79	0.8	0.29	0.26	0.25	0.22	0.02	0.06	0.34	0.32
CG12484	2216301399	410	cg8654	Dict	0.6217		*		0.63	0.1	0.2	0.08	0.1	0.738	0.574	0.696	0.263	0.73	0.517	0.775	0.637	0.797	0.705	0.4142	0.599904	0.749	0.152	0.7	0.152	0.738	0.152	0.77	0.152	0.818	0.152	0.14	0.12	0.15	0.3	0.49	0.46	0.09	0.08	0.45	0.44
CG12484	2216323313	411	cv2	Dict	0.7118		*		0.56	0.49	0.08	0.38	0.25	0.87	0.685	0.828	0.295	0.86	0.6	0.893	0.763	0.898	0.844	0.5685	0.349276	0.859	0.152	0.814	0.152	0.85	0.152	0.878	0.152	0.914	0.152	0.31	0.35	0.38	0.43	0.3	0.25	0.13	0.11	0.62	0.59
CG12484	2216301399	410	cv2	Dict	0.5828				0.56	0.49	0.08	0.38	0.25	0.87	0.685	0.828	0.295	0.86	0.6	0.893	0.763	0.898	0.844	0.5685	0.599904	0.859	0.152	0.814	0.152	0.85	0.152	0.878	0.152	0.914	0.152	0.31	0.35	0.38	0.43	0.3	0.25	0.13	0.11	0.62	0.59
CG12484	2216301399	410	dad	Dict	0.6637		*		0.6	0.35	0.36	0.11	0.33	0.869	0.651	0.825	0.301	0.858	0.591	0.884	0.743	0.901	0.864	0.3276	0.599904	0.857	0.152	0.812	0.152	0.849	0.152	0.877	0.152	0.897	0.152	0.02	0.03	0.18	0.36	0.74	0.69	0.29	0.21	0.1	0.04
CG12484	2216323313	411	dad	Dict	0.5347				0.6	0.35	0.36	0.11	0.33	0.869	0.651	0.825	0.301	0.858	0.591	0.884	0.743	0.901	0.864	0.3276	0.349276	0.857	0.152	0.812	0.152	0.849	0.152	0.877	0.152	0.897	0.152	0.02	0.03	0.18	0.36	0.74	0.69	0.29	0.21	0.1	0.04
CG12484	2216301399	410	dally	Dict	0.538				0.64	0.29	0.47	0.31	0.12	0.906	0.705	0.866	0.306	0.895	0.649	0.919	0.783	0.941	0.845	0.8955	0.599904	0.912	0.152	0.867	0.152	0.901	0.152	0.928	0.152	0.935	0.152	0.18	0.23	0.62	0.64	0.21	0.06	0.18	0.18	0.57	0.56
CG12484	2216301399	410	dll	Dict	0.5918				0.22	0.84	0.07	0.09	0.13	0.893	0.691	0.855	0.319	0.882	0.626	0.902	0.775	0.916	0.881	0.8412	0.599904	0.894	0.152	0.854	0.152	0.885	0.152	0.911	0.152	0.924	0.152	0.68	0.66	0.07	0.15	0.59	0.59	0.03	0.11	0.06	0.04
CG12484	2216301399	410	dpp	Dict	0.7065		*		0.44	0.75	0.19	0.01	0.02	0.891	0.7	0.852	0.316	0.883	0.644	0.907	0.794	0.913	0.856	0.4649	0.599904	0.891	0.152	0.853	0.152	0.884	0.152	0.902	0.152	0.92	0.152	0.58	0.59	0.35	0.4	0.49	0.42	0.15	0.2	0.22	0.21
CG12484	2216301399	410	egfr	Dict	0.6277		*		0.7	0.16	0.09	0.25	0.03	0.856	0.625	0.805	0.283	0.849	0.568	0.871	0.727	0.881	0.797	0.9394	0.599904	0.846	0.152	0.794	0.152	0.834	0.152	0.864	0.152	0.892	0.152	0.11	0.12	0.18	0.37	0.69	0.62	0.11	0.15	0.33	0.32
CG12484	2216323313	411	fz	Dict	0.5053				0.06	0.7	0.17	0.26	0.24	0.85	0.643	0.804	0.281	0.839	0.574	0.861	0.74	0.866	0.798	0.4509	0.349276	0.841	0.152	0.79	0.152	0.826	0.152	0.861	0.152	0.882	0.152	0.77	0.78	0.15	0.08	0.06	0.08	0.02	0.03	0.39	0.4
CG12484	2216323313	411	kay	Dict	0.7097		**		0.28	0.64	0.08	0.07	0.3	0.825	0.609	0.772	0.243	0.814	0.538	0.851	0.678	0.862	0.785	0.4534	0.349276	0.821	0.152	0.767	0.152	0.806	0.152	0.839	0.152	0.857	0.152	0.47	0.49	0.19	0.23	0.32	0.32	0.18	0.13	0.28	0.24
CG12484	2216323313	411	kni	Dict	0.5544		*		0.08	0.39	0.31	0.54	0.03	0.798	0.528	0.732	0.217	0.778	0.462	0.84	0.638	0.859	0.778	0.3592	0.349276	0.808	0.152	0.738	0.152	0.795	0.152	0.832	0.152	0.852	0.152	0.34	0.32	0.13	0.12	0.16	0.25	0.41	0.36	0.44	0.41
CG12484	2216323313	411	lea	Dict	0.6226		**		0.06	0.56	0.09	0.04	0.24	0.714	0.505	0.665	0.233	0.706	0.452	0.734	0.592	0.736	0.647	0.2912	0.349276	0.723	0.152	0.659	0.152	0.704	0.152	0.756	0.152	0.813	0.152	0.53	0.51	0.06	0.06	0.18	0.24	0.1	0.06	0.28	0.28
CG12484	2216323313	411	luna	Dict	0.6686		*		0.18	0.75	0.2	0.38	0.08	0.869	0.647	0.82	0.292	0.86	0.599	0.88	0.733	0.882	0.805	0.3695	0.349276	0.861	0.152	0.819	0.152	0.852	0.152	0.879	0.152	0.903	0.152	0.62	0.62	0.08	0.12	0.38	0.41	0.28	0.2	0.3	0.25
CG12484	2216301399	410	mad	Dict	0.6791				0.84	0.08	0.2	0.2	0.07	0.894	0.724	0.866	0.359	0.887	0.661	0.91	0.811	0.922	0.847	0.5446	0.599904	0.889	0.152	0.854	0.152	0.881	0.152	0.901	0.152	0.907	0.152	0.2	0.16	0.38	0.54	0.57	0.49	0.28	0.25	0.5	0.46
CG12484	2216323313	411	mad	Dict	0.6483				0.84	0.08	0.2	0.2	0.07	0.894	0.724	0.866	0.359	0.887	0.661	0.91	0.811	0.922	0.847	0.5446	0.349276	0.889	0.152	0.854	0.152	0.881	0.152	0.901	0.152	0.907	0.152	0.2	0.16	0.38	0.54	0.57	0.49	0.28	0.25	0.5	0.46
CG12484	2216301399	410	mer	Dict	0.6062		*		0.55	0.22	0.26	0.44	0.25	0.801	0.584	0.747	0.252	0.783	0.511	0.832	0.672	0.836	0.714	0.5311	0.599904	0.805	0.152	0.756	0.152	0.794	0.152	0.829	0.152	0.878	0.152	0.03	0.03	0.1	0.25	0.57	0.55	0.11	0.08	0.08	0.08
CG12484	2216323313	411	mpk2	Dict	0.5882				0.18	0.68	0.09	0.37	0.15	0.846	0.633	0.806	0.278	0.839	0.57	0.862	0.742	0.889	0.829	0.4463	0.349276	0.849	0.152	0.797	0.152	0.837	0.152	0.878	0.152	0.903	0.152	0.61	0.59	0.05	0.06	0.23	0.26	0.05	0.09	0.59	0.58
CG12484	2216323313	411	pnt	Dict	0.5802				0.28	0.69	0.03	0.39	0.09	0.858	0.653	0.816	0.281	0.853	0.584	0.873	0.772	0.886	0.829	0.9325	0.349276	0.843	0.152	0.802	0.152	0.836	0.152	0.865	0.152	0.891	0.152	0.52	0.53	0.21	0.26	0.4	0.37	0.11	0.04	0.34	0.29
CG12484	2216301399	410	rho	Dict	0.5438				0.42	0.64	0.27	0.24	0.06	0.883	0.676	0.842	0.302	0.873	0.632	0.896	0.784	0.901	0.867	0.6139	0.599904	0.882	0.152	0.835	0.152	0.87	0.152	0.895	0.152	0.913	0.152	0.45	0.44	0.28	0.37	0.56	0.47	0.39	0.44	0.18	0.17
CG12484	2216323313	411	sav	Dict	0.627				0.34	0.81	0.01	0.18	0.13	0.914	0.732	0.873	0.328	0.904	0.656	0.928	0.795	0.931	0.931	0.5947	0.349276	0.909	0.152	0.868	0.152	0.902	0.152	0.929	0.152	0.952	0.152	0.58	0.56	0.05	0.15	0.59	0.59	0.16	0.23	0.3	0.28
CG12484	2216301399	410	sav	Dict	0.6121				0.34	0.81	0.01	0.18	0.13	0.914	0.732	0.873	0.328	0.904	0.656	0.928	0.795	0.931	0.931	0.5947	0.599904	0.909	0.152	0.868	0.152	0.902	0.152	0.929	0.152	0.952	0.152	0.58	0.56	0.05	0.15	0.59	0.59	0.16	0.23	0.3	0.28
CG12484	2216301399	410	sd	Muta	0.6567		**		0.58	0.16	0.17	0.41	0.11	0.76	0.568	0.706	0.264	0.746	0.497	0.791	0.631	0.798	0.704	0.009	0.599904	0.778	0.152	0.726	0.152	0.767	0.152	0.799	0.152	0.844	0.152	0.13	0.14	0.1	0.29	0.69	0.63	0.11	0.16	0.02	0.04
CG12484	2216323313	411	sgg	Dict	0.5656				0.51	0.37	0.25	0.17	0.44	0.862	0.625	0.799	0.263	0.848	0.576	0.881	0.727	0.9	0.823	1.7731	0.349276	0.841	0.152	0.783	0.152	0.828	0.152	0.862	0.152	0.907	0.152	0.21	0.23	0.29	0.34	0.24	0.18	0.23	0.22	0.74	0.74
CG12484	2216323313	411	shn	Dict	0.5802		*		0.07	0.42	0.09	0.6	0.08	0.789	0.552	0.733	0.222	0.78	0.475	0.812	0.651	0.824	0.737	0.7674	0.349276	0.779	0.152	0.71	0.152	0.762	0.152	0.81	0.152	0.865	0.152	0.35	0.37	0.05	0.03	0.05	0.08	0.21	0.19	0.46	0.41
CG12484	2216301399	410	sls	Dict	0.6319				0.72	0.33	0.05	0.14	0.22	0.84	0.68	0.801	0.314	0.832	0.622	0.857	0.744	0.874	0.801	0.5182	0.599904	0.839	0.152	0.799	0.152	0.832	0.152	0.859	0.152	0.883	0.152	0.03	0.07	0.46	0.61	0.64	0.52	0.12	0.06	0.21	0.16
CG12484	2216323313	411	sls	Dict	0.5873				0.72	0.33	0.05	0.14	0.22	0.84	0.68	0.801	0.314	0.832	0.622	0.857	0.744	0.874	0.801	0.5182	0.349276	0.839	0.152	0.799	0.152	0.832	0.152	0.859	0.152	0.883	0.152	0.03	0.07	0.46	0.61	0.64	0.52	0.12	0.06	0.21	0.16
CG12484	2216301399	410	socs36e	Dict	0.7518		*		0.74	0.08	0.47	0.09	0.11	0.886	0.717	0.854	0.333	0.88	0.654	0.898	0.808	0.901	0.891	0.4292	0.599904	0.88	0.152	0.846	0.152	0.872	0.152	0.895	0.152	0.911	0.152	0.19	0.17	0.15	0.33	0.64	0.63	0.43	0.39	0.26	0.24
CG12484	2216323313	411	socs36e	Dict	0.5386				0.74	0.08	0.47	0.09	0.11	0.886	0.717	0.854	0.333	0.88	0.654	0.898	0.808	0.901	0.891	0.4292	0.349276	0.88	0.152	0.846	0.152	0.872	0.152	0.895	0.152	0.911	0.152	0.19	0.17	0.15	0.33	0.64	0.63	0.43	0.39	0.26	0.24
CG12484	2216301399	410	sog	Dict	0.594				0.53	0.17	0.36	0.18	0.04	0.794	0.601	0.737	0.279	0.78	0.545	0.816	0.693	0.827	0.806	0.8503	0.599904	0.793	0.152	0.735	0.152	0.778	0.152	0.817	0.152	0.858	0.152	0.13	0.17	0.18	0.03	0.7	0.73	0.04	0.09	0.43	0.41
CG12484	2216301399	410	tango14	Dict	0.734				0.87	0.17	0.08	0.09	0.3	0.899	0.736	0.871	0.356	0.894	0.669	0.914	0.821	0.916	0.86	1.4426	0.599904	0.909	0.152	0.875	0.152	0.902	0.152	0.923	0.152	0.932	0.152	0.16	0.13	0.48	0.67	0.77	0.62	0.08	0.02	0.09	0.05
CG12499	3218268541	870	btd	Dict	0.7281		*		0.83	0.17	0.22	0.01	0.09	0.891	0.703	0.854	0.334	0.882	0.638	0.904	0.803	0.91	0.863	0.5246	0.567627	0.889	0.152	0.851	0.152	0.882	0.152	0.899	0.152	0.921	0.152	0.06	0.02	0.53	0.66	0.51	0.36	0.14	0.16	0.45	0.44
CG12499	3218268541	870	caup	Dict	0.6683		**		0.39	0.27	0.36	0.28	0.08	0.739	0.514	0.677	0.216	0.722	0.459	0.77	0.596	0.771	0.643	0.3834	0.567627	0.746	0.152	0.685	0.152	0.729	0.152	0.769	0.152	0.794	0.152	0.08	0.11	0.36	0.43	0.31	0.18	0.42	0.43	0.06	0.06
CG12499	3218268541	870	cg14147	Dict	0.5103				0.55	0.18	0.24	0.12	0.04	0.733	0.54	0.685	0.256	0.721	0.496	0.752	0.618	0.76	0.693	0.3374	0.567627	0.737	0.152	0.68	0.152	0.721	0.152	0.759	0.152	0.801	0.152	0.38	0.37	0.21	0.34	0.32	0.21	0.4	0.39	0.38	0.38
CG12499	3218268541	870	ct	Muta	0.55		*		0.54	0.02	0.38	0.03	0.09	0.705	0.538	0.664	0.253	0.701	0.484	0.718	0.607	0.733	0.65	0.0056	0.567627	0.715	0.152	0.672	0.152	0.705	0.152	0.731	0.152	0.766	0.152	0.12	0.08	0.47	0.51	0.18	0.03	0.25	0.22	0.25	0.27
CG12499	3218268541	870	dally	Dict	0.5367				0.64	0.29	0.47	0.31	0.12	0.906	0.705	0.866	0.306	0.895	0.649	0.919	0.783	0.941	0.845	0.8955	0.567627	0.912	0.152	0.867	0.152	0.901	0.152	0.928	0.152	0.935	0.152	0.18	0.23	0.62	0.64	0.21	0.06	0.18	0.18	0.57	0.56
CG12499	3218268541	870	egfr	Dict	0.5121				0.7	0.16	0.09	0.25	0.03	0.856	0.625	0.805	0.283	0.849	0.568	0.871	0.727	0.881	0.797	0.9394	0.567627	0.846	0.152	0.794	0.152	0.834	0.152	0.864	0.152	0.892	0.152	0.11	0.12	0.18	0.37	0.69	0.62	0.11	0.15	0.33	0.32
CG12499	3218268541	870	mer	Dict	0.5271				0.55	0.22	0.26	0.44	0.25	0.801	0.584	0.747	0.252	0.783	0.511	0.832	0.672	0.836	0.714	0.5311	0.567627	0.805	0.152	0.756	0.152	0.794	0.152	0.829	0.152	0.878	0.152	0.03	0.03	0.1	0.25	0.57	0.55	0.11	0.08	0.08	0.08
CG12499	3218268541	870	rho	Dict	0.505				0.42	0.64	0.27	0.24	0.06	0.883	0.676	0.842	0.302	0.873	0.632	0.896	0.784	0.901	0.867	0.6139	0.567627	0.882	0.152	0.835	0.152	0.87	0.152	0.895	0.152	0.913	0.152	0.45	0.44	0.28	0.37	0.56	0.47	0.39	0.44	0.18	0.17
CG12499	3218268541	870	sd	Muta	0.5147				0.58	0.16	0.17	0.41	0.11	0.76	0.568	0.706	0.264	0.746	0.497	0.791	0.631	0.798	0.704	0.009	0.567627	0.778	0.152	0.726	0.152	0.767	0.152	0.799	0.152	0.844	0.152	0.13	0.14	0.1	0.29	0.69	0.63	0.11	0.16	0.02	0.04
CG12499	3218268541	870	sgg	Dict	0.5049				0.51	0.37	0.25	0.17	0.44	0.862	0.625	0.799	0.263	0.848	0.576	0.881	0.727	0.9	0.823	1.7731	0.567627	0.841	0.152	0.783	0.152	0.828	0.152	0.862	0.152	0.907	0.152	0.21	0.23	0.29	0.34	0.24	0.18	0.23	0.22	0.74	0.74
CG12499	3218268541	870	spi	Dict	0.5024				0.23	0.37	0.57	0.11	0.37	0.827	0.601	0.778	0.242	0.821	0.54	0.837	0.698	0.84	0.809	0.4719	0.567627	0.83	0.152	0.779	0.152	0.818	0.152	0.856	0.152	0.893	0.152	0.4	0.43	0.43	0.36	0.07	0.16	0.33	0.31	0.43	0.45
CG12499	3218268541	870	tai	Dict	0.7588		*		0.71	0.17	0.56	0.09	0.01	0.894	0.73	0.862	0.338	0.889	0.654	0.907	0.805	0.908	0.848	0.4654	0.567627	0.899	0.152	0.868	0.152	0.893	0.152	0.908	0.152	0.921	0.152	0	0.07	0.78	0.84	0.33	0.1	0.31	0.32	0.15	0.14
CG12499	3218268541	870	tango14	Dict	0.5586				0.87	0.17	0.08	0.09	0.3	0.899	0.736	0.871	0.356	0.894	0.669	0.914	0.821	0.916	0.86	1.4426	0.567627	0.909	0.152	0.875	0.152	0.902	0.152	0.923	0.152	0.932	0.152	0.16	0.13	0.48	0.67	0.77	0.62	0.08	0.02	0.09	0.05
CG12499	3218268541	870	ubx	Dict	0.5115				0.45	0.7	0.38	0.06	0.15	0.916	0.737	0.881	0.325	0.908	0.669	0.924	0.823	0.952	0.891	0.6049	0.567627	0.91	0.152	0.876	0.152	0.902	0.152	0.929	0.152	0.943	0.152	0.74	0.7	0.38	0.42	0.12	0.27	0.29	0.22	0.23	0.25
CG12523	3110795919	132	aret	Dict	0.8082		**		0.66	0.06	0.37	0.12	0	0.844	0.652	0.797	0.293	0.836	0.595	0.861	0.737	0.868	0.861	0.4688	0.31216	0.843	0.152	0.795	0.152	0.833	0.152	0.863	0.152	0.885	0.152	0.22	0.23	0.02	0.18	0.65	0.65	0.14	0.1	0.52	0.5
CG12523	3110795348	132	aret	Dict	0.7903		**		0.66	0.06	0.37	0.12	0	0.844	0.652	0.797	0.293	0.836	0.595	0.861	0.737	0.868	0.861	0.4688	0.301309	0.843	0.152	0.795	0.152	0.833	0.152	0.863	0.152	0.885	0.152	0.22	0.23	0.02	0.18	0.65	0.65	0.14	0.1	0.52	0.5
CG12523	3110790732	618	brk	Dict	0.6082				0.23	0.77	0.25	0.5	0.11	0.919	0.718	0.886	0.323	0.914	0.651	0.937	0.802	0.946	0.885	2.1159	0.169197	0.925	0.152	0.883	0.152	0.916	0.152	0.939	0.152	0.957	0.152	0.69	0.71	0.37	0.36	0.24	0.17	0.03	0.08	0.36	0.33
CG12523	3110790732	618	btd	Dict	0.6813				0.83	0.17	0.22	0.01	0.09	0.891	0.703	0.854	0.334	0.882	0.638	0.904	0.803	0.91	0.863	0.5246	0.169197	0.889	0.152	0.851	0.152	0.882	0.152	0.899	0.152	0.921	0.152	0.06	0.02	0.53	0.66	0.51	0.36	0.14	0.16	0.45	0.44
CG12523	3110795919	132	btd	Dict	0.6106				0.83	0.17	0.22	0.01	0.09	0.891	0.703	0.854	0.334	0.882	0.638	0.904	0.803	0.91	0.863	0.5246	0.31216	0.889	0.152	0.851	0.152	0.882	0.152	0.899	0.152	0.921	0.152	0.06	0.02	0.53	0.66	0.51	0.36	0.14	0.16	0.45	0.44
CG12523	3110795348	132	btd	Dict	0.5793				0.83	0.17	0.22	0.01	0.09	0.891	0.703	0.854	0.334	0.882	0.638	0.904	0.803	0.91	0.863	0.5246	0.301309	0.889	0.152	0.851	0.152	0.882	0.152	0.899	0.152	0.921	0.152	0.06	0.02	0.53	0.66	0.51	0.36	0.14	0.16	0.45	0.44
CG12523	3110790732	618	bun	Dict	0.5261				0.18	0.78	0.06	0.17	0.19	0.885	0.664	0.841	0.31	0.875	0.609	0.91	0.742	0.935	0.885	0.7822	0.169197	0.887	0.152	0.834	0.152	0.874	0.152	0.905	0.152	0.925	0.152	0.54	0.52	0.04	0.14	0.61	0.58	0.13	0.22	0.05	0.09
CG12523	3110790732	618	bx	Dict	0.5365				0.2	0.83	0.2	0.29	0.05	0.899	0.714	0.867	0.309	0.895	0.651	0.907	0.792	0.914	0.858	1.1999	0.169197	0.901	0.152	0.863	0.152	0.894	0.152	0.918	0.152	0.934	0.152	0.79	0.8	0.29	0.26	0.25	0.22	0.02	0.06	0.34	0.32
CG12523	3110795348	132	cg8654	Dict	0.6241		*		0.63	0.1	0.2	0.08	0.1	0.738	0.574	0.696	0.263	0.73	0.517	0.775	0.637	0.797	0.705	0.4142	0.301309	0.749	0.152	0.7	0.152	0.738	0.152	0.77	0.152	0.818	0.152	0.14	0.12	0.15	0.3	0.49	0.46	0.09	0.08	0.45	0.44
CG12523	3110795919	132	cg8654	Dict	0.6082		*		0.63	0.1	0.2	0.08	0.1	0.738	0.574	0.696	0.263	0.73	0.517	0.775	0.637	0.797	0.705	0.4142	0.31216	0.749	0.152	0.7	0.152	0.738	0.152	0.77	0.152	0.818	0.152	0.14	0.12	0.15	0.3	0.49	0.46	0.09	0.08	0.45	0.44
CG12523	3110790732	618	chn	Dict	0.6301		*		0.57	0.17	0.13	0.45	0.34	0.826	0.601	0.773	0.271	0.817	0.544	0.858	0.702	0.881	0.766	0.9439	0.169197	0.824	0.152	0.768	0.152	0.81	0.152	0.847	0.152	0.865	0.152	0.02	0.02	0.44	0.53	0.4	0.27	0.03	0.06	0.35	0.31
CG12523	3110790732	618	cv2	Dict	0.6624				0.56	0.49	0.08	0.38	0.25	0.87	0.685	0.828	0.295	0.86	0.6	0.893	0.763	0.898	0.844	0.5685	0.169197	0.859	0.152	0.814	0.152	0.85	0.152	0.878	0.152	0.914	0.152	0.31	0.35	0.38	0.43	0.3	0.25	0.13	0.11	0.62	0.59
CG12523	3110795348	132	dad	Dict	0.6598		*		0.6	0.35	0.36	0.11	0.33	0.869	0.651	0.825	0.301	0.858	0.591	0.884	0.743	0.901	0.864	0.3276	0.301309	0.857	0.152	0.812	0.152	0.849	0.152	0.877	0.152	0.897	0.152	0.02	0.03	0.18	0.36	0.74	0.69	0.29	0.21	0.1	0.04
CG12523	3110790732	618	dad	Dict	0.581				0.6	0.35	0.36	0.11	0.33	0.869	0.651	0.825	0.301	0.858	0.591	0.884	0.743	0.901	0.864	0.3276	0.169197	0.857	0.152	0.812	0.152	0.849	0.152	0.877	0.152	0.897	0.152	0.02	0.03	0.18	0.36	0.74	0.69	0.29	0.21	0.1	0.04
CG12523	3110790732	618	dally	Dict	0.7058		*		0.64	0.29	0.47	0.31	0.12	0.906	0.705	0.866	0.306	0.895	0.649	0.919	0.783	0.941	0.845	0.8955	0.169197	0.912	0.152	0.867	0.152	0.901	0.152	0.928	0.152	0.935	0.152	0.18	0.23	0.62	0.64	0.21	0.06	0.18	0.18	0.57	0.56
CG12523	3110790732	618	dll	Dict	0.5128				0.22	0.84	0.07	0.09	0.13	0.893	0.691	0.855	0.319	0.882	0.626	0.902	0.775	0.916	0.881	0.8412	0.169197	0.894	0.152	0.854	0.152	0.885	0.152	0.911	0.152	0.924	0.152	0.68	0.66	0.07	0.15	0.59	0.59	0.03	0.11	0.06	0.04
CG12523	3110790732	618	dpp	Dict	0.5887				0.44	0.75	0.19	0.01	0.02	0.891	0.7	0.852	0.316	0.883	0.644	0.907	0.794	0.913	0.856	0.4649	0.169197	0.891	0.152	0.853	0.152	0.884	0.152	0.902	0.152	0.92	0.152	0.58	0.59	0.35	0.4	0.49	0.42	0.15	0.2	0.22	0.21
CG12523	3110795919	132	dsh	Dict	0.5429				0.68	0.51	0.24	0.14	0.1	0.91	0.72	0.873	0.33	0.9	0.649	0.92	0.793	0.934	0.84	1.1394	0.31216	0.91	0.152	0.871	0.152	0.9	0.152	0.923	0.152	0.937	0.152	0.68	0.66	0.19	0.35	0.33	0.27	0.26	0.26	0.32	0.3
CG12523	3110795919	132	egfr	Dict	0.636		*		0.7	0.16	0.09	0.25	0.03	0.856	0.625	0.805	0.283	0.849	0.568	0.871	0.727	0.881	0.797	0.9394	0.31216	0.846	0.152	0.794	0.152	0.834	0.152	0.864	0.152	0.892	0.152	0.11	0.12	0.18	0.37	0.69	0.62	0.11	0.15	0.33	0.32
CG12523	3110790732	618	egfr	Dict	0.6179				0.7	0.16	0.09	0.25	0.03	0.856	0.625	0.805	0.283	0.849	0.568	0.871	0.727	0.881	0.797	0.9394	0.169197	0.846	0.152	0.794	0.152	0.834	0.152	0.864	0.152	0.892	0.152	0.11	0.12	0.18	0.37	0.69	0.62	0.11	0.15	0.33	0.32
CG12523	3110795348	132	egfr	Dict	0.5947				0.7	0.16	0.09	0.25	0.03	0.856	0.625	0.805	0.283	0.849	0.568	0.871	0.727	0.881	0.797	0.9394	0.301309	0.846	0.152	0.794	0.152	0.834	0.152	0.864	0.152	0.892	0.152	0.11	0.12	0.18	0.37	0.69	0.62	0.11	0.15	0.33	0.32
CG12523	3110790732	618	emc	Dict	0.5536				0.54	0.06	0.44	0.37	0.03	0.797	0.601	0.752	0.255	0.791	0.535	0.833	0.683	0.848	0.776	0.3552	0.169197	0.815	0.152	0.761	0.152	0.801	0.152	0.836	0.152	0.867	0.152	0.15	0.08	0.65	0.67	0.07	0.11	0.07	0.06	0.31	0.3
CG12523	3110795919	132	fj	Dict	0.5275				0.84	0.35	0.16	0.16	0.06	0.938	0.763	0.909	0.355	0.932	0.705	0.952	0.857	0.956	0.929	2.0627	0.31216	0.928	0.152	0.894	0.152	0.921	0.152	0.941	0.152	0.953	0.152	0.59	0.54	0.46	0.61	0.39	0.27	0.29	0.29	0.37	0.34
CG12523	3110790732	618	foxo	Dict	0.6298		*		0.34	0.29	0.45	0.29	0	0.752	0.553	0.703	0.242	0.741	0.489	0.775	0.636	0.778	0.742	0.2659	0.169197	0.751	0.152	0.698	0.152	0.739	0.152	0.775	0.152	0.79	0.152	0.2	0.25	0.53	0.51	0.07	0.07	0.17	0.18	0.3	0.28
CG12523	3110790732	618	luna	Dict	0.5017				0.18	0.75	0.2	0.38	0.08	0.869	0.647	0.82	0.292	0.86	0.599	0.88	0.733	0.882	0.805	0.3695	0.169197	0.861	0.152	0.819	0.152	0.852	0.152	0.879	0.152	0.903	0.152	0.62	0.62	0.08	0.12	0.38	0.41	0.28	0.2	0.3	0.25
CG12523	3110790732	618	mad	Dict	0.6684				0.84	0.08	0.2	0.2	0.07	0.894	0.724	0.866	0.359	0.887	0.661	0.91	0.811	0.922	0.847	0.5446	0.169197	0.889	0.152	0.854	0.152	0.881	0.152	0.901	0.152	0.907	0.152	0.2	0.16	0.38	0.54	0.57	0.49	0.28	0.25	0.5	0.46
CG12523	3110795348	132	mad	Dict	0.6371				0.84	0.08	0.2	0.2	0.07	0.894	0.724	0.866	0.359	0.887	0.661	0.91	0.811	0.922	0.847	0.5446	0.301309	0.889	0.152	0.854	0.152	0.881	0.152	0.901	0.152	0.907	0.152	0.2	0.16	0.38	0.54	0.57	0.49	0.28	0.25	0.5	0.46
CG12523	3110795919	132	mad	Dict	0.6294				0.84	0.08	0.2	0.2	0.07	0.894	0.724	0.866	0.359	0.887	0.661	0.91	0.811	0.922	0.847	0.5446	0.31216	0.889	0.152	0.854	0.152	0.881	0.152	0.901	0.152	0.907	0.152	0.2	0.16	0.38	0.54	0.57	0.49	0.28	0.25	0.5	0.46
CG12523	3110795348	132	mer	Dict	0.5751				0.55	0.22	0.26	0.44	0.25	0.801	0.584	0.747	0.252	0.783	0.511	0.832	0.672	0.836	0.714	0.5311	0.301309	0.805	0.152	0.756	0.152	0.794	0.152	0.829	0.152	0.878	0.152	0.03	0.03	0.1	0.25	0.57	0.55	0.11	0.08	0.08	0.08
CG12523	3110795919	132	mer	Dict	0.5629				0.55	0.22	0.26	0.44	0.25	0.801	0.584	0.747	0.252	0.783	0.511	0.832	0.672	0.836	0.714	0.5311	0.31216	0.805	0.152	0.756	0.152	0.794	0.152	0.829	0.152	0.878	0.152	0.03	0.03	0.1	0.25	0.57	0.55	0.11	0.08	0.08	0.08
CG12523	3110795348	132	mrp	Dict	0.5093		*		0.36	0.11	0.15	0.49	0.18	0.724	0.477	0.653	0.187	0.71	0.413	0.754	0.571	0.812	0.696	0.4417	0.301309	0.738	0.152	0.668	0.152	0.72	0.152	0.771	0.152	0.835	0.152	0.15	0.19	0.14	0.05	0.65	0.63	0.32	0.36	0.01	0.01
CG12523	3110795348	132	os	Dict	0.5645				0.36	0.12	0.65	0.28	0	0.816	0.603	0.775	0.255	0.808	0.547	0.844	0.699	0.858	0.789	0.2858	0.301309	0.823	0.152	0.777	0.152	0.814	0.152	0.838	0.152	0.855	0.152	0.09	0.09	0.09	0.04	0.44	0.5	0.58	0.54	0.23	0.18
CG12523	3110790732	618	pnt	Dict	0.6191				0.28	0.69	0.03	0.39	0.09	0.858	0.653	0.816	0.281	0.853	0.584	0.873	0.772	0.886	0.829	0.9325	0.169197	0.843	0.152	0.802	0.152	0.836	0.152	0.865	0.152	0.891	0.152	0.52	0.53	0.21	0.26	0.4	0.37	0.11	0.04	0.34	0.29
CG12523	3110790732	618	rho	Dict	0.5892				0.42	0.64	0.27	0.24	0.06	0.883	0.676	0.842	0.302	0.873	0.632	0.896	0.784	0.901	0.867	0.6139	0.169197	0.882	0.152	0.835	0.152	0.87	0.152	0.895	0.152	0.913	0.152	0.45	0.44	0.28	0.37	0.56	0.47	0.39	0.44	0.18	0.17
CG12523	3110795348	132	rpt1	Dict	0.5439				0.04	0.25	0.66	0.15	0.07	0.793	0.555	0.721	0.245	0.77	0.503	0.816	0.623	0.817	0.725	0.264	0.301309	0.775	0.152	0.72	0.152	0.763	0.152	0.791	0.152	0.839	0.152	0.12	0.08	0.45	0.35	0.32	0.47	0.36	0.32	0.25	0.23
CG12523	3110790732	618	sav	Dict	0.569				0.34	0.81	0.01	0.18	0.13	0.914	0.732	0.873	0.328	0.904	0.656	0.928	0.795	0.931	0.931	0.5947	0.169197	0.909	0.152	0.868	0.152	0.902	0.152	0.929	0.152	0.952	0.152	0.58	0.56	0.05	0.15	0.59	0.59	0.16	0.23	0.3	0.28
CG12523	3110795348	132	sav	Dict	0.5229				0.34	0.81	0.01	0.18	0.13	0.914	0.732	0.873	0.328	0.904	0.656	0.928	0.795	0.931	0.931	0.5947	0.301309	0.909	0.152	0.868	0.152	0.902	0.152	0.929	0.152	0.952	0.152	0.58	0.56	0.05	0.15	0.59	0.59	0.16	0.23	0.3	0.28
CG12523	3110795348	132	sd	Muta	0.6002		*		0.58	0.16	0.17	0.41	0.11	0.76	0.568	0.706	0.264	0.746	0.497	0.791	0.631	0.798	0.704	0.009	0.301309	0.778	0.152	0.726	0.152	0.767	0.152	0.799	0.152	0.844	0.152	0.13	0.14	0.1	0.29	0.69	0.63	0.11	0.16	0.02	0.04
CG12523	3110795919	132	sd	Muta	0.5689		*		0.58	0.16	0.17	0.41	0.11	0.76	0.568	0.706	0.264	0.746	0.497	0.791	0.631	0.798	0.704	0.009	0.31216	0.778	0.152	0.726	0.152	0.767	0.152	0.799	0.152	0.844	0.152	0.13	0.14	0.1	0.29	0.69	0.63	0.11	0.16	0.02	0.04
CG12523	3110790732	618	sls	Dict	0.6403				0.72	0.33	0.05	0.14	0.22	0.84	0.68	0.801	0.314	0.832	0.622	0.857	0.744	0.874	0.801	0.5182	0.169197	0.839	0.152	0.799	0.152	0.832	0.152	0.859	0.152	0.883	0.152	0.03	0.07	0.46	0.61	0.64	0.52	0.12	0.06	0.21	0.16
CG12523	3110795348	132	sls	Dict	0.6117				0.72	0.33	0.05	0.14	0.22	0.84	0.68	0.801	0.314	0.832	0.622	0.857	0.744	0.874	0.801	0.5182	0.301309	0.839	0.152	0.799	0.152	0.832	0.152	0.859	0.152	0.883	0.152	0.03	0.07	0.46	0.61	0.64	0.52	0.12	0.06	0.21	0.16
CG12523	3110795919	132	sls	Dict	0.5276				0.72	0.33	0.05	0.14	0.22	0.84	0.68	0.801	0.314	0.832	0.622	0.857	0.744	0.874	0.801	0.5182	0.31216	0.839	0.152	0.799	0.152	0.832	0.152	0.859	0.152	0.883	0.152	0.03	0.07	0.46	0.61	0.64	0.52	0.12	0.06	0.21	0.16
CG12523	3110795919	132	socs36e	Dict	0.8341		**		0.74	0.08	0.47	0.09	0.11	0.886	0.717	0.854	0.333	0.88	0.654	0.898	0.808	0.901	0.891	0.4292	0.31216	0.88	0.152	0.846	0.152	0.872	0.152	0.895	0.152	0.911	0.152	0.19	0.17	0.15	0.33	0.64	0.63	0.43	0.39	0.26	0.24
CG12523	3110795348	132	socs36e	Dict	0.782		*		0.74	0.08	0.47	0.09	0.11	0.886	0.717	0.854	0.333	0.88	0.654	0.898	0.808	0.901	0.891	0.4292	0.301309	0.88	0.152	0.846	0.152	0.872	0.152	0.895	0.152	0.911	0.152	0.19	0.17	0.15	0.33	0.64	0.63	0.43	0.39	0.26	0.24
CG12523	3110795348	132	sog	Dict	0.6905		*		0.53	0.17	0.36	0.18	0.04	0.794	0.601	0.737	0.279	0.78	0.545	0.816	0.693	0.827	0.806	0.8503	0.301309	0.793	0.152	0.735	0.152	0.778	0.152	0.817	0.152	0.858	0.152	0.13	0.17	0.18	0.03	0.7	0.73	0.04	0.09	0.43	0.41
CG12523	3110795919	132	sog	Dict	0.6642		*		0.53	0.17	0.36	0.18	0.04	0.794	0.601	0.737	0.279	0.78	0.545	0.816	0.693	0.827	0.806	0.8503	0.31216	0.793	0.152	0.735	0.152	0.778	0.152	0.817	0.152	0.858	0.152	0.13	0.17	0.18	0.03	0.7	0.73	0.04	0.09	0.43	0.41
CG12523	3110790732	618	tai	Dict	0.6605				0.71	0.17	0.56	0.09	0.01	0.894	0.73	0.862	0.338	0.889	0.654	0.907	0.805	0.908	0.848	0.4654	0.169197	0.899	0.152	0.868	0.152	0.893	0.152	0.908	0.152	0.921	0.152	0	0.07	0.78	0.84	0.33	0.1	0.31	0.32	0.15	0.14
CG12523	3110790732	618	tango14	Dict	0.7019				0.87	0.17	0.08	0.09	0.3	0.899	0.736	0.871	0.356	0.894	0.669	0.914	0.821	0.916	0.86	1.4426	0.169197	0.909	0.152	0.875	0.152	0.902	0.152	0.923	0.152	0.932	0.152	0.16	0.13	0.48	0.67	0.77	0.62	0.08	0.02	0.09	0.05
CG12523	3110795348	132	tango14	Dict	0.633				0.87	0.17	0.08	0.09	0.3	0.899	0.736	0.871	0.356	0.894	0.669	0.914	0.821	0.916	0.86	1.4426	0.301309	0.909	0.152	0.875	0.152	0.902	0.152	0.923	0.152	0.932	0.152	0.16	0.13	0.48	0.67	0.77	0.62	0.08	0.02	0.09	0.05
CG12523	3110795919	132	tango14	Dict	0.6037				0.87	0.17	0.08	0.09	0.3	0.899	0.736	0.871	0.356	0.894	0.669	0.914	0.821	0.916	0.86	1.4426	0.31216	0.909	0.152	0.875	0.152	0.902	0.152	0.923	0.152	0.932	0.152	0.16	0.13	0.48	0.67	0.77	0.62	0.08	0.02	0.09	0.05
CG12541	1006947075	30	brk	Dict	0.6031				0.23	0.77	0.25	0.5	0.11	0.919	0.718	0.886	0.323	0.914	0.651	0.937	0.802	0.946	0.885	2.1159	0.257241	0.925	0.152	0.883	0.152	0.916	0.152	0.939	0.152	0.957	0.152	0.69	0.71	0.37	0.36	0.24	0.17	0.03	0.08	0.36	0.33
CG12541	1006947075	30	bun	Dict	0.5316				0.18	0.78	0.06	0.17	0.19	0.885	0.664	0.841	0.31	0.875	0.609	0.91	0.742	0.935	0.885	0.7822	0.257241	0.887	0.152	0.834	0.152	0.874	0.152	0.905	0.152	0.925	0.152	0.54	0.52	0.04	0.14	0.61	0.58	0.13	0.22	0.05	0.09
CG12541	1006947075	30	bx	Dict	0.5682				0.2	0.83	0.2	0.29	0.05	0.899	0.714	0.867	0.309	0.895	0.651	0.907	0.792	0.914	0.858	1.1999	0.257241	0.901	0.152	0.863	0.152	0.894	0.152	0.918	0.152	0.934	0.152	0.79	0.8	0.29	0.26	0.25	0.22	0.02	0.06	0.34	0.32
CG12541	1006947075	30	chn	Dict	0.5192				0.57	0.17	0.13	0.45	0.34	0.826	0.601	0.773	0.271	0.817	0.544	0.858	0.702	0.881	0.766	0.9439	0.257241	0.824	0.152	0.768	0.152	0.81	0.152	0.847	0.152	0.865	0.152	0.02	0.02	0.44	0.53	0.4	0.27	0.03	0.06	0.35	0.31
CG12541	1006947075	30	d	Dict	0.5711		*		0.16	0.46	0.09	0.05	0.56	0.732	0.49	0.664	0.199	0.718	0.433	0.759	0.581	0.795	0.674	0.2325	0.257241	0.728	0.152	0.67	0.152	0.715	0.152	0.75	0.152	0.79	0.152	0.42	0.39	0.05	0.02	0.29	0.29	0.05	0.03	0.37	0.4
CG12541	1006947075	30	dad	Dict	0.6501				0.6	0.35	0.36	0.11	0.33	0.869	0.651	0.825	0.301	0.858	0.591	0.884	0.743	0.901	0.864	0.3276	0.257241	0.857	0.152	0.812	0.152	0.849	0.152	0.877	0.152	0.897	0.152	0.02	0.03	0.18	0.36	0.74	0.69	0.29	0.21	0.1	0.04
CG12541	1006947075	30	dll	Dict	0.5502				0.22	0.84	0.07	0.09	0.13	0.893	0.691	0.855	0.319	0.882	0.626	0.902	0.775	0.916	0.881	0.8412	0.257241	0.894	0.152	0.854	0.152	0.885	0.152	0.911	0.152	0.924	0.152	0.68	0.66	0.07	0.15	0.59	0.59	0.03	0.11	0.06	0.04
CG12541	1006947075	30	dpp	Dict	0.5007				0.44	0.75	0.19	0.01	0.02	0.891	0.7	0.852	0.316	0.883	0.644	0.907	0.794	0.913	0.856	0.4649	0.257241	0.891	0.152	0.853	0.152	0.884	0.152	0.902	0.152	0.92	0.152	0.58	0.59	0.35	0.4	0.49	0.42	0.15	0.2	0.22	0.21
CG12541	1006947075	30	kni	Dict	0.581		*		0.08	0.39	0.31	0.54	0.03	0.798	0.528	0.732	0.217	0.778	0.462	0.84	0.638	0.859	0.778	0.3592	0.257241	0.808	0.152	0.738	0.152	0.795	0.152	0.832	0.152	0.852	0.152	0.34	0.32	0.13	0.12	0.16	0.25	0.41	0.36	0.44	0.41
CG12541	1006947075	30	luna	Dict	0.6903		*		0.18	0.75	0.2	0.38	0.08	0.869	0.647	0.82	0.292	0.86	0.599	0.88	0.733	0.882	0.805	0.3695	0.257241	0.861	0.152	0.819	0.152	0.852	0.152	0.879	0.152	0.903	0.152	0.62	0.62	0.08	0.12	0.38	0.41	0.28	0.2	0.3	0.25
CG12541	1006947075	30	med	Dict	0.5338				0.17	0.63	0.24	0.37	0.19	0.855	0.625	0.8	0.281	0.843	0.558	0.875	0.718	0.896	0.847	0.768	0.257241	0.84	0.152	0.789	0.152	0.828	0.152	0.862	0.152	0.893	0.152	0.54	0.51	0.21	0.19	0.24	0.32	0.14	0.06	0.15	0.1
CG12541	1006947075	30	mpk2	Dict	0.5222				0.18	0.68	0.09	0.37	0.15	0.846	0.633	0.806	0.278	0.839	0.57	0.862	0.742	0.889	0.829	0.4463	0.257241	0.849	0.152	0.797	0.152	0.837	0.152	0.878	0.152	0.903	0.152	0.61	0.59	0.05	0.06	0.23	0.26	0.05	0.09	0.59	0.58
CG12541	1006947075	30	pnt	Dict	0.6843		*		0.28	0.69	0.03	0.39	0.09	0.858	0.653	0.816	0.281	0.853	0.584	0.873	0.772	0.886	0.829	0.9325	0.257241	0.843	0.152	0.802	0.152	0.836	0.152	0.865	0.152	0.891	0.152	0.52	0.53	0.21	0.26	0.4	0.37	0.11	0.04	0.34	0.29
CG12541	1006947075	30	ser	Dict	0.6278				0.11	0.78	0.3	0.27	0.16	0.893	0.688	0.842	0.31	0.879	0.621	0.905	0.793	0.918	0.869	0.4217	0.257241	0.876	0.152	0.833	0.152	0.868	0.152	0.891	0.152	0.919	0.152	0.69	0.66	0.2	0.16	0.36	0.45	0.2	0.11	0.1	0.06
CG12541	1006947075	30	sls	Dict	0.5233				0.72	0.33	0.05	0.14	0.22	0.84	0.68	0.801	0.314	0.832	0.622	0.857	0.744	0.874	0.801	0.5182	0.257241	0.839	0.152	0.799	0.152	0.832	0.152	0.859	0.152	0.883	0.152	0.03	0.07	0.46	0.61	0.64	0.52	0.12	0.06	0.21	0.16
CG12541	1006947075	30	ubx	Dict	0.5416				0.45	0.7	0.38	0.06	0.15	0.916	0.737	0.881	0.325	0.908	0.669	0.924	0.823	0.952	0.891	0.6049	0.257241	0.91	0.152	0.876	0.152	0.902	0.152	0.929	0.152	0.943	0.152	0.74	0.7	0.38	0.42	0.12	0.27	0.29	0.22	0.23	0.25
CG12782	2219146493	465	brk	Dict	0.633				0.23	0.77	0.25	0.5	0.11	0.919	0.718	0.886	0.323	0.914	0.651	0.937	0.802	0.946	0.885	2.1159	0.537202	0.925	0.152	0.883	0.152	0.916	0.152	0.939	0.152	0.957	0.152	0.69	0.71	0.37	0.36	0.24	0.17	0.03	0.08	0.36	0.33
CG12782	2219146493	465	bx	Dict	0.5703				0.2	0.83	0.2	0.29	0.05	0.899	0.714	0.867	0.309	0.895	0.651	0.907	0.792	0.914	0.858	1.1999	0.537202	0.901	0.152	0.863	0.152	0.894	0.152	0.918	0.152	0.934	0.152	0.79	0.8	0.29	0.26	0.25	0.22	0.02	0.06	0.34	0.32
CG12782	2219146493	465	cyce	Dict	0.6421				0.06	0.47	0.74	0.25	0.09	0.906	0.718	0.874	0.309	0.899	0.652	0.925	0.798	0.928	0.888	0.9349	0.537202	0.901	0.152	0.857	0.152	0.891	0.152	0.92	0.152	0.936	0.152	0.46	0.5	0.47	0.39	0.06	0.21	0.54	0.55	0.2	0.19
CG12782	2219146493	465	dgo	Dict	0.5351				0.31	0.6	0.04	0.22	0.16	0.815	0.614	0.762	0.276	0.801	0.553	0.832	0.684	0.856	0.801	0.4284	0.537202	0.789	0.152	0.742	0.152	0.777	0.152	0.819	0.152	0.84	0.152	0.66	0.61	0.24	0.26	0.17	0.23	0.22	0.26	0.23	0.21
CG12782	2219146493	465	dlp	Dict	0.581				0.22	0.56	0.21	0.39	0.18	0.845	0.586	0.784	0.258	0.829	0.528	0.86	0.691	0.881	0.769	0.9958	0.537202	0.815	0.152	0.755	0.152	0.8	0.152	0.84	0.152	0.86	0.152	0.56	0.54	0.26	0.3	0.02	0.14	0.16	0.13	0.33	0.32
CG12782	2219146493	465	ds	Dict	0.7511				0.39	0.84	0.12	0.23	0.09	0.937	0.759	0.903	0.356	0.929	0.684	0.943	0.852	0.947	0.903	5.7655	0.537202	0.932	0.152	0.898	0.152	0.925	0.152	0.944	0.152	0.956	0.152	0.89	0.85	0.21	0.26	0.14	0.21	0.26	0.31	0.22	0.21
CG12782	2219146493	465	dsh	Dict	0.7595		*		0.68	0.51	0.24	0.14	0.1	0.91	0.72	0.873	0.33	0.9	0.649	0.92	0.793	0.934	0.84	1.1394	0.537202	0.91	0.152	0.871	0.152	0.9	0.152	0.923	0.152	0.937	0.152	0.68	0.66	0.19	0.35	0.33	0.27	0.26	0.26	0.32	0.3
CG12782	2219146493	465	ex	Dict	0.682				0.04	0.82	0.43	0.12	0.04	0.914	0.73	0.883	0.322	0.91	0.661	0.92	0.832	0.947	0.875	5.4462	0.537202	0.918	0.152	0.88	0.152	0.909	0.152	0.929	0.152	0.944	0.152	0.82	0.81	0.21	0.17	0.21	0.15	0.42	0.47	0.01	0.01
CG12782	2219146493	465	fj	Dict	0.7024				0.84	0.35	0.16	0.16	0.06	0.938	0.763	0.909	0.355	0.932	0.705	0.952	0.857	0.956	0.929	2.0627	0.537202	0.928	0.152	0.894	0.152	0.921	0.152	0.941	0.152	0.953	0.152	0.59	0.54	0.46	0.61	0.39	0.27	0.29	0.29	0.37	0.34
CG12782	2219146493	465	ft	Dict	0.6072				0.39	0.75	0.08	0.35	0.1	0.927	0.72	0.889	0.323	0.919	0.649	0.933	0.808	0.941	0.888	4.3023	0.537202	0.916	0.152	0.877	0.152	0.907	0.152	0.938	0.152	0.95	0.152	0.77	0.7	0.42	0.43	0.25	0.36	0.22	0.28	0.21	0.2
CG12782	2219146493	465	fz	Dict	0.5496				0.06	0.7	0.17	0.26	0.24	0.85	0.643	0.804	0.281	0.839	0.574	0.861	0.74	0.866	0.798	0.4509	0.537202	0.841	0.152	0.79	0.152	0.826	0.152	0.861	0.152	0.882	0.152	0.77	0.78	0.15	0.08	0.06	0.08	0.02	0.03	0.39	0.4
CG12782	2219146493	465	hpo	Dict	0.59		*		0.4	0.22	0.22	0.18	0.14	0.782	0.521	0.706	0.219	0.762	0.468	0.822	0.631	0.829	0.822	0.3556	0.537202	0.755	0.152	0.68	0.152	0.736	0.152	0.794	0.152	0.822	0.152	0.33	0.33	0.09	0.2	0.34	0.31	0.21	0.19	0.06	0.07
CG12782	2219146493	465	mats	Dict	0.5823				0.58	0.58	0.2	0.15	0.19	0.892	0.685	0.853	0.318	0.882	0.628	0.899	0.766	0.9	0.866	3.5887	0.537202	0.884	0.152	0.843	0.152	0.875	0.152	0.897	0.152	0.918	0.152	0.72	0.65	0.54	0.62	0.07	0.12	0.01	0.04	0.07	0.04
CG12782	2219146493	465	med	Dict	0.5792				0.17	0.63	0.24	0.37	0.19	0.855	0.625	0.8	0.281	0.843	0.558	0.875	0.718	0.896	0.847	0.768	0.537202	0.84	0.152	0.789	0.152	0.828	0.152	0.862	0.152	0.893	0.152	0.54	0.51	0.21	0.19	0.24	0.32	0.14	0.06	0.15	0.1
CG12782	2219146493	465	nmo	Dict	0.879		**		0.31	0.81	0.35	0.29	0.15	0.94	0.734	0.907	0.346	0.934	0.656	0.96	0.831	0.961	0.909	2.0873	0.537202	0.938	0.152	0.902	0.152	0.931	0.152	0.953	0.152	0.963	0.152	0.92	0.92	0.07	0.06	0.16	0.13	0.17	0.2	0.2	0.2
CG12782	2219146493	465	sd	Dict	0.5085				0.34	0.63	0.37	0.24	0.02	0.856	0.667	0.823	0.286	0.851	0.597	0.87	0.767	0.871	0.849	5.3633	0.537202	0.87	0.152	0.824	0.152	0.861	0.152	0.885	0.152	0.905	0.152	0.7	0.64	0.42	0.45	0.08	0.25	0.3	0.25	0.11	0.09
CG12782	2219146493	465	ser	Dict	0.5942				0.11	0.78	0.3	0.27	0.16	0.893	0.688	0.842	0.31	0.879	0.621	0.905	0.793	0.918	0.869	0.4217	0.537202	0.876	0.152	0.833	0.152	0.868	0.152	0.891	0.152	0.919	0.152	0.69	0.66	0.2	0.16	0.36	0.45	0.2	0.11	0.1	0.06
CG12782	2219146493	465	socs36e	Dict	0.5271				0.74	0.08	0.47	0.09	0.11	0.886	0.717	0.854	0.333	0.88	0.654	0.898	0.808	0.901	0.891	0.4292	0.537202	0.88	0.152	0.846	0.152	0.872	0.152	0.895	0.152	0.911	0.152	0.19	0.17	0.15	0.33	0.64	0.63	0.43	0.39	0.26	0.24
CG12782	2219146493	465	stan	Dict	0.5229				0.2	0.44	0.52	0.16	0.03	0.797	0.577	0.744	0.261	0.787	0.515	0.815	0.663	0.834	0.797	0.2999	0.537202	0.795	0.152	0.741	0.152	0.785	0.152	0.827	0.152	0.875	0.152	0.48	0.46	0.11	0.04	0.08	0.12	0.49	0.5	0.04	0.02
CG12782	2219146493	465	tmod	Dict	0.6563		*		0.2	0.49	0.1	0.6	0.13	0.821	0.592	0.765	0.243	0.814	0.518	0.84	0.668	0.868	0.753	0.6584	0.537202	0.822	0.152	0.761	0.152	0.81	0.152	0.852	0.152	0.876	0.152	0.57	0.56	0.02	0.09	0.05	0.01	0.01	0.04	0.36	0.34
CG12782	2219146493	465	tx	Dict	0.7097				0.06	0.74	0.53	0.01	0.18	0.914	0.73	0.868	0.33	0.9	0.655	0.928	0.801	0.928	0.839	0.9684	0.537202	0.903	0.152	0.866	0.152	0.895	0.152	0.917	0.152	0.929	0.152	0.74	0.75	0.23	0.15	0.01	0.04	0.43	0.45	0.19	0.2
CG12782	2219146493	465	ubx	Dict	0.6043				0.45	0.7	0.38	0.06	0.15	0.916	0.737	0.881	0.325	0.908	0.669	0.924	0.823	0.952	0.891	0.6049	0.537202	0.91	0.152	0.876	0.152	0.902	0.152	0.929	0.152	0.943	0.152	0.74	0.7	0.38	0.42	0.12	0.27	0.29	0.22	0.23	0.25
CG12782	2219146493	465	wg	Dict	0.628		*		0.35	0.58	0.01	0.12	0.19	0.778	0.575	0.724	0.25	0.762	0.522	0.796	0.661	0.804	0.737	1.6659	0.537202	0.776	0.152	0.726	0.152	0.764	0.152	0.798	0.152	0.846	0.152	0.62	0.59	0.24	0.31	0.06	0.04	0.13	0.15	0.18	0.17
CG12782	2219146493	465	wts	Dict	0.7994		*		0.36	0.69	0.38	0.08	0.22	0.894	0.718	0.857	0.324	0.886	0.645	0.917	0.809	0.926	0.882	0.9344	0.537202	0.887	0.152	0.845	0.152	0.877	0.152	0.901	0.152	0.918	0.152	0.79	0.77	0.09	0.2	0.16	0.12	0.41	0.42	0.22	0.24
CG12934	2206539191	327	btd	Dict	0.5456				0.83	0.17	0.22	0.01	0.09	0.891	0.703	0.854	0.334	0.882	0.638	0.904	0.803	0.91	0.863	0.5246	0.190776	0.889	0.152	0.851	0.152	0.882	0.152	0.899	0.152	0.921	0.152	0.06	0.02	0.53	0.66	0.51	0.36	0.14	0.16	0.45	0.44
CG12934	2206539555	327	btd	Dict	0.5074				0.83	0.17	0.22	0.01	0.09	0.891	0.703	0.854	0.334	0.882	0.638	0.904	0.803	0.91	0.863	0.5246	0.448484	0.889	0.152	0.851	0.152	0.882	0.152	0.899	0.152	0.921	0.152	0.06	0.02	0.53	0.66	0.51	0.36	0.14	0.16	0.45	0.44
CG12934	2206539191	327	cg34394	Dict	0.5727		*		0.47	0.1	0.1	0.25	0.48	0.803	0.521	0.728	0.219	0.777	0.464	0.823	0.611	0.862	0.716	2.1385	0.190776	0.804	0.152	0.728	0.152	0.785	0.152	0.843	0.152	0.876	0.152	0.11	0.08	0.38	0.51	0.58	0.42	0.19	0.24	0.3	0.32
CG12934	2206539191	327	chn	Dict	0.6016		*		0.57	0.17	0.13	0.45	0.34	0.826	0.601	0.773	0.271	0.817	0.544	0.858	0.702	0.881	0.766	0.9439	0.190776	0.824	0.152	0.768	0.152	0.81	0.152	0.847	0.152	0.865	0.152	0.02	0.02	0.44	0.53	0.4	0.27	0.03	0.06	0.35	0.31
CG12934	2206539555	327	ct	Muta	0.5464		*		0.54	0.02	0.38	0.03	0.09	0.705	0.538	0.664	0.253	0.701	0.484	0.718	0.607	0.733	0.65	0.0056	0.448484	0.715	0.152	0.672	0.152	0.705	0.152	0.731	0.152	0.766	0.152	0.12	0.08	0.47	0.51	0.18	0.03	0.25	0.22	0.25	0.27
CG12934	2206539191	327	ct	Muta	0.5369				0.54	0.02	0.38	0.03	0.09	0.705	0.538	0.664	0.253	0.701	0.484	0.718	0.607	0.733	0.65	0.0056	0.190776	0.715	0.152	0.672	0.152	0.705	0.152	0.731	0.152	0.766	0.152	0.12	0.08	0.47	0.51	0.18	0.03	0.25	0.22	0.25	0.27
CG12934	2206539555	327	dally	Dict	0.5505				0.64	0.29	0.47	0.31	0.12	0.906	0.705	0.866	0.306	0.895	0.649	0.919	0.783	0.941	0.845	0.8955	0.448484	0.912	0.152	0.867	0.152	0.901	0.152	0.928	0.152	0.935	0.152	0.18	0.23	0.62	0.64	0.21	0.06	0.18	0.18	0.57	0.56
CG12934	2206539191	327	dally	Dict	0.5474				0.64	0.29	0.47	0.31	0.12	0.906	0.705	0.866	0.306	0.895	0.649	0.919	0.783	0.941	0.845	0.8955	0.190776	0.912	0.152	0.867	0.152	0.901	0.152	0.928	0.152	0.935	0.152	0.18	0.23	0.62	0.64	0.21	0.06	0.18	0.18	0.57	0.56
CG12934	2206539555	327	dco	Dict	0.5625		*		0.23	0.23	0.11	0.84	0.13	0.829	0.53	0.77	0.204	0.815	0.449	0.846	0.65	0.848	0.815	0.6512	0.448484	0.845	0.152	0.775	0.152	0.828	0.152	0.872	0.152	0.891	0.152	0.18	0.13	0.33	0.29	0.18	0.25	0.24	0.26	0.44	0.41
CG12934	2206539390	326	dgo	Dict	0.6378		*		0.31	0.6	0.04	0.22	0.16	0.815	0.614	0.762	0.276	0.801	0.553	0.832	0.684	0.856	0.801	0.4284	0.0379835	0.789	0.152	0.742	0.152	0.777	0.152	0.819	0.152	0.84	0.152	0.66	0.61	0.24	0.26	0.17	0.23	0.22	0.26	0.23	0.21
CG12934	2206539555	327	dgo	Dict	0.502				0.31	0.6	0.04	0.22	0.16	0.815	0.614	0.762	0.276	0.801	0.553	0.832	0.684	0.856	0.801	0.4284	0.448484	0.789	0.152	0.742	0.152	0.777	0.152	0.819	0.152	0.84	0.152	0.66	0.61	0.24	0.26	0.17	0.23	0.22	0.26	0.23	0.21
CG12934	2206539390	326	ds	Dict	0.6492				0.39	0.84	0.12	0.23	0.09	0.937	0.759	0.903	0.356	0.929	0.684	0.943	0.852	0.947	0.903	5.7655	0.0379835	0.932	0.152	0.898	0.152	0.925	0.152	0.944	0.152	0.956	0.152	0.89	0.85	0.21	0.26	0.14	0.21	0.26	0.31	0.22	0.21
CG12934	2206539555	327	ds	Dict	0.5836				0.39	0.84	0.12	0.23	0.09	0.937	0.759	0.903	0.356	0.929	0.684	0.943	0.852	0.947	0.903	5.7655	0.448484	0.932	0.152	0.898	0.152	0.925	0.152	0.944	0.152	0.956	0.152	0.89	0.85	0.21	0.26	0.14	0.21	0.26	0.31	0.22	0.21
CG12934	2206539555	327	emc	Dict	0.652		*		0.54	0.06	0.44	0.37	0.03	0.797	0.601	0.752	0.255	0.791	0.535	0.833	0.683	0.848	0.776	0.3552	0.448484	0.815	0.152	0.761	0.152	0.801	0.152	0.836	0.152	0.867	0.152	0.15	0.08	0.65	0.67	0.07	0.11	0.07	0.06	0.31	0.3
CG12934	2206539191	327	emc	Dict	0.6387		*		0.54	0.06	0.44	0.37	0.03	0.797	0.601	0.752	0.255	0.791	0.535	0.833	0.683	0.848	0.776	0.3552	0.190776	0.815	0.152	0.761	0.152	0.801	0.152	0.836	0.152	0.867	0.152	0.15	0.08	0.65	0.67	0.07	0.11	0.07	0.06	0.31	0.3
CG12934	2206539390	326	fj	Dict	0.6931				0.84	0.35	0.16	0.16	0.06	0.938	0.763	0.909	0.355	0.932	0.705	0.952	0.857	0.956	0.929	2.0627	0.0379835	0.928	0.152	0.894	0.152	0.921	0.152	0.941	0.152	0.953	0.152	0.59	0.54	0.46	0.61	0.39	0.27	0.29	0.29	0.37	0.34
CG12934	2206539555	327	fj	Dict	0.5513				0.84	0.35	0.16	0.16	0.06	0.938	0.763	0.909	0.355	0.932	0.705	0.952	0.857	0.956	0.929	2.0627	0.448484	0.928	0.152	0.894	0.152	0.921	0.152	0.941	0.152	0.953	0.152	0.59	0.54	0.46	0.61	0.39	0.27	0.29	0.29	0.37	0.34
CG12934	2206539555	327	ft	Dict	0.7169				0.39	0.75	0.08	0.35	0.1	0.927	0.72	0.889	0.323	0.919	0.649	0.933	0.808	0.941	0.888	4.3023	0.448484	0.916	0.152	0.877	0.152	0.907	0.152	0.938	0.152	0.95	0.152	0.77	0.7	0.42	0.43	0.25	0.36	0.22	0.28	0.21	0.2
CG12934	2206539390	326	ft	Dict	0.6674				0.39	0.75	0.08	0.35	0.1	0.927	0.72	0.889	0.323	0.919	0.649	0.933	0.808	0.941	0.888	4.3023	0.0379835	0.916	0.152	0.877	0.152	0.907	0.152	0.938	0.152	0.95	0.152	0.77	0.7	0.42	0.43	0.25	0.36	0.22	0.28	0.21	0.2
CG12934	2206539390	326	kn	Dict	0.5869				0.64	0.28	0.11	0.11	0.28	0.824	0.637	0.777	0.296	0.81	0.565	0.844	0.703	0.867	0.779	0.3931	0.0379835	0.815	0.152	0.763	0.152	0.803	0.152	0.833	0.152	0.858	0.152	0.43	0.39	0.35	0.43	0.14	0.05	0.01	0.04	0.51	0.51
CG12934	2206539555	327	kn	Dict	0.548				0.64	0.28	0.11	0.11	0.28	0.824	0.637	0.777	0.296	0.81	0.565	0.844	0.703	0.867	0.779	0.3931	0.448484	0.815	0.152	0.763	0.152	0.803	0.152	0.833	0.152	0.858	0.152	0.43	0.39	0.35	0.43	0.14	0.05	0.01	0.04	0.51	0.51
CG12934	2206539555	327	mats	Dict	0.7693		**		0.58	0.58	0.2	0.15	0.19	0.892	0.685	0.853	0.318	0.882	0.628	0.899	0.766	0.9	0.866	3.5887	0.448484	0.884	0.152	0.843	0.152	0.875	0.152	0.897	0.152	0.918	0.152	0.72	0.65	0.54	0.62	0.07	0.12	0.01	0.04	0.07	0.04
CG12934	2206539390	326	mats	Dict	0.694		*		0.58	0.58	0.2	0.15	0.19	0.892	0.685	0.853	0.318	0.882	0.628	0.899	0.766	0.9	0.866	3.5887	0.0379835	0.884	0.152	0.843	0.152	0.875	0.152	0.897	0.152	0.918	0.152	0.72	0.65	0.54	0.62	0.07	0.12	0.01	0.04	0.07	0.04
CG12934	2206539191	327	mats	Dict	0.6833				0.58	0.58	0.2	0.15	0.19	0.892	0.685	0.853	0.318	0.882	0.628	0.899	0.766	0.9	0.866	3.5887	0.190776	0.884	0.152	0.843	0.152	0.875	0.152	0.897	0.152	0.918	0.152	0.72	0.65	0.54	0.62	0.07	0.12	0.01	0.04	0.07	0.04
CG12934	2206539191	327	neur	Dict	0.5568		*		0.45	0.24	0.14	0.21	0.46	0.814	0.539	0.742	0.227	0.798	0.476	0.833	0.64	0.843	0.761	2.4309	0.190776	0.81	0.152	0.744	0.152	0.797	0.152	0.841	0.152	0.868	0.152	0.06	0.09	0.43	0.54	0.56	0.4	0.18	0.23	0.3	0.32
CG12934	2206539555	327	s6k	Dict	0.5857		*		0.41	0.16	0.42	0.15	0.43	0.797	0.575	0.75	0.247	0.785	0.514	0.818	0.673	0.836	0.777	0.3905	0.448484	0.79	0.152	0.728	0.152	0.774	0.152	0.814	0.152	0.852	0.152	0.22	0.16	0.48	0.46	0.17	0.29	0.14	0.09	0.47	0.48
CG12934	2206539390	326	s6k	Dict	0.5441				0.41	0.16	0.42	0.15	0.43	0.797	0.575	0.75	0.247	0.785	0.514	0.818	0.673	0.836	0.777	0.3905	0.0379835	0.79	0.152	0.728	0.152	0.774	0.152	0.814	0.152	0.852	0.152	0.22	0.16	0.48	0.46	0.17	0.29	0.14	0.09	0.47	0.48
CG12934	2206539390	326	sd	Dict	0.6777		*		0.34	0.63	0.37	0.24	0.02	0.856	0.667	0.823	0.286	0.851	0.597	0.87	0.767	0.871	0.849	5.3633	0.0379835	0.87	0.152	0.824	0.152	0.861	0.152	0.885	0.152	0.905	0.152	0.7	0.64	0.42	0.45	0.08	0.25	0.3	0.25	0.11	0.09
CG12934	2206539555	327	sd	Dict	0.6508				0.34	0.63	0.37	0.24	0.02	0.856	0.667	0.823	0.286	0.851	0.597	0.87	0.767	0.871	0.849	5.3633	0.448484	0.87	0.152	0.824	0.152	0.861	0.152	0.885	0.152	0.905	0.152	0.7	0.64	0.42	0.45	0.08	0.25	0.3	0.25	0.11	0.09
CG12934	2206539191	327	sd	Dict	0.5615				0.34	0.63	0.37	0.24	0.02	0.856	0.667	0.823	0.286	0.851	0.597	0.87	0.767	0.871	0.849	5.3633	0.190776	0.87	0.152	0.824	0.152	0.861	0.152	0.885	0.152	0.905	0.152	0.7	0.64	0.42	0.45	0.08	0.25	0.3	0.25	0.11	0.09
CG12934	2206539390	326	stg	Dict	0.5279				0.25	0.54	0.35	0.48	0.09	0.864	0.657	0.816	0.263	0.854	0.585	0.882	0.756	0.884	0.858	1.0297	0.0379835	0.866	0.152	0.81	0.152	0.852	0.152	0.889	0.152	0.914	0.152	0.63	0.59	0.01	0.07	0.07	0.06	0.41	0.44	0.37	0.33
CG12934	2206539191	327	tai	Dict	0.69				0.71	0.17	0.56	0.09	0.01	0.894	0.73	0.862	0.338	0.889	0.654	0.907	0.805	0.908	0.848	0.4654	0.190776	0.899	0.152	0.868	0.152	0.893	0.152	0.908	0.152	0.921	0.152	0	0.07	0.78	0.84	0.33	0.1	0.31	0.32	0.15	0.14
CG12934	2206539555	327	tai	Dict	0.6187				0.71	0.17	0.56	0.09	0.01	0.894	0.73	0.862	0.338	0.889	0.654	0.907	0.805	0.908	0.848	0.4654	0.448484	0.899	0.152	0.868	0.152	0.893	0.152	0.908	0.152	0.921	0.152	0	0.07	0.78	0.84	0.33	0.1	0.31	0.32	0.15	0.14
CG12934	2206539191	327	tango14	Dict	0.5072				0.87	0.17	0.08	0.09	0.3	0.899	0.736	0.871	0.356	0.894	0.669	0.914	0.821	0.916	0.86	1.4426	0.190776	0.909	0.152	0.875	0.152	0.902	0.152	0.923	0.152	0.932	0.152	0.16	0.13	0.48	0.67	0.77	0.62	0.08	0.02	0.09	0.05
CG12934	2206539555	327	ubx	Dict	0.7313				0.45	0.7	0.38	0.06	0.15	0.916	0.737	0.881	0.325	0.908	0.669	0.924	0.823	0.952	0.891	0.6049	0.448484	0.91	0.152	0.876	0.152	0.902	0.152	0.929	0.152	0.943	0.152	0.74	0.7	0.38	0.42	0.12	0.27	0.29	0.22	0.23	0.25
CG12934	2206539191	327	ubx	Dict	0.5639				0.45	0.7	0.38	0.06	0.15	0.916	0.737	0.881	0.325	0.908	0.669	0.924	0.823	0.952	0.891	0.6049	0.190776	0.91	0.152	0.876	0.152	0.902	0.152	0.929	0.152	0.943	0.152	0.74	0.7	0.38	0.42	0.12	0.27	0.29	0.22	0.23	0.25
CG12934	2206539390	326	ubx	Dict	0.5547				0.45	0.7	0.38	0.06	0.15	0.916	0.737	0.881	0.325	0.908	0.669	0.924	0.823	0.952	0.891	0.6049	0.0379835	0.91	0.152	0.876	0.152	0.902	0.152	0.929	0.152	0.943	0.152	0.74	0.7	0.38	0.42	0.12	0.27	0.29	0.22	0.23	0.25
CG12991	1017480282	94	aret	Dict	0.5466				0.66	0.06	0.37	0.12	0	0.844	0.652	0.797	0.293	0.836	0.595	0.861	0.737	0.868	0.861	0.4688	0.347692	0.843	0.152	0.795	0.152	0.833	0.152	0.863	0.152	0.885	0.152	0.22	0.23	0.02	0.18	0.65	0.65	0.14	0.1	0.52	0.5
CG12991	1017480282	94	cg8654	Dict	0.5404				0.63	0.1	0.2	0.08	0.1	0.738	0.574	0.696	0.263	0.73	0.517	0.775	0.637	0.797	0.705	0.4142	0.347692	0.749	0.152	0.7	0.152	0.738	0.152	0.77	0.152	0.818	0.152	0.14	0.12	0.15	0.3	0.49	0.46	0.09	0.08	0.45	0.44
CG12991	1017480282	94	egfr	Dict	0.6395		*		0.7	0.16	0.09	0.25	0.03	0.856	0.625	0.805	0.283	0.849	0.568	0.871	0.727	0.881	0.797	0.9394	0.347692	0.846	0.152	0.794	0.152	0.834	0.152	0.864	0.152	0.892	0.152	0.11	0.12	0.18	0.37	0.69	0.62	0.11	0.15	0.33	0.32
CG12991	1017480282	94	mer	Dict	0.7544		**		0.55	0.22	0.26	0.44	0.25	0.801	0.584	0.747	0.252	0.783	0.511	0.832	0.672	0.836	0.714	0.5311	0.347692	0.805	0.152	0.756	0.152	0.794	0.152	0.829	0.152	0.878	0.152	0.03	0.03	0.1	0.25	0.57	0.55	0.11	0.08	0.08	0.08
CG12991	1017480282	94	mrp	Dict	0.5193		*		0.36	0.11	0.15	0.49	0.18	0.724	0.477	0.653	0.187	0.71	0.413	0.754	0.571	0.812	0.696	0.4417	0.347692	0.738	0.152	0.668	0.152	0.72	0.152	0.771	0.152	0.835	0.152	0.15	0.19	0.14	0.05	0.65	0.63	0.32	0.36	0.01	0.01
CG12991	1017480282	94	sd	Muta	0.5822		*		0.58	0.16	0.17	0.41	0.11	0.76	0.568	0.706	0.264	0.746	0.497	0.791	0.631	0.798	0.704	0.009	0.347692	0.778	0.152	0.726	0.152	0.767	0.152	0.799	0.152	0.844	0.152	0.13	0.14	0.1	0.29	0.69	0.63	0.11	0.16	0.02	0.04
CG12991	1017480282	94	socs36e	Dict	0.7604		*		0.74	0.08	0.47	0.09	0.11	0.886	0.717	0.854	0.333	0.88	0.654	0.898	0.808	0.901	0.891	0.4292	0.347692	0.88	0.152	0.846	0.152	0.872	0.152	0.895	0.152	0.911	0.152	0.19	0.17	0.15	0.33	0.64	0.63	0.43	0.39	0.26	0.24
CG12991	1017480282	94	sog	Dict	0.6657		*		0.53	0.17	0.36	0.18	0.04	0.794	0.601	0.737	0.279	0.78	0.545	0.816	0.693	0.827	0.806	0.8503	0.347692	0.793	0.152	0.735	0.152	0.778	0.152	0.817	0.152	0.858	0.152	0.13	0.17	0.18	0.03	0.7	0.73	0.04	0.09	0.43	0.41
CG12991	1017480282	94	tango14	Dict	0.5665				0.87	0.17	0.08	0.09	0.3	0.899	0.736	0.871	0.356	0.894	0.669	0.914	0.821	0.916	0.86	1.4426	0.347692	0.909	0.152	0.875	0.152	0.902	0.152	0.923	0.152	0.932	0.152	0.16	0.13	0.48	0.67	0.77	0.62	0.08	0.02	0.09	0.05
CG13073	3116200658	524	brk	Dict	0.5732				0.23	0.77	0.25	0.5	0.11	0.919	0.718	0.886	0.323	0.914	0.651	0.937	0.802	0.946	0.885	2.1159	0.632601	0.925	0.152	0.883	0.152	0.916	0.152	0.939	0.152	0.957	0.152	0.69	0.71	0.37	0.36	0.24	0.17	0.03	0.08	0.36	0.33
CG13073	3116200658	524	btd	Dict	0.7716		*		0.83	0.17	0.22	0.01	0.09	0.891	0.703	0.854	0.334	0.882	0.638	0.904	0.803	0.91	0.863	0.5246	0.632601	0.889	0.152	0.851	0.152	0.882	0.152	0.899	0.152	0.921	0.152	0.06	0.02	0.53	0.66	0.51	0.36	0.14	0.16	0.45	0.44
CG13073	3116200658	524	bx	Dict	0.5102				0.2	0.83	0.2	0.29	0.05	0.899	0.714	0.867	0.309	0.895	0.651	0.907	0.792	0.914	0.858	1.1999	0.632601	0.901	0.152	0.863	0.152	0.894	0.152	0.918	0.152	0.934	0.152	0.79	0.8	0.29	0.26	0.25	0.22	0.02	0.06	0.34	0.32
CG13073	3116200658	524	caup	Dict	0.5252		*		0.39	0.27	0.36	0.28	0.08	0.739	0.514	0.677	0.216	0.722	0.459	0.77	0.596	0.771	0.643	0.3834	0.632601	0.746	0.152	0.685	0.152	0.729	0.152	0.769	0.152	0.794	0.152	0.08	0.11	0.36	0.43	0.31	0.18	0.42	0.43	0.06	0.06
CG13073	3116200658	524	cg14147	Dict	0.5136				0.55	0.18	0.24	0.12	0.04	0.733	0.54	0.685	0.256	0.721	0.496	0.752	0.618	0.76	0.693	0.3374	0.632601	0.737	0.152	0.68	0.152	0.721	0.152	0.759	0.152	0.801	0.152	0.38	0.37	0.21	0.34	0.32	0.21	0.4	0.39	0.38	0.38
CG13073	3116200658	524	cg4267	Dict	0.6301		*		0.34	0.23	0.51	0.34	0.33	0.814	0.59	0.77	0.242	0.807	0.53	0.854	0.675	0.854	0.806	0.4521	0.632601	0.81	0.152	0.754	0.152	0.798	0.152	0.83	0.152	0.853	0.152	0.19	0.23	0.4	0.37	0.06	0.15	0.31	0.28	0.66	0.66
CG13073	3116200658	524	chn	Dict	0.5846				0.57	0.17	0.13	0.45	0.34	0.826	0.601	0.773	0.271	0.817	0.544	0.858	0.702	0.881	0.766	0.9439	0.632601	0.824	0.152	0.768	0.152	0.81	0.152	0.847	0.152	0.865	0.152	0.02	0.02	0.44	0.53	0.4	0.27	0.03	0.06	0.35	0.31
CG13073	3116200658	524	ct	Muta	0.5514		*		0.54	0.02	0.38	0.03	0.09	0.705	0.538	0.664	0.253	0.701	0.484	0.718	0.607	0.733	0.65	0.0056	0.632601	0.715	0.152	0.672	0.152	0.705	0.152	0.731	0.152	0.766	0.152	0.12	0.08	0.47	0.51	0.18	0.03	0.25	0.22	0.25	0.27
CG13073	3116200658	524	cv2	Dict	0.6021				0.56	0.49	0.08	0.38	0.25	0.87	0.685	0.828	0.295	0.86	0.6	0.893	0.763	0.898	0.844	0.5685	0.632601	0.859	0.152	0.814	0.152	0.85	0.152	0.878	0.152	0.914	0.152	0.31	0.35	0.38	0.43	0.3	0.25	0.13	0.11	0.62	0.59
CG13073	3116200658	524	cyce	Dict	0.6182				0.06	0.47	0.74	0.25	0.09	0.906	0.718	0.874	0.309	0.899	0.652	0.925	0.798	0.928	0.888	0.9349	0.632601	0.901	0.152	0.857	0.152	0.891	0.152	0.92	0.152	0.936	0.152	0.46	0.5	0.47	0.39	0.06	0.21	0.54	0.55	0.2	0.19
CG13073	3116200658	524	dally	Dict	0.8239		**		0.64	0.29	0.47	0.31	0.12	0.906	0.705	0.866	0.306	0.895	0.649	0.919	0.783	0.941	0.845	0.8955	0.632601	0.912	0.152	0.867	0.152	0.901	0.152	0.928	0.152	0.935	0.152	0.18	0.23	0.62	0.64	0.21	0.06	0.18	0.18	0.57	0.56
CG13073	3116200658	524	dpp	Dict	0.6509				0.44	0.75	0.19	0.01	0.02	0.891	0.7	0.852	0.316	0.883	0.644	0.907	0.794	0.913	0.856	0.4649	0.632601	0.891	0.152	0.853	0.152	0.884	0.152	0.902	0.152	0.92	0.152	0.58	0.59	0.35	0.4	0.49	0.42	0.15	0.2	0.22	0.21
CG13073	3116200658	524	egfr	Dict	0.5648				0.7	0.16	0.09	0.25	0.03	0.856	0.625	0.805	0.283	0.849	0.568	0.871	0.727	0.881	0.797	0.9394	0.632601	0.846	0.152	0.794	0.152	0.834	0.152	0.864	0.152	0.892	0.152	0.11	0.12	0.18	0.37	0.69	0.62	0.11	0.15	0.33	0.32
CG13073	3116200658	524	emc	Dict	0.6504		*		0.54	0.06	0.44	0.37	0.03	0.797	0.601	0.752	0.255	0.791	0.535	0.833	0.683	0.848	0.776	0.3552	0.632601	0.815	0.152	0.761	0.152	0.801	0.152	0.836	0.152	0.867	0.152	0.15	0.08	0.65	0.67	0.07	0.11	0.07	0.06	0.31	0.3
CG13073	3116200658	524	foxo	Dict	0.6486		**		0.34	0.29	0.45	0.29	0	0.752	0.553	0.703	0.242	0.741	0.489	0.775	0.636	0.778	0.742	0.2659	0.632601	0.751	0.152	0.698	0.152	0.739	0.152	0.775	0.152	0.79	0.152	0.2	0.25	0.53	0.51	0.07	0.07	0.17	0.18	0.3	0.28
CG13073	3116200658	524	mad	Dict	0.574				0.84	0.08	0.2	0.2	0.07	0.894	0.724	0.866	0.359	0.887	0.661	0.91	0.811	0.922	0.847	0.5446	0.632601	0.889	0.152	0.854	0.152	0.881	0.152	0.901	0.152	0.907	0.152	0.2	0.16	0.38	0.54	0.57	0.49	0.28	0.25	0.5	0.46
CG13073	3116200658	524	poc1	Dict	0.5268				0.34	0.49	0.08	0.28	0.08	0.801	0.576	0.742	0.257	0.791	0.523	0.832	0.664	0.843	0.724	0.4028	0.632601	0.795	0.152	0.734	0.152	0.78	0.152	0.824	0.152	0.87	0.152	0.31	0.29	0.02	0.07	0.38	0.38	0.25	0.29	0.69	0.68
CG13073	3116200658	524	rho	Dict	0.6903		*		0.42	0.64	0.27	0.24	0.06	0.883	0.676	0.842	0.302	0.873	0.632	0.896	0.784	0.901	0.867	0.6139	0.632601	0.882	0.152	0.835	0.152	0.87	0.152	0.895	0.152	0.913	0.152	0.45	0.44	0.28	0.37	0.56	0.47	0.39	0.44	0.18	0.17
CG13073	3116200658	524	sav	Dict	0.5432				0.34	0.81	0.01	0.18	0.13	0.914	0.732	0.873	0.328	0.904	0.656	0.928	0.795	0.931	0.931	0.5947	0.632601	0.909	0.152	0.868	0.152	0.902	0.152	0.929	0.152	0.952	0.152	0.58	0.56	0.05	0.15	0.59	0.59	0.16	0.23	0.3	0.28
CG13073	3116200658	524	sgg	Dict	0.6191				0.51	0.37	0.25	0.17	0.44	0.862	0.625	0.799	0.263	0.848	0.576	0.881	0.727	0.9	0.823	1.7731	0.632601	0.841	0.152	0.783	0.152	0.828	0.152	0.862	0.152	0.907	0.152	0.21	0.23	0.29	0.34	0.24	0.18	0.23	0.22	0.74	0.74
CG13073	3116200658	524	sls	Dict	0.6472				0.72	0.33	0.05	0.14	0.22	0.84	0.68	0.801	0.314	0.832	0.622	0.857	0.744	0.874	0.801	0.5182	0.632601	0.839	0.152	0.799	0.152	0.832	0.152	0.859	0.152	0.883	0.152	0.03	0.07	0.46	0.61	0.64	0.52	0.12	0.06	0.21	0.16
CG13073	3116200658	524	spi	Dict	0.5746				0.23	0.37	0.57	0.11	0.37	0.827	0.601	0.778	0.242	0.821	0.54	0.837	0.698	0.84	0.809	0.4719	0.632601	0.83	0.152	0.779	0.152	0.818	0.152	0.856	0.152	0.893	0.152	0.4	0.43	0.43	0.36	0.07	0.16	0.33	0.31	0.43	0.45
CG13073	3116200658	524	tai	Dict	0.8792		**		0.71	0.17	0.56	0.09	0.01	0.894	0.73	0.862	0.338	0.889	0.654	0.907	0.805	0.908	0.848	0.4654	0.632601	0.899	0.152	0.868	0.152	0.893	0.152	0.908	0.152	0.921	0.152	0	0.07	0.78	0.84	0.33	0.1	0.31	0.32	0.15	0.14
CG13073	3116200658	524	tango14	Dict	0.6627				0.87	0.17	0.08	0.09	0.3	0.899	0.736	0.871	0.356	0.894	0.669	0.914	0.821	0.916	0.86	1.4426	0.632601	0.909	0.152	0.875	0.152	0.902	0.152	0.923	0.152	0.932	0.152	0.16	0.13	0.48	0.67	0.77	0.62	0.08	0.02	0.09	0.05
CG13073	3116200658	524	trh	Dict	0.5471		*		0.53	0.15	0.11	0.12	0.43	0.775	0.527	0.711	0.231	0.758	0.467	0.81	0.62	0.815	0.708	0.8179	0.632601	0.778	0.152	0.714	0.152	0.764	0.152	0.808	0.152	0.854	0.152	0.09	0.08	0.37	0.52	0.61	0.45	0.21	0.27	0.06	0.09
CG13186	2207967962	339	ap	Dict	0.5391				0.13	0.81	0.11	0.15	0.22	0.856	0.666	0.815	0.299	0.847	0.607	0.87	0.745	0.871	0.826	0.394	0.42554	0.86	0.152	0.82	0.152	0.852	0.152	0.875	0.152	0.892	0.152	0.74	0.76	0.27	0.23	0.17	0.16	0.1	0.06	0.21	0.18
CG13186	2207967962	339	bun	Dict	0.6466				0.18	0.78	0.06	0.17	0.19	0.885	0.664	0.841	0.31	0.875	0.609	0.91	0.742	0.935	0.885	0.7822	0.42554	0.887	0.152	0.834	0.152	0.874	0.152	0.905	0.152	0.925	0.152	0.54	0.52	0.04	0.14	0.61	0.58	0.13	0.22	0.05	0.09
CG13186	2207967962	339	bx	Dict	0.5042				0.2	0.83	0.2	0.29	0.05	0.899	0.714	0.867	0.309	0.895	0.651	0.907	0.792	0.914	0.858	1.1999	0.42554	0.901	0.152	0.863	0.152	0.894	0.152	0.918	0.152	0.934	0.152	0.79	0.8	0.29	0.26	0.25	0.22	0.02	0.06	0.34	0.32
CG13186	2207967962	339	cv2	Dict	0.5014				0.56	0.49	0.08	0.38	0.25	0.87	0.685	0.828	0.295	0.86	0.6	0.893	0.763	0.898	0.844	0.5685	0.42554	0.859	0.152	0.814	0.152	0.85	0.152	0.878	0.152	0.914	0.152	0.31	0.35	0.38	0.43	0.3	0.25	0.13	0.11	0.62	0.59
CG13186	2207967962	339	dad	Dict	0.5904				0.6	0.35	0.36	0.11	0.33	0.869	0.651	0.825	0.301	0.858	0.591	0.884	0.743	0.901	0.864	0.3276	0.42554	0.857	0.152	0.812	0.152	0.849	0.152	0.877	0.152	0.897	0.152	0.02	0.03	0.18	0.36	0.74	0.69	0.29	0.21	0.1	0.04
CG13186	2207967962	339	dll	Dict	0.6066				0.22	0.84	0.07	0.09	0.13	0.893	0.691	0.855	0.319	0.882	0.626	0.902	0.775	0.916	0.881	0.8412	0.42554	0.894	0.152	0.854	0.152	0.885	0.152	0.911	0.152	0.924	0.152	0.68	0.66	0.07	0.15	0.59	0.59	0.03	0.11	0.06	0.04
CG13186	2207967962	339	dlp	Dict	0.6369		*		0.22	0.56	0.21	0.39	0.18	0.845	0.586	0.784	0.258	0.829	0.528	0.86	0.691	0.881	0.769	0.9958	0.42554	0.815	0.152	0.755	0.152	0.8	0.152	0.84	0.152	0.86	0.152	0.56	0.54	0.26	0.3	0.02	0.14	0.16	0.13	0.33	0.32
CG13186	2207967962	339	kay	Dict	0.6454		*		0.28	0.64	0.08	0.07	0.3	0.825	0.609	0.772	0.243	0.814	0.538	0.851	0.678	0.862	0.785	0.4534	0.42554	0.821	0.152	0.767	0.152	0.806	0.152	0.839	0.152	0.857	0.152	0.47	0.49	0.19	0.23	0.32	0.32	0.18	0.13	0.28	0.24
CG13186	2207967962	339	lea	Dict	0.5301		*		0.06	0.56	0.09	0.04	0.24	0.714	0.505	0.665	0.233	0.706	0.452	0.734	0.592	0.736	0.647	0.2912	0.42554	0.723	0.152	0.659	0.152	0.704	0.152	0.756	0.152	0.813	0.152	0.53	0.51	0.06	0.06	0.18	0.24	0.1	0.06	0.28	0.28
CG13186	2207967962	339	luna	Dict	0.6841		*		0.18	0.75	0.2	0.38	0.08	0.869	0.647	0.82	0.292	0.86	0.599	0.88	0.733	0.882	0.805	0.3695	0.42554	0.861	0.152	0.819	0.152	0.852	0.152	0.879	0.152	0.903	0.152	0.62	0.62	0.08	0.12	0.38	0.41	0.28	0.2	0.3	0.25
CG13186	2207967962	339	med	Dict	0.5716				0.17	0.63	0.24	0.37	0.19	0.855	0.625	0.8	0.281	0.843	0.558	0.875	0.718	0.896	0.847	0.768	0.42554	0.84	0.152	0.789	0.152	0.828	0.152	0.862	0.152	0.893	0.152	0.54	0.51	0.21	0.19	0.24	0.32	0.14	0.06	0.15	0.1
CG13186	2207967962	339	os	Dict	0.6051		*		0.36	0.12	0.65	0.28	0	0.816	0.603	0.775	0.255	0.808	0.547	0.844	0.699	0.858	0.789	0.2858	0.42554	0.823	0.152	0.777	0.152	0.814	0.152	0.838	0.152	0.855	0.152	0.09	0.09	0.09	0.04	0.44	0.5	0.58	0.54	0.23	0.18
CG13186	2207967962	339	pnt	Dict	0.6238				0.28	0.69	0.03	0.39	0.09	0.858	0.653	0.816	0.281	0.853	0.584	0.873	0.772	0.886	0.829	0.9325	0.42554	0.843	0.152	0.802	0.152	0.836	0.152	0.865	0.152	0.891	0.152	0.52	0.53	0.21	0.26	0.4	0.37	0.11	0.04	0.34	0.29
CG13186	2207967962	339	rpt1	Dict	0.6793		**		0.04	0.25	0.66	0.15	0.07	0.793	0.555	0.721	0.245	0.77	0.503	0.816	0.623	0.817	0.725	0.264	0.42554	0.775	0.152	0.72	0.152	0.763	0.152	0.791	0.152	0.839	0.152	0.12	0.08	0.45	0.35	0.32	0.47	0.36	0.32	0.25	0.23
CG13186	2207967962	339	sav	Dict	0.6376				0.34	0.81	0.01	0.18	0.13	0.914	0.732	0.873	0.328	0.904	0.656	0.928	0.795	0.931	0.931	0.5947	0.42554	0.909	0.152	0.868	0.152	0.902	0.152	0.929	0.152	0.952	0.152	0.58	0.56	0.05	0.15	0.59	0.59	0.16	0.23	0.3	0.28
CG13186	2207967962	339	sd	Dict	0.5746				0.34	0.63	0.37	0.24	0.02	0.856	0.667	0.823	0.286	0.851	0.597	0.87	0.767	0.871	0.849	5.3633	0.42554	0.87	0.152	0.824	0.152	0.861	0.152	0.885	0.152	0.905	0.152	0.7	0.64	0.42	0.45	0.08	0.25	0.3	0.25	0.11	0.09
CG13186	2207967962	339	ser	Dict	0.7367		*		0.11	0.78	0.3	0.27	0.16	0.893	0.688	0.842	0.31	0.879	0.621	0.905	0.793	0.918	0.869	0.4217	0.42554	0.876	0.152	0.833	0.152	0.868	0.152	0.891	0.152	0.919	0.152	0.69	0.66	0.2	0.16	0.36	0.45	0.2	0.11	0.1	0.06
CG13186	2207967962	339	shn	Dict	0.5259				0.07	0.42	0.09	0.6	0.08	0.789	0.552	0.733	0.222	0.78	0.475	0.812	0.651	0.824	0.737	0.7674	0.42554	0.779	0.152	0.71	0.152	0.762	0.152	0.81	0.152	0.865	0.152	0.35	0.37	0.05	0.03	0.05	0.08	0.21	0.19	0.46	0.41
CG13186	2207967962	339	ubx	Dict	0.5783				0.45	0.7	0.38	0.06	0.15	0.916	0.737	0.881	0.325	0.908	0.669	0.924	0.823	0.952	0.891	0.6049	0.42554	0.91	0.152	0.876	0.152	0.902	0.152	0.929	0.152	0.943	0.152	0.74	0.7	0.38	0.42	0.12	0.27	0.29	0.22	0.23	0.25
CG13251	3120631321	726	ap	Dict	0.7436		*		0.13	0.81	0.11	0.15	0.22	0.856	0.666	0.815	0.299	0.847	0.607	0.87	0.745	0.871	0.826	0.394	0.175547	0.86	0.152	0.82	0.152	0.852	0.152	0.875	0.152	0.892	0.152	0.74	0.76	0.27	0.23	0.17	0.16	0.1	0.06	0.21	0.18
CG13251	3120631321	726	brk	Dict	0.7563		*		0.23	0.77	0.25	0.5	0.11	0.919	0.718	0.886	0.323	0.914	0.651	0.937	0.802	0.946	0.885	2.1159	0.175547	0.925	0.152	0.883	0.152	0.916	0.152	0.939	0.152	0.957	0.152	0.69	0.71	0.37	0.36	0.24	0.17	0.03	0.08	0.36	0.33
CG13251	3120631321	726	bun	Dict	0.7701		**		0.18	0.78	0.06	0.17	0.19	0.885	0.664	0.841	0.31	0.875	0.609	0.91	0.742	0.935	0.885	0.7822	0.175547	0.887	0.152	0.834	0.152	0.874	0.152	0.905	0.152	0.925	0.152	0.54	0.52	0.04	0.14	0.61	0.58	0.13	0.22	0.05	0.09
CG13251	3120631321	726	bx	Dict	0.7348		*		0.2	0.83	0.2	0.29	0.05	0.899	0.714	0.867	0.309	0.895	0.651	0.907	0.792	0.914	0.858	1.1999	0.175547	0.901	0.152	0.863	0.152	0.894	0.152	0.918	0.152	0.934	0.152	0.79	0.8	0.29	0.26	0.25	0.22	0.02	0.06	0.34	0.32
CG13251	3120631321	726	cv2	Dict	0.5474				0.56	0.49	0.08	0.38	0.25	0.87	0.685	0.828	0.295	0.86	0.6	0.893	0.763	0.898	0.844	0.5685	0.175547	0.859	0.152	0.814	0.152	0.85	0.152	0.878	0.152	0.914	0.152	0.31	0.35	0.38	0.43	0.3	0.25	0.13	0.11	0.62	0.59
CG13251	3120631321	726	dll	Dict	0.7742		*		0.22	0.84	0.07	0.09	0.13	0.893	0.691	0.855	0.319	0.882	0.626	0.902	0.775	0.916	0.881	0.8412	0.175547	0.894	0.152	0.854	0.152	0.885	0.152	0.911	0.152	0.924	0.152	0.68	0.66	0.07	0.15	0.59	0.59	0.03	0.11	0.06	0.04
CG13251	3120631321	726	dlp	Dict	0.5213				0.22	0.56	0.21	0.39	0.18	0.845	0.586	0.784	0.258	0.829	0.528	0.86	0.691	0.881	0.769	0.9958	0.175547	0.815	0.152	0.755	0.152	0.8	0.152	0.84	0.152	0.86	0.152	0.56	0.54	0.26	0.3	0.02	0.14	0.16	0.13	0.33	0.32
CG13251	3120631321	726	dpp	Dict	0.6758				0.44	0.75	0.19	0.01	0.02	0.891	0.7	0.852	0.316	0.883	0.644	0.907	0.794	0.913	0.856	0.4649	0.175547	0.891	0.152	0.853	0.152	0.884	0.152	0.902	0.152	0.92	0.152	0.58	0.59	0.35	0.4	0.49	0.42	0.15	0.2	0.22	0.21
CG13251	3120631321	726	ds	Dict	0.6623				0.39	0.84	0.12	0.23	0.09	0.937	0.759	0.903	0.356	0.929	0.684	0.943	0.852	0.947	0.903	5.7655	0.175547	0.932	0.152	0.898	0.152	0.925	0.152	0.944	0.152	0.956	0.152	0.89	0.85	0.21	0.26	0.14	0.21	0.26	0.31	0.22	0.21
CG13251	3120631321	726	ex	Dict	0.6647				0.04	0.82	0.43	0.12	0.04	0.914	0.73	0.883	0.322	0.91	0.661	0.92	0.832	0.947	0.875	5.4462	0.175547	0.918	0.152	0.88	0.152	0.909	0.152	0.929	0.152	0.944	0.152	0.82	0.81	0.21	0.17	0.21	0.15	0.42	0.47	0.01	0.01
CG13251	3120631321	726	ft	Dict	0.5618				0.39	0.75	0.08	0.35	0.1	0.927	0.72	0.889	0.323	0.919	0.649	0.933	0.808	0.941	0.888	4.3023	0.175547	0.916	0.152	0.877	0.152	0.907	0.152	0.938	0.152	0.95	0.152	0.77	0.7	0.42	0.43	0.25	0.36	0.22	0.28	0.21	0.2
CG13251	3120631321	726	fz	Dict	0.5371				0.06	0.7	0.17	0.26	0.24	0.85	0.643	0.804	0.281	0.839	0.574	0.861	0.74	0.866	0.798	0.4509	0.175547	0.841	0.152	0.79	0.152	0.826	0.152	0.861	0.152	0.882	0.152	0.77	0.78	0.15	0.08	0.06	0.08	0.02	0.03	0.39	0.4
CG13251	3120631321	726	inr	Dict	0.5201				0.32	0.49	0.12	0.08	0.29	0.794	0.561	0.744	0.24	0.782	0.496	0.807	0.653	0.838	0.701	0.5695	0.175547	0.795	0.152	0.731	0.152	0.778	0.152	0.824	0.152	0.855	0.152	0.33	0.36	0.37	0.42	0.41	0.3	0.06	0.11	0.09	0.12
CG13251	3120631321	726	kay	Dict	0.7274		**		0.28	0.64	0.08	0.07	0.3	0.825	0.609	0.772	0.243	0.814	0.538	0.851	0.678	0.862	0.785	0.4534	0.175547	0.821	0.152	0.767	0.152	0.806	0.152	0.839	0.152	0.857	0.152	0.47	0.49	0.19	0.23	0.32	0.32	0.18	0.13	0.28	0.24
CG13251	3120631321	726	luna	Dict	0.7636		**		0.18	0.75	0.2	0.38	0.08	0.869	0.647	0.82	0.292	0.86	0.599	0.88	0.733	0.882	0.805	0.3695	0.175547	0.861	0.152	0.819	0.152	0.852	0.152	0.879	0.152	0.903	0.152	0.62	0.62	0.08	0.12	0.38	0.41	0.28	0.2	0.3	0.25
CG13251	3120631321	726	med	Dict	0.7243		**		0.17	0.63	0.24	0.37	0.19	0.855	0.625	0.8	0.281	0.843	0.558	0.875	0.718	0.896	0.847	0.768	0.175547	0.84	0.152	0.789	0.152	0.828	0.152	0.862	0.152	0.893	0.152	0.54	0.51	0.21	0.19	0.24	0.32	0.14	0.06	0.15	0.1
CG13251	3120631321	726	mpk2	Dict	0.6375		*		0.18	0.68	0.09	0.37	0.15	0.846	0.633	0.806	0.278	0.839	0.57	0.862	0.742	0.889	0.829	0.4463	0.175547	0.849	0.152	0.797	0.152	0.837	0.152	0.878	0.152	0.903	0.152	0.61	0.59	0.05	0.06	0.23	0.26	0.05	0.09	0.59	0.58
CG13251	3120631321	726	nmo	Dict	0.6998				0.31	0.81	0.35	0.29	0.15	0.94	0.734	0.907	0.346	0.934	0.656	0.96	0.831	0.961	0.909	2.0873	0.175547	0.938	0.152	0.902	0.152	0.931	0.152	0.953	0.152	0.963	0.152	0.92	0.92	0.07	0.06	0.16	0.13	0.17	0.2	0.2	0.2
CG13251	3120631321	726	pnt	Dict	0.7274		*		0.28	0.69	0.03	0.39	0.09	0.858	0.653	0.816	0.281	0.853	0.584	0.873	0.772	0.886	0.829	0.9325	0.175547	0.843	0.152	0.802	0.152	0.836	0.152	0.865	0.152	0.891	0.152	0.52	0.53	0.21	0.26	0.4	0.37	0.11	0.04	0.34	0.29
CG13251	3120631321	726	rho	Dict	0.5073				0.42	0.64	0.27	0.24	0.06	0.883	0.676	0.842	0.302	0.873	0.632	0.896	0.784	0.901	0.867	0.6139	0.175547	0.882	0.152	0.835	0.152	0.87	0.152	0.895	0.152	0.913	0.152	0.45	0.44	0.28	0.37	0.56	0.47	0.39	0.44	0.18	0.17
CG13251	3120631321	726	sav	Dict	0.7466		*		0.34	0.81	0.01	0.18	0.13	0.914	0.732	0.873	0.328	0.904	0.656	0.928	0.795	0.931	0.931	0.5947	0.175547	0.909	0.152	0.868	0.152	0.902	0.152	0.929	0.152	0.952	0.152	0.58	0.56	0.05	0.15	0.59	0.59	0.16	0.23	0.3	0.28
CG13251	3120631321	726	sd	Dict	0.6061				0.34	0.63	0.37	0.24	0.02	0.856	0.667	0.823	0.286	0.851	0.597	0.87	0.767	0.871	0.849	5.3633	0.175547	0.87	0.152	0.824	0.152	0.861	0.152	0.885	0.152	0.905	0.152	0.7	0.64	0.42	0.45	0.08	0.25	0.3	0.25	0.11	0.09
CG13251	3120631321	726	ser	Dict	0.8176		**		0.11	0.78	0.3	0.27	0.16	0.893	0.688	0.842	0.31	0.879	0.621	0.905	0.793	0.918	0.869	0.4217	0.175547	0.876	0.152	0.833	0.152	0.868	0.152	0.891	0.152	0.919	0.152	0.69	0.66	0.2	0.16	0.36	0.45	0.2	0.11	0.1	0.06
CG13251	3120631321	726	shn	Dict	0.511				0.07	0.42	0.09	0.6	0.08	0.789	0.552	0.733	0.222	0.78	0.475	0.812	0.651	0.824	0.737	0.7674	0.175547	0.779	0.152	0.71	0.152	0.762	0.152	0.81	0.152	0.865	0.152	0.35	0.37	0.05	0.03	0.05	0.08	0.21	0.19	0.46	0.41
CG13251	3120631321	726	tx	Dict	0.5829				0.06	0.74	0.53	0.01	0.18	0.914	0.73	0.868	0.33	0.9	0.655	0.928	0.801	0.928	0.839	0.9684	0.175547	0.903	0.152	0.866	0.152	0.895	0.152	0.917	0.152	0.929	0.152	0.74	0.75	0.23	0.15	0.01	0.04	0.43	0.45	0.19	0.2
CG13251	3120631321	726	ubx	Dict	0.5895				0.45	0.7	0.38	0.06	0.15	0.916	0.737	0.881	0.325	0.908	0.669	0.924	0.823	0.952	0.891	0.6049	0.175547	0.91	0.152	0.876	0.152	0.902	0.152	0.929	0.152	0.943	0.152	0.74	0.7	0.38	0.42	0.12	0.27	0.29	0.22	0.23	0.25
CG13251	3120631321	726	wg	Dict	0.6222		*		0.35	0.58	0.01	0.12	0.19	0.778	0.575	0.724	0.25	0.762	0.522	0.796	0.661	0.804	0.737	1.6659	0.175547	0.776	0.152	0.726	0.152	0.764	0.152	0.798	0.152	0.846	0.152	0.62	0.59	0.24	0.31	0.06	0.04	0.13	0.15	0.18	0.17
CG13251	3120631321	726	wts	Dict	0.5744				0.36	0.69	0.38	0.08	0.22	0.894	0.718	0.857	0.324	0.886	0.645	0.917	0.809	0.926	0.882	0.9344	0.175547	0.887	0.152	0.845	0.152	0.877	0.152	0.901	0.152	0.918	0.152	0.79	0.77	0.09	0.2	0.16	0.12	0.41	0.42	0.22	0.24
CG13295	3106067730	555	ap	Dict	0.525				0.13	0.81	0.11	0.15	0.22	0.856	0.666	0.815	0.299	0.847	0.607	0.87	0.745	0.871	0.826	0.394	0.0720266	0.86	0.152	0.82	0.152	0.852	0.152	0.875	0.152	0.892	0.152	0.74	0.76	0.27	0.23	0.17	0.16	0.1	0.06	0.21	0.18
CG13295	3106067730	555	bx	Dict	0.566				0.2	0.83	0.2	0.29	0.05	0.899	0.714	0.867	0.309	0.895	0.651	0.907	0.792	0.914	0.858	1.1999	0.0720266	0.901	0.152	0.863	0.152	0.894	0.152	0.918	0.152	0.934	0.152	0.79	0.8	0.29	0.26	0.25	0.22	0.02	0.06	0.34	0.32
CG13295	3106067730	555	cg4267	Dict	0.5749				0.34	0.23	0.51	0.34	0.33	0.814	0.59	0.77	0.242	0.807	0.53	0.854	0.675	0.854	0.806	0.4521	0.0720266	0.81	0.152	0.754	0.152	0.798	0.152	0.83	0.152	0.853	0.152	0.19	0.23	0.4	0.37	0.06	0.15	0.31	0.28	0.66	0.66
CG13295	3106067730	555	cyce	Dict	0.6124				0.06	0.47	0.74	0.25	0.09	0.906	0.718	0.874	0.309	0.899	0.652	0.925	0.798	0.928	0.888	0.9349	0.0720266	0.901	0.152	0.857	0.152	0.891	0.152	0.92	0.152	0.936	0.152	0.46	0.5	0.47	0.39	0.06	0.21	0.54	0.55	0.2	0.19
CG13295	3106067730	555	ds	Dict	0.5129				0.39	0.84	0.12	0.23	0.09	0.937	0.759	0.903	0.356	0.929	0.684	0.943	0.852	0.947	0.903	5.7655	0.0720266	0.932	0.152	0.898	0.152	0.925	0.152	0.944	0.152	0.956	0.152	0.89	0.85	0.21	0.26	0.14	0.21	0.26	0.31	0.22	0.21
CG13295	3106067730	555	dsh	Dict	0.5126				0.68	0.51	0.24	0.14	0.1	0.91	0.72	0.873	0.33	0.9	0.649	0.92	0.793	0.934	0.84	1.1394	0.0720266	0.91	0.152	0.871	0.152	0.9	0.152	0.923	0.152	0.937	0.152	0.68	0.66	0.19	0.35	0.33	0.27	0.26	0.26	0.32	0.3
CG13295	3106067730	555	ex	Dict	0.5283				0.04	0.82	0.43	0.12	0.04	0.914	0.73	0.883	0.322	0.91	0.661	0.92	0.832	0.947	0.875	5.4462	0.0720266	0.918	0.152	0.88	0.152	0.909	0.152	0.929	0.152	0.944	0.152	0.82	0.81	0.21	0.17	0.21	0.15	0.42	0.47	0.01	0.01
CG13295	3106067730	555	fz	Dict	0.5721				0.06	0.7	0.17	0.26	0.24	0.85	0.643	0.804	0.281	0.839	0.574	0.861	0.74	0.866	0.798	0.4509	0.0720266	0.841	0.152	0.79	0.152	0.826	0.152	0.861	0.152	0.882	0.152	0.77	0.78	0.15	0.08	0.06	0.08	0.02	0.03	0.39	0.4
CG13295	3106067730	555	inv	Dict	0.516				0.21	0.21	0.49	0.43	0.37	0.794	0.541	0.743	0.234	0.786	0.48	0.811	0.656	0.863	0.766	0.3255	0.0720266	0.798	0.152	0.739	0.152	0.786	0.152	0.826	0.152	0.867	0.152	0.3	0.27	0.03	0.1	0.19	0.2	0.61	0.57	0.04	0.1
CG13295	3106067730	555	nmo	Dict	0.7399		*		0.31	0.81	0.35	0.29	0.15	0.94	0.734	0.907	0.346	0.934	0.656	0.96	0.831	0.961	0.909	2.0873	0.0720266	0.938	0.152	0.902	0.152	0.931	0.152	0.953	0.152	0.963	0.152	0.92	0.92	0.07	0.06	0.16	0.13	0.17	0.2	0.2	0.2
CG13295	3106067730	555	ptc	Dict	0.5231				0.6	0.19	0.19	0.05	0.47	0.847	0.608	0.783	0.28	0.832	0.556	0.855	0.7	0.862	0.784	1.9546	0.0720266	0.831	0.152	0.769	0.152	0.813	0.152	0.863	0.152	0.884	0.152	0.46	0.46	0.19	0.39	0.58	0.48	0.06	0.01	0.05	0.01
CG13295	3106067730	555	spi	Dict	0.6852		*		0.23	0.37	0.57	0.11	0.37	0.827	0.601	0.778	0.242	0.821	0.54	0.837	0.698	0.84	0.809	0.4719	0.0720266	0.83	0.152	0.779	0.152	0.818	0.152	0.856	0.152	0.893	0.152	0.4	0.43	0.43	0.36	0.07	0.16	0.33	0.31	0.43	0.45
CG13295	3106067730	555	tx	Dict	0.7172				0.06	0.74	0.53	0.01	0.18	0.914	0.73	0.868	0.33	0.9	0.655	0.928	0.801	0.928	0.839	0.9684	0.0720266	0.903	0.152	0.866	0.152	0.895	0.152	0.917	0.152	0.929	0.152	0.74	0.75	0.23	0.15	0.01	0.04	0.43	0.45	0.19	0.2
CG13295	3106067730	555	wts	Dict	0.6992				0.36	0.69	0.38	0.08	0.22	0.894	0.718	0.857	0.324	0.886	0.645	0.917	0.809	0.926	0.882	0.9344	0.0720266	0.887	0.152	0.845	0.152	0.877	0.152	0.901	0.152	0.918	0.152	0.79	0.77	0.09	0.2	0.16	0.12	0.41	0.42	0.22	0.24
CG13300	3106367563	559	btd	Dict	0.6262				0.83	0.17	0.22	0.01	0.09	0.891	0.703	0.854	0.334	0.882	0.638	0.904	0.803	0.91	0.863	0.5246	0.137391	0.889	0.152	0.851	0.152	0.882	0.152	0.899	0.152	0.921	0.152	0.06	0.02	0.53	0.66	0.51	0.36	0.14	0.16	0.45	0.44
CG13300	3106367563	559	cg14147	Dict	0.5161				0.55	0.18	0.24	0.12	0.04	0.733	0.54	0.685	0.256	0.721	0.496	0.752	0.618	0.76	0.693	0.3374	0.137391	0.737	0.152	0.68	0.152	0.721	0.152	0.759	0.152	0.801	0.152	0.38	0.37	0.21	0.34	0.32	0.21	0.4	0.39	0.38	0.38
CG13300	3106367563	559	cg4267	Dict	0.6761		**		0.34	0.23	0.51	0.34	0.33	0.814	0.59	0.77	0.242	0.807	0.53	0.854	0.675	0.854	0.806	0.4521	0.137391	0.81	0.152	0.754	0.152	0.798	0.152	0.83	0.152	0.853	0.152	0.19	0.23	0.4	0.37	0.06	0.15	0.31	0.28	0.66	0.66
CG13300	3106367563	559	ct	Muta	0.5873		*		0.54	0.02	0.38	0.03	0.09	0.705	0.538	0.664	0.253	0.701	0.484	0.718	0.607	0.733	0.65	0.0056	0.137391	0.715	0.152	0.672	0.152	0.705	0.152	0.731	0.152	0.766	0.152	0.12	0.08	0.47	0.51	0.18	0.03	0.25	0.22	0.25	0.27
CG13300	3106367563	559	d	Dict	0.6298		**		0.16	0.46	0.09	0.05	0.56	0.732	0.49	0.664	0.199	0.718	0.433	0.759	0.581	0.795	0.674	0.2325	0.137391	0.728	0.152	0.67	0.152	0.715	0.152	0.75	0.152	0.79	0.152	0.42	0.39	0.05	0.02	0.29	0.29	0.05	0.03	0.37	0.4
CG13300	3106367563	559	dally	Dict	0.6493				0.64	0.29	0.47	0.31	0.12	0.906	0.705	0.866	0.306	0.895	0.649	0.919	0.783	0.941	0.845	0.8955	0.137391	0.912	0.152	0.867	0.152	0.901	0.152	0.928	0.152	0.935	0.152	0.18	0.23	0.62	0.64	0.21	0.06	0.18	0.18	0.57	0.56
CG13300	3106367563	559	dys	Dict	0.5185		**		0.3	0.15	0	0.26	0.17	0.644	0.408	0.583	0.162	0.634	0.359	0.657	0.488	0.675	0.548	0.3208	0.137391	0.669	0.152	0.593	0.152	0.651	0.152	0.708	0.152	0.744	0.152	0.05	0.04	0.06	0.01	0.21	0.23	0.14	0.14	0.66	0.66
CG13300	3106367563	559	kn	Dict	0.621				0.64	0.28	0.11	0.11	0.28	0.824	0.637	0.777	0.296	0.81	0.565	0.844	0.703	0.867	0.779	0.3931	0.137391	0.815	0.152	0.763	0.152	0.803	0.152	0.833	0.152	0.858	0.152	0.43	0.39	0.35	0.43	0.14	0.05	0.01	0.04	0.51	0.51
CG13300	3106367563	559	porin2	Dict	0.6363		**		0.33	0.08	0.08	0.17	0.4	0.707	0.432	0.629	0.171	0.692	0.385	0.758	0.534	0.768	0.592	0.3654	0.137391	0.705	0.152	0.622	0.152	0.684	0.152	0.734	0.152	0.798	0.152	0.18	0.18	0.05	0.09	0.03	0.03	0.12	0.09	0.4	0.42
CG13300	3106367563	559	s6k	Dict	0.6405		*		0.41	0.16	0.42	0.15	0.43	0.797	0.575	0.75	0.247	0.785	0.514	0.818	0.673	0.836	0.777	0.3905	0.137391	0.79	0.152	0.728	0.152	0.774	0.152	0.814	0.152	0.852	0.152	0.22	0.16	0.48	0.46	0.17	0.29	0.14	0.09	0.47	0.48
CG13300	3106367563	559	sgg	Dict	0.6637		*		0.51	0.37	0.25	0.17	0.44	0.862	0.625	0.799	0.263	0.848	0.576	0.881	0.727	0.9	0.823	1.7731	0.137391	0.841	0.152	0.783	0.152	0.828	0.152	0.862	0.152	0.907	0.152	0.21	0.23	0.29	0.34	0.24	0.18	0.23	0.22	0.74	0.74
CG13300	3106367563	559	spi	Dict	0.6234		*		0.23	0.37	0.57	0.11	0.37	0.827	0.601	0.778	0.242	0.821	0.54	0.837	0.698	0.84	0.809	0.4719	0.137391	0.83	0.152	0.779	0.152	0.818	0.152	0.856	0.152	0.893	0.152	0.4	0.43	0.43	0.36	0.07	0.16	0.33	0.31	0.43	0.45
CG13300	3106367563	559	ubx	Dict	0.5261				0.45	0.7	0.38	0.06	0.15	0.916	0.737	0.881	0.325	0.908	0.669	0.924	0.823	0.952	0.891	0.6049	0.137391	0.91	0.152	0.876	0.152	0.902	0.152	0.929	0.152	0.943	0.152	0.74	0.7	0.38	0.42	0.12	0.27	0.29	0.22	0.23	0.25
CG13426	2216407917	414	btd	Dict	0.8118		**		0.83	0.17	0.22	0.01	0.09	0.891	0.703	0.854	0.334	0.882	0.638	0.904	0.803	0.91	0.863	0.5246	0.44638	0.889	0.152	0.851	0.152	0.882	0.152	0.899	0.152	0.921	0.152	0.06	0.02	0.53	0.66	0.51	0.36	0.14	0.16	0.45	0.44
CG13426	2216407917	414	cg14147	Dict	0.5837		*		0.55	0.18	0.24	0.12	0.04	0.733	0.54	0.685	0.256	0.721	0.496	0.752	0.618	0.76	0.693	0.3374	0.44638	0.737	0.152	0.68	0.152	0.721	0.152	0.759	0.152	0.801	0.152	0.38	0.37	0.21	0.34	0.32	0.21	0.4	0.39	0.38	0.38
CG13426	2216407917	414	cg8654	Dict	0.573				0.63	0.1	0.2	0.08	0.1	0.738	0.574	0.696	0.263	0.73	0.517	0.775	0.637	0.797	0.705	0.4142	0.44638	0.749	0.152	0.7	0.152	0.738	0.152	0.77	0.152	0.818	0.152	0.14	0.12	0.15	0.3	0.49	0.46	0.09	0.08	0.45	0.44
CG13426	2216407917	414	chn	Dict	0.5371				0.57	0.17	0.13	0.45	0.34	0.826	0.601	0.773	0.271	0.817	0.544	0.858	0.702	0.881	0.766	0.9439	0.44638	0.824	0.152	0.768	0.152	0.81	0.152	0.847	0.152	0.865	0.152	0.02	0.02	0.44	0.53	0.4	0.27	0.03	0.06	0.35	0.31
CG13426	2216407917	414	ct	Muta	0.6429		**		0.54	0.02	0.38	0.03	0.09	0.705	0.538	0.664	0.253	0.701	0.484	0.718	0.607	0.733	0.65	0.0056	0.44638	0.715	0.152	0.672	0.152	0.705	0.152	0.731	0.152	0.766	0.152	0.12	0.08	0.47	0.51	0.18	0.03	0.25	0.22	0.25	0.27
CG13426	2216407917	414	dally	Dict	0.6805				0.64	0.29	0.47	0.31	0.12	0.906	0.705	0.866	0.306	0.895	0.649	0.919	0.783	0.941	0.845	0.8955	0.44638	0.912	0.152	0.867	0.152	0.901	0.152	0.928	0.152	0.935	0.152	0.18	0.23	0.62	0.64	0.21	0.06	0.18	0.18	0.57	0.56
CG13426	2216407917	414	dsh	Dict	0.5415				0.68	0.51	0.24	0.14	0.1	0.91	0.72	0.873	0.33	0.9	0.649	0.92	0.793	0.934	0.84	1.1394	0.44638	0.91	0.152	0.871	0.152	0.9	0.152	0.923	0.152	0.937	0.152	0.68	0.66	0.19	0.35	0.33	0.27	0.26	0.26	0.32	0.3
CG13426	2216407917	414	egfr	Dict	0.5327				0.7	0.16	0.09	0.25	0.03	0.856	0.625	0.805	0.283	0.849	0.568	0.871	0.727	0.881	0.797	0.9394	0.44638	0.846	0.152	0.794	0.152	0.834	0.152	0.864	0.152	0.892	0.152	0.11	0.12	0.18	0.37	0.69	0.62	0.11	0.15	0.33	0.32
CG13426	2216407917	414	fj	Dict	0.7108				0.84	0.35	0.16	0.16	0.06	0.938	0.763	0.909	0.355	0.932	0.705	0.952	0.857	0.956	0.929	2.0627	0.44638	0.928	0.152	0.894	0.152	0.921	0.152	0.941	0.152	0.953	0.152	0.59	0.54	0.46	0.61	0.39	0.27	0.29	0.29	0.37	0.34
CG13426	2216407917	414	kn	Dict	0.5307				0.64	0.28	0.11	0.11	0.28	0.824	0.637	0.777	0.296	0.81	0.565	0.844	0.703	0.867	0.779	0.3931	0.44638	0.815	0.152	0.763	0.152	0.803	0.152	0.833	0.152	0.858	0.152	0.43	0.39	0.35	0.43	0.14	0.05	0.01	0.04	0.51	0.51
CG13426	2216407917	414	mad	Dict	0.6055				0.84	0.08	0.2	0.2	0.07	0.894	0.724	0.866	0.359	0.887	0.661	0.91	0.811	0.922	0.847	0.5446	0.44638	0.889	0.152	0.854	0.152	0.881	0.152	0.901	0.152	0.907	0.152	0.2	0.16	0.38	0.54	0.57	0.49	0.28	0.25	0.5	0.46
CG13426	2216407917	414	mats	Dict	0.6099				0.58	0.58	0.2	0.15	0.19	0.892	0.685	0.853	0.318	0.882	0.628	0.899	0.766	0.9	0.866	3.5887	0.44638	0.884	0.152	0.843	0.152	0.875	0.152	0.897	0.152	0.918	0.152	0.72	0.65	0.54	0.62	0.07	0.12	0.01	0.04	0.07	0.04
CG13426	2216407917	414	sd	Muta	0.5179				0.58	0.16	0.17	0.41	0.11	0.76	0.568	0.706	0.264	0.746	0.497	0.791	0.631	0.798	0.704	0.009	0.44638	0.778	0.152	0.726	0.152	0.767	0.152	0.799	0.152	0.844	0.152	0.13	0.14	0.1	0.29	0.69	0.63	0.11	0.16	0.02	0.04
CG13426	2216407917	414	sls	Dict	0.5667				0.72	0.33	0.05	0.14	0.22	0.84	0.68	0.801	0.314	0.832	0.622	0.857	0.744	0.874	0.801	0.5182	0.44638	0.839	0.152	0.799	0.152	0.832	0.152	0.859	0.152	0.883	0.152	0.03	0.07	0.46	0.61	0.64	0.52	0.12	0.06	0.21	0.16
CG13426	2216407917	414	tai	Dict	0.7555		*		0.71	0.17	0.56	0.09	0.01	0.894	0.73	0.862	0.338	0.889	0.654	0.907	0.805	0.908	0.848	0.4654	0.44638	0.899	0.152	0.868	0.152	0.893	0.152	0.908	0.152	0.921	0.152	0	0.07	0.78	0.84	0.33	0.1	0.31	0.32	0.15	0.14
CG13426	2216407917	414	tango14	Dict	0.7101				0.87	0.17	0.08	0.09	0.3	0.899	0.736	0.871	0.356	0.894	0.669	0.914	0.821	0.916	0.86	1.4426	0.44638	0.909	0.152	0.875	0.152	0.902	0.152	0.923	0.152	0.932	0.152	0.16	0.13	0.48	0.67	0.77	0.62	0.08	0.02	0.09	0.05
CG13426	2216407917	414	ubx	Dict	0.5908				0.45	0.7	0.38	0.06	0.15	0.916	0.737	0.881	0.325	0.908	0.669	0.924	0.823	0.952	0.891	0.6049	0.44638	0.91	0.152	0.876	0.152	0.902	0.152	0.929	0.152	0.943	0.152	0.74	0.7	0.38	0.42	0.12	0.27	0.29	0.22	0.23	0.25
CG13426	2216407917	414	vg	Dict	0.5316		**		0.44	0.05	0.07	0.02	0	0.652	0.421	0.579	0.174	0.634	0.373	0.685	0.505	0.717	0.583	2.5051	0.44638	0.654	0.152	0.582	0.152	0.64	0.152	0.697	0.152	0.75	0.152	0.06	0.04	0.24	0.3	0.26	0.18	0.09	0.08	0.22	0.23
CG13430	2216439837	415	dlp	Dict	0.6114		*		0.22	0.56	0.21	0.39	0.18	0.845	0.586	0.784	0.258	0.829	0.528	0.86	0.691	0.881	0.769	0.9958	0.217192	0.815	0.152	0.755	0.152	0.8	0.152	0.84	0.152	0.86	0.152	0.56	0.54	0.26	0.3	0.02	0.14	0.16	0.13	0.33	0.32
CG13430	2216439837	415	ds	Dict	0.5817				0.39	0.84	0.12	0.23	0.09	0.937	0.759	0.903	0.356	0.929	0.684	0.943	0.852	0.947	0.903	5.7655	0.217192	0.932	0.152	0.898	0.152	0.925	0.152	0.944	0.152	0.956	0.152	0.89	0.85	0.21	0.26	0.14	0.21	0.26	0.31	0.22	0.21
CG13430	2216439837	415	dsh	Dict	0.7031				0.68	0.51	0.24	0.14	0.1	0.91	0.72	0.873	0.33	0.9	0.649	0.92	0.793	0.934	0.84	1.1394	0.217192	0.91	0.152	0.871	0.152	0.9	0.152	0.923	0.152	0.937	0.152	0.68	0.66	0.19	0.35	0.33	0.27	0.26	0.26	0.32	0.3
CG13430	2216439837	415	fj	Dict	0.6003				0.84	0.35	0.16	0.16	0.06	0.938	0.763	0.909	0.355	0.932	0.705	0.952	0.857	0.956	0.929	2.0627	0.217192	0.928	0.152	0.894	0.152	0.921	0.152	0.941	0.152	0.953	0.152	0.59	0.54	0.46	0.61	0.39	0.27	0.29	0.29	0.37	0.34
CG13430	2216439837	415	hpo	Dict	0.667		**		0.4	0.22	0.22	0.18	0.14	0.782	0.521	0.706	0.219	0.762	0.468	0.822	0.631	0.829	0.822	0.3556	0.217192	0.755	0.152	0.68	0.152	0.736	0.152	0.794	0.152	0.822	0.152	0.33	0.33	0.09	0.2	0.34	0.31	0.21	0.19	0.06	0.07
CG13430	2216439837	415	kn	Dict	0.5937				0.64	0.28	0.11	0.11	0.28	0.824	0.637	0.777	0.296	0.81	0.565	0.844	0.703	0.867	0.779	0.3931	0.217192	0.815	0.152	0.763	0.152	0.803	0.152	0.833	0.152	0.858	0.152	0.43	0.39	0.35	0.43	0.14	0.05	0.01	0.04	0.51	0.51
CG13430	2216439837	415	med	Dict	0.6029				0.17	0.63	0.24	0.37	0.19	0.855	0.625	0.8	0.281	0.843	0.558	0.875	0.718	0.896	0.847	0.768	0.217192	0.84	0.152	0.789	0.152	0.828	0.152	0.862	0.152	0.893	0.152	0.54	0.51	0.21	0.19	0.24	0.32	0.14	0.06	0.15	0.1
CG13430	2216439837	415	nmo	Dict	0.6591				0.31	0.81	0.35	0.29	0.15	0.94	0.734	0.907	0.346	0.934	0.656	0.96	0.831	0.961	0.909	2.0873	0.217192	0.938	0.152	0.902	0.152	0.931	0.152	0.953	0.152	0.963	0.152	0.92	0.92	0.07	0.06	0.16	0.13	0.17	0.2	0.2	0.2
CG13430	2216439837	415	ser	Dict	0.57				0.11	0.78	0.3	0.27	0.16	0.893	0.688	0.842	0.31	0.879	0.621	0.905	0.793	0.918	0.869	0.4217	0.217192	0.876	0.152	0.833	0.152	0.868	0.152	0.891	0.152	0.919	0.152	0.69	0.66	0.2	0.16	0.36	0.45	0.2	0.11	0.1	0.06
CG13430	2216439837	415	tmod	Dict	0.5898				0.2	0.49	0.1	0.6	0.13	0.821	0.592	0.765	0.243	0.814	0.518	0.84	0.668	0.868	0.753	0.6584	0.217192	0.822	0.152	0.761	0.152	0.81	0.152	0.852	0.152	0.876	0.152	0.57	0.56	0.02	0.09	0.05	0.01	0.01	0.04	0.36	0.34
CG13430	2216439837	415	tx	Dict	0.511				0.06	0.74	0.53	0.01	0.18	0.914	0.73	0.868	0.33	0.9	0.655	0.928	0.801	0.928	0.839	0.9684	0.217192	0.903	0.152	0.866	0.152	0.895	0.152	0.917	0.152	0.929	0.152	0.74	0.75	0.23	0.15	0.01	0.04	0.43	0.45	0.19	0.2
CG13430	2216439837	415	ubx	Dict	0.615				0.45	0.7	0.38	0.06	0.15	0.916	0.737	0.881	0.325	0.908	0.669	0.924	0.823	0.952	0.891	0.6049	0.217192	0.91	0.152	0.876	0.152	0.902	0.152	0.929	0.152	0.943	0.152	0.74	0.7	0.38	0.42	0.12	0.27	0.29	0.22	0.23	0.25
CG13430	2216439837	415	wg	Dict	0.5849		*		0.35	0.58	0.01	0.12	0.19	0.778	0.575	0.724	0.25	0.762	0.522	0.796	0.661	0.804	0.737	1.6659	0.217192	0.776	0.152	0.726	0.152	0.764	0.152	0.798	0.152	0.846	0.152	0.62	0.59	0.24	0.31	0.06	0.04	0.13	0.15	0.18	0.17
CG13430	2216439837	415	wts	Dict	0.5836				0.36	0.69	0.38	0.08	0.22	0.894	0.718	0.857	0.324	0.886	0.645	0.917	0.809	0.926	0.882	0.9344	0.217192	0.887	0.152	0.845	0.152	0.877	0.152	0.901	0.152	0.918	0.152	0.79	0.77	0.09	0.2	0.16	0.12	0.41	0.42	0.22	0.24
CG1354	1009678430	54	egfr	Dict	0.7516		**		0.7	0.16	0.09	0.25	0.03	0.856	0.625	0.805	0.283	0.849	0.568	0.871	0.727	0.881	0.797	0.9394	0.0621938	0.846	0.152	0.794	0.152	0.834	0.152	0.864	0.152	0.892	0.152	0.11	0.12	0.18	0.37	0.69	0.62	0.11	0.15	0.33	0.32
CG1354	1009678430	54	mad	Dict	0.5349				0.84	0.08	0.2	0.2	0.07	0.894	0.724	0.866	0.359	0.887	0.661	0.91	0.811	0.922	0.847	0.5446	0.0621938	0.889	0.152	0.854	0.152	0.881	0.152	0.901	0.152	0.907	0.152	0.2	0.16	0.38	0.54	0.57	0.49	0.28	0.25	0.5	0.46
CG1354	1009678430	54	mer	Dict	0.5375				0.55	0.22	0.26	0.44	0.25	0.801	0.584	0.747	0.252	0.783	0.511	0.832	0.672	0.836	0.714	0.5311	0.0621938	0.805	0.152	0.756	0.152	0.794	0.152	0.829	0.152	0.878	0.152	0.03	0.03	0.1	0.25	0.57	0.55	0.11	0.08	0.08	0.08
CG1354	1009678430	54	rho	Dict	0.6168				0.42	0.64	0.27	0.24	0.06	0.883	0.676	0.842	0.302	0.873	0.632	0.896	0.784	0.901	0.867	0.6139	0.0621938	0.882	0.152	0.835	0.152	0.87	0.152	0.895	0.152	0.913	0.152	0.45	0.44	0.28	0.37	0.56	0.47	0.39	0.44	0.18	0.17
CG1354	1009678430	54	sav	Dict	0.6278				0.34	0.81	0.01	0.18	0.13	0.914	0.732	0.873	0.328	0.904	0.656	0.928	0.795	0.931	0.931	0.5947	0.0621938	0.909	0.152	0.868	0.152	0.902	0.152	0.929	0.152	0.952	0.152	0.58	0.56	0.05	0.15	0.59	0.59	0.16	0.23	0.3	0.28
CG1354	1009678430	54	socs36e	Dict	0.5502				0.74	0.08	0.47	0.09	0.11	0.886	0.717	0.854	0.333	0.88	0.654	0.898	0.808	0.901	0.891	0.4292	0.0621938	0.88	0.152	0.846	0.152	0.872	0.152	0.895	0.152	0.911	0.152	0.19	0.17	0.15	0.33	0.64	0.63	0.43	0.39	0.26	0.24
CG1354	1009678430	54	sog	Dict	0.7517		**		0.53	0.17	0.36	0.18	0.04	0.794	0.601	0.737	0.279	0.78	0.545	0.816	0.693	0.827	0.806	0.8503	0.0621938	0.793	0.152	0.735	0.152	0.778	0.152	0.817	0.152	0.858	0.152	0.13	0.17	0.18	0.03	0.7	0.73	0.04	0.09	0.43	0.41
CG1354	1009678430	54	tango14	Dict	0.5684				0.87	0.17	0.08	0.09	0.3	0.899	0.736	0.871	0.356	0.894	0.669	0.914	0.821	0.916	0.86	1.4426	0.0621938	0.909	0.152	0.875	0.152	0.902	0.152	0.923	0.152	0.932	0.152	0.16	0.13	0.48	0.67	0.77	0.62	0.08	0.02	0.09	0.05
CG1358	2203486834	309	ap	Dict	0.5757				0.13	0.81	0.11	0.15	0.22	0.856	0.666	0.815	0.299	0.847	0.607	0.87	0.745	0.871	0.826	0.394	0.239768	0.86	0.152	0.82	0.152	0.852	0.152	0.875	0.152	0.892	0.152	0.74	0.76	0.27	0.23	0.17	0.16	0.1	0.06	0.21	0.18
CG1358	2203486834	309	brk	Dict	0.7273		*		0.23	0.77	0.25	0.5	0.11	0.919	0.718	0.886	0.323	0.914	0.651	0.937	0.802	0.946	0.885	2.1159	0.239768	0.925	0.152	0.883	0.152	0.916	0.152	0.939	0.152	0.957	0.152	0.69	0.71	0.37	0.36	0.24	0.17	0.03	0.08	0.36	0.33
CG1358	2203486834	309	btd	Dict	0.7928		*		0.83	0.17	0.22	0.01	0.09	0.891	0.703	0.854	0.334	0.882	0.638	0.904	0.803	0.91	0.863	0.5246	0.239768	0.889	0.152	0.851	0.152	0.882	0.152	0.899	0.152	0.921	0.152	0.06	0.02	0.53	0.66	0.51	0.36	0.14	0.16	0.45	0.44
CG1358	2203486834	309	bx	Dict	0.7218		*		0.2	0.83	0.2	0.29	0.05	0.899	0.714	0.867	0.309	0.895	0.651	0.907	0.792	0.914	0.858	1.1999	0.239768	0.901	0.152	0.863	0.152	0.894	0.152	0.918	0.152	0.934	0.152	0.79	0.8	0.29	0.26	0.25	0.22	0.02	0.06	0.34	0.32
CG1358	2203486834	309	caup	Dict	0.5453		*		0.39	0.27	0.36	0.28	0.08	0.739	0.514	0.677	0.216	0.722	0.459	0.77	0.596	0.771	0.643	0.3834	0.239768	0.746	0.152	0.685	0.152	0.729	0.152	0.769	0.152	0.794	0.152	0.08	0.11	0.36	0.43	0.31	0.18	0.42	0.43	0.06	0.06
CG1358	2203486834	309	cg4267	Dict	0.6642		*		0.34	0.23	0.51	0.34	0.33	0.814	0.59	0.77	0.242	0.807	0.53	0.854	0.675	0.854	0.806	0.4521	0.239768	0.81	0.152	0.754	0.152	0.798	0.152	0.83	0.152	0.853	0.152	0.19	0.23	0.4	0.37	0.06	0.15	0.31	0.28	0.66	0.66
CG1358	2203486834	309	chn	Dict	0.5791				0.57	0.17	0.13	0.45	0.34	0.826	0.601	0.773	0.271	0.817	0.544	0.858	0.702	0.881	0.766	0.9439	0.239768	0.824	0.152	0.768	0.152	0.81	0.152	0.847	0.152	0.865	0.152	0.02	0.02	0.44	0.53	0.4	0.27	0.03	0.06	0.35	0.31
CG1358	2203486834	309	ct	Muta	0.5855		*		0.54	0.02	0.38	0.03	0.09	0.705	0.538	0.664	0.253	0.701	0.484	0.718	0.607	0.733	0.65	0.0056	0.239768	0.715	0.152	0.672	0.152	0.705	0.152	0.731	0.152	0.766	0.152	0.12	0.08	0.47	0.51	0.18	0.03	0.25	0.22	0.25	0.27
CG1358	2203486834	309	cv2	Dict	0.7679		**		0.56	0.49	0.08	0.38	0.25	0.87	0.685	0.828	0.295	0.86	0.6	0.893	0.763	0.898	0.844	0.5685	0.239768	0.859	0.152	0.814	0.152	0.85	0.152	0.878	0.152	0.914	0.152	0.31	0.35	0.38	0.43	0.3	0.25	0.13	0.11	0.62	0.59
CG1358	2203486834	309	cyce	Dict	0.6686				0.06	0.47	0.74	0.25	0.09	0.906	0.718	0.874	0.309	0.899	0.652	0.925	0.798	0.928	0.888	0.9349	0.239768	0.901	0.152	0.857	0.152	0.891	0.152	0.92	0.152	0.936	0.152	0.46	0.5	0.47	0.39	0.06	0.21	0.54	0.55	0.2	0.19
CG1358	2203486834	309	dally	Dict	0.8758		**		0.64	0.29	0.47	0.31	0.12	0.906	0.705	0.866	0.306	0.895	0.649	0.919	0.783	0.941	0.845	0.8955	0.239768	0.912	0.152	0.867	0.152	0.901	0.152	0.928	0.152	0.935	0.152	0.18	0.23	0.62	0.64	0.21	0.06	0.18	0.18	0.57	0.56
CG1358	2203486834	309	dll	Dict	0.5458				0.22	0.84	0.07	0.09	0.13	0.893	0.691	0.855	0.319	0.882	0.626	0.902	0.775	0.916	0.881	0.8412	0.239768	0.894	0.152	0.854	0.152	0.885	0.152	0.911	0.152	0.924	0.152	0.68	0.66	0.07	0.15	0.59	0.59	0.03	0.11	0.06	0.04
CG1358	2203486834	309	dpp	Dict	0.7848		*		0.44	0.75	0.19	0.01	0.02	0.891	0.7	0.852	0.316	0.883	0.644	0.907	0.794	0.913	0.856	0.4649	0.239768	0.891	0.152	0.853	0.152	0.884	0.152	0.902	0.152	0.92	0.152	0.58	0.59	0.35	0.4	0.49	0.42	0.15	0.2	0.22	0.21
CG1358	2203486834	309	egfr	Dict	0.5045				0.7	0.16	0.09	0.25	0.03	0.856	0.625	0.805	0.283	0.849	0.568	0.871	0.727	0.881	0.797	0.9394	0.239768	0.846	0.152	0.794	0.152	0.834	0.152	0.864	0.152	0.892	0.152	0.11	0.12	0.18	0.37	0.69	0.62	0.11	0.15	0.33	0.32
CG1358	2203486834	309	emc	Dict	0.5629				0.54	0.06	0.44	0.37	0.03	0.797	0.601	0.752	0.255	0.791	0.535	0.833	0.683	0.848	0.776	0.3552	0.239768	0.815	0.152	0.761	0.152	0.801	0.152	0.836	0.152	0.867	0.152	0.15	0.08	0.65	0.67	0.07	0.11	0.07	0.06	0.31	0.3
CG1358	2203486834	309	ex	Dict	0.5553				0.04	0.82	0.43	0.12	0.04	0.914	0.73	0.883	0.322	0.91	0.661	0.92	0.832	0.947	0.875	5.4462	0.239768	0.918	0.152	0.88	0.152	0.909	0.152	0.929	0.152	0.944	0.152	0.82	0.81	0.21	0.17	0.21	0.15	0.42	0.47	0.01	0.01
CG1358	2203486834	309	foxo	Dict	0.6055		*		0.34	0.29	0.45	0.29	0	0.752	0.553	0.703	0.242	0.741	0.489	0.775	0.636	0.778	0.742	0.2659	0.239768	0.751	0.152	0.698	0.152	0.739	0.152	0.775	0.152	0.79	0.152	0.2	0.25	0.53	0.51	0.07	0.07	0.17	0.18	0.3	0.28
CG1358	2203486834	309	fz	Dict	0.5942				0.06	0.7	0.17	0.26	0.24	0.85	0.643	0.804	0.281	0.839	0.574	0.861	0.74	0.866	0.798	0.4509	0.239768	0.841	0.152	0.79	0.152	0.826	0.152	0.861	0.152	0.882	0.152	0.77	0.78	0.15	0.08	0.06	0.08	0.02	0.03	0.39	0.4
CG1358	2203486834	309	kay	Dict	0.526				0.28	0.64	0.08	0.07	0.3	0.825	0.609	0.772	0.243	0.814	0.538	0.851	0.678	0.862	0.785	0.4534	0.239768	0.821	0.152	0.767	0.152	0.806	0.152	0.839	0.152	0.857	0.152	0.47	0.49	0.19	0.23	0.32	0.32	0.18	0.13	0.28	0.24
CG1358	2203486834	309	mad	Dict	0.5518				0.84	0.08	0.2	0.2	0.07	0.894	0.724	0.866	0.359	0.887	0.661	0.91	0.811	0.922	0.847	0.5446	0.239768	0.889	0.152	0.854	0.152	0.881	0.152	0.901	0.152	0.907	0.152	0.2	0.16	0.38	0.54	0.57	0.49	0.28	0.25	0.5	0.46
CG1358	2203486834	309	mpk2	Dict	0.6435		*		0.18	0.68	0.09	0.37	0.15	0.846	0.633	0.806	0.278	0.839	0.57	0.862	0.742	0.889	0.829	0.4463	0.239768	0.849	0.152	0.797	0.152	0.837	0.152	0.878	0.152	0.903	0.152	0.61	0.59	0.05	0.06	0.23	0.26	0.05	0.09	0.59	0.58
CG1358	2203486834	309	pnt	Dict	0.622				0.28	0.69	0.03	0.39	0.09	0.858	0.653	0.816	0.281	0.853	0.584	0.873	0.772	0.886	0.829	0.9325	0.239768	0.843	0.152	0.802	0.152	0.836	0.152	0.865	0.152	0.891	0.152	0.52	0.53	0.21	0.26	0.4	0.37	0.11	0.04	0.34	0.29
CG1358	2203486834	309	poc1	Dict	0.6596		*		0.34	0.49	0.08	0.28	0.08	0.801	0.576	0.742	0.257	0.791	0.523	0.832	0.664	0.843	0.724	0.4028	0.239768	0.795	0.152	0.734	0.152	0.78	0.152	0.824	0.152	0.87	0.152	0.31	0.29	0.02	0.07	0.38	0.38	0.25	0.29	0.69	0.68
CG1358	2203486834	309	rho	Dict	0.7005		*		0.42	0.64	0.27	0.24	0.06	0.883	0.676	0.842	0.302	0.873	0.632	0.896	0.784	0.901	0.867	0.6139	0.239768	0.882	0.152	0.835	0.152	0.87	0.152	0.895	0.152	0.913	0.152	0.45	0.44	0.28	0.37	0.56	0.47	0.39	0.44	0.18	0.17
CG1358	2203486834	309	sav	Dict	0.6407				0.34	0.81	0.01	0.18	0.13	0.914	0.732	0.873	0.328	0.904	0.656	0.928	0.795	0.931	0.931	0.5947	0.239768	0.909	0.152	0.868	0.152	0.902	0.152	0.929	0.152	0.952	0.152	0.58	0.56	0.05	0.15	0.59	0.59	0.16	0.23	0.3	0.28
CG1358	2203486834	309	sgg	Dict	0.7297		**		0.51	0.37	0.25	0.17	0.44	0.862	0.625	0.799	0.263	0.848	0.576	0.881	0.727	0.9	0.823	1.7731	0.239768	0.841	0.152	0.783	0.152	0.828	0.152	0.862	0.152	0.907	0.152	0.21	0.23	0.29	0.34	0.24	0.18	0.23	0.22	0.74	0.74
CG1358	2203486834	309	sls	Dict	0.6192				0.72	0.33	0.05	0.14	0.22	0.84	0.68	0.801	0.314	0.832	0.622	0.857	0.744	0.874	0.801	0.5182	0.239768	0.839	0.152	0.799	0.152	0.832	0.152	0.859	0.152	0.883	0.152	0.03	0.07	0.46	0.61	0.64	0.52	0.12	0.06	0.21	0.16
CG1358	2203486834	309	spi	Dict	0.694		*		0.23	0.37	0.57	0.11	0.37	0.827	0.601	0.778	0.242	0.821	0.54	0.837	0.698	0.84	0.809	0.4719	0.239768	0.83	0.152	0.779	0.152	0.818	0.152	0.856	0.152	0.893	0.152	0.4	0.43	0.43	0.36	0.07	0.16	0.33	0.31	0.43	0.45
CG1358	2203486834	309	tai	Dict	0.7624		*		0.71	0.17	0.56	0.09	0.01	0.894	0.73	0.862	0.338	0.889	0.654	0.907	0.805	0.908	0.848	0.4654	0.239768	0.899	0.152	0.868	0.152	0.893	0.152	0.908	0.152	0.921	0.152	0	0.07	0.78	0.84	0.33	0.1	0.31	0.32	0.15	0.14
CG1358	2203486834	309	tango14	Dict	0.5631				0.87	0.17	0.08	0.09	0.3	0.899	0.736	0.871	0.356	0.894	0.669	0.914	0.821	0.916	0.86	1.4426	0.239768	0.909	0.152	0.875	0.152	0.902	0.152	0.923	0.152	0.932	0.152	0.16	0.13	0.48	0.67	0.77	0.62	0.08	0.02	0.09	0.05
CG1358	2203486834	309	tx	Dict	0.6381				0.06	0.74	0.53	0.01	0.18	0.914	0.73	0.868	0.33	0.9	0.655	0.928	0.801	0.928	0.839	0.9684	0.239768	0.903	0.152	0.866	0.152	0.895	0.152	0.917	0.152	0.929	0.152	0.74	0.75	0.23	0.15	0.01	0.04	0.43	0.45	0.19	0.2
CG13646	3220780340	889	btd	Dict	0.6848				0.83	0.17	0.22	0.01	0.09	0.891	0.703	0.854	0.334	0.882	0.638	0.904	0.803	0.91	0.863	0.5246	0.0581465	0.889	0.152	0.851	0.152	0.882	0.152	0.899	0.152	0.921	0.152	0.06	0.02	0.53	0.66	0.51	0.36	0.14	0.16	0.45	0.44
CG13646	3220780340	889	cg12934	Dict	0.532		*		0.35	0.21	0.02	0.25	0.4	0.764	0.482	0.69	0.188	0.751	0.41	0.785	0.57	0.829	0.757	1.9159	0.0581465	0.754	0.152	0.677	0.152	0.735	0.152	0.784	0.152	0.818	0.152	0.03	0.05	0.27	0.39	0.55	0.43	0.12	0.17	0.32	0.33
CG13646	3220780340	889	cg34394	Dict	0.5644		*		0.47	0.1	0.1	0.25	0.48	0.803	0.521	0.728	0.219	0.777	0.464	0.823	0.611	0.862	0.716	2.1385	0.0581465	0.804	0.152	0.728	0.152	0.785	0.152	0.843	0.152	0.876	0.152	0.11	0.08	0.38	0.51	0.58	0.42	0.19	0.24	0.3	0.32
CG13646	3220780340	889	dpp	Dict	0.5265				0.44	0.75	0.19	0.01	0.02	0.891	0.7	0.852	0.316	0.883	0.644	0.907	0.794	0.913	0.856	0.4649	0.0581465	0.891	0.152	0.853	0.152	0.884	0.152	0.902	0.152	0.92	0.152	0.58	0.59	0.35	0.4	0.49	0.42	0.15	0.2	0.22	0.21
CG13646	3220780340	889	egfr	Dict	0.6158				0.7	0.16	0.09	0.25	0.03	0.856	0.625	0.805	0.283	0.849	0.568	0.871	0.727	0.881	0.797	0.9394	0.0581465	0.846	0.152	0.794	0.152	0.834	0.152	0.864	0.152	0.892	0.152	0.11	0.12	0.18	0.37	0.69	0.62	0.11	0.15	0.33	0.32
CG13646	3220780340	889	gef64c	Dict	0.5291		*		0.34	0.17	0.06	0.37	0.36	0.75	0.491	0.683	0.193	0.737	0.434	0.789	0.587	0.811	0.694	1.6637	0.0581465	0.755	0.152	0.672	0.152	0.734	0.152	0.79	0.152	0.821	0.152	0.02	0.01	0.2	0.32	0.54	0.43	0.26	0.3	0.29	0.29
CG13646	3220780340	889	mad	Dict	0.5628				0.84	0.08	0.2	0.2	0.07	0.894	0.724	0.866	0.359	0.887	0.661	0.91	0.811	0.922	0.847	0.5446	0.0581465	0.889	0.152	0.854	0.152	0.881	0.152	0.901	0.152	0.907	0.152	0.2	0.16	0.38	0.54	0.57	0.49	0.28	0.25	0.5	0.46
CG13646	3220780340	889	mer	Dict	0.5542				0.55	0.22	0.26	0.44	0.25	0.801	0.584	0.747	0.252	0.783	0.511	0.832	0.672	0.836	0.714	0.5311	0.0581465	0.805	0.152	0.756	0.152	0.794	0.152	0.829	0.152	0.878	0.152	0.03	0.03	0.1	0.25	0.57	0.55	0.11	0.08	0.08	0.08
CG13646	3220780340	889	neur	Dict	0.6152		*		0.45	0.24	0.14	0.21	0.46	0.814	0.539	0.742	0.227	0.798	0.476	0.833	0.64	0.843	0.761	2.4309	0.0581465	0.81	0.152	0.744	0.152	0.797	0.152	0.841	0.152	0.868	0.152	0.06	0.09	0.43	0.54	0.56	0.4	0.18	0.23	0.3	0.32
CG13646	3220780340	889	rho	Dict	0.541				0.42	0.64	0.27	0.24	0.06	0.883	0.676	0.842	0.302	0.873	0.632	0.896	0.784	0.901	0.867	0.6139	0.0581465	0.882	0.152	0.835	0.152	0.87	0.152	0.895	0.152	0.913	0.152	0.45	0.44	0.28	0.37	0.56	0.47	0.39	0.44	0.18	0.17
CG13646	3220780340	889	sd	Muta	0.5844		*		0.58	0.16	0.17	0.41	0.11	0.76	0.568	0.706	0.264	0.746	0.497	0.791	0.631	0.798	0.704	0.009	0.0581465	0.778	0.152	0.726	0.152	0.767	0.152	0.799	0.152	0.844	0.152	0.13	0.14	0.1	0.29	0.69	0.63	0.11	0.16	0.02	0.04
CG13646	3220780340	889	sls	Dict	0.5582				0.72	0.33	0.05	0.14	0.22	0.84	0.68	0.801	0.314	0.832	0.622	0.857	0.744	0.874	0.801	0.5182	0.0581465	0.839	0.152	0.799	0.152	0.832	0.152	0.859	0.152	0.883	0.152	0.03	0.07	0.46	0.61	0.64	0.52	0.12	0.06	0.21	0.16
CG13646	3220780340	889	socs36e	Dict	0.6567				0.74	0.08	0.47	0.09	0.11	0.886	0.717	0.854	0.333	0.88	0.654	0.898	0.808	0.901	0.891	0.4292	0.0581465	0.88	0.152	0.846	0.152	0.872	0.152	0.895	0.152	0.911	0.152	0.19	0.17	0.15	0.33	0.64	0.63	0.43	0.39	0.26	0.24
CG13646	3220780340	889	tai	Dict	0.5665				0.71	0.17	0.56	0.09	0.01	0.894	0.73	0.862	0.338	0.889	0.654	0.907	0.805	0.908	0.848	0.4654	0.0581465	0.899	0.152	0.868	0.152	0.893	0.152	0.908	0.152	0.921	0.152	0	0.07	0.78	0.84	0.33	0.1	0.31	0.32	0.15	0.14
CG13646	3220780340	889	tango14	Dict	0.7013				0.87	0.17	0.08	0.09	0.3	0.899	0.736	0.871	0.356	0.894	0.669	0.914	0.821	0.916	0.86	1.4426	0.0581465	0.909	0.152	0.875	0.152	0.902	0.152	0.923	0.152	0.932	0.152	0.16	0.13	0.48	0.67	0.77	0.62	0.08	0.02	0.09	0.05
CG13653	3221021339	891	dco	Dict	0.5652		*		0.23	0.23	0.11	0.84	0.13	0.829	0.53	0.77	0.204	0.815	0.449	0.846	0.65	0.848	0.815	0.6512	0.317266	0.845	0.152	0.775	0.152	0.828	0.152	0.872	0.152	0.891	0.152	0.18	0.13	0.33	0.29	0.18	0.25	0.24	0.26	0.44	0.41
CG13653	3221021339	891	dgo	Dict	0.6554		*		0.31	0.6	0.04	0.22	0.16	0.815	0.614	0.762	0.276	0.801	0.553	0.832	0.684	0.856	0.801	0.4284	0.317266	0.789	0.152	0.742	0.152	0.777	0.152	0.819	0.152	0.84	0.152	0.66	0.61	0.24	0.26	0.17	0.23	0.22	0.26	0.23	0.21
CG13653	3221021339	891	dll	Dict	0.5937				0.22	0.84	0.07	0.09	0.13	0.893	0.691	0.855	0.319	0.882	0.626	0.902	0.775	0.916	0.881	0.8412	0.317266	0.894	0.152	0.854	0.152	0.885	0.152	0.911	0.152	0.924	0.152	0.68	0.66	0.07	0.15	0.59	0.59	0.03	0.11	0.06	0.04
CG13653	3221021339	891	ds	Dict	0.8038		*		0.39	0.84	0.12	0.23	0.09	0.937	0.759	0.903	0.356	0.929	0.684	0.943	0.852	0.947	0.903	5.7655	0.317266	0.932	0.152	0.898	0.152	0.925	0.152	0.944	0.152	0.956	0.152	0.89	0.85	0.21	0.26	0.14	0.21	0.26	0.31	0.22	0.21
CG13653	3221021339	891	ex	Dict	0.5108				0.04	0.82	0.43	0.12	0.04	0.914	0.73	0.883	0.322	0.91	0.661	0.92	0.832	0.947	0.875	5.4462	0.317266	0.918	0.152	0.88	0.152	0.909	0.152	0.929	0.152	0.944	0.152	0.82	0.81	0.21	0.17	0.21	0.15	0.42	0.47	0.01	0.01
CG13653	3221021339	891	fj	Dict	0.6424				0.84	0.35	0.16	0.16	0.06	0.938	0.763	0.909	0.355	0.932	0.705	0.952	0.857	0.956	0.929	2.0627	0.317266	0.928	0.152	0.894	0.152	0.921	0.152	0.941	0.152	0.953	0.152	0.59	0.54	0.46	0.61	0.39	0.27	0.29	0.29	0.37	0.34
CG13653	3221021339	891	ft	Dict	0.9078		**	+	0.39	0.75	0.08	0.35	0.1	0.927	0.72	0.889	0.323	0.919	0.649	0.933	0.808	0.941	0.888	4.3023	0.317266	0.916	0.152	0.877	0.152	0.907	0.152	0.938	0.152	0.95	0.152	0.77	0.7	0.42	0.43	0.25	0.36	0.22	0.28	0.21	0.2
CG13653	3221021339	891	mats	Dict	0.8231		**		0.58	0.58	0.2	0.15	0.19	0.892	0.685	0.853	0.318	0.882	0.628	0.899	0.766	0.9	0.866	3.5887	0.317266	0.884	0.152	0.843	0.152	0.875	0.152	0.897	0.152	0.918	0.152	0.72	0.65	0.54	0.62	0.07	0.12	0.01	0.04	0.07	0.04
CG13653	3221021339	891	sav	Dict	0.5625				0.34	0.81	0.01	0.18	0.13	0.914	0.732	0.873	0.328	0.904	0.656	0.928	0.795	0.931	0.931	0.5947	0.317266	0.909	0.152	0.868	0.152	0.902	0.152	0.929	0.152	0.952	0.152	0.58	0.56	0.05	0.15	0.59	0.59	0.16	0.23	0.3	0.28
CG13653	3221021339	891	sd	Dict	0.6721		*		0.34	0.63	0.37	0.24	0.02	0.856	0.667	0.823	0.286	0.851	0.597	0.87	0.767	0.871	0.849	5.3633	0.317266	0.87	0.152	0.824	0.152	0.861	0.152	0.885	0.152	0.905	0.152	0.7	0.64	0.42	0.45	0.08	0.25	0.3	0.25	0.11	0.09
CG13653	3221021339	891	ser	Dict	0.5433				0.11	0.78	0.3	0.27	0.16	0.893	0.688	0.842	0.31	0.879	0.621	0.905	0.793	0.918	0.869	0.4217	0.317266	0.876	0.152	0.833	0.152	0.868	0.152	0.891	0.152	0.919	0.152	0.69	0.66	0.2	0.16	0.36	0.45	0.2	0.11	0.1	0.06
CG13653	3221021339	891	stg	Dict	0.6177				0.25	0.54	0.35	0.48	0.09	0.864	0.657	0.816	0.263	0.854	0.585	0.882	0.756	0.884	0.858	1.0297	0.317266	0.866	0.152	0.81	0.152	0.852	0.152	0.889	0.152	0.914	0.152	0.63	0.59	0.01	0.07	0.07	0.06	0.41	0.44	0.37	0.33
CG13653	3221021339	891	ubx	Dict	0.6835				0.45	0.7	0.38	0.06	0.15	0.916	0.737	0.881	0.325	0.908	0.669	0.924	0.823	0.952	0.891	0.6049	0.317266	0.91	0.152	0.876	0.152	0.902	0.152	0.929	0.152	0.943	0.152	0.74	0.7	0.38	0.42	0.12	0.27	0.29	0.22	0.23	0.25
CG13653	3221021339	891	vn	Dict	0.5899		*		0.07	0.55	0.02	0.2	0.09	0.774	0.525	0.715	0.229	0.762	0.472	0.814	0.609	0.817	0.672	1.2207	0.317266	0.762	0.152	0.696	0.152	0.746	0.152	0.799	0.152	0.855	0.152	0.46	0.41	0.22	0.15	0.38	0.43	0.37	0.4	0.27	0.29
CG13653	3221021339	891	wts	Dict	0.5219				0.36	0.69	0.38	0.08	0.22	0.894	0.718	0.857	0.324	0.886	0.645	0.917	0.809	0.926	0.882	0.9344	0.317266	0.887	0.152	0.845	0.152	0.877	0.152	0.901	0.152	0.918	0.152	0.79	0.77	0.09	0.2	0.16	0.12	0.41	0.42	0.22	0.24
CG13698	3118090847	524	dlp	Dict	0.5135				0.22	0.56	0.21	0.39	0.18	0.845	0.586	0.784	0.258	0.829	0.528	0.86	0.691	0.881	0.769	0.9958	0.0505745	0.815	0.152	0.755	0.152	0.8	0.152	0.84	0.152	0.86	0.152	0.56	0.54	0.26	0.3	0.02	0.14	0.16	0.13	0.33	0.32
CG13698	3118090847	524	limk1	Dict	0.549		*		0.03	0.2	0.47	0.05	0.21	0.738	0.462	0.663	0.171	0.724	0.399	0.769	0.562	0.782	0.695	0.4325	0.0505745	0.735	0.152	0.66	0.152	0.721	0.152	0.762	0.152	0.797	0.152	0.14	0.08	0.52	0.45	0.22	0.39	0.19	0.16	0.31	0.31
CG13721	3104496038	530	ap	Dict	0.5087				0.13	0.81	0.11	0.15	0.22	0.856	0.666	0.815	0.299	0.847	0.607	0.87	0.745	0.871	0.826	0.394	0.337476	0.86	0.152	0.82	0.152	0.852	0.152	0.875	0.152	0.892	0.152	0.74	0.76	0.27	0.23	0.17	0.16	0.1	0.06	0.21	0.18
CG13721	3104496038	530	brk	Dict	0.5515				0.23	0.77	0.25	0.5	0.11	0.919	0.718	0.886	0.323	0.914	0.651	0.937	0.802	0.946	0.885	2.1159	0.337476	0.925	0.152	0.883	0.152	0.916	0.152	0.939	0.152	0.957	0.152	0.69	0.71	0.37	0.36	0.24	0.17	0.03	0.08	0.36	0.33
CG13721	3104496038	530	bun	Dict	0.7313		*		0.18	0.78	0.06	0.17	0.19	0.885	0.664	0.841	0.31	0.875	0.609	0.91	0.742	0.935	0.885	0.7822	0.337476	0.887	0.152	0.834	0.152	0.874	0.152	0.905	0.152	0.925	0.152	0.54	0.52	0.04	0.14	0.61	0.58	0.13	0.22	0.05	0.09
CG13721	3104496038	530	bx	Dict	0.5475				0.2	0.83	0.2	0.29	0.05	0.899	0.714	0.867	0.309	0.895	0.651	0.907	0.792	0.914	0.858	1.1999	0.337476	0.901	0.152	0.863	0.152	0.894	0.152	0.918	0.152	0.934	0.152	0.79	0.8	0.29	0.26	0.25	0.22	0.02	0.06	0.34	0.32
CG13721	3104496170	530	cg33299	Dict	0.5323		*		0.12	0.4	0.25	0.04	0.13	0.694	0.445	0.623	0.173	0.677	0.379	0.725	0.555	0.757	0.669	0.2309	0.256727	0.674	0.152	0.605	0.152	0.658	0.152	0.702	0.152	0.723	0.152	0.38	0.36	0.07	0.06	0.21	0.25	0.26	0.2	0.16	0.19
CG13721	3104496038	530	d	Dict	0.6811		**		0.16	0.46	0.09	0.05	0.56	0.732	0.49	0.664	0.199	0.718	0.433	0.759	0.581	0.795	0.674	0.2325	0.337476	0.728	0.152	0.67	0.152	0.715	0.152	0.75	0.152	0.79	0.152	0.42	0.39	0.05	0.02	0.29	0.29	0.05	0.03	0.37	0.4
CG13721	3104496170	530	dad	Dict	0.5379				0.6	0.35	0.36	0.11	0.33	0.869	0.651	0.825	0.301	0.858	0.591	0.884	0.743	0.901	0.864	0.3276	0.256727	0.857	0.152	0.812	0.152	0.849	0.152	0.877	0.152	0.897	0.152	0.02	0.03	0.18	0.36	0.74	0.69	0.29	0.21	0.1	0.04
CG13721	3104496038	530	dgo	Dict	0.5388				0.31	0.6	0.04	0.22	0.16	0.815	0.614	0.762	0.276	0.801	0.553	0.832	0.684	0.856	0.801	0.4284	0.337476	0.789	0.152	0.742	0.152	0.777	0.152	0.819	0.152	0.84	0.152	0.66	0.61	0.24	0.26	0.17	0.23	0.22	0.26	0.23	0.21
CG13721	3104496038	530	dll	Dict	0.6112				0.22	0.84	0.07	0.09	0.13	0.893	0.691	0.855	0.319	0.882	0.626	0.902	0.775	0.916	0.881	0.8412	0.337476	0.894	0.152	0.854	0.152	0.885	0.152	0.911	0.152	0.924	0.152	0.68	0.66	0.07	0.15	0.59	0.59	0.03	0.11	0.06	0.04
CG13721	3104496038	530	dpp	Dict	0.544				0.44	0.75	0.19	0.01	0.02	0.891	0.7	0.852	0.316	0.883	0.644	0.907	0.794	0.913	0.856	0.4649	0.337476	0.891	0.152	0.853	0.152	0.884	0.152	0.902	0.152	0.92	0.152	0.58	0.59	0.35	0.4	0.49	0.42	0.15	0.2	0.22	0.21
CG13721	3104496038	530	ds	Dict	0.6697				0.39	0.84	0.12	0.23	0.09	0.937	0.759	0.903	0.356	0.929	0.684	0.943	0.852	0.947	0.903	5.7655	0.337476	0.932	0.152	0.898	0.152	0.925	0.152	0.944	0.152	0.956	0.152	0.89	0.85	0.21	0.26	0.14	0.21	0.26	0.31	0.22	0.21
CG13721	3104496038	530	ex	Dict	0.6366				0.04	0.82	0.43	0.12	0.04	0.914	0.73	0.883	0.322	0.91	0.661	0.92	0.832	0.947	0.875	5.4462	0.337476	0.918	0.152	0.88	0.152	0.909	0.152	0.929	0.152	0.944	0.152	0.82	0.81	0.21	0.17	0.21	0.15	0.42	0.47	0.01	0.01
CG13721	3104496170	530	fj	Dict	0.5189				0.84	0.35	0.16	0.16	0.06	0.938	0.763	0.909	0.355	0.932	0.705	0.952	0.857	0.956	0.929	2.0627	0.256727	0.928	0.152	0.894	0.152	0.921	0.152	0.941	0.152	0.953	0.152	0.59	0.54	0.46	0.61	0.39	0.27	0.29	0.29	0.37	0.34
CG13721	3104496038	530	ft	Dict	0.618				0.39	0.75	0.08	0.35	0.1	0.927	0.72	0.889	0.323	0.919	0.649	0.933	0.808	0.941	0.888	4.3023	0.337476	0.916	0.152	0.877	0.152	0.907	0.152	0.938	0.152	0.95	0.152	0.77	0.7	0.42	0.43	0.25	0.36	0.22	0.28	0.21	0.2
CG13721	3104496038	530	hh	Dict	0.5397		*		0.06	0.4	0.21	0.41	0.25	0.803	0.507	0.73	0.204	0.783	0.439	0.832	0.587	0.842	0.718	1.466	0.337476	0.792	0.152	0.721	0.152	0.776	0.152	0.828	0.152	0.888	0.152	0.37	0.39	0.3	0.3	0.25	0.15	0.14	0.17	0.55	0.54
CG13721	3104496170	530	inv	Dict	0.551		*		0.21	0.21	0.49	0.43	0.37	0.794	0.541	0.743	0.234	0.786	0.48	0.811	0.656	0.863	0.766	0.3255	0.256727	0.798	0.152	0.739	0.152	0.786	0.152	0.826	0.152	0.867	0.152	0.3	0.27	0.03	0.1	0.19	0.2	0.61	0.57	0.04	0.1
CG13721	3104496038	530	luna	Dict	0.5789				0.18	0.75	0.2	0.38	0.08	0.869	0.647	0.82	0.292	0.86	0.599	0.88	0.733	0.882	0.805	0.3695	0.337476	0.861	0.152	0.819	0.152	0.852	0.152	0.879	0.152	0.903	0.152	0.62	0.62	0.08	0.12	0.38	0.41	0.28	0.2	0.3	0.25
CG13721	3104496170	530	luna	Dict	0.5179				0.18	0.75	0.2	0.38	0.08	0.869	0.647	0.82	0.292	0.86	0.599	0.88	0.733	0.882	0.805	0.3695	0.256727	0.861	0.152	0.819	0.152	0.852	0.152	0.879	0.152	0.903	0.152	0.62	0.62	0.08	0.12	0.38	0.41	0.28	0.2	0.3	0.25
CG13721	3104496170	530	mad	Dict	0.5075				0.84	0.08	0.2	0.2	0.07	0.894	0.724	0.866	0.359	0.887	0.661	0.91	0.811	0.922	0.847	0.5446	0.256727	0.889	0.152	0.854	0.152	0.881	0.152	0.901	0.152	0.907	0.152	0.2	0.16	0.38	0.54	0.57	0.49	0.28	0.25	0.5	0.46
CG13721	3104496038	530	med	Dict	0.5947				0.17	0.63	0.24	0.37	0.19	0.855	0.625	0.8	0.281	0.843	0.558	0.875	0.718	0.896	0.847	0.768	0.337476	0.84	0.152	0.789	0.152	0.828	0.152	0.862	0.152	0.893	0.152	0.54	0.51	0.21	0.19	0.24	0.32	0.14	0.06	0.15	0.1
CG13721	3104496170	530	os	Dict	0.6043		*		0.36	0.12	0.65	0.28	0	0.816	0.603	0.775	0.255	0.808	0.547	0.844	0.699	0.858	0.789	0.2858	0.256727	0.823	0.152	0.777	0.152	0.814	0.152	0.838	0.152	0.855	0.152	0.09	0.09	0.09	0.04	0.44	0.5	0.58	0.54	0.23	0.18
CG13721	3104496038	530	pnt	Dict	0.587				0.28	0.69	0.03	0.39	0.09	0.858	0.653	0.816	0.281	0.853	0.584	0.873	0.772	0.886	0.829	0.9325	0.337476	0.843	0.152	0.802	0.152	0.836	0.152	0.865	0.152	0.891	0.152	0.52	0.53	0.21	0.26	0.4	0.37	0.11	0.04	0.34	0.29
CG13721	3104496038	530	rho	Dict	0.5179				0.42	0.64	0.27	0.24	0.06	0.883	0.676	0.842	0.302	0.873	0.632	0.896	0.784	0.901	0.867	0.6139	0.337476	0.882	0.152	0.835	0.152	0.87	0.152	0.895	0.152	0.913	0.152	0.45	0.44	0.28	0.37	0.56	0.47	0.39	0.44	0.18	0.17
CG13721	3104496038	530	sav	Dict	0.5295				0.34	0.81	0.01	0.18	0.13	0.914	0.732	0.873	0.328	0.904	0.656	0.928	0.795	0.931	0.931	0.5947	0.337476	0.909	0.152	0.868	0.152	0.902	0.152	0.929	0.152	0.952	0.152	0.58	0.56	0.05	0.15	0.59	0.59	0.16	0.23	0.3	0.28
CG13721	3104496038	530	ser	Dict	0.6264				0.11	0.78	0.3	0.27	0.16	0.893	0.688	0.842	0.31	0.879	0.621	0.905	0.793	0.918	0.869	0.4217	0.337476	0.876	0.152	0.833	0.152	0.868	0.152	0.891	0.152	0.919	0.152	0.69	0.66	0.2	0.16	0.36	0.45	0.2	0.11	0.1	0.06
CG13721	3104496170	530	sls	Dict	0.5539				0.72	0.33	0.05	0.14	0.22	0.84	0.68	0.801	0.314	0.832	0.622	0.857	0.744	0.874	0.801	0.5182	0.256727	0.839	0.152	0.799	0.152	0.832	0.152	0.859	0.152	0.883	0.152	0.03	0.07	0.46	0.61	0.64	0.52	0.12	0.06	0.21	0.16
CG13721	3104496170	530	tango14	Dict	0.5472				0.87	0.17	0.08	0.09	0.3	0.899	0.736	0.871	0.356	0.894	0.669	0.914	0.821	0.916	0.86	1.4426	0.256727	0.909	0.152	0.875	0.152	0.902	0.152	0.923	0.152	0.932	0.152	0.16	0.13	0.48	0.67	0.77	0.62	0.08	0.02	0.09	0.05
CG13721	3104496038	530	ubx	Dict	0.7303				0.45	0.7	0.38	0.06	0.15	0.916	0.737	0.881	0.325	0.908	0.669	0.924	0.823	0.952	0.891	0.6049	0.337476	0.91	0.152	0.876	0.152	0.902	0.152	0.929	0.152	0.943	0.152	0.74	0.7	0.38	0.42	0.12	0.27	0.29	0.22	0.23	0.25
CG13723	3117259748	524	dlp	Dict	0.6127		*		0.22	0.56	0.21	0.39	0.18	0.845	0.586	0.784	0.258	0.829	0.528	0.86	0.691	0.881	0.769	0.9958	0.00686413	0.815	0.152	0.755	0.152	0.8	0.152	0.84	0.152	0.86	0.152	0.56	0.54	0.26	0.3	0.02	0.14	0.16	0.13	0.33	0.32
CG13723	3117259748	524	os	Dict	0.5539				0.36	0.12	0.65	0.28	0	0.816	0.603	0.775	0.255	0.808	0.547	0.844	0.699	0.858	0.789	0.2858	0.00686413	0.823	0.152	0.777	0.152	0.814	0.152	0.838	0.152	0.855	0.152	0.09	0.09	0.09	0.04	0.44	0.5	0.58	0.54	0.23	0.18
CG13723	3117259748	524	rpt1	Dict	0.6579		**		0.04	0.25	0.66	0.15	0.07	0.793	0.555	0.721	0.245	0.77	0.503	0.816	0.623	0.817	0.725	0.264	0.00686413	0.775	0.152	0.72	0.152	0.763	0.152	0.791	0.152	0.839	0.152	0.12	0.08	0.45	0.35	0.32	0.47	0.36	0.32	0.25	0.23
CG13723	3117259748	524	sd	Dict	0.5431				0.34	0.63	0.37	0.24	0.02	0.856	0.667	0.823	0.286	0.851	0.597	0.87	0.767	0.871	0.849	5.3633	0.00686413	0.87	0.152	0.824	0.152	0.861	0.152	0.885	0.152	0.905	0.152	0.7	0.64	0.42	0.45	0.08	0.25	0.3	0.25	0.11	0.09
CG13723	3117259748	524	ser	Dict	0.61				0.11	0.78	0.3	0.27	0.16	0.893	0.688	0.842	0.31	0.879	0.621	0.905	0.793	0.918	0.869	0.4217	0.00686413	0.876	0.152	0.833	0.152	0.868	0.152	0.891	0.152	0.919	0.152	0.69	0.66	0.2	0.16	0.36	0.45	0.2	0.11	0.1	0.06
CG13723	3117259748	524	ubx	Dict	0.5907				0.45	0.7	0.38	0.06	0.15	0.916	0.737	0.881	0.325	0.908	0.669	0.924	0.823	0.952	0.891	0.6049	0.00686413	0.91	0.152	0.876	0.152	0.902	0.152	0.929	0.152	0.943	0.152	0.74	0.7	0.38	0.42	0.12	0.27	0.29	0.22	0.23	0.25
CG13773	2106907442	178	ap	Dict	0.5783				0.13	0.81	0.11	0.15	0.22	0.856	0.666	0.815	0.299	0.847	0.607	0.87	0.745	0.871	0.826	0.394	0.141213	0.86	0.152	0.82	0.152	0.852	0.152	0.875	0.152	0.892	0.152	0.74	0.76	0.27	0.23	0.17	0.16	0.1	0.06	0.21	0.18
CG13773	2106907442	178	brk	Dict	0.6911				0.23	0.77	0.25	0.5	0.11	0.919	0.718	0.886	0.323	0.914	0.651	0.937	0.802	0.946	0.885	2.1159	0.141213	0.925	0.152	0.883	0.152	0.916	0.152	0.939	0.152	0.957	0.152	0.69	0.71	0.37	0.36	0.24	0.17	0.03	0.08	0.36	0.33
CG13773	2106907442	178	bun	Dict	0.7365		*		0.18	0.78	0.06	0.17	0.19	0.885	0.664	0.841	0.31	0.875	0.609	0.91	0.742	0.935	0.885	0.7822	0.141213	0.887	0.152	0.834	0.152	0.874	0.152	0.905	0.152	0.925	0.152	0.54	0.52	0.04	0.14	0.61	0.58	0.13	0.22	0.05	0.09
CG13773	2106907442	178	bx	Dict	0.5898				0.2	0.83	0.2	0.29	0.05	0.899	0.714	0.867	0.309	0.895	0.651	0.907	0.792	0.914	0.858	1.1999	0.141213	0.901	0.152	0.863	0.152	0.894	0.152	0.918	0.152	0.934	0.152	0.79	0.8	0.29	0.26	0.25	0.22	0.02	0.06	0.34	0.32
CG13773	2106907442	178	chn	Dict	0.5797				0.57	0.17	0.13	0.45	0.34	0.826	0.601	0.773	0.271	0.817	0.544	0.858	0.702	0.881	0.766	0.9439	0.141213	0.824	0.152	0.768	0.152	0.81	0.152	0.847	0.152	0.865	0.152	0.02	0.02	0.44	0.53	0.4	0.27	0.03	0.06	0.35	0.31
CG13773	2106907442	178	cv2	Dict	0.6678				0.56	0.49	0.08	0.38	0.25	0.87	0.685	0.828	0.295	0.86	0.6	0.893	0.763	0.898	0.844	0.5685	0.141213	0.859	0.152	0.814	0.152	0.85	0.152	0.878	0.152	0.914	0.152	0.31	0.35	0.38	0.43	0.3	0.25	0.13	0.11	0.62	0.59
CG13773	2106907442	178	dad	Dict	0.6812		*		0.6	0.35	0.36	0.11	0.33	0.869	0.651	0.825	0.301	0.858	0.591	0.884	0.743	0.901	0.864	0.3276	0.141213	0.857	0.152	0.812	0.152	0.849	0.152	0.877	0.152	0.897	0.152	0.02	0.03	0.18	0.36	0.74	0.69	0.29	0.21	0.1	0.04
CG13773	2106907442	178	dlp	Dict	0.6322		*		0.22	0.56	0.21	0.39	0.18	0.845	0.586	0.784	0.258	0.829	0.528	0.86	0.691	0.881	0.769	0.9958	0.141213	0.815	0.152	0.755	0.152	0.8	0.152	0.84	0.152	0.86	0.152	0.56	0.54	0.26	0.3	0.02	0.14	0.16	0.13	0.33	0.32
CG13773	2106907442	178	dpp	Dict	0.5328				0.44	0.75	0.19	0.01	0.02	0.891	0.7	0.852	0.316	0.883	0.644	0.907	0.794	0.913	0.856	0.4649	0.141213	0.891	0.152	0.853	0.152	0.884	0.152	0.902	0.152	0.92	0.152	0.58	0.59	0.35	0.4	0.49	0.42	0.15	0.2	0.22	0.21
CG13773	2106907442	178	inr	Dict	0.5912		*		0.32	0.49	0.12	0.08	0.29	0.794	0.561	0.744	0.24	0.782	0.496	0.807	0.653	0.838	0.701	0.5695	0.141213	0.795	0.152	0.731	0.152	0.778	0.152	0.824	0.152	0.855	0.152	0.33	0.36	0.37	0.42	0.41	0.3	0.06	0.11	0.09	0.12
CG13773	2106907442	178	kay	Dict	0.6307		*		0.28	0.64	0.08	0.07	0.3	0.825	0.609	0.772	0.243	0.814	0.538	0.851	0.678	0.862	0.785	0.4534	0.141213	0.821	0.152	0.767	0.152	0.806	0.152	0.839	0.152	0.857	0.152	0.47	0.49	0.19	0.23	0.32	0.32	0.18	0.13	0.28	0.24
CG13773	2106907442	178	luna	Dict	0.7022		*		0.18	0.75	0.2	0.38	0.08	0.869	0.647	0.82	0.292	0.86	0.599	0.88	0.733	0.882	0.805	0.3695	0.141213	0.861	0.152	0.819	0.152	0.852	0.152	0.879	0.152	0.903	0.152	0.62	0.62	0.08	0.12	0.38	0.41	0.28	0.2	0.3	0.25
CG13773	2106907442	178	med	Dict	0.6142				0.17	0.63	0.24	0.37	0.19	0.855	0.625	0.8	0.281	0.843	0.558	0.875	0.718	0.896	0.847	0.768	0.141213	0.84	0.152	0.789	0.152	0.828	0.152	0.862	0.152	0.893	0.152	0.54	0.51	0.21	0.19	0.24	0.32	0.14	0.06	0.15	0.1
CG13773	2106907442	178	mpk2	Dict	0.5655				0.18	0.68	0.09	0.37	0.15	0.846	0.633	0.806	0.278	0.839	0.57	0.862	0.742	0.889	0.829	0.4463	0.141213	0.849	0.152	0.797	0.152	0.837	0.152	0.878	0.152	0.903	0.152	0.61	0.59	0.05	0.06	0.23	0.26	0.05	0.09	0.59	0.58
CG13773	2106907442	178	os	Dict	0.6445		*		0.36	0.12	0.65	0.28	0	0.816	0.603	0.775	0.255	0.808	0.547	0.844	0.699	0.858	0.789	0.2858	0.141213	0.823	0.152	0.777	0.152	0.814	0.152	0.838	0.152	0.855	0.152	0.09	0.09	0.09	0.04	0.44	0.5	0.58	0.54	0.23	0.18
CG13773	2106907442	178	pnt	Dict	0.8299		**		0.28	0.69	0.03	0.39	0.09	0.858	0.653	0.816	0.281	0.853	0.584	0.873	0.772	0.886	0.829	0.9325	0.141213	0.843	0.152	0.802	0.152	0.836	0.152	0.865	0.152	0.891	0.152	0.52	0.53	0.21	0.26	0.4	0.37	0.11	0.04	0.34	0.29
CG13773	2106907442	178	sav	Dict	0.5396				0.34	0.81	0.01	0.18	0.13	0.914	0.732	0.873	0.328	0.904	0.656	0.928	0.795	0.931	0.931	0.5947	0.141213	0.909	0.152	0.868	0.152	0.902	0.152	0.929	0.152	0.952	0.152	0.58	0.56	0.05	0.15	0.59	0.59	0.16	0.23	0.3	0.28
CG13773	2106907442	178	ser	Dict	0.6886		*		0.11	0.78	0.3	0.27	0.16	0.893	0.688	0.842	0.31	0.879	0.621	0.905	0.793	0.918	0.869	0.4217	0.141213	0.876	0.152	0.833	0.152	0.868	0.152	0.891	0.152	0.919	0.152	0.69	0.66	0.2	0.16	0.36	0.45	0.2	0.11	0.1	0.06
CG13773	2106907442	178	shn	Dict	0.6154		*		0.07	0.42	0.09	0.6	0.08	0.789	0.552	0.733	0.222	0.78	0.475	0.812	0.651	0.824	0.737	0.7674	0.141213	0.779	0.152	0.71	0.152	0.762	0.152	0.81	0.152	0.865	0.152	0.35	0.37	0.05	0.03	0.05	0.08	0.21	0.19	0.46	0.41
CG13830	3218917244	878	brk	Dict	0.5139				0.23	0.77	0.25	0.5	0.11	0.919	0.718	0.886	0.323	0.914	0.651	0.937	0.802	0.946	0.885	2.1159	0.138576	0.925	0.152	0.883	0.152	0.916	0.152	0.939	0.152	0.957	0.152	0.69	0.71	0.37	0.36	0.24	0.17	0.03	0.08	0.36	0.33
CG13830	3218917244	878	btd	Dict	0.6645				0.83	0.17	0.22	0.01	0.09	0.891	0.703	0.854	0.334	0.882	0.638	0.904	0.803	0.91	0.863	0.5246	0.138576	0.889	0.152	0.851	0.152	0.882	0.152	0.899	0.152	0.921	0.152	0.06	0.02	0.53	0.66	0.51	0.36	0.14	0.16	0.45	0.44
CG13830	3218917244	878	chn	Dict	0.6492		*		0.57	0.17	0.13	0.45	0.34	0.826	0.601	0.773	0.271	0.817	0.544	0.858	0.702	0.881	0.766	0.9439	0.138576	0.824	0.152	0.768	0.152	0.81	0.152	0.847	0.152	0.865	0.152	0.02	0.02	0.44	0.53	0.4	0.27	0.03	0.06	0.35	0.31
CG13830	3218917244	878	cv2	Dict	0.6133				0.56	0.49	0.08	0.38	0.25	0.87	0.685	0.828	0.295	0.86	0.6	0.893	0.763	0.898	0.844	0.5685	0.138576	0.859	0.152	0.814	0.152	0.85	0.152	0.878	0.152	0.914	0.152	0.31	0.35	0.38	0.43	0.3	0.25	0.13	0.11	0.62	0.59
CG13830	3218917244	878	dad	Dict	0.6408				0.6	0.35	0.36	0.11	0.33	0.869	0.651	0.825	0.301	0.858	0.591	0.884	0.743	0.901	0.864	0.3276	0.138576	0.857	0.152	0.812	0.152	0.849	0.152	0.877	0.152	0.897	0.152	0.02	0.03	0.18	0.36	0.74	0.69	0.29	0.21	0.1	0.04
CG13830	3218917244	878	dally	Dict	0.6286				0.64	0.29	0.47	0.31	0.12	0.906	0.705	0.866	0.306	0.895	0.649	0.919	0.783	0.941	0.845	0.8955	0.138576	0.912	0.152	0.867	0.152	0.901	0.152	0.928	0.152	0.935	0.152	0.18	0.23	0.62	0.64	0.21	0.06	0.18	0.18	0.57	0.56
CG13830	3218917244	878	dpp	Dict	0.5163				0.44	0.75	0.19	0.01	0.02	0.891	0.7	0.852	0.316	0.883	0.644	0.907	0.794	0.913	0.856	0.4649	0.138576	0.891	0.152	0.853	0.152	0.884	0.152	0.902	0.152	0.92	0.152	0.58	0.59	0.35	0.4	0.49	0.42	0.15	0.2	0.22	0.21
CG13830	3218917244	878	emc	Dict	0.5452				0.54	0.06	0.44	0.37	0.03	0.797	0.601	0.752	0.255	0.791	0.535	0.833	0.683	0.848	0.776	0.3552	0.138576	0.815	0.152	0.761	0.152	0.801	0.152	0.836	0.152	0.867	0.152	0.15	0.08	0.65	0.67	0.07	0.11	0.07	0.06	0.31	0.3
CG13830	3218917244	878	fj	Dict	0.6451				0.84	0.35	0.16	0.16	0.06	0.938	0.763	0.909	0.355	0.932	0.705	0.952	0.857	0.956	0.929	2.0627	0.138576	0.928	0.152	0.894	0.152	0.921	0.152	0.941	0.152	0.953	0.152	0.59	0.54	0.46	0.61	0.39	0.27	0.29	0.29	0.37	0.34
CG13830	3218917244	878	inr	Dict	0.5569				0.32	0.49	0.12	0.08	0.29	0.794	0.561	0.744	0.24	0.782	0.496	0.807	0.653	0.838	0.701	0.5695	0.138576	0.795	0.152	0.731	0.152	0.778	0.152	0.824	0.152	0.855	0.152	0.33	0.36	0.37	0.42	0.41	0.3	0.06	0.11	0.09	0.12
CG13830	3218917244	878	mad	Dict	0.6815				0.84	0.08	0.2	0.2	0.07	0.894	0.724	0.866	0.359	0.887	0.661	0.91	0.811	0.922	0.847	0.5446	0.138576	0.889	0.152	0.854	0.152	0.881	0.152	0.901	0.152	0.907	0.152	0.2	0.16	0.38	0.54	0.57	0.49	0.28	0.25	0.5	0.46
CG13830	3218917244	878	mats	Dict	0.5482				0.58	0.58	0.2	0.15	0.19	0.892	0.685	0.853	0.318	0.882	0.628	0.899	0.766	0.9	0.866	3.5887	0.138576	0.884	0.152	0.843	0.152	0.875	0.152	0.897	0.152	0.918	0.152	0.72	0.65	0.54	0.62	0.07	0.12	0.01	0.04	0.07	0.04
CG13830	3218917244	878	sls	Dict	0.8008		**		0.72	0.33	0.05	0.14	0.22	0.84	0.68	0.801	0.314	0.832	0.622	0.857	0.744	0.874	0.801	0.5182	0.138576	0.839	0.152	0.799	0.152	0.832	0.152	0.859	0.152	0.883	0.152	0.03	0.07	0.46	0.61	0.64	0.52	0.12	0.06	0.21	0.16
CG13830	3218917244	878	socs36e	Dict	0.511				0.74	0.08	0.47	0.09	0.11	0.886	0.717	0.854	0.333	0.88	0.654	0.898	0.808	0.901	0.891	0.4292	0.138576	0.88	0.152	0.846	0.152	0.872	0.152	0.895	0.152	0.911	0.152	0.19	0.17	0.15	0.33	0.64	0.63	0.43	0.39	0.26	0.24
CG13830	3218917244	878	tai	Dict	0.6193				0.71	0.17	0.56	0.09	0.01	0.894	0.73	0.862	0.338	0.889	0.654	0.907	0.805	0.908	0.848	0.4654	0.138576	0.899	0.152	0.868	0.152	0.893	0.152	0.908	0.152	0.921	0.152	0	0.07	0.78	0.84	0.33	0.1	0.31	0.32	0.15	0.14
CG13830	3218917244	878	tango14	Dict	0.7675		*		0.87	0.17	0.08	0.09	0.3	0.899	0.736	0.871	0.356	0.894	0.669	0.914	0.821	0.916	0.86	1.4426	0.138576	0.909	0.152	0.875	0.152	0.902	0.152	0.923	0.152	0.932	0.152	0.16	0.13	0.48	0.67	0.77	0.62	0.08	0.02	0.09	0.05
CG13830	3218917244	878	trh	Dict	0.5147				0.53	0.15	0.11	0.12	0.43	0.775	0.527	0.711	0.231	0.758	0.467	0.81	0.62	0.815	0.708	0.8179	0.138576	0.778	0.152	0.714	0.152	0.764	0.152	0.808	0.152	0.854	0.152	0.09	0.08	0.37	0.52	0.61	0.45	0.21	0.27	0.06	0.09
CG13896	3100724845	524	ap	Dict	0.5814				0.13	0.81	0.11	0.15	0.22	0.856	0.666	0.815	0.299	0.847	0.607	0.87	0.745	0.871	0.826	0.394	0.396261	0.86	0.152	0.82	0.152	0.852	0.152	0.875	0.152	0.892	0.152	0.74	0.76	0.27	0.23	0.17	0.16	0.1	0.06	0.21	0.18
CG13896	3100719775	488	aret	Dict	0.5103				0.66	0.06	0.37	0.12	0	0.844	0.652	0.797	0.293	0.836	0.595	0.861	0.737	0.868	0.861	0.4688	0.147542	0.843	0.152	0.795	0.152	0.833	0.152	0.863	0.152	0.885	0.152	0.22	0.23	0.02	0.18	0.65	0.65	0.14	0.1	0.52	0.5
CG13896	3100724845	524	brk	Dict	0.5533				0.23	0.77	0.25	0.5	0.11	0.919	0.718	0.886	0.323	0.914	0.651	0.937	0.802	0.946	0.885	2.1159	0.396261	0.925	0.152	0.883	0.152	0.916	0.152	0.939	0.152	0.957	0.152	0.69	0.71	0.37	0.36	0.24	0.17	0.03	0.08	0.36	0.33
CG13896	3100724845	524	bx	Dict	0.7027				0.2	0.83	0.2	0.29	0.05	0.899	0.714	0.867	0.309	0.895	0.651	0.907	0.792	0.914	0.858	1.1999	0.396261	0.901	0.152	0.863	0.152	0.894	0.152	0.918	0.152	0.934	0.152	0.79	0.8	0.29	0.26	0.25	0.22	0.02	0.06	0.34	0.32
CG13896	3100724845	524	cyce	Dict	0.5319				0.06	0.47	0.74	0.25	0.09	0.906	0.718	0.874	0.309	0.899	0.652	0.925	0.798	0.928	0.888	0.9349	0.396261	0.901	0.152	0.857	0.152	0.891	0.152	0.92	0.152	0.936	0.152	0.46	0.5	0.47	0.39	0.06	0.21	0.54	0.55	0.2	0.19
CG13896	3100724845	524	dgo	Dict	0.5976				0.31	0.6	0.04	0.22	0.16	0.815	0.614	0.762	0.276	0.801	0.553	0.832	0.684	0.856	0.801	0.4284	0.396261	0.789	0.152	0.742	0.152	0.777	0.152	0.819	0.152	0.84	0.152	0.66	0.61	0.24	0.26	0.17	0.23	0.22	0.26	0.23	0.21
CG13896	3100724845	524	dlp	Dict	0.5719				0.22	0.56	0.21	0.39	0.18	0.845	0.586	0.784	0.258	0.829	0.528	0.86	0.691	0.881	0.769	0.9958	0.396261	0.815	0.152	0.755	0.152	0.8	0.152	0.84	0.152	0.86	0.152	0.56	0.54	0.26	0.3	0.02	0.14	0.16	0.13	0.33	0.32
CG13896	3100724845	524	dpp	Dict	0.5396				0.44	0.75	0.19	0.01	0.02	0.891	0.7	0.852	0.316	0.883	0.644	0.907	0.794	0.913	0.856	0.4649	0.396261	0.891	0.152	0.853	0.152	0.884	0.152	0.902	0.152	0.92	0.152	0.58	0.59	0.35	0.4	0.49	0.42	0.15	0.2	0.22	0.21
CG13896	3100724845	524	ds	Dict	0.7506				0.39	0.84	0.12	0.23	0.09	0.937	0.759	0.903	0.356	0.929	0.684	0.943	0.852	0.947	0.903	5.7655	0.396261	0.932	0.152	0.898	0.152	0.925	0.152	0.944	0.152	0.956	0.152	0.89	0.85	0.21	0.26	0.14	0.21	0.26	0.31	0.22	0.21
CG13896	3100724845	524	dsh	Dict	0.5912				0.68	0.51	0.24	0.14	0.1	0.91	0.72	0.873	0.33	0.9	0.649	0.92	0.793	0.934	0.84	1.1394	0.396261	0.91	0.152	0.871	0.152	0.9	0.152	0.923	0.152	0.937	0.152	0.68	0.66	0.19	0.35	0.33	0.27	0.26	0.26	0.32	0.3
CG13896	3100719775	488	egfr	Dict	0.5544				0.7	0.16	0.09	0.25	0.03	0.856	0.625	0.805	0.283	0.849	0.568	0.871	0.727	0.881	0.797	0.9394	0.147542	0.846	0.152	0.794	0.152	0.834	0.152	0.864	0.152	0.892	0.152	0.11	0.12	0.18	0.37	0.69	0.62	0.11	0.15	0.33	0.32
CG13896	3100724845	524	ex	Dict	0.7316		*		0.04	0.82	0.43	0.12	0.04	0.914	0.73	0.883	0.322	0.91	0.661	0.92	0.832	0.947	0.875	5.4462	0.396261	0.918	0.152	0.88	0.152	0.909	0.152	0.929	0.152	0.944	0.152	0.82	0.81	0.21	0.17	0.21	0.15	0.42	0.47	0.01	0.01
CG13896	3100724845	524	fj	Dict	0.5611				0.84	0.35	0.16	0.16	0.06	0.938	0.763	0.909	0.355	0.932	0.705	0.952	0.857	0.956	0.929	2.0627	0.396261	0.928	0.152	0.894	0.152	0.921	0.152	0.941	0.152	0.953	0.152	0.59	0.54	0.46	0.61	0.39	0.27	0.29	0.29	0.37	0.34
CG13896	3100724845	524	ft	Dict	0.6627				0.39	0.75	0.08	0.35	0.1	0.927	0.72	0.889	0.323	0.919	0.649	0.933	0.808	0.941	0.888	4.3023	0.396261	0.916	0.152	0.877	0.152	0.907	0.152	0.938	0.152	0.95	0.152	0.77	0.7	0.42	0.43	0.25	0.36	0.22	0.28	0.21	0.2
CG13896	3100724845	524	fz	Dict	0.7841		**		0.06	0.7	0.17	0.26	0.24	0.85	0.643	0.804	0.281	0.839	0.574	0.861	0.74	0.866	0.798	0.4509	0.396261	0.841	0.152	0.79	0.152	0.826	0.152	0.861	0.152	0.882	0.152	0.77	0.78	0.15	0.08	0.06	0.08	0.02	0.03	0.39	0.4
CG13896	3100724845	524	inv	Dict	0.5501		*		0.21	0.21	0.49	0.43	0.37	0.794	0.541	0.743	0.234	0.786	0.48	0.811	0.656	0.863	0.766	0.3255	0.396261	0.798	0.152	0.739	0.152	0.786	0.152	0.826	0.152	0.867	0.152	0.3	0.27	0.03	0.1	0.19	0.2	0.61	0.57	0.04	0.1
CG13896	3100719775	488	lea	Dict	0.5068		*		0.06	0.56	0.09	0.04	0.24	0.714	0.505	0.665	0.233	0.706	0.452	0.734	0.592	0.736	0.647	0.2912	0.147542	0.723	0.152	0.659	0.152	0.704	0.152	0.756	0.152	0.813	0.152	0.53	0.51	0.06	0.06	0.18	0.24	0.1	0.06	0.28	0.28
CG13896	3100724845	524	mats	Dict	0.6115				0.58	0.58	0.2	0.15	0.19	0.892	0.685	0.853	0.318	0.882	0.628	0.899	0.766	0.9	0.866	3.5887	0.396261	0.884	0.152	0.843	0.152	0.875	0.152	0.897	0.152	0.918	0.152	0.72	0.65	0.54	0.62	0.07	0.12	0.01	0.04	0.07	0.04
CG13896	3100724845	524	mpk2	Dict	0.5964				0.18	0.68	0.09	0.37	0.15	0.846	0.633	0.806	0.278	0.839	0.57	0.862	0.742	0.889	0.829	0.4463	0.396261	0.849	0.152	0.797	0.152	0.837	0.152	0.878	0.152	0.903	0.152	0.61	0.59	0.05	0.06	0.23	0.26	0.05	0.09	0.59	0.58
CG13896	3100724845	524	nmo	Dict	0.8507		**		0.31	0.81	0.35	0.29	0.15	0.94	0.734	0.907	0.346	0.934	0.656	0.96	0.831	0.961	0.909	2.0873	0.396261	0.938	0.152	0.902	0.152	0.931	0.152	0.953	0.152	0.963	0.152	0.92	0.92	0.07	0.06	0.16	0.13	0.17	0.2	0.2	0.2
CG13896	3100724845	524	ptc	Dict	0.6389		*		0.6	0.19	0.19	0.05	0.47	0.847	0.608	0.783	0.28	0.832	0.556	0.855	0.7	0.862	0.784	1.9546	0.396261	0.831	0.152	0.769	0.152	0.813	0.152	0.863	0.152	0.884	0.152	0.46	0.46	0.19	0.39	0.58	0.48	0.06	0.01	0.05	0.01
CG13896	3100719775	488	sav	Dict	0.5541				0.34	0.81	0.01	0.18	0.13	0.914	0.732	0.873	0.328	0.904	0.656	0.928	0.795	0.931	0.931	0.5947	0.147542	0.909	0.152	0.868	0.152	0.902	0.152	0.929	0.152	0.952	0.152	0.58	0.56	0.05	0.15	0.59	0.59	0.16	0.23	0.3	0.28
CG13896	3100724845	524	sav	Dict	0.5202				0.34	0.81	0.01	0.18	0.13	0.914	0.732	0.873	0.328	0.904	0.656	0.928	0.795	0.931	0.931	0.5947	0.396261	0.909	0.152	0.868	0.152	0.902	0.152	0.929	0.152	0.952	0.152	0.58	0.56	0.05	0.15	0.59	0.59	0.16	0.23	0.3	0.28
CG13896	3100719775	488	socs36e	Dict	0.5571				0.74	0.08	0.47	0.09	0.11	0.886	0.717	0.854	0.333	0.88	0.654	0.898	0.808	0.901	0.891	0.4292	0.147542	0.88	0.152	0.846	0.152	0.872	0.152	0.895	0.152	0.911	0.152	0.19	0.17	0.15	0.33	0.64	0.63	0.43	0.39	0.26	0.24
CG13896	3100719775	488	sog	Dict	0.5716				0.53	0.17	0.36	0.18	0.04	0.794	0.601	0.737	0.279	0.78	0.545	0.816	0.693	0.827	0.806	0.8503	0.147542	0.793	0.152	0.735	0.152	0.778	0.152	0.817	0.152	0.858	0.152	0.13	0.17	0.18	0.03	0.7	0.73	0.04	0.09	0.43	0.41
CG13896	3100724845	524	spi	Dict	0.623		*		0.23	0.37	0.57	0.11	0.37	0.827	0.601	0.778	0.242	0.821	0.54	0.837	0.698	0.84	0.809	0.4719	0.396261	0.83	0.152	0.779	0.152	0.818	0.152	0.856	0.152	0.893	0.152	0.4	0.43	0.43	0.36	0.07	0.16	0.33	0.31	0.43	0.45
CG13896	3100724845	524	stan	Dict	0.5009				0.2	0.44	0.52	0.16	0.03	0.797	0.577	0.744	0.261	0.787	0.515	0.815	0.663	0.834	0.797	0.2999	0.396261	0.795	0.152	0.741	0.152	0.785	0.152	0.827	0.152	0.875	0.152	0.48	0.46	0.11	0.04	0.08	0.12	0.49	0.5	0.04	0.02
CG13896	3100724845	524	stg	Dict	0.6076				0.25	0.54	0.35	0.48	0.09	0.864	0.657	0.816	0.263	0.854	0.585	0.882	0.756	0.884	0.858	1.0297	0.396261	0.866	0.152	0.81	0.152	0.852	0.152	0.889	0.152	0.914	0.152	0.63	0.59	0.01	0.07	0.07	0.06	0.41	0.44	0.37	0.33
CG13896	3100724845	524	tmod	Dict	0.5071				0.2	0.49	0.1	0.6	0.13	0.821	0.592	0.765	0.243	0.814	0.518	0.84	0.668	0.868	0.753	0.6584	0.396261	0.822	0.152	0.761	0.152	0.81	0.152	0.852	0.152	0.876	0.152	0.57	0.56	0.02	0.09	0.05	0.01	0.01	0.04	0.36	0.34
CG13896	3100724845	524	tx	Dict	0.7922		*		0.06	0.74	0.53	0.01	0.18	0.914	0.73	0.868	0.33	0.9	0.655	0.928	0.801	0.928	0.839	0.9684	0.396261	0.903	0.152	0.866	0.152	0.895	0.152	0.917	0.152	0.929	0.152	0.74	0.75	0.23	0.15	0.01	0.04	0.43	0.45	0.19	0.2
CG13896	3100724845	524	vn	Dict	0.5944		*		0.07	0.55	0.02	0.2	0.09	0.774	0.525	0.715	0.229	0.762	0.472	0.814	0.609	0.817	0.672	1.2207	0.396261	0.762	0.152	0.696	0.152	0.746	0.152	0.799	0.152	0.855	0.152	0.46	0.41	0.22	0.15	0.38	0.43	0.37	0.4	0.27	0.29
CG13896	3100724845	524	wg	Dict	0.5207				0.35	0.58	0.01	0.12	0.19	0.778	0.575	0.724	0.25	0.762	0.522	0.796	0.661	0.804	0.737	1.6659	0.396261	0.776	0.152	0.726	0.152	0.764	0.152	0.798	0.152	0.846	0.152	0.62	0.59	0.24	0.31	0.06	0.04	0.13	0.15	0.18	0.17
CG13896	3100724845	524	wts	Dict	0.8215		**		0.36	0.69	0.38	0.08	0.22	0.894	0.718	0.857	0.324	0.886	0.645	0.917	0.809	0.926	0.882	0.9344	0.396261	0.887	0.152	0.845	0.152	0.877	0.152	0.901	0.152	0.918	0.152	0.79	0.77	0.09	0.2	0.16	0.12	0.41	0.42	0.22	0.24
CG13955	2205307482	320	aret	Dict	0.6042				0.66	0.06	0.37	0.12	0	0.844	0.652	0.797	0.293	0.836	0.595	0.861	0.737	0.868	0.861	0.4688	0.403945	0.843	0.152	0.795	0.152	0.833	0.152	0.863	0.152	0.885	0.152	0.22	0.23	0.02	0.18	0.65	0.65	0.14	0.1	0.52	0.5
CG13955	2205307482	320	cyce	Dict	0.67				0.06	0.47	0.74	0.25	0.09	0.906	0.718	0.874	0.309	0.899	0.652	0.925	0.798	0.928	0.888	0.9349	0.403945	0.901	0.152	0.857	0.152	0.891	0.152	0.92	0.152	0.936	0.152	0.46	0.5	0.47	0.39	0.06	0.21	0.54	0.55	0.2	0.19
CG13955	2205307482	320	dad	Dict	0.5072				0.6	0.35	0.36	0.11	0.33	0.869	0.651	0.825	0.301	0.858	0.591	0.884	0.743	0.901	0.864	0.3276	0.403945	0.857	0.152	0.812	0.152	0.849	0.152	0.877	0.152	0.897	0.152	0.02	0.03	0.18	0.36	0.74	0.69	0.29	0.21	0.1	0.04
CG13955	2205307482	320	dsh	Dict	0.546				0.68	0.51	0.24	0.14	0.1	0.91	0.72	0.873	0.33	0.9	0.649	0.92	0.793	0.934	0.84	1.1394	0.403945	0.91	0.152	0.871	0.152	0.9	0.152	0.923	0.152	0.937	0.152	0.68	0.66	0.19	0.35	0.33	0.27	0.26	0.26	0.32	0.3
CG13955	2205307482	320	fj	Dict	0.5389				0.84	0.35	0.16	0.16	0.06	0.938	0.763	0.909	0.355	0.932	0.705	0.952	0.857	0.956	0.929	2.0627	0.403945	0.928	0.152	0.894	0.152	0.921	0.152	0.941	0.152	0.953	0.152	0.59	0.54	0.46	0.61	0.39	0.27	0.29	0.29	0.37	0.34
CG13955	2205307482	320	mad	Dict	0.5115				0.84	0.08	0.2	0.2	0.07	0.894	0.724	0.866	0.359	0.887	0.661	0.91	0.811	0.922	0.847	0.5446	0.403945	0.889	0.152	0.854	0.152	0.881	0.152	0.901	0.152	0.907	0.152	0.2	0.16	0.38	0.54	0.57	0.49	0.28	0.25	0.5	0.46
CG13955	2205307482	320	mer	Dict	0.5204				0.55	0.22	0.26	0.44	0.25	0.801	0.584	0.747	0.252	0.783	0.511	0.832	0.672	0.836	0.714	0.5311	0.403945	0.805	0.152	0.756	0.152	0.794	0.152	0.829	0.152	0.878	0.152	0.03	0.03	0.1	0.25	0.57	0.55	0.11	0.08	0.08	0.08
CG13955	2205307482	320	nmo	Dict	0.5562				0.31	0.81	0.35	0.29	0.15	0.94	0.734	0.907	0.346	0.934	0.656	0.96	0.831	0.961	0.909	2.0873	0.403945	0.938	0.152	0.902	0.152	0.931	0.152	0.953	0.152	0.963	0.152	0.92	0.92	0.07	0.06	0.16	0.13	0.17	0.2	0.2	0.2
CG13955	2205307482	320	os	Dict	0.6279		*		0.36	0.12	0.65	0.28	0	0.816	0.603	0.775	0.255	0.808	0.547	0.844	0.699	0.858	0.789	0.2858	0.403945	0.823	0.152	0.777	0.152	0.814	0.152	0.838	0.152	0.855	0.152	0.09	0.09	0.09	0.04	0.44	0.5	0.58	0.54	0.23	0.18
CG13955	2205307482	320	rpt1	Dict	0.5294				0.04	0.25	0.66	0.15	0.07	0.793	0.555	0.721	0.245	0.77	0.503	0.816	0.623	0.817	0.725	0.264	0.403945	0.775	0.152	0.72	0.152	0.763	0.152	0.791	0.152	0.839	0.152	0.12	0.08	0.45	0.35	0.32	0.47	0.36	0.32	0.25	0.23
CG13955	2205307482	320	socs36e	Dict	0.785		*		0.74	0.08	0.47	0.09	0.11	0.886	0.717	0.854	0.333	0.88	0.654	0.898	0.808	0.901	0.891	0.4292	0.403945	0.88	0.152	0.846	0.152	0.872	0.152	0.895	0.152	0.911	0.152	0.19	0.17	0.15	0.33	0.64	0.63	0.43	0.39	0.26	0.24
CG13955	2205307482	320	sog	Dict	0.5356				0.53	0.17	0.36	0.18	0.04	0.794	0.601	0.737	0.279	0.78	0.545	0.816	0.693	0.827	0.806	0.8503	0.403945	0.793	0.152	0.735	0.152	0.778	0.152	0.817	0.152	0.858	0.152	0.13	0.17	0.18	0.03	0.7	0.73	0.04	0.09	0.43	0.41
CG13955	2205307482	320	stan	Dict	0.5978		*		0.2	0.44	0.52	0.16	0.03	0.797	0.577	0.744	0.261	0.787	0.515	0.815	0.663	0.834	0.797	0.2999	0.403945	0.795	0.152	0.741	0.152	0.785	0.152	0.827	0.152	0.875	0.152	0.48	0.46	0.11	0.04	0.08	0.12	0.49	0.5	0.04	0.02
CG13955	2205307482	320	tx	Dict	0.5049				0.06	0.74	0.53	0.01	0.18	0.914	0.73	0.868	0.33	0.9	0.655	0.928	0.801	0.928	0.839	0.9684	0.403945	0.903	0.152	0.866	0.152	0.895	0.152	0.917	0.152	0.929	0.152	0.74	0.75	0.23	0.15	0.01	0.04	0.43	0.45	0.19	0.2
CG13955	2205307482	320	wts	Dict	0.5854				0.36	0.69	0.38	0.08	0.22	0.894	0.718	0.857	0.324	0.886	0.645	0.917	0.809	0.926	0.882	0.9344	0.403945	0.887	0.152	0.845	0.152	0.877	0.152	0.901	0.152	0.918	0.152	0.79	0.77	0.09	0.2	0.16	0.12	0.41	0.42	0.22	0.24
CG14153	3110636971	611	bs	Dict	0.5241		*		0.13	0.12	0.59	0.11	0.19	0.743	0.496	0.681	0.214	0.727	0.45	0.75	0.598	0.783	0.667	0.4761	0.199336	0.731	0.152	0.674	0.152	0.719	0.152	0.753	0.152	0.785	0.152	0.05	0.08	0.32	0.29	0.1	0.22	0.53	0.5	0.19	0.2
CG14153	3110636971	611	cg4267	Dict	0.5582				0.34	0.23	0.51	0.34	0.33	0.814	0.59	0.77	0.242	0.807	0.53	0.854	0.675	0.854	0.806	0.4521	0.199336	0.81	0.152	0.754	0.152	0.798	0.152	0.83	0.152	0.853	0.152	0.19	0.23	0.4	0.37	0.06	0.15	0.31	0.28	0.66	0.66
CG14153	3110636971	611	ct	Muta	0.519				0.54	0.02	0.38	0.03	0.09	0.705	0.538	0.664	0.253	0.701	0.484	0.718	0.607	0.733	0.65	0.0056	0.199336	0.715	0.152	0.672	0.152	0.705	0.152	0.731	0.152	0.766	0.152	0.12	0.08	0.47	0.51	0.18	0.03	0.25	0.22	0.25	0.27
CG14153	3110636971	611	dally	Dict	0.5593				0.64	0.29	0.47	0.31	0.12	0.906	0.705	0.866	0.306	0.895	0.649	0.919	0.783	0.941	0.845	0.8955	0.199336	0.912	0.152	0.867	0.152	0.901	0.152	0.928	0.152	0.935	0.152	0.18	0.23	0.62	0.64	0.21	0.06	0.18	0.18	0.57	0.56
CG14153	3110636971	611	inv	Dict	0.5377				0.21	0.21	0.49	0.43	0.37	0.794	0.541	0.743	0.234	0.786	0.48	0.811	0.656	0.863	0.766	0.3255	0.199336	0.798	0.152	0.739	0.152	0.786	0.152	0.826	0.152	0.867	0.152	0.3	0.27	0.03	0.1	0.19	0.2	0.61	0.57	0.04	0.1
CG14153	3110636971	611	med	Dict	0.5024				0.17	0.63	0.24	0.37	0.19	0.855	0.625	0.8	0.281	0.843	0.558	0.875	0.718	0.896	0.847	0.768	0.199336	0.84	0.152	0.789	0.152	0.828	0.152	0.862	0.152	0.893	0.152	0.54	0.51	0.21	0.19	0.24	0.32	0.14	0.06	0.15	0.1
CG14153	3110636971	611	porin2	Dict	0.5322		*		0.33	0.08	0.08	0.17	0.4	0.707	0.432	0.629	0.171	0.692	0.385	0.758	0.534	0.768	0.592	0.3654	0.199336	0.705	0.152	0.622	0.152	0.684	0.152	0.734	0.152	0.798	0.152	0.18	0.18	0.05	0.09	0.03	0.03	0.12	0.09	0.4	0.42
CG14153	3110636971	611	s6k	Dict	0.6414		*		0.41	0.16	0.42	0.15	0.43	0.797	0.575	0.75	0.247	0.785	0.514	0.818	0.673	0.836	0.777	0.3905	0.199336	0.79	0.152	0.728	0.152	0.774	0.152	0.814	0.152	0.852	0.152	0.22	0.16	0.48	0.46	0.17	0.29	0.14	0.09	0.47	0.48
CG14153	3110636971	611	spi	Dict	0.6089		*		0.23	0.37	0.57	0.11	0.37	0.827	0.601	0.778	0.242	0.821	0.54	0.837	0.698	0.84	0.809	0.4719	0.199336	0.83	0.152	0.779	0.152	0.818	0.152	0.856	0.152	0.893	0.152	0.4	0.43	0.43	0.36	0.07	0.16	0.33	0.31	0.43	0.45
CG14221	1019513552	101	aret	Dict	0.6503				0.66	0.06	0.37	0.12	0	0.844	0.652	0.797	0.293	0.836	0.595	0.861	0.737	0.868	0.861	0.4688	0.121788	0.843	0.152	0.795	0.152	0.833	0.152	0.863	0.152	0.885	0.152	0.22	0.23	0.02	0.18	0.65	0.65	0.14	0.1	0.52	0.5
CG14221	1019513630	101	aret	Dict	0.5641				0.66	0.06	0.37	0.12	0	0.844	0.652	0.797	0.293	0.836	0.595	0.861	0.737	0.868	0.861	0.4688	0.0259491	0.843	0.152	0.795	0.152	0.833	0.152	0.863	0.152	0.885	0.152	0.22	0.23	0.02	0.18	0.65	0.65	0.14	0.1	0.52	0.5
CG14221	1019513552	101	btd	Dict	0.7743		*		0.83	0.17	0.22	0.01	0.09	0.891	0.703	0.854	0.334	0.882	0.638	0.904	0.803	0.91	0.863	0.5246	0.121788	0.889	0.152	0.851	0.152	0.882	0.152	0.899	0.152	0.921	0.152	0.06	0.02	0.53	0.66	0.51	0.36	0.14	0.16	0.45	0.44
CG14221	1019513630	101	btd	Dict	0.6829				0.83	0.17	0.22	0.01	0.09	0.891	0.703	0.854	0.334	0.882	0.638	0.904	0.803	0.91	0.863	0.5246	0.0259491	0.889	0.152	0.851	0.152	0.882	0.152	0.899	0.152	0.921	0.152	0.06	0.02	0.53	0.66	0.51	0.36	0.14	0.16	0.45	0.44
CG14221	1019513552	101	cg14147	Dict	0.5125				0.55	0.18	0.24	0.12	0.04	0.733	0.54	0.685	0.256	0.721	0.496	0.752	0.618	0.76	0.693	0.3374	0.121788	0.737	0.152	0.68	0.152	0.721	0.152	0.759	0.152	0.801	0.152	0.38	0.37	0.21	0.34	0.32	0.21	0.4	0.39	0.38	0.38
CG14221	1019513552	101	cg8654	Dict	0.6518		**		0.63	0.1	0.2	0.08	0.1	0.738	0.574	0.696	0.263	0.73	0.517	0.775	0.637	0.797	0.705	0.4142	0.121788	0.749	0.152	0.7	0.152	0.738	0.152	0.77	0.152	0.818	0.152	0.14	0.12	0.15	0.3	0.49	0.46	0.09	0.08	0.45	0.44
CG14221	1019513630	101	cg8654	Dict	0.5194				0.63	0.1	0.2	0.08	0.1	0.738	0.574	0.696	0.263	0.73	0.517	0.775	0.637	0.797	0.705	0.4142	0.0259491	0.749	0.152	0.7	0.152	0.738	0.152	0.77	0.152	0.818	0.152	0.14	0.12	0.15	0.3	0.49	0.46	0.09	0.08	0.45	0.44
CG14221	1019513552	101	cv2	Dict	0.6106				0.56	0.49	0.08	0.38	0.25	0.87	0.685	0.828	0.295	0.86	0.6	0.893	0.763	0.898	0.844	0.5685	0.121788	0.859	0.152	0.814	0.152	0.85	0.152	0.878	0.152	0.914	0.152	0.31	0.35	0.38	0.43	0.3	0.25	0.13	0.11	0.62	0.59
CG14221	1019513630	101	cv2	Dict	0.6036				0.56	0.49	0.08	0.38	0.25	0.87	0.685	0.828	0.295	0.86	0.6	0.893	0.763	0.898	0.844	0.5685	0.0259491	0.859	0.152	0.814	0.152	0.85	0.152	0.878	0.152	0.914	0.152	0.31	0.35	0.38	0.43	0.3	0.25	0.13	0.11	0.62	0.59
CG14221	1019513552	101	dally	Dict	0.604				0.64	0.29	0.47	0.31	0.12	0.906	0.705	0.866	0.306	0.895	0.649	0.919	0.783	0.941	0.845	0.8955	0.121788	0.912	0.152	0.867	0.152	0.901	0.152	0.928	0.152	0.935	0.152	0.18	0.23	0.62	0.64	0.21	0.06	0.18	0.18	0.57	0.56
CG14221	1019513630	101	dally	Dict	0.5406				0.64	0.29	0.47	0.31	0.12	0.906	0.705	0.866	0.306	0.895	0.649	0.919	0.783	0.941	0.845	0.8955	0.0259491	0.912	0.152	0.867	0.152	0.901	0.152	0.928	0.152	0.935	0.152	0.18	0.23	0.62	0.64	0.21	0.06	0.18	0.18	0.57	0.56
CG14221	1019513630	101	dll	Dict	0.6548				0.22	0.84	0.07	0.09	0.13	0.893	0.691	0.855	0.319	0.882	0.626	0.902	0.775	0.916	0.881	0.8412	0.0259491	0.894	0.152	0.854	0.152	0.885	0.152	0.911	0.152	0.924	0.152	0.68	0.66	0.07	0.15	0.59	0.59	0.03	0.11	0.06	0.04
CG14221	1019513630	101	dpp	Dict	0.6375				0.44	0.75	0.19	0.01	0.02	0.891	0.7	0.852	0.316	0.883	0.644	0.907	0.794	0.913	0.856	0.4649	0.0259491	0.891	0.152	0.853	0.152	0.884	0.152	0.902	0.152	0.92	0.152	0.58	0.59	0.35	0.4	0.49	0.42	0.15	0.2	0.22	0.21
CG14221	1019513552	101	dsh	Dict	0.6627				0.68	0.51	0.24	0.14	0.1	0.91	0.72	0.873	0.33	0.9	0.649	0.92	0.793	0.934	0.84	1.1394	0.121788	0.91	0.152	0.871	0.152	0.9	0.152	0.923	0.152	0.937	0.152	0.68	0.66	0.19	0.35	0.33	0.27	0.26	0.26	0.32	0.3
CG14221	1019513630	101	egfr	Dict	0.7703		**		0.7	0.16	0.09	0.25	0.03	0.856	0.625	0.805	0.283	0.849	0.568	0.871	0.727	0.881	0.797	0.9394	0.0259491	0.846	0.152	0.794	0.152	0.834	0.152	0.864	0.152	0.892	0.152	0.11	0.12	0.18	0.37	0.69	0.62	0.11	0.15	0.33	0.32
CG14221	1019513552	101	egfr	Dict	0.7445		**		0.7	0.16	0.09	0.25	0.03	0.856	0.625	0.805	0.283	0.849	0.568	0.871	0.727	0.881	0.797	0.9394	0.121788	0.846	0.152	0.794	0.152	0.834	0.152	0.864	0.152	0.892	0.152	0.11	0.12	0.18	0.37	0.69	0.62	0.11	0.15	0.33	0.32
CG14221	1019513552	101	fj	Dict	0.7802		*		0.84	0.35	0.16	0.16	0.06	0.938	0.763	0.909	0.355	0.932	0.705	0.952	0.857	0.956	0.929	2.0627	0.121788	0.928	0.152	0.894	0.152	0.921	0.152	0.941	0.152	0.953	0.152	0.59	0.54	0.46	0.61	0.39	0.27	0.29	0.29	0.37	0.34
CG14221	1019513552	101	kn	Dict	0.6325				0.64	0.28	0.11	0.11	0.28	0.824	0.637	0.777	0.296	0.81	0.565	0.844	0.703	0.867	0.779	0.3931	0.121788	0.815	0.152	0.763	0.152	0.803	0.152	0.833	0.152	0.858	0.152	0.43	0.39	0.35	0.43	0.14	0.05	0.01	0.04	0.51	0.51
CG14221	1019513552	101	mad	Dict	0.809		*		0.84	0.08	0.2	0.2	0.07	0.894	0.724	0.866	0.359	0.887	0.661	0.91	0.811	0.922	0.847	0.5446	0.121788	0.889	0.152	0.854	0.152	0.881	0.152	0.901	0.152	0.907	0.152	0.2	0.16	0.38	0.54	0.57	0.49	0.28	0.25	0.5	0.46
CG14221	1019513630	101	mad	Dict	0.6854				0.84	0.08	0.2	0.2	0.07	0.894	0.724	0.866	0.359	0.887	0.661	0.91	0.811	0.922	0.847	0.5446	0.0259491	0.889	0.152	0.854	0.152	0.881	0.152	0.901	0.152	0.907	0.152	0.2	0.16	0.38	0.54	0.57	0.49	0.28	0.25	0.5	0.46
CG14221	1019513630	101	mer	Dict	0.6446		*		0.55	0.22	0.26	0.44	0.25	0.801	0.584	0.747	0.252	0.783	0.511	0.832	0.672	0.836	0.714	0.5311	0.0259491	0.805	0.152	0.756	0.152	0.794	0.152	0.829	0.152	0.878	0.152	0.03	0.03	0.1	0.25	0.57	0.55	0.11	0.08	0.08	0.08
CG14221	1019513552	101	mer	Dict	0.6315		*		0.55	0.22	0.26	0.44	0.25	0.801	0.584	0.747	0.252	0.783	0.511	0.832	0.672	0.836	0.714	0.5311	0.121788	0.805	0.152	0.756	0.152	0.794	0.152	0.829	0.152	0.878	0.152	0.03	0.03	0.1	0.25	0.57	0.55	0.11	0.08	0.08	0.08
CG14221	1019513630	101	mpk2	Dict	0.5652				0.18	0.68	0.09	0.37	0.15	0.846	0.633	0.806	0.278	0.839	0.57	0.862	0.742	0.889	0.829	0.4463	0.0259491	0.849	0.152	0.797	0.152	0.837	0.152	0.878	0.152	0.903	0.152	0.61	0.59	0.05	0.06	0.23	0.26	0.05	0.09	0.59	0.58
CG14221	1019513630	101	poc1	Dict	0.5341				0.34	0.49	0.08	0.28	0.08	0.801	0.576	0.742	0.257	0.791	0.523	0.832	0.664	0.843	0.724	0.4028	0.0259491	0.795	0.152	0.734	0.152	0.78	0.152	0.824	0.152	0.87	0.152	0.31	0.29	0.02	0.07	0.38	0.38	0.25	0.29	0.69	0.68
CG14221	1019513630	101	rho	Dict	0.6809		*		0.42	0.64	0.27	0.24	0.06	0.883	0.676	0.842	0.302	0.873	0.632	0.896	0.784	0.901	0.867	0.6139	0.0259491	0.882	0.152	0.835	0.152	0.87	0.152	0.895	0.152	0.913	0.152	0.45	0.44	0.28	0.37	0.56	0.47	0.39	0.44	0.18	0.17
CG14221	1019513630	101	sav	Dict	0.7541		*		0.34	0.81	0.01	0.18	0.13	0.914	0.732	0.873	0.328	0.904	0.656	0.928	0.795	0.931	0.931	0.5947	0.0259491	0.909	0.152	0.868	0.152	0.902	0.152	0.929	0.152	0.952	0.152	0.58	0.56	0.05	0.15	0.59	0.59	0.16	0.23	0.3	0.28
CG14221	1019513630	101	sgg	Dict	0.5993				0.51	0.37	0.25	0.17	0.44	0.862	0.625	0.799	0.263	0.848	0.576	0.881	0.727	0.9	0.823	1.7731	0.0259491	0.841	0.152	0.783	0.152	0.828	0.152	0.862	0.152	0.907	0.152	0.21	0.23	0.29	0.34	0.24	0.18	0.23	0.22	0.74	0.74
CG14221	1019513552	101	sgg	Dict	0.5785				0.51	0.37	0.25	0.17	0.44	0.862	0.625	0.799	0.263	0.848	0.576	0.881	0.727	0.9	0.823	1.7731	0.121788	0.841	0.152	0.783	0.152	0.828	0.152	0.862	0.152	0.907	0.152	0.21	0.23	0.29	0.34	0.24	0.18	0.23	0.22	0.74	0.74
CG14221	1019513552	101	sls	Dict	0.6207				0.72	0.33	0.05	0.14	0.22	0.84	0.68	0.801	0.314	0.832	0.622	0.857	0.744	0.874	0.801	0.5182	0.121788	0.839	0.152	0.799	0.152	0.832	0.152	0.859	0.152	0.883	0.152	0.03	0.07	0.46	0.61	0.64	0.52	0.12	0.06	0.21	0.16
CG14221	1019513630	101	sls	Dict	0.6174				0.72	0.33	0.05	0.14	0.22	0.84	0.68	0.801	0.314	0.832	0.622	0.857	0.744	0.874	0.801	0.5182	0.0259491	0.839	0.152	0.799	0.152	0.832	0.152	0.859	0.152	0.883	0.152	0.03	0.07	0.46	0.61	0.64	0.52	0.12	0.06	0.21	0.16
CG14221	1019513552	101	socs36e	Dict	0.764		*		0.74	0.08	0.47	0.09	0.11	0.886	0.717	0.854	0.333	0.88	0.654	0.898	0.808	0.901	0.891	0.4292	0.121788	0.88	0.152	0.846	0.152	0.872	0.152	0.895	0.152	0.911	0.152	0.19	0.17	0.15	0.33	0.64	0.63	0.43	0.39	0.26	0.24
CG14221	1019513630	101	socs36e	Dict	0.6915				0.74	0.08	0.47	0.09	0.11	0.886	0.717	0.854	0.333	0.88	0.654	0.898	0.808	0.901	0.891	0.4292	0.0259491	0.88	0.152	0.846	0.152	0.872	0.152	0.895	0.152	0.911	0.152	0.19	0.17	0.15	0.33	0.64	0.63	0.43	0.39	0.26	0.24
CG14221	1019513630	101	sog	Dict	0.6458		*		0.53	0.17	0.36	0.18	0.04	0.794	0.601	0.737	0.279	0.78	0.545	0.816	0.693	0.827	0.806	0.8503	0.0259491	0.793	0.152	0.735	0.152	0.778	0.152	0.817	0.152	0.858	0.152	0.13	0.17	0.18	0.03	0.7	0.73	0.04	0.09	0.43	0.41
CG14221	1019513552	101	sog	Dict	0.6088		*		0.53	0.17	0.36	0.18	0.04	0.794	0.601	0.737	0.279	0.78	0.545	0.816	0.693	0.827	0.806	0.8503	0.121788	0.793	0.152	0.735	0.152	0.778	0.152	0.817	0.152	0.858	0.152	0.13	0.17	0.18	0.03	0.7	0.73	0.04	0.09	0.43	0.41
CG14221	1019513552	101	tai	Dict	0.5077				0.71	0.17	0.56	0.09	0.01	0.894	0.73	0.862	0.338	0.889	0.654	0.907	0.805	0.908	0.848	0.4654	0.121788	0.899	0.152	0.868	0.152	0.893	0.152	0.908	0.152	0.921	0.152	0	0.07	0.78	0.84	0.33	0.1	0.31	0.32	0.15	0.14
CG14221	1019513552	101	tango14	Dict	0.7197				0.87	0.17	0.08	0.09	0.3	0.899	0.736	0.871	0.356	0.894	0.669	0.914	0.821	0.916	0.86	1.4426	0.121788	0.909	0.152	0.875	0.152	0.902	0.152	0.923	0.152	0.932	0.152	0.16	0.13	0.48	0.67	0.77	0.62	0.08	0.02	0.09	0.05
CG14221	1019513630	101	tango14	Dict	0.6609				0.87	0.17	0.08	0.09	0.3	0.899	0.736	0.871	0.356	0.894	0.669	0.914	0.821	0.916	0.86	1.4426	0.0259491	0.909	0.152	0.875	0.152	0.902	0.152	0.923	0.152	0.932	0.152	0.16	0.13	0.48	0.67	0.77	0.62	0.08	0.02	0.09	0.05
CG14314	3214042988	834	inv	Dict	0.5944		*		0.21	0.21	0.49	0.43	0.37	0.794	0.541	0.743	0.234	0.786	0.48	0.811	0.656	0.863	0.766	0.3255	0.282125	0.798	0.152	0.739	0.152	0.786	0.152	0.826	0.152	0.867	0.152	0.3	0.27	0.03	0.1	0.19	0.2	0.61	0.57	0.04	0.1
CG14314	3214042988	834	med	Dict	0.5956				0.17	0.63	0.24	0.37	0.19	0.855	0.625	0.8	0.281	0.843	0.558	0.875	0.718	0.896	0.847	0.768	0.282125	0.84	0.152	0.789	0.152	0.828	0.152	0.862	0.152	0.893	0.152	0.54	0.51	0.21	0.19	0.24	0.32	0.14	0.06	0.15	0.1
CG14314	3214042988	834	os	Dict	0.6				0.36	0.12	0.65	0.28	0	0.816	0.603	0.775	0.255	0.808	0.547	0.844	0.699	0.858	0.789	0.2858	0.282125	0.823	0.152	0.777	0.152	0.814	0.152	0.838	0.152	0.855	0.152	0.09	0.09	0.09	0.04	0.44	0.5	0.58	0.54	0.23	0.18
CG14314	3214042988	834	rpt1	Dict	0.5358				0.04	0.25	0.66	0.15	0.07	0.793	0.555	0.721	0.245	0.77	0.503	0.816	0.623	0.817	0.725	0.264	0.282125	0.775	0.152	0.72	0.152	0.763	0.152	0.791	0.152	0.839	0.152	0.12	0.08	0.45	0.35	0.32	0.47	0.36	0.32	0.25	0.23
CG14314	3214042988	834	ser	Dict	0.5954				0.11	0.78	0.3	0.27	0.16	0.893	0.688	0.842	0.31	0.879	0.621	0.905	0.793	0.918	0.869	0.4217	0.282125	0.876	0.152	0.833	0.152	0.868	0.152	0.891	0.152	0.919	0.152	0.69	0.66	0.2	0.16	0.36	0.45	0.2	0.11	0.1	0.06
CG14314	3214042988	834	spi	Dict	0.516				0.23	0.37	0.57	0.11	0.37	0.827	0.601	0.778	0.242	0.821	0.54	0.837	0.698	0.84	0.809	0.4719	0.282125	0.83	0.152	0.779	0.152	0.818	0.152	0.856	0.152	0.893	0.152	0.4	0.43	0.43	0.36	0.07	0.16	0.33	0.31	0.43	0.45
CG14314	3214042988	834	tai	Dict	0.5151				0.71	0.17	0.56	0.09	0.01	0.894	0.73	0.862	0.338	0.889	0.654	0.907	0.805	0.908	0.848	0.4654	0.282125	0.899	0.152	0.868	0.152	0.893	0.152	0.908	0.152	0.921	0.152	0	0.07	0.78	0.84	0.33	0.1	0.31	0.32	0.15	0.14
CG14314	3214042988	834	ubx	Dict	0.659				0.45	0.7	0.38	0.06	0.15	0.916	0.737	0.881	0.325	0.908	0.669	0.924	0.823	0.952	0.891	0.6049	0.282125	0.91	0.152	0.876	0.152	0.902	0.152	0.929	0.152	0.943	0.152	0.74	0.7	0.38	0.42	0.12	0.27	0.29	0.22	0.23	0.25
CG14414	1014475574	75	ap	Dict	0.5395				0.13	0.81	0.11	0.15	0.22	0.856	0.666	0.815	0.299	0.847	0.607	0.87	0.745	0.871	0.826	0.394	0.470295	0.86	0.152	0.82	0.152	0.852	0.152	0.875	0.152	0.892	0.152	0.74	0.76	0.27	0.23	0.17	0.16	0.1	0.06	0.21	0.18
CG14414	1014474722	75	btd	Dict	0.6271				0.83	0.17	0.22	0.01	0.09	0.891	0.703	0.854	0.334	0.882	0.638	0.904	0.803	0.91	0.863	0.5246	0.380312	0.889	0.152	0.851	0.152	0.882	0.152	0.899	0.152	0.921	0.152	0.06	0.02	0.53	0.66	0.51	0.36	0.14	0.16	0.45	0.44
CG14414	1014474722	75	cg14147	Dict	0.6186		**		0.55	0.18	0.24	0.12	0.04	0.733	0.54	0.685	0.256	0.721	0.496	0.752	0.618	0.76	0.693	0.3374	0.380312	0.737	0.152	0.68	0.152	0.721	0.152	0.759	0.152	0.801	0.152	0.38	0.37	0.21	0.34	0.32	0.21	0.4	0.39	0.38	0.38
CG14414	1014475467	75	cg14147	Dict	0.591		*		0.55	0.18	0.24	0.12	0.04	0.733	0.54	0.685	0.256	0.721	0.496	0.752	0.618	0.76	0.693	0.3374	0.0854448	0.737	0.152	0.68	0.152	0.721	0.152	0.759	0.152	0.801	0.152	0.38	0.37	0.21	0.34	0.32	0.21	0.4	0.39	0.38	0.38
CG14414	1014474722	75	cg34394	Dict	0.5475		*		0.47	0.1	0.1	0.25	0.48	0.803	0.521	0.728	0.219	0.777	0.464	0.823	0.611	0.862	0.716	2.1385	0.380312	0.804	0.152	0.728	0.152	0.785	0.152	0.843	0.152	0.876	0.152	0.11	0.08	0.38	0.51	0.58	0.42	0.19	0.24	0.3	0.32
CG14414	1014474722	75	ct	Muta	0.5852		*		0.54	0.02	0.38	0.03	0.09	0.705	0.538	0.664	0.253	0.701	0.484	0.718	0.607	0.733	0.65	0.0056	0.380312	0.715	0.152	0.672	0.152	0.705	0.152	0.731	0.152	0.766	0.152	0.12	0.08	0.47	0.51	0.18	0.03	0.25	0.22	0.25	0.27
CG14414	1014475467	75	ct	Muta	0.5014				0.54	0.02	0.38	0.03	0.09	0.705	0.538	0.664	0.253	0.701	0.484	0.718	0.607	0.733	0.65	0.0056	0.0854448	0.715	0.152	0.672	0.152	0.705	0.152	0.731	0.152	0.766	0.152	0.12	0.08	0.47	0.51	0.18	0.03	0.25	0.22	0.25	0.27
CG14414	1014474722	75	dally	Dict	0.5053				0.64	0.29	0.47	0.31	0.12	0.906	0.705	0.866	0.306	0.895	0.649	0.919	0.783	0.941	0.845	0.8955	0.380312	0.912	0.152	0.867	0.152	0.901	0.152	0.928	0.152	0.935	0.152	0.18	0.23	0.62	0.64	0.21	0.06	0.18	0.18	0.57	0.56
CG14414	1014475574	75	dgo	Dict	0.6444		*		0.31	0.6	0.04	0.22	0.16	0.815	0.614	0.762	0.276	0.801	0.553	0.832	0.684	0.856	0.801	0.4284	0.470295	0.789	0.152	0.742	0.152	0.777	0.152	0.819	0.152	0.84	0.152	0.66	0.61	0.24	0.26	0.17	0.23	0.22	0.26	0.23	0.21
CG14414	1014475574	75	dll	Dict	0.562				0.22	0.84	0.07	0.09	0.13	0.893	0.691	0.855	0.319	0.882	0.626	0.902	0.775	0.916	0.881	0.8412	0.470295	0.894	0.152	0.854	0.152	0.885	0.152	0.911	0.152	0.924	0.152	0.68	0.66	0.07	0.15	0.59	0.59	0.03	0.11	0.06	0.04
CG14414	1014475467	75	dlp	Dict	0.5047				0.22	0.56	0.21	0.39	0.18	0.845	0.586	0.784	0.258	0.829	0.528	0.86	0.691	0.881	0.769	0.9958	0.0854448	0.815	0.152	0.755	0.152	0.8	0.152	0.84	0.152	0.86	0.152	0.56	0.54	0.26	0.3	0.02	0.14	0.16	0.13	0.33	0.32
CG14414	1014475574	75	ds	Dict	0.8084		*		0.39	0.84	0.12	0.23	0.09	0.937	0.759	0.903	0.356	0.929	0.684	0.943	0.852	0.947	0.903	5.7655	0.470295	0.932	0.152	0.898	0.152	0.925	0.152	0.944	0.152	0.956	0.152	0.89	0.85	0.21	0.26	0.14	0.21	0.26	0.31	0.22	0.21
CG14414	1014475467	75	ds	Dict	0.552				0.39	0.84	0.12	0.23	0.09	0.937	0.759	0.903	0.356	0.929	0.684	0.943	0.852	0.947	0.903	5.7655	0.0854448	0.932	0.152	0.898	0.152	0.925	0.152	0.944	0.152	0.956	0.152	0.89	0.85	0.21	0.26	0.14	0.21	0.26	0.31	0.22	0.21
CG14414	1014475574	75	dsh	Dict	0.6705				0.68	0.51	0.24	0.14	0.1	0.91	0.72	0.873	0.33	0.9	0.649	0.92	0.793	0.934	0.84	1.1394	0.470295	0.91	0.152	0.871	0.152	0.9	0.152	0.923	0.152	0.937	0.152	0.68	0.66	0.19	0.35	0.33	0.27	0.26	0.26	0.32	0.3
CG14414	1014475467	75	dsh	Dict	0.5382				0.68	0.51	0.24	0.14	0.1	0.91	0.72	0.873	0.33	0.9	0.649	0.92	0.793	0.934	0.84	1.1394	0.0854448	0.91	0.152	0.871	0.152	0.9	0.152	0.923	0.152	0.937	0.152	0.68	0.66	0.19	0.35	0.33	0.27	0.26	0.26	0.32	0.3
CG14414	1014475467	75	emc	Dict	0.5671				0.54	0.06	0.44	0.37	0.03	0.797	0.601	0.752	0.255	0.791	0.535	0.833	0.683	0.848	0.776	0.3552	0.0854448	0.815	0.152	0.761	0.152	0.801	0.152	0.836	0.152	0.867	0.152	0.15	0.08	0.65	0.67	0.07	0.11	0.07	0.06	0.31	0.3
CG14414	1014474722	75	emc	Dict	0.5593				0.54	0.06	0.44	0.37	0.03	0.797	0.601	0.752	0.255	0.791	0.535	0.833	0.683	0.848	0.776	0.3552	0.380312	0.815	0.152	0.761	0.152	0.801	0.152	0.836	0.152	0.867	0.152	0.15	0.08	0.65	0.67	0.07	0.11	0.07	0.06	0.31	0.3
CG14414	1014475574	75	ex	Dict	0.5687				0.04	0.82	0.43	0.12	0.04	0.914	0.73	0.883	0.322	0.91	0.661	0.92	0.832	0.947	0.875	5.4462	0.470295	0.918	0.152	0.88	0.152	0.909	0.152	0.929	0.152	0.944	0.152	0.82	0.81	0.21	0.17	0.21	0.15	0.42	0.47	0.01	0.01
CG14414	1014475574	75	fj	Dict	0.6328				0.84	0.35	0.16	0.16	0.06	0.938	0.763	0.909	0.355	0.932	0.705	0.952	0.857	0.956	0.929	2.0627	0.470295	0.928	0.152	0.894	0.152	0.921	0.152	0.941	0.152	0.953	0.152	0.59	0.54	0.46	0.61	0.39	0.27	0.29	0.29	0.37	0.34
CG14414	1014474722	75	fj	Dict	0.5191				0.84	0.35	0.16	0.16	0.06	0.938	0.763	0.909	0.355	0.932	0.705	0.952	0.857	0.956	0.929	2.0627	0.380312	0.928	0.152	0.894	0.152	0.921	0.152	0.941	0.152	0.953	0.152	0.59	0.54	0.46	0.61	0.39	0.27	0.29	0.29	0.37	0.34
CG14414	1014475574	75	ft	Dict	0.7803		*		0.39	0.75	0.08	0.35	0.1	0.927	0.72	0.889	0.323	0.919	0.649	0.933	0.808	0.941	0.888	4.3023	0.470295	0.916	0.152	0.877	0.152	0.907	0.152	0.938	0.152	0.95	0.152	0.77	0.7	0.42	0.43	0.25	0.36	0.22	0.28	0.21	0.2
CG14414	1014475467	75	ft	Dict	0.584				0.39	0.75	0.08	0.35	0.1	0.927	0.72	0.889	0.323	0.919	0.649	0.933	0.808	0.941	0.888	4.3023	0.0854448	0.916	0.152	0.877	0.152	0.907	0.152	0.938	0.152	0.95	0.152	0.77	0.7	0.42	0.43	0.25	0.36	0.22	0.28	0.21	0.2
CG14414	1014475574	75	fz	Dict	0.5148				0.06	0.7	0.17	0.26	0.24	0.85	0.643	0.804	0.281	0.839	0.574	0.861	0.74	0.866	0.798	0.4509	0.470295	0.841	0.152	0.79	0.152	0.826	0.152	0.861	0.152	0.882	0.152	0.77	0.78	0.15	0.08	0.06	0.08	0.02	0.03	0.39	0.4
CG14414	1014475467	75	kn	Dict	0.5283				0.64	0.28	0.11	0.11	0.28	0.824	0.637	0.777	0.296	0.81	0.565	0.844	0.703	0.867	0.779	0.3931	0.0854448	0.815	0.152	0.763	0.152	0.803	0.152	0.833	0.152	0.858	0.152	0.43	0.39	0.35	0.43	0.14	0.05	0.01	0.04	0.51	0.51
CG14414	1014475574	75	lea	Dict	0.5024				0.06	0.56	0.09	0.04	0.24	0.714	0.505	0.665	0.233	0.706	0.452	0.734	0.592	0.736	0.647	0.2912	0.470295	0.723	0.152	0.659	0.152	0.704	0.152	0.756	0.152	0.813	0.152	0.53	0.51	0.06	0.06	0.18	0.24	0.1	0.06	0.28	0.28
CG14414	1014475574	75	mats	Dict	0.8431		**		0.58	0.58	0.2	0.15	0.19	0.892	0.685	0.853	0.318	0.882	0.628	0.899	0.766	0.9	0.866	3.5887	0.470295	0.884	0.152	0.843	0.152	0.875	0.152	0.897	0.152	0.918	0.152	0.72	0.65	0.54	0.62	0.07	0.12	0.01	0.04	0.07	0.04
CG14414	1014475467	75	mats	Dict	0.7316		*		0.58	0.58	0.2	0.15	0.19	0.892	0.685	0.853	0.318	0.882	0.628	0.899	0.766	0.9	0.866	3.5887	0.0854448	0.884	0.152	0.843	0.152	0.875	0.152	0.897	0.152	0.918	0.152	0.72	0.65	0.54	0.62	0.07	0.12	0.01	0.04	0.07	0.04
CG14414	1014474722	75	mats	Dict	0.6676				0.58	0.58	0.2	0.15	0.19	0.892	0.685	0.853	0.318	0.882	0.628	0.899	0.766	0.9	0.866	3.5887	0.380312	0.884	0.152	0.843	0.152	0.875	0.152	0.897	0.152	0.918	0.152	0.72	0.65	0.54	0.62	0.07	0.12	0.01	0.04	0.07	0.04
CG14414	1014475574	75	nmo	Dict	0.707				0.31	0.81	0.35	0.29	0.15	0.94	0.734	0.907	0.346	0.934	0.656	0.96	0.831	0.961	0.909	2.0873	0.470295	0.938	0.152	0.902	0.152	0.931	0.152	0.953	0.152	0.963	0.152	0.92	0.92	0.07	0.06	0.16	0.13	0.17	0.2	0.2	0.2
CG14414	1014475467	75	rpt1	Dict	0.5066				0.04	0.25	0.66	0.15	0.07	0.793	0.555	0.721	0.245	0.77	0.503	0.816	0.623	0.817	0.725	0.264	0.0854448	0.775	0.152	0.72	0.152	0.763	0.152	0.791	0.152	0.839	0.152	0.12	0.08	0.45	0.35	0.32	0.47	0.36	0.32	0.25	0.23
CG14414	1014475467	75	s6k	Dict	0.5105				0.41	0.16	0.42	0.15	0.43	0.797	0.575	0.75	0.247	0.785	0.514	0.818	0.673	0.836	0.777	0.3905	0.0854448	0.79	0.152	0.728	0.152	0.774	0.152	0.814	0.152	0.852	0.152	0.22	0.16	0.48	0.46	0.17	0.29	0.14	0.09	0.47	0.48
CG14414	1014475574	75	sav	Dict	0.5003				0.34	0.81	0.01	0.18	0.13	0.914	0.732	0.873	0.328	0.904	0.656	0.928	0.795	0.931	0.931	0.5947	0.470295	0.909	0.152	0.868	0.152	0.902	0.152	0.929	0.152	0.952	0.152	0.58	0.56	0.05	0.15	0.59	0.59	0.16	0.23	0.3	0.28
CG14414	1014475574	75	sd	Dict	0.7888		**		0.34	0.63	0.37	0.24	0.02	0.856	0.667	0.823	0.286	0.851	0.597	0.87	0.767	0.871	0.849	5.3633	0.470295	0.87	0.152	0.824	0.152	0.861	0.152	0.885	0.152	0.905	0.152	0.7	0.64	0.42	0.45	0.08	0.25	0.3	0.25	0.11	0.09
CG14414	1014475467	75	sd	Dict	0.7451		*		0.34	0.63	0.37	0.24	0.02	0.856	0.667	0.823	0.286	0.851	0.597	0.87	0.767	0.871	0.849	5.3633	0.0854448	0.87	0.152	0.824	0.152	0.861	0.152	0.885	0.152	0.905	0.152	0.7	0.64	0.42	0.45	0.08	0.25	0.3	0.25	0.11	0.09
CG14414	1014474722	75	sd	Dict	0.7154		*		0.34	0.63	0.37	0.24	0.02	0.856	0.667	0.823	0.286	0.851	0.597	0.87	0.767	0.871	0.849	5.3633	0.380312	0.87	0.152	0.824	0.152	0.861	0.152	0.885	0.152	0.905	0.152	0.7	0.64	0.42	0.45	0.08	0.25	0.3	0.25	0.11	0.09
CG14414	1014475574	75	ser	Dict	0.5819				0.11	0.78	0.3	0.27	0.16	0.893	0.688	0.842	0.31	0.879	0.621	0.905	0.793	0.918	0.869	0.4217	0.470295	0.876	0.152	0.833	0.152	0.868	0.152	0.891	0.152	0.919	0.152	0.69	0.66	0.2	0.16	0.36	0.45	0.2	0.11	0.1	0.06
CG14414	1014475467	75	ser	Dict	0.5656				0.11	0.78	0.3	0.27	0.16	0.893	0.688	0.842	0.31	0.879	0.621	0.905	0.793	0.918	0.869	0.4217	0.0854448	0.876	0.152	0.833	0.152	0.868	0.152	0.891	0.152	0.919	0.152	0.69	0.66	0.2	0.16	0.36	0.45	0.2	0.11	0.1	0.06
CG14414	1014474722	75	tai	Dict	0.7639		*		0.71	0.17	0.56	0.09	0.01	0.894	0.73	0.862	0.338	0.889	0.654	0.907	0.805	0.908	0.848	0.4654	0.380312	0.899	0.152	0.868	0.152	0.893	0.152	0.908	0.152	0.921	0.152	0	0.07	0.78	0.84	0.33	0.1	0.31	0.32	0.15	0.14
CG14414	1014475467	75	tai	Dict	0.5743				0.71	0.17	0.56	0.09	0.01	0.894	0.73	0.862	0.338	0.889	0.654	0.907	0.805	0.908	0.848	0.4654	0.0854448	0.899	0.152	0.868	0.152	0.893	0.152	0.908	0.152	0.921	0.152	0	0.07	0.78	0.84	0.33	0.1	0.31	0.32	0.15	0.14
CG14414	1014474722	75	tango14	Dict	0.557				0.87	0.17	0.08	0.09	0.3	0.899	0.736	0.871	0.356	0.894	0.669	0.914	0.821	0.916	0.86	1.4426	0.380312	0.909	0.152	0.875	0.152	0.902	0.152	0.923	0.152	0.932	0.152	0.16	0.13	0.48	0.67	0.77	0.62	0.08	0.02	0.09	0.05
CG14414	1014474722	75	trh	Dict	0.5254				0.53	0.15	0.11	0.12	0.43	0.775	0.527	0.711	0.231	0.758	0.467	0.81	0.62	0.815	0.708	0.8179	0.380312	0.778	0.152	0.714	0.152	0.764	0.152	0.808	0.152	0.854	0.152	0.09	0.08	0.37	0.52	0.61	0.45	0.21	0.27	0.06	0.09
CG14414	1014475467	75	ubx	Dict	0.7674		*		0.45	0.7	0.38	0.06	0.15	0.916	0.737	0.881	0.325	0.908	0.669	0.924	0.823	0.952	0.891	0.6049	0.0854448	0.91	0.152	0.876	0.152	0.902	0.152	0.929	0.152	0.943	0.152	0.74	0.7	0.38	0.42	0.12	0.27	0.29	0.22	0.23	0.25
CG14414	1014474722	75	ubx	Dict	0.7099				0.45	0.7	0.38	0.06	0.15	0.916	0.737	0.881	0.325	0.908	0.669	0.924	0.823	0.952	0.891	0.6049	0.380312	0.91	0.152	0.876	0.152	0.902	0.152	0.929	0.152	0.943	0.152	0.74	0.7	0.38	0.42	0.12	0.27	0.29	0.22	0.23	0.25
CG14414	1014475574	75	ubx	Dict	0.7035				0.45	0.7	0.38	0.06	0.15	0.916	0.737	0.881	0.325	0.908	0.669	0.924	0.823	0.952	0.891	0.6049	0.470295	0.91	0.152	0.876	0.152	0.902	0.152	0.929	0.152	0.943	0.152	0.74	0.7	0.38	0.42	0.12	0.27	0.29	0.22	0.23	0.25
CG14414	1014475574	75	wg	Dict	0.6416		*		0.35	0.58	0.01	0.12	0.19	0.778	0.575	0.724	0.25	0.762	0.522	0.796	0.661	0.804	0.737	1.6659	0.470295	0.776	0.152	0.726	0.152	0.764	0.152	0.798	0.152	0.846	0.152	0.62	0.59	0.24	0.31	0.06	0.04	0.13	0.15	0.18	0.17
CG14414	1014475467	75	wg	Dict	0.5191				0.35	0.58	0.01	0.12	0.19	0.778	0.575	0.724	0.25	0.762	0.522	0.796	0.661	0.804	0.737	1.6659	0.0854448	0.776	0.152	0.726	0.152	0.764	0.152	0.798	0.152	0.846	0.152	0.62	0.59	0.24	0.31	0.06	0.04	0.13	0.15	0.18	0.17
CG14414	1014475574	75	wts	Dict	0.6826				0.36	0.69	0.38	0.08	0.22	0.894	0.718	0.857	0.324	0.886	0.645	0.917	0.809	0.926	0.882	0.9344	0.470295	0.887	0.152	0.845	0.152	0.877	0.152	0.901	0.152	0.918	0.152	0.79	0.77	0.09	0.2	0.16	0.12	0.41	0.42	0.22	0.24
CG14414	1014475467	75	yki	Dict	0.563		*		0.25	0.37	0.29	0.38	0.05	0.708	0.492	0.653	0.208	0.693	0.424	0.741	0.58	0.745	0.684	1.8695	0.0854448	0.696	0.152	0.646	0.152	0.684	0.152	0.734	0.152	0.761	0.152	0.39	0.36	0.27	0.29	0	0.11	0.27	0.24	0.18	0.15
CG14414	1014475574	75	yki	Dict	0.5454		*		0.25	0.37	0.29	0.38	0.05	0.708	0.492	0.653	0.208	0.693	0.424	0.741	0.58	0.745	0.684	1.8695	0.470295	0.696	0.152	0.646	0.152	0.684	0.152	0.734	0.152	0.761	0.152	0.39	0.36	0.27	0.29	0	0.11	0.27	0.24	0.18	0.15
CG14414	1014474722	75	yki	Dict	0.5383		*		0.25	0.37	0.29	0.38	0.05	0.708	0.492	0.653	0.208	0.693	0.424	0.741	0.58	0.745	0.684	1.8695	0.380312	0.696	0.152	0.646	0.152	0.684	0.152	0.734	0.152	0.761	0.152	0.39	0.36	0.27	0.29	0	0.11	0.27	0.24	0.18	0.15
CG14457	3122654995	734	ap	Dict	0.5715				0.13	0.81	0.11	0.15	0.22	0.856	0.666	0.815	0.299	0.847	0.607	0.87	0.745	0.871	0.826	0.394	0.208817	0.86	0.152	0.82	0.152	0.852	0.152	0.875	0.152	0.892	0.152	0.74	0.76	0.27	0.23	0.17	0.16	0.1	0.06	0.21	0.18
CG14457	3122654995	734	bx	Dict	0.5226				0.2	0.83	0.2	0.29	0.05	0.899	0.714	0.867	0.309	0.895	0.651	0.907	0.792	0.914	0.858	1.1999	0.208817	0.901	0.152	0.863	0.152	0.894	0.152	0.918	0.152	0.934	0.152	0.79	0.8	0.29	0.26	0.25	0.22	0.02	0.06	0.34	0.32
CG14457	3122654995	734	dlp	Dict	0.5723				0.22	0.56	0.21	0.39	0.18	0.845	0.586	0.784	0.258	0.829	0.528	0.86	0.691	0.881	0.769	0.9958	0.208817	0.815	0.152	0.755	0.152	0.8	0.152	0.84	0.152	0.86	0.152	0.56	0.54	0.26	0.3	0.02	0.14	0.16	0.13	0.33	0.32
CG14457	3122654995	734	fz	Dict	0.6232				0.06	0.7	0.17	0.26	0.24	0.85	0.643	0.804	0.281	0.839	0.574	0.861	0.74	0.866	0.798	0.4509	0.208817	0.841	0.152	0.79	0.152	0.826	0.152	0.861	0.152	0.882	0.152	0.77	0.78	0.15	0.08	0.06	0.08	0.02	0.03	0.39	0.4
CG14457	3122654995	734	kay	Dict	0.5697				0.28	0.64	0.08	0.07	0.3	0.825	0.609	0.772	0.243	0.814	0.538	0.851	0.678	0.862	0.785	0.4534	0.208817	0.821	0.152	0.767	0.152	0.806	0.152	0.839	0.152	0.857	0.152	0.47	0.49	0.19	0.23	0.32	0.32	0.18	0.13	0.28	0.24
CG14457	3122654995	734	mpk2	Dict	0.5263				0.18	0.68	0.09	0.37	0.15	0.846	0.633	0.806	0.278	0.839	0.57	0.862	0.742	0.889	0.829	0.4463	0.208817	0.849	0.152	0.797	0.152	0.837	0.152	0.878	0.152	0.903	0.152	0.61	0.59	0.05	0.06	0.23	0.26	0.05	0.09	0.59	0.58
CG14457	3122654995	734	nmo	Dict	0.542				0.31	0.81	0.35	0.29	0.15	0.94	0.734	0.907	0.346	0.934	0.656	0.96	0.831	0.961	0.909	2.0873	0.208817	0.938	0.152	0.902	0.152	0.931	0.152	0.953	0.152	0.963	0.152	0.92	0.92	0.07	0.06	0.16	0.13	0.17	0.2	0.2	0.2
CG14457	3122654995	734	poc1	Dict	0.5064				0.34	0.49	0.08	0.28	0.08	0.801	0.576	0.742	0.257	0.791	0.523	0.832	0.664	0.843	0.724	0.4028	0.208817	0.795	0.152	0.734	0.152	0.78	0.152	0.824	0.152	0.87	0.152	0.31	0.29	0.02	0.07	0.38	0.38	0.25	0.29	0.69	0.68
CG14457	3122654995	734	sav	Dict	0.6593				0.34	0.81	0.01	0.18	0.13	0.914	0.732	0.873	0.328	0.904	0.656	0.928	0.795	0.931	0.931	0.5947	0.208817	0.909	0.152	0.868	0.152	0.902	0.152	0.929	0.152	0.952	0.152	0.58	0.56	0.05	0.15	0.59	0.59	0.16	0.23	0.3	0.28
CG14457	3122654995	734	sgg	Dict	0.6229				0.51	0.37	0.25	0.17	0.44	0.862	0.625	0.799	0.263	0.848	0.576	0.881	0.727	0.9	0.823	1.7731	0.208817	0.841	0.152	0.783	0.152	0.828	0.152	0.862	0.152	0.907	0.152	0.21	0.23	0.29	0.34	0.24	0.18	0.23	0.22	0.74	0.74
CG14457	3122654995	734	tx	Dict	0.5823				0.06	0.74	0.53	0.01	0.18	0.914	0.73	0.868	0.33	0.9	0.655	0.928	0.801	0.928	0.839	0.9684	0.208817	0.903	0.152	0.866	0.152	0.895	0.152	0.917	0.152	0.929	0.152	0.74	0.75	0.23	0.15	0.01	0.04	0.43	0.45	0.19	0.2
CG14457	3122654995	734	vn	Dict	0.6179		**		0.07	0.55	0.02	0.2	0.09	0.774	0.525	0.715	0.229	0.762	0.472	0.814	0.609	0.817	0.672	1.2207	0.208817	0.762	0.152	0.696	0.152	0.746	0.152	0.799	0.152	0.855	0.152	0.46	0.41	0.22	0.15	0.38	0.43	0.37	0.4	0.27	0.29
CG14457	3122654995	734	wg	Dict	0.5363				0.35	0.58	0.01	0.12	0.19	0.778	0.575	0.724	0.25	0.762	0.522	0.796	0.661	0.804	0.737	1.6659	0.208817	0.776	0.152	0.726	0.152	0.764	0.152	0.798	0.152	0.846	0.152	0.62	0.59	0.24	0.31	0.06	0.04	0.13	0.15	0.18	0.17
CG14457	3122654995	734	wts	Dict	0.6059				0.36	0.69	0.38	0.08	0.22	0.894	0.718	0.857	0.324	0.886	0.645	0.917	0.809	0.926	0.882	0.9344	0.208817	0.887	0.152	0.845	0.152	0.877	0.152	0.901	0.152	0.918	0.152	0.79	0.77	0.09	0.2	0.16	0.12	0.41	0.42	0.22	0.24
CG14459	3122604769	733	bsk	Dict	0.5124				0.12	0.05	0.62	0.23	0.07	0.742	0.522	0.689	0.218	0.733	0.458	0.75	0.61	0.791	0.715	0.6289	0.155725	0.771	0.152	0.715	0.152	0.759	0.152	0.802	0.152	0.862	0.152	0.22	0.28	0.54	0.4	0.36	0.51	0.22	0.19	0.51	0.49
CG14459	3122604769	733	dlp	Dict	0.5646				0.22	0.56	0.21	0.39	0.18	0.845	0.586	0.784	0.258	0.829	0.528	0.86	0.691	0.881	0.769	0.9958	0.155725	0.815	0.152	0.755	0.152	0.8	0.152	0.84	0.152	0.86	0.152	0.56	0.54	0.26	0.3	0.02	0.14	0.16	0.13	0.33	0.32
CG14459	3122604769	733	kni	Dict	0.5184				0.08	0.39	0.31	0.54	0.03	0.798	0.528	0.732	0.217	0.778	0.462	0.84	0.638	0.859	0.778	0.3592	0.155725	0.808	0.152	0.738	0.152	0.795	0.152	0.832	0.152	0.852	0.152	0.34	0.32	0.13	0.12	0.16	0.25	0.41	0.36	0.44	0.41
CG14459	3122604769	733	os	Dict	0.5261				0.36	0.12	0.65	0.28	0	0.816	0.603	0.775	0.255	0.808	0.547	0.844	0.699	0.858	0.789	0.2858	0.155725	0.823	0.152	0.777	0.152	0.814	0.152	0.838	0.152	0.855	0.152	0.09	0.09	0.09	0.04	0.44	0.5	0.58	0.54	0.23	0.18
CG14459	3122604769	733	rpt1	Dict	0.6117		*		0.04	0.25	0.66	0.15	0.07	0.793	0.555	0.721	0.245	0.77	0.503	0.816	0.623	0.817	0.725	0.264	0.155725	0.775	0.152	0.72	0.152	0.763	0.152	0.791	0.152	0.839	0.152	0.12	0.08	0.45	0.35	0.32	0.47	0.36	0.32	0.25	0.23
CG14459	3122604769	733	sd	Dict	0.5951				0.34	0.63	0.37	0.24	0.02	0.856	0.667	0.823	0.286	0.851	0.597	0.87	0.767	0.871	0.849	5.3633	0.155725	0.87	0.152	0.824	0.152	0.861	0.152	0.885	0.152	0.905	0.152	0.7	0.64	0.42	0.45	0.08	0.25	0.3	0.25	0.11	0.09
CG14464	2200744865	302	ap	Dict	0.5943				0.13	0.81	0.11	0.15	0.22	0.856	0.666	0.815	0.299	0.847	0.607	0.87	0.745	0.871	0.826	0.394	0.0600754	0.86	0.152	0.82	0.152	0.852	0.152	0.875	0.152	0.892	0.152	0.74	0.76	0.27	0.23	0.17	0.16	0.1	0.06	0.21	0.18
CG14464	2200744865	302	brk	Dict	0.649				0.23	0.77	0.25	0.5	0.11	0.919	0.718	0.886	0.323	0.914	0.651	0.937	0.802	0.946	0.885	2.1159	0.0600754	0.925	0.152	0.883	0.152	0.916	0.152	0.939	0.152	0.957	0.152	0.69	0.71	0.37	0.36	0.24	0.17	0.03	0.08	0.36	0.33
CG14464	2200744865	302	btd	Dict	0.6423				0.83	0.17	0.22	0.01	0.09	0.891	0.703	0.854	0.334	0.882	0.638	0.904	0.803	0.91	0.863	0.5246	0.0600754	0.889	0.152	0.851	0.152	0.882	0.152	0.899	0.152	0.921	0.152	0.06	0.02	0.53	0.66	0.51	0.36	0.14	0.16	0.45	0.44
CG14464	2200744865	302	bx	Dict	0.7126				0.2	0.83	0.2	0.29	0.05	0.899	0.714	0.867	0.309	0.895	0.651	0.907	0.792	0.914	0.858	1.1999	0.0600754	0.901	0.152	0.863	0.152	0.894	0.152	0.918	0.152	0.934	0.152	0.79	0.8	0.29	0.26	0.25	0.22	0.02	0.06	0.34	0.32
CG14464	2200744865	302	cg4267	Dict	0.5939		*		0.34	0.23	0.51	0.34	0.33	0.814	0.59	0.77	0.242	0.807	0.53	0.854	0.675	0.854	0.806	0.4521	0.0600754	0.81	0.152	0.754	0.152	0.798	0.152	0.83	0.152	0.853	0.152	0.19	0.23	0.4	0.37	0.06	0.15	0.31	0.28	0.66	0.66
CG14464	2200744865	302	cv2	Dict	0.6004				0.56	0.49	0.08	0.38	0.25	0.87	0.685	0.828	0.295	0.86	0.6	0.893	0.763	0.898	0.844	0.5685	0.0600754	0.859	0.152	0.814	0.152	0.85	0.152	0.878	0.152	0.914	0.152	0.31	0.35	0.38	0.43	0.3	0.25	0.13	0.11	0.62	0.59
CG14464	2200744865	302	cyce	Dict	0.5655				0.06	0.47	0.74	0.25	0.09	0.906	0.718	0.874	0.309	0.899	0.652	0.925	0.798	0.928	0.888	0.9349	0.0600754	0.901	0.152	0.857	0.152	0.891	0.152	0.92	0.152	0.936	0.152	0.46	0.5	0.47	0.39	0.06	0.21	0.54	0.55	0.2	0.19
CG14464	2200744865	302	dally	Dict	0.7705		*		0.64	0.29	0.47	0.31	0.12	0.906	0.705	0.866	0.306	0.895	0.649	0.919	0.783	0.941	0.845	0.8955	0.0600754	0.912	0.152	0.867	0.152	0.901	0.152	0.928	0.152	0.935	0.152	0.18	0.23	0.62	0.64	0.21	0.06	0.18	0.18	0.57	0.56
CG14464	2200744865	302	dll	Dict	0.5895				0.22	0.84	0.07	0.09	0.13	0.893	0.691	0.855	0.319	0.882	0.626	0.902	0.775	0.916	0.881	0.8412	0.0600754	0.894	0.152	0.854	0.152	0.885	0.152	0.911	0.152	0.924	0.152	0.68	0.66	0.07	0.15	0.59	0.59	0.03	0.11	0.06	0.04
CG14464	2200744865	302	dpp	Dict	0.7517		*		0.44	0.75	0.19	0.01	0.02	0.891	0.7	0.852	0.316	0.883	0.644	0.907	0.794	0.913	0.856	0.4649	0.0600754	0.891	0.152	0.853	0.152	0.884	0.152	0.902	0.152	0.92	0.152	0.58	0.59	0.35	0.4	0.49	0.42	0.15	0.2	0.22	0.21
CG14464	2200744865	302	ex	Dict	0.6895				0.04	0.82	0.43	0.12	0.04	0.914	0.73	0.883	0.322	0.91	0.661	0.92	0.832	0.947	0.875	5.4462	0.0600754	0.918	0.152	0.88	0.152	0.909	0.152	0.929	0.152	0.944	0.152	0.82	0.81	0.21	0.17	0.21	0.15	0.42	0.47	0.01	0.01
CG14464	2200744865	302	foxo	Dict	0.5176				0.34	0.29	0.45	0.29	0	0.752	0.553	0.703	0.242	0.741	0.489	0.775	0.636	0.778	0.742	0.2659	0.0600754	0.751	0.152	0.698	0.152	0.739	0.152	0.775	0.152	0.79	0.152	0.2	0.25	0.53	0.51	0.07	0.07	0.17	0.18	0.3	0.28
CG14464	2200744865	302	fz	Dict	0.5905				0.06	0.7	0.17	0.26	0.24	0.85	0.643	0.804	0.281	0.839	0.574	0.861	0.74	0.866	0.798	0.4509	0.0600754	0.841	0.152	0.79	0.152	0.826	0.152	0.861	0.152	0.882	0.152	0.77	0.78	0.15	0.08	0.06	0.08	0.02	0.03	0.39	0.4
CG14464	2200744865	302	mpk2	Dict	0.6365		*		0.18	0.68	0.09	0.37	0.15	0.846	0.633	0.806	0.278	0.839	0.57	0.862	0.742	0.889	0.829	0.4463	0.0600754	0.849	0.152	0.797	0.152	0.837	0.152	0.878	0.152	0.903	0.152	0.61	0.59	0.05	0.06	0.23	0.26	0.05	0.09	0.59	0.58
CG14464	2200744865	302	poc1	Dict	0.5567				0.34	0.49	0.08	0.28	0.08	0.801	0.576	0.742	0.257	0.791	0.523	0.832	0.664	0.843	0.724	0.4028	0.0600754	0.795	0.152	0.734	0.152	0.78	0.152	0.824	0.152	0.87	0.152	0.31	0.29	0.02	0.07	0.38	0.38	0.25	0.29	0.69	0.68
CG14464	2200744865	302	rho	Dict	0.7999		**		0.42	0.64	0.27	0.24	0.06	0.883	0.676	0.842	0.302	0.873	0.632	0.896	0.784	0.901	0.867	0.6139	0.0600754	0.882	0.152	0.835	0.152	0.87	0.152	0.895	0.152	0.913	0.152	0.45	0.44	0.28	0.37	0.56	0.47	0.39	0.44	0.18	0.17
CG14464	2200744865	302	sav	Dict	0.6879				0.34	0.81	0.01	0.18	0.13	0.914	0.732	0.873	0.328	0.904	0.656	0.928	0.795	0.931	0.931	0.5947	0.0600754	0.909	0.152	0.868	0.152	0.902	0.152	0.929	0.152	0.952	0.152	0.58	0.56	0.05	0.15	0.59	0.59	0.16	0.23	0.3	0.28
CG14464	2200744865	302	sgg	Dict	0.6498		*		0.51	0.37	0.25	0.17	0.44	0.862	0.625	0.799	0.263	0.848	0.576	0.881	0.727	0.9	0.823	1.7731	0.0600754	0.841	0.152	0.783	0.152	0.828	0.152	0.862	0.152	0.907	0.152	0.21	0.23	0.29	0.34	0.24	0.18	0.23	0.22	0.74	0.74
CG14464	2200744865	302	sls	Dict	0.5118				0.72	0.33	0.05	0.14	0.22	0.84	0.68	0.801	0.314	0.832	0.622	0.857	0.744	0.874	0.801	0.5182	0.0600754	0.839	0.152	0.799	0.152	0.832	0.152	0.859	0.152	0.883	0.152	0.03	0.07	0.46	0.61	0.64	0.52	0.12	0.06	0.21	0.16
CG14464	2200744865	302	spi	Dict	0.7261		**		0.23	0.37	0.57	0.11	0.37	0.827	0.601	0.778	0.242	0.821	0.54	0.837	0.698	0.84	0.809	0.4719	0.0600754	0.83	0.152	0.779	0.152	0.818	0.152	0.856	0.152	0.893	0.152	0.4	0.43	0.43	0.36	0.07	0.16	0.33	0.31	0.43	0.45
CG14464	2200744865	302	tai	Dict	0.6957				0.71	0.17	0.56	0.09	0.01	0.894	0.73	0.862	0.338	0.889	0.654	0.907	0.805	0.908	0.848	0.4654	0.0600754	0.899	0.152	0.868	0.152	0.893	0.152	0.908	0.152	0.921	0.152	0	0.07	0.78	0.84	0.33	0.1	0.31	0.32	0.15	0.14
CG14464	2200744865	302	tx	Dict	0.6416				0.06	0.74	0.53	0.01	0.18	0.914	0.73	0.868	0.33	0.9	0.655	0.928	0.801	0.928	0.839	0.9684	0.0600754	0.903	0.152	0.866	0.152	0.895	0.152	0.917	0.152	0.929	0.152	0.74	0.75	0.23	0.15	0.01	0.04	0.43	0.45	0.19	0.2
CG14521	3224770933	914	dll	Dict	0.539				0.22	0.84	0.07	0.09	0.13	0.893	0.691	0.855	0.319	0.882	0.626	0.902	0.775	0.916	0.881	0.8412	0.103946	0.894	0.152	0.854	0.152	0.885	0.152	0.911	0.152	0.924	0.152	0.68	0.66	0.07	0.15	0.59	0.59	0.03	0.11	0.06	0.04
CG14521	3224770933	914	ds	Dict	0.5677				0.39	0.84	0.12	0.23	0.09	0.937	0.759	0.903	0.356	0.929	0.684	0.943	0.852	0.947	0.903	5.7655	0.103946	0.932	0.152	0.898	0.152	0.925	0.152	0.944	0.152	0.956	0.152	0.89	0.85	0.21	0.26	0.14	0.21	0.26	0.31	0.22	0.21
CG14521	3224770933	914	ft	Dict	0.7307		*		0.39	0.75	0.08	0.35	0.1	0.927	0.72	0.889	0.323	0.919	0.649	0.933	0.808	0.941	0.888	4.3023	0.103946	0.916	0.152	0.877	0.152	0.907	0.152	0.938	0.152	0.95	0.152	0.77	0.7	0.42	0.43	0.25	0.36	0.22	0.28	0.21	0.2
CG14521	3224770933	914	fz	Dict	0.5027				0.06	0.7	0.17	0.26	0.24	0.85	0.643	0.804	0.281	0.839	0.574	0.861	0.74	0.866	0.798	0.4509	0.103946	0.841	0.152	0.79	0.152	0.826	0.152	0.861	0.152	0.882	0.152	0.77	0.78	0.15	0.08	0.06	0.08	0.02	0.03	0.39	0.4
CG14521	3224770933	914	limk1	Dict	0.6852		**		0.03	0.2	0.47	0.05	0.21	0.738	0.462	0.663	0.171	0.724	0.399	0.769	0.562	0.782	0.695	0.4325	0.103946	0.735	0.152	0.66	0.152	0.721	0.152	0.762	0.152	0.797	0.152	0.14	0.08	0.52	0.45	0.22	0.39	0.19	0.16	0.31	0.31
CG14521	3224770933	914	mats	Dict	0.7079		*		0.58	0.58	0.2	0.15	0.19	0.892	0.685	0.853	0.318	0.882	0.628	0.899	0.766	0.9	0.866	3.5887	0.103946	0.884	0.152	0.843	0.152	0.875	0.152	0.897	0.152	0.918	0.152	0.72	0.65	0.54	0.62	0.07	0.12	0.01	0.04	0.07	0.04
CG14521	3224770933	914	sav	Dict	0.501				0.34	0.81	0.01	0.18	0.13	0.914	0.732	0.873	0.328	0.904	0.656	0.928	0.795	0.931	0.931	0.5947	0.103946	0.909	0.152	0.868	0.152	0.902	0.152	0.929	0.152	0.952	0.152	0.58	0.56	0.05	0.15	0.59	0.59	0.16	0.23	0.3	0.28
CG14521	3224770933	914	sd	Dict	0.528				0.34	0.63	0.37	0.24	0.02	0.856	0.667	0.823	0.286	0.851	0.597	0.87	0.767	0.871	0.849	5.3633	0.103946	0.87	0.152	0.824	0.152	0.861	0.152	0.885	0.152	0.905	0.152	0.7	0.64	0.42	0.45	0.08	0.25	0.3	0.25	0.11	0.09
CG14521	3224770933	914	ubx	Dict	0.5004				0.45	0.7	0.38	0.06	0.15	0.916	0.737	0.881	0.325	0.908	0.669	0.924	0.823	0.952	0.891	0.6049	0.103946	0.91	0.152	0.876	0.152	0.902	0.152	0.929	0.152	0.943	0.152	0.74	0.7	0.38	0.42	0.12	0.27	0.29	0.22	0.23	0.25
CG14521	3224770933	914	vn	Dict	0.5976		*		0.07	0.55	0.02	0.2	0.09	0.774	0.525	0.715	0.229	0.762	0.472	0.814	0.609	0.817	0.672	1.2207	0.103946	0.762	0.152	0.696	0.152	0.746	0.152	0.799	0.152	0.855	0.152	0.46	0.41	0.22	0.15	0.38	0.43	0.37	0.4	0.27	0.29
CG14869	3211303202	819	brk	Dict	0.5016				0.23	0.77	0.25	0.5	0.11	0.919	0.718	0.886	0.323	0.914	0.651	0.937	0.802	0.946	0.885	2.1159	0.270977	0.925	0.152	0.883	0.152	0.916	0.152	0.939	0.152	0.957	0.152	0.69	0.71	0.37	0.36	0.24	0.17	0.03	0.08	0.36	0.33
CG14869	3211303202	819	bun	Dict	0.7137		*		0.18	0.78	0.06	0.17	0.19	0.885	0.664	0.841	0.31	0.875	0.609	0.91	0.742	0.935	0.885	0.7822	0.270977	0.887	0.152	0.834	0.152	0.874	0.152	0.905	0.152	0.925	0.152	0.54	0.52	0.04	0.14	0.61	0.58	0.13	0.22	0.05	0.09
CG14869	3211303202	819	bx	Dict	0.5001				0.2	0.83	0.2	0.29	0.05	0.899	0.714	0.867	0.309	0.895	0.651	0.907	0.792	0.914	0.858	1.1999	0.270977	0.901	0.152	0.863	0.152	0.894	0.152	0.918	0.152	0.934	0.152	0.79	0.8	0.29	0.26	0.25	0.22	0.02	0.06	0.34	0.32
CG14869	3211301200	819	cg14147	Dict	0.5079				0.55	0.18	0.24	0.12	0.04	0.733	0.54	0.685	0.256	0.721	0.496	0.752	0.618	0.76	0.693	0.3374	0.191481	0.737	0.152	0.68	0.152	0.721	0.152	0.759	0.152	0.801	0.152	0.38	0.37	0.21	0.34	0.32	0.21	0.4	0.39	0.38	0.38
CG14869	3211303202	819	d	Dict	0.6263		**		0.16	0.46	0.09	0.05	0.56	0.732	0.49	0.664	0.199	0.718	0.433	0.759	0.581	0.795	0.674	0.2325	0.270977	0.728	0.152	0.67	0.152	0.715	0.152	0.75	0.152	0.79	0.152	0.42	0.39	0.05	0.02	0.29	0.29	0.05	0.03	0.37	0.4
CG14869	3211303202	819	dad	Dict	0.5075				0.6	0.35	0.36	0.11	0.33	0.869	0.651	0.825	0.301	0.858	0.591	0.884	0.743	0.901	0.864	0.3276	0.270977	0.857	0.152	0.812	0.152	0.849	0.152	0.877	0.152	0.897	0.152	0.02	0.03	0.18	0.36	0.74	0.69	0.29	0.21	0.1	0.04
CG14869	3211301200	819	dally	Dict	0.5378				0.64	0.29	0.47	0.31	0.12	0.906	0.705	0.866	0.306	0.895	0.649	0.919	0.783	0.941	0.845	0.8955	0.191481	0.912	0.152	0.867	0.152	0.901	0.152	0.928	0.152	0.935	0.152	0.18	0.23	0.62	0.64	0.21	0.06	0.18	0.18	0.57	0.56
CG14869	3211303202	819	dll	Dict	0.6293				0.22	0.84	0.07	0.09	0.13	0.893	0.691	0.855	0.319	0.882	0.626	0.902	0.775	0.916	0.881	0.8412	0.270977	0.894	0.152	0.854	0.152	0.885	0.152	0.911	0.152	0.924	0.152	0.68	0.66	0.07	0.15	0.59	0.59	0.03	0.11	0.06	0.04
CG14869	3211301200	819	dlp	Dict	0.5592				0.22	0.56	0.21	0.39	0.18	0.845	0.586	0.784	0.258	0.829	0.528	0.86	0.691	0.881	0.769	0.9958	0.191481	0.815	0.152	0.755	0.152	0.8	0.152	0.84	0.152	0.86	0.152	0.56	0.54	0.26	0.3	0.02	0.14	0.16	0.13	0.33	0.32
CG14869	3211303202	819	dlp	Dict	0.5518				0.22	0.56	0.21	0.39	0.18	0.845	0.586	0.784	0.258	0.829	0.528	0.86	0.691	0.881	0.769	0.9958	0.270977	0.815	0.152	0.755	0.152	0.8	0.152	0.84	0.152	0.86	0.152	0.56	0.54	0.26	0.3	0.02	0.14	0.16	0.13	0.33	0.32
CG14869	3211303202	819	ds	Dict	0.6047				0.39	0.84	0.12	0.23	0.09	0.937	0.759	0.903	0.356	0.929	0.684	0.943	0.852	0.947	0.903	5.7655	0.270977	0.932	0.152	0.898	0.152	0.925	0.152	0.944	0.152	0.956	0.152	0.89	0.85	0.21	0.26	0.14	0.21	0.26	0.31	0.22	0.21
CG14869	3211303202	819	ft	Dict	0.6148				0.39	0.75	0.08	0.35	0.1	0.927	0.72	0.889	0.323	0.919	0.649	0.933	0.808	0.941	0.888	4.3023	0.270977	0.916	0.152	0.877	0.152	0.907	0.152	0.938	0.152	0.95	0.152	0.77	0.7	0.42	0.43	0.25	0.36	0.22	0.28	0.21	0.2
CG14869	3211303202	819	luna	Dict	0.6456				0.18	0.75	0.2	0.38	0.08	0.869	0.647	0.82	0.292	0.86	0.599	0.88	0.733	0.882	0.805	0.3695	0.270977	0.861	0.152	0.819	0.152	0.852	0.152	0.879	0.152	0.903	0.152	0.62	0.62	0.08	0.12	0.38	0.41	0.28	0.2	0.3	0.25
CG14869	3211303202	819	med	Dict	0.6802		*		0.17	0.63	0.24	0.37	0.19	0.855	0.625	0.8	0.281	0.843	0.558	0.875	0.718	0.896	0.847	0.768	0.270977	0.84	0.152	0.789	0.152	0.828	0.152	0.862	0.152	0.893	0.152	0.54	0.51	0.21	0.19	0.24	0.32	0.14	0.06	0.15	0.1
CG14869	3211301200	819	med	Dict	0.5427				0.17	0.63	0.24	0.37	0.19	0.855	0.625	0.8	0.281	0.843	0.558	0.875	0.718	0.896	0.847	0.768	0.191481	0.84	0.152	0.789	0.152	0.828	0.152	0.862	0.152	0.893	0.152	0.54	0.51	0.21	0.19	0.24	0.32	0.14	0.06	0.15	0.1
CG14869	3211303202	819	pnt	Dict	0.5983				0.28	0.69	0.03	0.39	0.09	0.858	0.653	0.816	0.281	0.853	0.584	0.873	0.772	0.886	0.829	0.9325	0.270977	0.843	0.152	0.802	0.152	0.836	0.152	0.865	0.152	0.891	0.152	0.52	0.53	0.21	0.26	0.4	0.37	0.11	0.04	0.34	0.29
CG14869	3211301200	819	rpt1	Dict	0.6045		*		0.04	0.25	0.66	0.15	0.07	0.793	0.555	0.721	0.245	0.77	0.503	0.816	0.623	0.817	0.725	0.264	0.191481	0.775	0.152	0.72	0.152	0.763	0.152	0.791	0.152	0.839	0.152	0.12	0.08	0.45	0.35	0.32	0.47	0.36	0.32	0.25	0.23
CG14869	3211301200	819	s6k	Dict	0.5443				0.41	0.16	0.42	0.15	0.43	0.797	0.575	0.75	0.247	0.785	0.514	0.818	0.673	0.836	0.777	0.3905	0.191481	0.79	0.152	0.728	0.152	0.774	0.152	0.814	0.152	0.852	0.152	0.22	0.16	0.48	0.46	0.17	0.29	0.14	0.09	0.47	0.48
CG14869	3211301200	819	sd	Dict	0.5882				0.34	0.63	0.37	0.24	0.02	0.856	0.667	0.823	0.286	0.851	0.597	0.87	0.767	0.871	0.849	5.3633	0.191481	0.87	0.152	0.824	0.152	0.861	0.152	0.885	0.152	0.905	0.152	0.7	0.64	0.42	0.45	0.08	0.25	0.3	0.25	0.11	0.09
CG14869	3211303202	819	sd	Dict	0.5534				0.34	0.63	0.37	0.24	0.02	0.856	0.667	0.823	0.286	0.851	0.597	0.87	0.767	0.871	0.849	5.3633	0.270977	0.87	0.152	0.824	0.152	0.861	0.152	0.885	0.152	0.905	0.152	0.7	0.64	0.42	0.45	0.08	0.25	0.3	0.25	0.11	0.09
CG14869	3211303202	819	ser	Dict	0.8164		**		0.11	0.78	0.3	0.27	0.16	0.893	0.688	0.842	0.31	0.879	0.621	0.905	0.793	0.918	0.869	0.4217	0.270977	0.876	0.152	0.833	0.152	0.868	0.152	0.891	0.152	0.919	0.152	0.69	0.66	0.2	0.16	0.36	0.45	0.2	0.11	0.1	0.06
CG14869	3211301200	819	ser	Dict	0.584				0.11	0.78	0.3	0.27	0.16	0.893	0.688	0.842	0.31	0.879	0.621	0.905	0.793	0.918	0.869	0.4217	0.191481	0.876	0.152	0.833	0.152	0.868	0.152	0.891	0.152	0.919	0.152	0.69	0.66	0.2	0.16	0.36	0.45	0.2	0.11	0.1	0.06
CG14869	3211301200	819	tai	Dict	0.6904				0.71	0.17	0.56	0.09	0.01	0.894	0.73	0.862	0.338	0.889	0.654	0.907	0.805	0.908	0.848	0.4654	0.191481	0.899	0.152	0.868	0.152	0.893	0.152	0.908	0.152	0.921	0.152	0	0.07	0.78	0.84	0.33	0.1	0.31	0.32	0.15	0.14
CG14869	3211303202	819	ubx	Dict	0.7956		*		0.45	0.7	0.38	0.06	0.15	0.916	0.737	0.881	0.325	0.908	0.669	0.924	0.823	0.952	0.891	0.6049	0.270977	0.91	0.152	0.876	0.152	0.902	0.152	0.929	0.152	0.943	0.152	0.74	0.7	0.38	0.42	0.12	0.27	0.29	0.22	0.23	0.25
CG14869	3211301200	819	ubx	Dict	0.7302				0.45	0.7	0.38	0.06	0.15	0.916	0.737	0.881	0.325	0.908	0.669	0.924	0.823	0.952	0.891	0.6049	0.191481	0.91	0.152	0.876	0.152	0.902	0.152	0.929	0.152	0.943	0.152	0.74	0.7	0.38	0.42	0.12	0.27	0.29	0.22	0.23	0.25
CG14926	2111348992	208	brk	Dict	0.5499				0.23	0.77	0.25	0.5	0.11	0.919	0.718	0.886	0.323	0.914	0.651	0.937	0.802	0.946	0.885	2.1159	0.00253518	0.925	0.152	0.883	0.152	0.916	0.152	0.939	0.152	0.957	0.152	0.69	0.71	0.37	0.36	0.24	0.17	0.03	0.08	0.36	0.33
CG14926	2111348992	208	cv2	Dict	0.5708				0.56	0.49	0.08	0.38	0.25	0.87	0.685	0.828	0.295	0.86	0.6	0.893	0.763	0.898	0.844	0.5685	0.00253518	0.859	0.152	0.814	0.152	0.85	0.152	0.878	0.152	0.914	0.152	0.31	0.35	0.38	0.43	0.3	0.25	0.13	0.11	0.62	0.59
CG14926	2111348992	208	dlp	Dict	0.525				0.22	0.56	0.21	0.39	0.18	0.845	0.586	0.784	0.258	0.829	0.528	0.86	0.691	0.881	0.769	0.9958	0.00253518	0.815	0.152	0.755	0.152	0.8	0.152	0.84	0.152	0.86	0.152	0.56	0.54	0.26	0.3	0.02	0.14	0.16	0.13	0.33	0.32
CG14926	2111348992	208	pnt	Dict	0.6101				0.28	0.69	0.03	0.39	0.09	0.858	0.653	0.816	0.281	0.853	0.584	0.873	0.772	0.886	0.829	0.9325	0.00253518	0.843	0.152	0.802	0.152	0.836	0.152	0.865	0.152	0.891	0.152	0.52	0.53	0.21	0.26	0.4	0.37	0.11	0.04	0.34	0.29
CG14926	2111348992	208	shn	Dict	0.5594		*		0.07	0.42	0.09	0.6	0.08	0.789	0.552	0.733	0.222	0.78	0.475	0.812	0.651	0.824	0.737	0.7674	0.00253518	0.779	0.152	0.71	0.152	0.762	0.152	0.81	0.152	0.865	0.152	0.35	0.37	0.05	0.03	0.05	0.08	0.21	0.19	0.46	0.41
CG15136	2117049354	254	aret	Dict	0.5112				0.66	0.06	0.37	0.12	0	0.844	0.652	0.797	0.293	0.836	0.595	0.861	0.737	0.868	0.861	0.4688	0.238494	0.843	0.152	0.795	0.152	0.833	0.152	0.863	0.152	0.885	0.152	0.22	0.23	0.02	0.18	0.65	0.65	0.14	0.1	0.52	0.5
CG15136	2117049354	254	btd	Dict	0.8083		**		0.83	0.17	0.22	0.01	0.09	0.891	0.703	0.854	0.334	0.882	0.638	0.904	0.803	0.91	0.863	0.5246	0.238494	0.889	0.152	0.851	0.152	0.882	0.152	0.899	0.152	0.921	0.152	0.06	0.02	0.53	0.66	0.51	0.36	0.14	0.16	0.45	0.44
CG15136	2117049354	254	caup	Dict	0.5108				0.39	0.27	0.36	0.28	0.08	0.739	0.514	0.677	0.216	0.722	0.459	0.77	0.596	0.771	0.643	0.3834	0.238494	0.746	0.152	0.685	0.152	0.729	0.152	0.769	0.152	0.794	0.152	0.08	0.11	0.36	0.43	0.31	0.18	0.42	0.43	0.06	0.06
CG15136	2117049354	254	cg14147	Dict	0.604		*		0.55	0.18	0.24	0.12	0.04	0.733	0.54	0.685	0.256	0.721	0.496	0.752	0.618	0.76	0.693	0.3374	0.238494	0.737	0.152	0.68	0.152	0.721	0.152	0.759	0.152	0.801	0.152	0.38	0.37	0.21	0.34	0.32	0.21	0.4	0.39	0.38	0.38
CG15136	2117049354	254	chn	Dict	0.5099				0.57	0.17	0.13	0.45	0.34	0.826	0.601	0.773	0.271	0.817	0.544	0.858	0.702	0.881	0.766	0.9439	0.238494	0.824	0.152	0.768	0.152	0.81	0.152	0.847	0.152	0.865	0.152	0.02	0.02	0.44	0.53	0.4	0.27	0.03	0.06	0.35	0.31
CG15136	2117049354	254	ct	Muta	0.561		*		0.54	0.02	0.38	0.03	0.09	0.705	0.538	0.664	0.253	0.701	0.484	0.718	0.607	0.733	0.65	0.0056	0.238494	0.715	0.152	0.672	0.152	0.705	0.152	0.731	0.152	0.766	0.152	0.12	0.08	0.47	0.51	0.18	0.03	0.25	0.22	0.25	0.27
CG15136	2117049354	254	cv2	Dict	0.5048				0.56	0.49	0.08	0.38	0.25	0.87	0.685	0.828	0.295	0.86	0.6	0.893	0.763	0.898	0.844	0.5685	0.238494	0.859	0.152	0.814	0.152	0.85	0.152	0.878	0.152	0.914	0.152	0.31	0.35	0.38	0.43	0.3	0.25	0.13	0.11	0.62	0.59
CG15136	2117049354	254	dally	Dict	0.6802				0.64	0.29	0.47	0.31	0.12	0.906	0.705	0.866	0.306	0.895	0.649	0.919	0.783	0.941	0.845	0.8955	0.238494	0.912	0.152	0.867	0.152	0.901	0.152	0.928	0.152	0.935	0.152	0.18	0.23	0.62	0.64	0.21	0.06	0.18	0.18	0.57	0.56
CG15136	2117049354	254	dsh	Dict	0.5254				0.68	0.51	0.24	0.14	0.1	0.91	0.72	0.873	0.33	0.9	0.649	0.92	0.793	0.934	0.84	1.1394	0.238494	0.91	0.152	0.871	0.152	0.9	0.152	0.923	0.152	0.937	0.152	0.68	0.66	0.19	0.35	0.33	0.27	0.26	0.26	0.32	0.3
CG15136	2117049354	254	egfr	Dict	0.6597		*		0.7	0.16	0.09	0.25	0.03	0.856	0.625	0.805	0.283	0.849	0.568	0.871	0.727	0.881	0.797	0.9394	0.238494	0.846	0.152	0.794	0.152	0.834	0.152	0.864	0.152	0.892	0.152	0.11	0.12	0.18	0.37	0.69	0.62	0.11	0.15	0.33	0.32
CG15136	2117049354	254	emc	Dict	0.6579		*		0.54	0.06	0.44	0.37	0.03	0.797	0.601	0.752	0.255	0.791	0.535	0.833	0.683	0.848	0.776	0.3552	0.238494	0.815	0.152	0.761	0.152	0.801	0.152	0.836	0.152	0.867	0.152	0.15	0.08	0.65	0.67	0.07	0.11	0.07	0.06	0.31	0.3
CG15136	2117049354	254	fj	Dict	0.7051				0.84	0.35	0.16	0.16	0.06	0.938	0.763	0.909	0.355	0.932	0.705	0.952	0.857	0.956	0.929	2.0627	0.238494	0.928	0.152	0.894	0.152	0.921	0.152	0.941	0.152	0.953	0.152	0.59	0.54	0.46	0.61	0.39	0.27	0.29	0.29	0.37	0.34
CG15136	2117049354	254	kn	Dict	0.6576		*		0.64	0.28	0.11	0.11	0.28	0.824	0.637	0.777	0.296	0.81	0.565	0.844	0.703	0.867	0.779	0.3931	0.238494	0.815	0.152	0.763	0.152	0.803	0.152	0.833	0.152	0.858	0.152	0.43	0.39	0.35	0.43	0.14	0.05	0.01	0.04	0.51	0.51
CG15136	2117049354	254	mad	Dict	0.7203				0.84	0.08	0.2	0.2	0.07	0.894	0.724	0.866	0.359	0.887	0.661	0.91	0.811	0.922	0.847	0.5446	0.238494	0.889	0.152	0.854	0.152	0.881	0.152	0.901	0.152	0.907	0.152	0.2	0.16	0.38	0.54	0.57	0.49	0.28	0.25	0.5	0.46
CG15136	2117049354	254	mats	Dict	0.5756				0.58	0.58	0.2	0.15	0.19	0.892	0.685	0.853	0.318	0.882	0.628	0.899	0.766	0.9	0.866	3.5887	0.238494	0.884	0.152	0.843	0.152	0.875	0.152	0.897	0.152	0.918	0.152	0.72	0.65	0.54	0.62	0.07	0.12	0.01	0.04	0.07	0.04
CG15136	2117049354	254	ptc	Dict	0.5434				0.6	0.19	0.19	0.05	0.47	0.847	0.608	0.783	0.28	0.832	0.556	0.855	0.7	0.862	0.784	1.9546	0.238494	0.831	0.152	0.769	0.152	0.813	0.152	0.863	0.152	0.884	0.152	0.46	0.46	0.19	0.39	0.58	0.48	0.06	0.01	0.05	0.01
CG15136	2117049354	254	s6k	Dict	0.5095				0.41	0.16	0.42	0.15	0.43	0.797	0.575	0.75	0.247	0.785	0.514	0.818	0.673	0.836	0.777	0.3905	0.238494	0.79	0.152	0.728	0.152	0.774	0.152	0.814	0.152	0.852	0.152	0.22	0.16	0.48	0.46	0.17	0.29	0.14	0.09	0.47	0.48
CG15136	2117049354	254	sd	Muta	0.5247				0.58	0.16	0.17	0.41	0.11	0.76	0.568	0.706	0.264	0.746	0.497	0.791	0.631	0.798	0.704	0.009	0.238494	0.778	0.152	0.726	0.152	0.767	0.152	0.799	0.152	0.844	0.152	0.13	0.14	0.1	0.29	0.69	0.63	0.11	0.16	0.02	0.04
CG15136	2117049354	254	sgg	Dict	0.5315				0.51	0.37	0.25	0.17	0.44	0.862	0.625	0.799	0.263	0.848	0.576	0.881	0.727	0.9	0.823	1.7731	0.238494	0.841	0.152	0.783	0.152	0.828	0.152	0.862	0.152	0.907	0.152	0.21	0.23	0.29	0.34	0.24	0.18	0.23	0.22	0.74	0.74
CG15136	2117049354	254	sls	Dict	0.6677				0.72	0.33	0.05	0.14	0.22	0.84	0.68	0.801	0.314	0.832	0.622	0.857	0.744	0.874	0.801	0.5182	0.238494	0.839	0.152	0.799	0.152	0.832	0.152	0.859	0.152	0.883	0.152	0.03	0.07	0.46	0.61	0.64	0.52	0.12	0.06	0.21	0.16
CG15136	2117049354	254	socs36e	Dict	0.534				0.74	0.08	0.47	0.09	0.11	0.886	0.717	0.854	0.333	0.88	0.654	0.898	0.808	0.901	0.891	0.4292	0.238494	0.88	0.152	0.846	0.152	0.872	0.152	0.895	0.152	0.911	0.152	0.19	0.17	0.15	0.33	0.64	0.63	0.43	0.39	0.26	0.24
CG15136	2117049354	254	tai	Dict	0.8532		**		0.71	0.17	0.56	0.09	0.01	0.894	0.73	0.862	0.338	0.889	0.654	0.907	0.805	0.908	0.848	0.4654	0.238494	0.899	0.152	0.868	0.152	0.893	0.152	0.908	0.152	0.921	0.152	0	0.07	0.78	0.84	0.33	0.1	0.31	0.32	0.15	0.14
CG15136	2117049354	254	tango14	Dict	0.7772		*		0.87	0.17	0.08	0.09	0.3	0.899	0.736	0.871	0.356	0.894	0.669	0.914	0.821	0.916	0.86	1.4426	0.238494	0.909	0.152	0.875	0.152	0.902	0.152	0.923	0.152	0.932	0.152	0.16	0.13	0.48	0.67	0.77	0.62	0.08	0.02	0.09	0.05
CG15136	2117049354	254	trh	Dict	0.5519		*		0.53	0.15	0.11	0.12	0.43	0.775	0.527	0.711	0.231	0.758	0.467	0.81	0.62	0.815	0.708	0.8179	0.238494	0.778	0.152	0.714	0.152	0.764	0.152	0.808	0.152	0.854	0.152	0.09	0.08	0.37	0.52	0.61	0.45	0.21	0.27	0.06	0.09
CG15136	2117049354	254	ubx	Dict	0.5505				0.45	0.7	0.38	0.06	0.15	0.916	0.737	0.881	0.325	0.908	0.669	0.924	0.823	0.952	0.891	0.6049	0.238494	0.91	0.152	0.876	0.152	0.902	0.152	0.929	0.152	0.943	0.152	0.74	0.7	0.38	0.42	0.12	0.27	0.29	0.22	0.23	0.25
CG15225	2216687385	420	cyce	Dict	0.5474				0.06	0.47	0.74	0.25	0.09	0.906	0.718	0.874	0.309	0.899	0.652	0.925	0.798	0.928	0.888	0.9349	0.354469	0.901	0.152	0.857	0.152	0.891	0.152	0.92	0.152	0.936	0.152	0.46	0.5	0.47	0.39	0.06	0.21	0.54	0.55	0.2	0.19
CG15225	2216687385	420	dsh	Dict	0.5594				0.68	0.51	0.24	0.14	0.1	0.91	0.72	0.873	0.33	0.9	0.649	0.92	0.793	0.934	0.84	1.1394	0.354469	0.91	0.152	0.871	0.152	0.9	0.152	0.923	0.152	0.937	0.152	0.68	0.66	0.19	0.35	0.33	0.27	0.26	0.26	0.32	0.3
CG15225	2216687385	420	socs36e	Dict	0.5784				0.74	0.08	0.47	0.09	0.11	0.886	0.717	0.854	0.333	0.88	0.654	0.898	0.808	0.901	0.891	0.4292	0.354469	0.88	0.152	0.846	0.152	0.872	0.152	0.895	0.152	0.911	0.152	0.19	0.17	0.15	0.33	0.64	0.63	0.43	0.39	0.26	0.24
CG15263	2115285567	242	ap	Dict	0.6439				0.13	0.81	0.11	0.15	0.22	0.856	0.666	0.815	0.299	0.847	0.607	0.87	0.745	0.871	0.826	0.394	0.632621	0.86	0.152	0.82	0.152	0.852	0.152	0.875	0.152	0.892	0.152	0.74	0.76	0.27	0.23	0.17	0.16	0.1	0.06	0.21	0.18
CG15263	2115285567	242	brk	Dict	0.7497		*		0.23	0.77	0.25	0.5	0.11	0.919	0.718	0.886	0.323	0.914	0.651	0.937	0.802	0.946	0.885	2.1159	0.632621	0.925	0.152	0.883	0.152	0.916	0.152	0.939	0.152	0.957	0.152	0.69	0.71	0.37	0.36	0.24	0.17	0.03	0.08	0.36	0.33
CG15263	2115285567	242	bun	Dict	0.7408		*		0.18	0.78	0.06	0.17	0.19	0.885	0.664	0.841	0.31	0.875	0.609	0.91	0.742	0.935	0.885	0.7822	0.632621	0.887	0.152	0.834	0.152	0.874	0.152	0.905	0.152	0.925	0.152	0.54	0.52	0.04	0.14	0.61	0.58	0.13	0.22	0.05	0.09
CG15263	2115285567	242	bx	Dict	0.7134				0.2	0.83	0.2	0.29	0.05	0.899	0.714	0.867	0.309	0.895	0.651	0.907	0.792	0.914	0.858	1.1999	0.632621	0.901	0.152	0.863	0.152	0.894	0.152	0.918	0.152	0.934	0.152	0.79	0.8	0.29	0.26	0.25	0.22	0.02	0.06	0.34	0.32
CG15263	2115285567	242	cyce	Dict	0.6082				0.06	0.47	0.74	0.25	0.09	0.906	0.718	0.874	0.309	0.899	0.652	0.925	0.798	0.928	0.888	0.9349	0.632621	0.901	0.152	0.857	0.152	0.891	0.152	0.92	0.152	0.936	0.152	0.46	0.5	0.47	0.39	0.06	0.21	0.54	0.55	0.2	0.19
CG15263	2115285567	242	d	Dict	0.5399		*		0.16	0.46	0.09	0.05	0.56	0.732	0.49	0.664	0.199	0.718	0.433	0.759	0.581	0.795	0.674	0.2325	0.632621	0.728	0.152	0.67	0.152	0.715	0.152	0.75	0.152	0.79	0.152	0.42	0.39	0.05	0.02	0.29	0.29	0.05	0.03	0.37	0.4
CG15263	2115285567	242	dll	Dict	0.7626		*		0.22	0.84	0.07	0.09	0.13	0.893	0.691	0.855	0.319	0.882	0.626	0.902	0.775	0.916	0.881	0.8412	0.632621	0.894	0.152	0.854	0.152	0.885	0.152	0.911	0.152	0.924	0.152	0.68	0.66	0.07	0.15	0.59	0.59	0.03	0.11	0.06	0.04
CG15263	2115285567	242	dpp	Dict	0.6662				0.44	0.75	0.19	0.01	0.02	0.891	0.7	0.852	0.316	0.883	0.644	0.907	0.794	0.913	0.856	0.4649	0.632621	0.891	0.152	0.853	0.152	0.884	0.152	0.902	0.152	0.92	0.152	0.58	0.59	0.35	0.4	0.49	0.42	0.15	0.2	0.22	0.21
CG15263	2115285567	242	ds	Dict	0.7469				0.39	0.84	0.12	0.23	0.09	0.937	0.759	0.903	0.356	0.929	0.684	0.943	0.852	0.947	0.903	5.7655	0.632621	0.932	0.152	0.898	0.152	0.925	0.152	0.944	0.152	0.956	0.152	0.89	0.85	0.21	0.26	0.14	0.21	0.26	0.31	0.22	0.21
CG15263	2115285567	242	ex	Dict	0.8292		*		0.04	0.82	0.43	0.12	0.04	0.914	0.73	0.883	0.322	0.91	0.661	0.92	0.832	0.947	0.875	5.4462	0.632621	0.918	0.152	0.88	0.152	0.909	0.152	0.929	0.152	0.944	0.152	0.82	0.81	0.21	0.17	0.21	0.15	0.42	0.47	0.01	0.01
CG15263	2115285567	242	ft	Dict	0.6418				0.39	0.75	0.08	0.35	0.1	0.927	0.72	0.889	0.323	0.919	0.649	0.933	0.808	0.941	0.888	4.3023	0.632621	0.916	0.152	0.877	0.152	0.907	0.152	0.938	0.152	0.95	0.152	0.77	0.7	0.42	0.43	0.25	0.36	0.22	0.28	0.21	0.2
CG15263	2115285567	242	luna	Dict	0.6434				0.18	0.75	0.2	0.38	0.08	0.869	0.647	0.82	0.292	0.86	0.599	0.88	0.733	0.882	0.805	0.3695	0.632621	0.861	0.152	0.819	0.152	0.852	0.152	0.879	0.152	0.903	0.152	0.62	0.62	0.08	0.12	0.38	0.41	0.28	0.2	0.3	0.25
CG15263	2115285567	242	med	Dict	0.5456				0.17	0.63	0.24	0.37	0.19	0.855	0.625	0.8	0.281	0.843	0.558	0.875	0.718	0.896	0.847	0.768	0.632621	0.84	0.152	0.789	0.152	0.828	0.152	0.862	0.152	0.893	0.152	0.54	0.51	0.21	0.19	0.24	0.32	0.14	0.06	0.15	0.1
CG15263	2115285567	242	mpk2	Dict	0.5813				0.18	0.68	0.09	0.37	0.15	0.846	0.633	0.806	0.278	0.839	0.57	0.862	0.742	0.889	0.829	0.4463	0.632621	0.849	0.152	0.797	0.152	0.837	0.152	0.878	0.152	0.903	0.152	0.61	0.59	0.05	0.06	0.23	0.26	0.05	0.09	0.59	0.58
CG15263	2115285567	242	nmo	Dict	0.6983				0.31	0.81	0.35	0.29	0.15	0.94	0.734	0.907	0.346	0.934	0.656	0.96	0.831	0.961	0.909	2.0873	0.632621	0.938	0.152	0.902	0.152	0.931	0.152	0.953	0.152	0.963	0.152	0.92	0.92	0.07	0.06	0.16	0.13	0.17	0.2	0.2	0.2
CG15263	2115285567	242	pnt	Dict	0.6256				0.28	0.69	0.03	0.39	0.09	0.858	0.653	0.816	0.281	0.853	0.584	0.873	0.772	0.886	0.829	0.9325	0.632621	0.843	0.152	0.802	0.152	0.836	0.152	0.865	0.152	0.891	0.152	0.52	0.53	0.21	0.26	0.4	0.37	0.11	0.04	0.34	0.29
CG15263	2115285567	242	rho	Dict	0.6742				0.42	0.64	0.27	0.24	0.06	0.883	0.676	0.842	0.302	0.873	0.632	0.896	0.784	0.901	0.867	0.6139	0.632621	0.882	0.152	0.835	0.152	0.87	0.152	0.895	0.152	0.913	0.152	0.45	0.44	0.28	0.37	0.56	0.47	0.39	0.44	0.18	0.17
CG15263	2115285567	242	sav	Dict	0.7136				0.34	0.81	0.01	0.18	0.13	0.914	0.732	0.873	0.328	0.904	0.656	0.928	0.795	0.931	0.931	0.5947	0.632621	0.909	0.152	0.868	0.152	0.902	0.152	0.929	0.152	0.952	0.152	0.58	0.56	0.05	0.15	0.59	0.59	0.16	0.23	0.3	0.28
CG15263	2115285567	242	ser	Dict	0.6105				0.11	0.78	0.3	0.27	0.16	0.893	0.688	0.842	0.31	0.879	0.621	0.905	0.793	0.918	0.869	0.4217	0.632621	0.876	0.152	0.833	0.152	0.868	0.152	0.891	0.152	0.919	0.152	0.69	0.66	0.2	0.16	0.36	0.45	0.2	0.11	0.1	0.06
CG15263	2115285567	242	stan	Dict	0.5996		*		0.2	0.44	0.52	0.16	0.03	0.797	0.577	0.744	0.261	0.787	0.515	0.815	0.663	0.834	0.797	0.2999	0.632621	0.795	0.152	0.741	0.152	0.785	0.152	0.827	0.152	0.875	0.152	0.48	0.46	0.11	0.04	0.08	0.12	0.49	0.5	0.04	0.02
CG15263	2115285567	242	stg	Dict	0.5605				0.25	0.54	0.35	0.48	0.09	0.864	0.657	0.816	0.263	0.854	0.585	0.882	0.756	0.884	0.858	1.0297	0.632621	0.866	0.152	0.81	0.152	0.852	0.152	0.889	0.152	0.914	0.152	0.63	0.59	0.01	0.07	0.07	0.06	0.41	0.44	0.37	0.33
CG15263	2115285567	242	tx	Dict	0.7363		*		0.06	0.74	0.53	0.01	0.18	0.914	0.73	0.868	0.33	0.9	0.655	0.928	0.801	0.928	0.839	0.9684	0.632621	0.903	0.152	0.866	0.152	0.895	0.152	0.917	0.152	0.929	0.152	0.74	0.75	0.23	0.15	0.01	0.04	0.43	0.45	0.19	0.2
CG15263	2115285567	242	wts	Dict	0.6095				0.36	0.69	0.38	0.08	0.22	0.894	0.718	0.857	0.324	0.886	0.645	0.917	0.809	0.926	0.882	0.9344	0.632621	0.887	0.152	0.845	0.152	0.877	0.152	0.901	0.152	0.918	0.152	0.79	0.77	0.09	0.2	0.16	0.12	0.41	0.42	0.22	0.24
CG15365	1008949551	48	ap	Dict	0.5247				0.13	0.81	0.11	0.15	0.22	0.856	0.666	0.815	0.299	0.847	0.607	0.87	0.745	0.871	0.826	0.394	0.973102	0.86	0.152	0.82	0.152	0.852	0.152	0.875	0.152	0.892	0.152	0.74	0.76	0.27	0.23	0.17	0.16	0.1	0.06	0.21	0.18
CG15365	1008949551	48	aret	Dict	0.5233				0.66	0.06	0.37	0.12	0	0.844	0.652	0.797	0.293	0.836	0.595	0.861	0.737	0.868	0.861	0.4688	0.973102	0.843	0.152	0.795	0.152	0.833	0.152	0.863	0.152	0.885	0.152	0.22	0.23	0.02	0.18	0.65	0.65	0.14	0.1	0.52	0.5
CG15365	1008949551	48	brk	Dict	0.61				0.23	0.77	0.25	0.5	0.11	0.919	0.718	0.886	0.323	0.914	0.651	0.937	0.802	0.946	0.885	2.1159	0.973102	0.925	0.152	0.883	0.152	0.916	0.152	0.939	0.152	0.957	0.152	0.69	0.71	0.37	0.36	0.24	0.17	0.03	0.08	0.36	0.33
CG15365	1008949551	48	bsk	Dict	0.517				0.12	0.05	0.62	0.23	0.07	0.742	0.522	0.689	0.218	0.733	0.458	0.75	0.61	0.791	0.715	0.6289	0.973102	0.771	0.152	0.715	0.152	0.759	0.152	0.802	0.152	0.862	0.152	0.22	0.28	0.54	0.4	0.36	0.51	0.22	0.19	0.51	0.49
CG15365	1008949551	48	bx	Dict	0.564				0.2	0.83	0.2	0.29	0.05	0.899	0.714	0.867	0.309	0.895	0.651	0.907	0.792	0.914	0.858	1.1999	0.973102	0.901	0.152	0.863	0.152	0.894	0.152	0.918	0.152	0.934	0.152	0.79	0.8	0.29	0.26	0.25	0.22	0.02	0.06	0.34	0.32
CG15365	1008949551	48	cyce	Dict	0.733		*		0.06	0.47	0.74	0.25	0.09	0.906	0.718	0.874	0.309	0.899	0.652	0.925	0.798	0.928	0.888	0.9349	0.973102	0.901	0.152	0.857	0.152	0.891	0.152	0.92	0.152	0.936	0.152	0.46	0.5	0.47	0.39	0.06	0.21	0.54	0.55	0.2	0.19
CG15365	1008949551	48	ds	Dict	0.6849				0.39	0.84	0.12	0.23	0.09	0.937	0.759	0.903	0.356	0.929	0.684	0.943	0.852	0.947	0.903	5.7655	0.973102	0.932	0.152	0.898	0.152	0.925	0.152	0.944	0.152	0.956	0.152	0.89	0.85	0.21	0.26	0.14	0.21	0.26	0.31	0.22	0.21
CG15365	1008949551	48	dsh	Dict	0.7699		*		0.68	0.51	0.24	0.14	0.1	0.91	0.72	0.873	0.33	0.9	0.649	0.92	0.793	0.934	0.84	1.1394	0.973102	0.91	0.152	0.871	0.152	0.9	0.152	0.923	0.152	0.937	0.152	0.68	0.66	0.19	0.35	0.33	0.27	0.26	0.26	0.32	0.3
CG15365	1008949551	48	ex	Dict	0.6915				0.04	0.82	0.43	0.12	0.04	0.914	0.73	0.883	0.322	0.91	0.661	0.92	0.832	0.947	0.875	5.4462	0.973102	0.918	0.152	0.88	0.152	0.909	0.152	0.929	0.152	0.944	0.152	0.82	0.81	0.21	0.17	0.21	0.15	0.42	0.47	0.01	0.01
CG15365	1008949551	48	fj	Dict	0.6455				0.84	0.35	0.16	0.16	0.06	0.938	0.763	0.909	0.355	0.932	0.705	0.952	0.857	0.956	0.929	2.0627	0.973102	0.928	0.152	0.894	0.152	0.921	0.152	0.941	0.152	0.953	0.152	0.59	0.54	0.46	0.61	0.39	0.27	0.29	0.29	0.37	0.34
CG15365	1008949551	48	hpo	Dict	0.5239		*		0.4	0.22	0.22	0.18	0.14	0.782	0.521	0.706	0.219	0.762	0.468	0.822	0.631	0.829	0.822	0.3556	0.973102	0.755	0.152	0.68	0.152	0.736	0.152	0.794	0.152	0.822	0.152	0.33	0.33	0.09	0.2	0.34	0.31	0.21	0.19	0.06	0.07
CG15365	1008949551	48	nmo	Dict	0.8389		**		0.31	0.81	0.35	0.29	0.15	0.94	0.734	0.907	0.346	0.934	0.656	0.96	0.831	0.961	0.909	2.0873	0.973102	0.938	0.152	0.902	0.152	0.931	0.152	0.953	0.152	0.963	0.152	0.92	0.92	0.07	0.06	0.16	0.13	0.17	0.2	0.2	0.2
CG15365	1008949551	48	socs36e	Dict	0.614				0.74	0.08	0.47	0.09	0.11	0.886	0.717	0.854	0.333	0.88	0.654	0.898	0.808	0.901	0.891	0.4292	0.973102	0.88	0.152	0.846	0.152	0.872	0.152	0.895	0.152	0.911	0.152	0.19	0.17	0.15	0.33	0.64	0.63	0.43	0.39	0.26	0.24
CG15365	1008949551	48	stan	Dict	0.5151				0.2	0.44	0.52	0.16	0.03	0.797	0.577	0.744	0.261	0.787	0.515	0.815	0.663	0.834	0.797	0.2999	0.973102	0.795	0.152	0.741	0.152	0.785	0.152	0.827	0.152	0.875	0.152	0.48	0.46	0.11	0.04	0.08	0.12	0.49	0.5	0.04	0.02
CG15365	1008949551	48	stg	Dict	0.5039				0.25	0.54	0.35	0.48	0.09	0.864	0.657	0.816	0.263	0.854	0.585	0.882	0.756	0.884	0.858	1.0297	0.973102	0.866	0.152	0.81	0.152	0.852	0.152	0.889	0.152	0.914	0.152	0.63	0.59	0.01	0.07	0.07	0.06	0.41	0.44	0.37	0.33
CG15365	1008949551	48	tmod	Dict	0.5413				0.2	0.49	0.1	0.6	0.13	0.821	0.592	0.765	0.243	0.814	0.518	0.84	0.668	0.868	0.753	0.6584	0.973102	0.822	0.152	0.761	0.152	0.81	0.152	0.852	0.152	0.876	0.152	0.57	0.56	0.02	0.09	0.05	0.01	0.01	0.04	0.36	0.34
CG15365	1008949551	48	tx	Dict	0.7096				0.06	0.74	0.53	0.01	0.18	0.914	0.73	0.868	0.33	0.9	0.655	0.928	0.801	0.928	0.839	0.9684	0.973102	0.903	0.152	0.866	0.152	0.895	0.152	0.917	0.152	0.929	0.152	0.74	0.75	0.23	0.15	0.01	0.04	0.43	0.45	0.19	0.2
CG15365	1008949551	48	wts	Dict	0.7269		*		0.36	0.69	0.38	0.08	0.22	0.894	0.718	0.857	0.324	0.886	0.645	0.917	0.809	0.926	0.882	0.9344	0.973102	0.887	0.152	0.845	0.152	0.877	0.152	0.901	0.152	0.918	0.152	0.79	0.77	0.09	0.2	0.16	0.12	0.41	0.42	0.22	0.24
CG15431	2104418704	152	ap	Dict	0.5271				0.13	0.81	0.11	0.15	0.22	0.856	0.666	0.815	0.299	0.847	0.607	0.87	0.745	0.871	0.826	0.394	0.460438	0.86	0.152	0.82	0.152	0.852	0.152	0.875	0.152	0.892	0.152	0.74	0.76	0.27	0.23	0.17	0.16	0.1	0.06	0.21	0.18
CG15431	2104418704	152	brk	Dict	0.5101				0.23	0.77	0.25	0.5	0.11	0.919	0.718	0.886	0.323	0.914	0.651	0.937	0.802	0.946	0.885	2.1159	0.460438	0.925	0.152	0.883	0.152	0.916	0.152	0.939	0.152	0.957	0.152	0.69	0.71	0.37	0.36	0.24	0.17	0.03	0.08	0.36	0.33
CG15431	2104420181	154	btd	Dict	0.5816				0.83	0.17	0.22	0.01	0.09	0.891	0.703	0.854	0.334	0.882	0.638	0.904	0.803	0.91	0.863	0.5246	1.04523	0.889	0.152	0.851	0.152	0.882	0.152	0.899	0.152	0.921	0.152	0.06	0.02	0.53	0.66	0.51	0.36	0.14	0.16	0.45	0.44
CG15431	2104418704	152	bx	Dict	0.6308				0.2	0.83	0.2	0.29	0.05	0.899	0.714	0.867	0.309	0.895	0.651	0.907	0.792	0.914	0.858	1.1999	0.460438	0.901	0.152	0.863	0.152	0.894	0.152	0.918	0.152	0.934	0.152	0.79	0.8	0.29	0.26	0.25	0.22	0.02	0.06	0.34	0.32
CG15431	2104420181	154	cg14147	Dict	0.5404		*		0.55	0.18	0.24	0.12	0.04	0.733	0.54	0.685	0.256	0.721	0.496	0.752	0.618	0.76	0.693	0.3374	1.04523	0.737	0.152	0.68	0.152	0.721	0.152	0.759	0.152	0.801	0.152	0.38	0.37	0.21	0.34	0.32	0.21	0.4	0.39	0.38	0.38
CG15431	2104420181	154	ct	Muta	0.5666		*		0.54	0.02	0.38	0.03	0.09	0.705	0.538	0.664	0.253	0.701	0.484	0.718	0.607	0.733	0.65	0.0056	1.04523	0.715	0.152	0.672	0.152	0.705	0.152	0.731	0.152	0.766	0.152	0.12	0.08	0.47	0.51	0.18	0.03	0.25	0.22	0.25	0.27
CG15431	2104420181	154	d	Dict	0.59		**		0.16	0.46	0.09	0.05	0.56	0.732	0.49	0.664	0.199	0.718	0.433	0.759	0.581	0.795	0.674	0.2325	1.04523	0.728	0.152	0.67	0.152	0.715	0.152	0.75	0.152	0.79	0.152	0.42	0.39	0.05	0.02	0.29	0.29	0.05	0.03	0.37	0.4
CG15431	2104418704	152	d	Dict	0.5036		*		0.16	0.46	0.09	0.05	0.56	0.732	0.49	0.664	0.199	0.718	0.433	0.759	0.581	0.795	0.674	0.2325	0.460438	0.728	0.152	0.67	0.152	0.715	0.152	0.75	0.152	0.79	0.152	0.42	0.39	0.05	0.02	0.29	0.29	0.05	0.03	0.37	0.4
CG15431	2104418704	152	dgo	Dict	0.761		**		0.31	0.6	0.04	0.22	0.16	0.815	0.614	0.762	0.276	0.801	0.553	0.832	0.684	0.856	0.801	0.4284	0.460438	0.789	0.152	0.742	0.152	0.777	0.152	0.819	0.152	0.84	0.152	0.66	0.61	0.24	0.26	0.17	0.23	0.22	0.26	0.23	0.21
CG15431	2104420181	154	dgo	Dict	0.5969				0.31	0.6	0.04	0.22	0.16	0.815	0.614	0.762	0.276	0.801	0.553	0.832	0.684	0.856	0.801	0.4284	1.04523	0.789	0.152	0.742	0.152	0.777	0.152	0.819	0.152	0.84	0.152	0.66	0.61	0.24	0.26	0.17	0.23	0.22	0.26	0.23	0.21
CG15431	2104418704	152	dll	Dict	0.7826		**		0.22	0.84	0.07	0.09	0.13	0.893	0.691	0.855	0.319	0.882	0.626	0.902	0.775	0.916	0.881	0.8412	0.460438	0.894	0.152	0.854	0.152	0.885	0.152	0.911	0.152	0.924	0.152	0.68	0.66	0.07	0.15	0.59	0.59	0.03	0.11	0.06	0.04
CG15431	2104418704	152	dpp	Dict	0.5674				0.44	0.75	0.19	0.01	0.02	0.891	0.7	0.852	0.316	0.883	0.644	0.907	0.794	0.913	0.856	0.4649	0.460438	0.891	0.152	0.853	0.152	0.884	0.152	0.902	0.152	0.92	0.152	0.58	0.59	0.35	0.4	0.49	0.42	0.15	0.2	0.22	0.21
CG15431	2104418704	152	ds	Dict	0.8897		**		0.39	0.84	0.12	0.23	0.09	0.937	0.759	0.903	0.356	0.929	0.684	0.943	0.852	0.947	0.903	5.7655	0.460438	0.932	0.152	0.898	0.152	0.925	0.152	0.944	0.152	0.956	0.152	0.89	0.85	0.21	0.26	0.14	0.21	0.26	0.31	0.22	0.21
CG15431	2104420181	154	ds	Dict	0.6801				0.39	0.84	0.12	0.23	0.09	0.937	0.759	0.903	0.356	0.929	0.684	0.943	0.852	0.947	0.903	5.7655	1.04523	0.932	0.152	0.898	0.152	0.925	0.152	0.944	0.152	0.956	0.152	0.89	0.85	0.21	0.26	0.14	0.21	0.26	0.31	0.22	0.21
CG15431	2104420181	154	dsh	Dict	0.5782				0.68	0.51	0.24	0.14	0.1	0.91	0.72	0.873	0.33	0.9	0.649	0.92	0.793	0.934	0.84	1.1394	1.04523	0.91	0.152	0.871	0.152	0.9	0.152	0.923	0.152	0.937	0.152	0.68	0.66	0.19	0.35	0.33	0.27	0.26	0.26	0.32	0.3
CG15431	2104418704	152	dsh	Dict	0.5124				0.68	0.51	0.24	0.14	0.1	0.91	0.72	0.873	0.33	0.9	0.649	0.92	0.793	0.934	0.84	1.1394	0.460438	0.91	0.152	0.871	0.152	0.9	0.152	0.923	0.152	0.937	0.152	0.68	0.66	0.19	0.35	0.33	0.27	0.26	0.26	0.32	0.3
CG15431	2104420181	154	emc	Dict	0.5025				0.54	0.06	0.44	0.37	0.03	0.797	0.601	0.752	0.255	0.791	0.535	0.833	0.683	0.848	0.776	0.3552	1.04523	0.815	0.152	0.761	0.152	0.801	0.152	0.836	0.152	0.867	0.152	0.15	0.08	0.65	0.67	0.07	0.11	0.07	0.06	0.31	0.3
CG15431	2104418704	152	ex	Dict	0.7636		*		0.04	0.82	0.43	0.12	0.04	0.914	0.73	0.883	0.322	0.91	0.661	0.92	0.832	0.947	0.875	5.4462	0.460438	0.918	0.152	0.88	0.152	0.909	0.152	0.929	0.152	0.944	0.152	0.82	0.81	0.21	0.17	0.21	0.15	0.42	0.47	0.01	0.01
CG15431	2104420181	154	fj	Dict	0.7366				0.84	0.35	0.16	0.16	0.06	0.938	0.763	0.909	0.355	0.932	0.705	0.952	0.857	0.956	0.929	2.0627	1.04523	0.928	0.152	0.894	0.152	0.921	0.152	0.941	0.152	0.953	0.152	0.59	0.54	0.46	0.61	0.39	0.27	0.29	0.29	0.37	0.34
CG15431	2104418704	152	fj	Dict	0.5672				0.84	0.35	0.16	0.16	0.06	0.938	0.763	0.909	0.355	0.932	0.705	0.952	0.857	0.956	0.929	2.0627	0.460438	0.928	0.152	0.894	0.152	0.921	0.152	0.941	0.152	0.953	0.152	0.59	0.54	0.46	0.61	0.39	0.27	0.29	0.29	0.37	0.34
CG15431	2104418704	152	ft	Dict	0.8488		**		0.39	0.75	0.08	0.35	0.1	0.927	0.72	0.889	0.323	0.919	0.649	0.933	0.808	0.941	0.888	4.3023	0.460438	0.916	0.152	0.877	0.152	0.907	0.152	0.938	0.152	0.95	0.152	0.77	0.7	0.42	0.43	0.25	0.36	0.22	0.28	0.21	0.2
CG15431	2104420181	154	ft	Dict	0.6977				0.39	0.75	0.08	0.35	0.1	0.927	0.72	0.889	0.323	0.919	0.649	0.933	0.808	0.941	0.888	4.3023	1.04523	0.916	0.152	0.877	0.152	0.907	0.152	0.938	0.152	0.95	0.152	0.77	0.7	0.42	0.43	0.25	0.36	0.22	0.28	0.21	0.2
CG15431	2104418704	152	fz	Dict	0.5859				0.06	0.7	0.17	0.26	0.24	0.85	0.643	0.804	0.281	0.839	0.574	0.861	0.74	0.866	0.798	0.4509	0.460438	0.841	0.152	0.79	0.152	0.826	0.152	0.861	0.152	0.882	0.152	0.77	0.78	0.15	0.08	0.06	0.08	0.02	0.03	0.39	0.4
CG15431	2104420181	154	kn	Dict	0.7143		**		0.64	0.28	0.11	0.11	0.28	0.824	0.637	0.777	0.296	0.81	0.565	0.844	0.703	0.867	0.779	0.3931	1.04523	0.815	0.152	0.763	0.152	0.803	0.152	0.833	0.152	0.858	0.152	0.43	0.39	0.35	0.43	0.14	0.05	0.01	0.04	0.51	0.51
CG15431	2104418704	152	luna	Dict	0.5227				0.18	0.75	0.2	0.38	0.08	0.869	0.647	0.82	0.292	0.86	0.599	0.88	0.733	0.882	0.805	0.3695	0.460438	0.861	0.152	0.819	0.152	0.852	0.152	0.879	0.152	0.903	0.152	0.62	0.62	0.08	0.12	0.38	0.41	0.28	0.2	0.3	0.25
CG15431	2104420181	154	mad	Dict	0.5248				0.84	0.08	0.2	0.2	0.07	0.894	0.724	0.866	0.359	0.887	0.661	0.91	0.811	0.922	0.847	0.5446	1.04523	0.889	0.152	0.854	0.152	0.881	0.152	0.901	0.152	0.907	0.152	0.2	0.16	0.38	0.54	0.57	0.49	0.28	0.25	0.5	0.46
CG15431	2104418704	152	mats	Dict	0.7163		*		0.58	0.58	0.2	0.15	0.19	0.892	0.685	0.853	0.318	0.882	0.628	0.899	0.766	0.9	0.866	3.5887	0.460438	0.884	0.152	0.843	0.152	0.875	0.152	0.897	0.152	0.918	0.152	0.72	0.65	0.54	0.62	0.07	0.12	0.01	0.04	0.07	0.04
CG15431	2104420181	154	mats	Dict	0.6842				0.58	0.58	0.2	0.15	0.19	0.892	0.685	0.853	0.318	0.882	0.628	0.899	0.766	0.9	0.866	3.5887	1.04523	0.884	0.152	0.843	0.152	0.875	0.152	0.897	0.152	0.918	0.152	0.72	0.65	0.54	0.62	0.07	0.12	0.01	0.04	0.07	0.04
CG15431	2104420181	154	med	Dict	0.5225				0.17	0.63	0.24	0.37	0.19	0.855	0.625	0.8	0.281	0.843	0.558	0.875	0.718	0.896	0.847	0.768	1.04523	0.84	0.152	0.789	0.152	0.828	0.152	0.862	0.152	0.893	0.152	0.54	0.51	0.21	0.19	0.24	0.32	0.14	0.06	0.15	0.1
CG15431	2104418704	152	mpk2	Dict	0.5091				0.18	0.68	0.09	0.37	0.15	0.846	0.633	0.806	0.278	0.839	0.57	0.862	0.742	0.889	0.829	0.4463	0.460438	0.849	0.152	0.797	0.152	0.837	0.152	0.878	0.152	0.903	0.152	0.61	0.59	0.05	0.06	0.23	0.26	0.05	0.09	0.59	0.58
CG15431	2104418704	152	nmo	Dict	0.7103				0.31	0.81	0.35	0.29	0.15	0.94	0.734	0.907	0.346	0.934	0.656	0.96	0.831	0.961	0.909	2.0873	0.460438	0.938	0.152	0.902	0.152	0.931	0.152	0.953	0.152	0.963	0.152	0.92	0.92	0.07	0.06	0.16	0.13	0.17	0.2	0.2	0.2
CG15431	2104418704	152	rho	Dict	0.558				0.42	0.64	0.27	0.24	0.06	0.883	0.676	0.842	0.302	0.873	0.632	0.896	0.784	0.901	0.867	0.6139	0.460438	0.882	0.152	0.835	0.152	0.87	0.152	0.895	0.152	0.913	0.152	0.45	0.44	0.28	0.37	0.56	0.47	0.39	0.44	0.18	0.17
CG15431	2104420181	154	s6k	Dict	0.7075		**		0.41	0.16	0.42	0.15	0.43	0.797	0.575	0.75	0.247	0.785	0.514	0.818	0.673	0.836	0.777	0.3905	1.04523	0.79	0.152	0.728	0.152	0.774	0.152	0.814	0.152	0.852	0.152	0.22	0.16	0.48	0.46	0.17	0.29	0.14	0.09	0.47	0.48
CG15431	2104418704	152	sav	Dict	0.6154				0.34	0.81	0.01	0.18	0.13	0.914	0.732	0.873	0.328	0.904	0.656	0.928	0.795	0.931	0.931	0.5947	0.460438	0.909	0.152	0.868	0.152	0.902	0.152	0.929	0.152	0.952	0.152	0.58	0.56	0.05	0.15	0.59	0.59	0.16	0.23	0.3	0.28
CG15431	2104420181	154	sd	Dict	0.7017		*		0.34	0.63	0.37	0.24	0.02	0.856	0.667	0.823	0.286	0.851	0.597	0.87	0.767	0.871	0.849	5.3633	1.04523	0.87	0.152	0.824	0.152	0.861	0.152	0.885	0.152	0.905	0.152	0.7	0.64	0.42	0.45	0.08	0.25	0.3	0.25	0.11	0.09
CG15431	2104418704	152	sd	Dict	0.6831		*		0.34	0.63	0.37	0.24	0.02	0.856	0.667	0.823	0.286	0.851	0.597	0.87	0.767	0.871	0.849	5.3633	0.460438	0.87	0.152	0.824	0.152	0.861	0.152	0.885	0.152	0.905	0.152	0.7	0.64	0.42	0.45	0.08	0.25	0.3	0.25	0.11	0.09
CG15431	2104420181	154	ser	Dict	0.5816				0.11	0.78	0.3	0.27	0.16	0.893	0.688	0.842	0.31	0.879	0.621	0.905	0.793	0.918	0.869	0.4217	1.04523	0.876	0.152	0.833	0.152	0.868	0.152	0.891	0.152	0.919	0.152	0.69	0.66	0.2	0.16	0.36	0.45	0.2	0.11	0.1	0.06
CG15431	2104418704	152	ser	Dict	0.5542				0.11	0.78	0.3	0.27	0.16	0.893	0.688	0.842	0.31	0.879	0.621	0.905	0.793	0.918	0.869	0.4217	0.460438	0.876	0.152	0.833	0.152	0.868	0.152	0.891	0.152	0.919	0.152	0.69	0.66	0.2	0.16	0.36	0.45	0.2	0.11	0.1	0.06
CG15431	2104418704	152	stg	Dict	0.7343		*		0.25	0.54	0.35	0.48	0.09	0.864	0.657	0.816	0.263	0.854	0.585	0.882	0.756	0.884	0.858	1.0297	0.460438	0.866	0.152	0.81	0.152	0.852	0.152	0.889	0.152	0.914	0.152	0.63	0.59	0.01	0.07	0.07	0.06	0.41	0.44	0.37	0.33
CG15431	2104420181	154	tai	Dict	0.5723				0.71	0.17	0.56	0.09	0.01	0.894	0.73	0.862	0.338	0.889	0.654	0.907	0.805	0.908	0.848	0.4654	1.04523	0.899	0.152	0.868	0.152	0.893	0.152	0.908	0.152	0.921	0.152	0	0.07	0.78	0.84	0.33	0.1	0.31	0.32	0.15	0.14
CG15431	2104418704	152	tx	Dict	0.5789				0.06	0.74	0.53	0.01	0.18	0.914	0.73	0.868	0.33	0.9	0.655	0.928	0.801	0.928	0.839	0.9684	0.460438	0.903	0.152	0.866	0.152	0.895	0.152	0.917	0.152	0.929	0.152	0.74	0.75	0.23	0.15	0.01	0.04	0.43	0.45	0.19	0.2
CG15431	2104420181	154	ubx	Dict	0.7903		*		0.45	0.7	0.38	0.06	0.15	0.916	0.737	0.881	0.325	0.908	0.669	0.924	0.823	0.952	0.891	0.6049	1.04523	0.91	0.152	0.876	0.152	0.902	0.152	0.929	0.152	0.943	0.152	0.74	0.7	0.38	0.42	0.12	0.27	0.29	0.22	0.23	0.25
CG15431	2104418704	152	ubx	Dict	0.6066				0.45	0.7	0.38	0.06	0.15	0.916	0.737	0.881	0.325	0.908	0.669	0.924	0.823	0.952	0.891	0.6049	0.460438	0.91	0.152	0.876	0.152	0.902	0.152	0.929	0.152	0.943	0.152	0.74	0.7	0.38	0.42	0.12	0.27	0.29	0.22	0.23	0.25
CG15431	2104418704	152	vn	Dict	0.5028				0.07	0.55	0.02	0.2	0.09	0.774	0.525	0.715	0.229	0.762	0.472	0.814	0.609	0.817	0.672	1.2207	0.460438	0.762	0.152	0.696	0.152	0.746	0.152	0.799	0.152	0.855	0.152	0.46	0.41	0.22	0.15	0.38	0.43	0.37	0.4	0.27	0.29
CG15431	2104418704	152	wts	Dict	0.6255				0.36	0.69	0.38	0.08	0.22	0.894	0.718	0.857	0.324	0.886	0.645	0.917	0.809	0.926	0.882	0.9344	0.460438	0.887	0.152	0.845	0.152	0.877	0.152	0.901	0.152	0.918	0.152	0.79	0.77	0.09	0.2	0.16	0.12	0.41	0.42	0.22	0.24
CG15472	1004652349	14	d	Dict	0.5148		*		0.16	0.46	0.09	0.05	0.56	0.732	0.49	0.664	0.199	0.718	0.433	0.759	0.581	0.795	0.674	0.2325	0.275602	0.728	0.152	0.67	0.152	0.715	0.152	0.75	0.152	0.79	0.152	0.42	0.39	0.05	0.02	0.29	0.29	0.05	0.03	0.37	0.4
CG15472	1004652349	14	ds	Dict	0.5577				0.39	0.84	0.12	0.23	0.09	0.937	0.759	0.903	0.356	0.929	0.684	0.943	0.852	0.947	0.903	5.7655	0.275602	0.932	0.152	0.898	0.152	0.925	0.152	0.944	0.152	0.956	0.152	0.89	0.85	0.21	0.26	0.14	0.21	0.26	0.31	0.22	0.21
CG15472	1004652349	14	fj	Dict	0.6478				0.84	0.35	0.16	0.16	0.06	0.938	0.763	0.909	0.355	0.932	0.705	0.952	0.857	0.956	0.929	2.0627	0.275602	0.928	0.152	0.894	0.152	0.921	0.152	0.941	0.152	0.953	0.152	0.59	0.54	0.46	0.61	0.39	0.27	0.29	0.29	0.37	0.34
CG15472	1004652349	14	ft	Dict	0.5308				0.39	0.75	0.08	0.35	0.1	0.927	0.72	0.889	0.323	0.919	0.649	0.933	0.808	0.941	0.888	4.3023	0.275602	0.916	0.152	0.877	0.152	0.907	0.152	0.938	0.152	0.95	0.152	0.77	0.7	0.42	0.43	0.25	0.36	0.22	0.28	0.21	0.2
CG15472	1004652349	14	kn	Dict	0.5913				0.64	0.28	0.11	0.11	0.28	0.824	0.637	0.777	0.296	0.81	0.565	0.844	0.703	0.867	0.779	0.3931	0.275602	0.815	0.152	0.763	0.152	0.803	0.152	0.833	0.152	0.858	0.152	0.43	0.39	0.35	0.43	0.14	0.05	0.01	0.04	0.51	0.51
CG15472	1004652349	14	mats	Dict	0.5507				0.58	0.58	0.2	0.15	0.19	0.892	0.685	0.853	0.318	0.882	0.628	0.899	0.766	0.9	0.866	3.5887	0.275602	0.884	0.152	0.843	0.152	0.875	0.152	0.897	0.152	0.918	0.152	0.72	0.65	0.54	0.62	0.07	0.12	0.01	0.04	0.07	0.04
CG15472	1004652349	14	s6k	Dict	0.7017		**		0.41	0.16	0.42	0.15	0.43	0.797	0.575	0.75	0.247	0.785	0.514	0.818	0.673	0.836	0.777	0.3905	0.275602	0.79	0.152	0.728	0.152	0.774	0.152	0.814	0.152	0.852	0.152	0.22	0.16	0.48	0.46	0.17	0.29	0.14	0.09	0.47	0.48
CG15472	1004652349	14	sd	Dict	0.6023				0.34	0.63	0.37	0.24	0.02	0.856	0.667	0.823	0.286	0.851	0.597	0.87	0.767	0.871	0.849	5.3633	0.275602	0.87	0.152	0.824	0.152	0.861	0.152	0.885	0.152	0.905	0.152	0.7	0.64	0.42	0.45	0.08	0.25	0.3	0.25	0.11	0.09
CG15472	1004652349	14	ser	Dict	0.5449				0.11	0.78	0.3	0.27	0.16	0.893	0.688	0.842	0.31	0.879	0.621	0.905	0.793	0.918	0.869	0.4217	0.275602	0.876	0.152	0.833	0.152	0.868	0.152	0.891	0.152	0.919	0.152	0.69	0.66	0.2	0.16	0.36	0.45	0.2	0.11	0.1	0.06
CG15472	1004652349	14	ubx	Dict	0.6353				0.45	0.7	0.38	0.06	0.15	0.916	0.737	0.881	0.325	0.908	0.669	0.924	0.823	0.952	0.891	0.6049	0.275602	0.91	0.152	0.876	0.152	0.902	0.152	0.929	0.152	0.943	0.152	0.74	0.7	0.38	0.42	0.12	0.27	0.29	0.22	0.23	0.25
CG15475	2120612339	286	brk	Dict	0.7059				0.23	0.77	0.25	0.5	0.11	0.919	0.718	0.886	0.323	0.914	0.651	0.937	0.802	0.946	0.885	2.1159	0.330295	0.925	0.152	0.883	0.152	0.916	0.152	0.939	0.152	0.957	0.152	0.69	0.71	0.37	0.36	0.24	0.17	0.03	0.08	0.36	0.33
CG15475	2120612339	286	bx	Dict	0.5636				0.2	0.83	0.2	0.29	0.05	0.899	0.714	0.867	0.309	0.895	0.651	0.907	0.792	0.914	0.858	1.1999	0.330295	0.901	0.152	0.863	0.152	0.894	0.152	0.918	0.152	0.934	0.152	0.79	0.8	0.29	0.26	0.25	0.22	0.02	0.06	0.34	0.32
CG15475	2120612339	286	cyce	Dict	0.8004		**		0.06	0.47	0.74	0.25	0.09	0.906	0.718	0.874	0.309	0.899	0.652	0.925	0.798	0.928	0.888	0.9349	0.330295	0.901	0.152	0.857	0.152	0.891	0.152	0.92	0.152	0.936	0.152	0.46	0.5	0.47	0.39	0.06	0.21	0.54	0.55	0.2	0.19
CG15475	2120612339	286	ex	Dict	0.5755				0.04	0.82	0.43	0.12	0.04	0.914	0.73	0.883	0.322	0.91	0.661	0.92	0.832	0.947	0.875	5.4462	0.330295	0.918	0.152	0.88	0.152	0.909	0.152	0.929	0.152	0.944	0.152	0.82	0.81	0.21	0.17	0.21	0.15	0.42	0.47	0.01	0.01
CG15475	2120612339	286	hpo	Dict	0.5171				0.4	0.22	0.22	0.18	0.14	0.782	0.521	0.706	0.219	0.762	0.468	0.822	0.631	0.829	0.822	0.3556	0.330295	0.755	0.152	0.68	0.152	0.736	0.152	0.794	0.152	0.822	0.152	0.33	0.33	0.09	0.2	0.34	0.31	0.21	0.19	0.06	0.07
CG15475	2120612339	286	inr	Dict	0.5589				0.32	0.49	0.12	0.08	0.29	0.794	0.561	0.744	0.24	0.782	0.496	0.807	0.653	0.838	0.701	0.5695	0.330295	0.795	0.152	0.731	0.152	0.778	0.152	0.824	0.152	0.855	0.152	0.33	0.36	0.37	0.42	0.41	0.3	0.06	0.11	0.09	0.12
CG15475	2120612339	286	nmo	Dict	0.6676				0.31	0.81	0.35	0.29	0.15	0.94	0.734	0.907	0.346	0.934	0.656	0.96	0.831	0.961	0.909	2.0873	0.330295	0.938	0.152	0.902	0.152	0.931	0.152	0.953	0.152	0.963	0.152	0.92	0.92	0.07	0.06	0.16	0.13	0.17	0.2	0.2	0.2
CG15475	2120612339	286	tmod	Dict	0.5983		*		0.2	0.49	0.1	0.6	0.13	0.821	0.592	0.765	0.243	0.814	0.518	0.84	0.668	0.868	0.753	0.6584	0.330295	0.822	0.152	0.761	0.152	0.81	0.152	0.852	0.152	0.876	0.152	0.57	0.56	0.02	0.09	0.05	0.01	0.01	0.04	0.36	0.34
CG15475	2120612339	286	tx	Dict	0.5659				0.06	0.74	0.53	0.01	0.18	0.914	0.73	0.868	0.33	0.9	0.655	0.928	0.801	0.928	0.839	0.9684	0.330295	0.903	0.152	0.866	0.152	0.895	0.152	0.917	0.152	0.929	0.152	0.74	0.75	0.23	0.15	0.01	0.04	0.43	0.45	0.19	0.2
CG15475	2120612339	286	wts	Dict	0.5343				0.36	0.69	0.38	0.08	0.22	0.894	0.718	0.857	0.324	0.886	0.645	0.917	0.809	0.926	0.882	0.9344	0.330295	0.887	0.152	0.845	0.152	0.877	0.152	0.901	0.152	0.918	0.152	0.79	0.77	0.09	0.2	0.16	0.12	0.41	0.42	0.22	0.24
CG15564	3227060351	935	ap	Dict	0.7076		*		0.13	0.81	0.11	0.15	0.22	0.856	0.666	0.815	0.299	0.847	0.607	0.87	0.745	0.871	0.826	0.394	0.164213	0.86	0.152	0.82	0.152	0.852	0.152	0.875	0.152	0.892	0.152	0.74	0.76	0.27	0.23	0.17	0.16	0.1	0.06	0.21	0.18
CG15564	3227060351	935	brk	Dict	0.7548		*		0.23	0.77	0.25	0.5	0.11	0.919	0.718	0.886	0.323	0.914	0.651	0.937	0.802	0.946	0.885	2.1159	0.164213	0.925	0.152	0.883	0.152	0.916	0.152	0.939	0.152	0.957	0.152	0.69	0.71	0.37	0.36	0.24	0.17	0.03	0.08	0.36	0.33
CG15564	3227060351	935	bun	Dict	0.7357		*		0.18	0.78	0.06	0.17	0.19	0.885	0.664	0.841	0.31	0.875	0.609	0.91	0.742	0.935	0.885	0.7822	0.164213	0.887	0.152	0.834	0.152	0.874	0.152	0.905	0.152	0.925	0.152	0.54	0.52	0.04	0.14	0.61	0.58	0.13	0.22	0.05	0.09
CG15564	3227060351	935	bx	Dict	0.7495		*		0.2	0.83	0.2	0.29	0.05	0.899	0.714	0.867	0.309	0.895	0.651	0.907	0.792	0.914	0.858	1.1999	0.164213	0.901	0.152	0.863	0.152	0.894	0.152	0.918	0.152	0.934	0.152	0.79	0.8	0.29	0.26	0.25	0.22	0.02	0.06	0.34	0.32
CG15564	3227060351	935	cg33299	Dict	0.5019		*		0.12	0.4	0.25	0.04	0.13	0.694	0.445	0.623	0.173	0.677	0.379	0.725	0.555	0.757	0.669	0.2309	0.164213	0.674	0.152	0.605	0.152	0.658	0.152	0.702	0.152	0.723	0.152	0.38	0.36	0.07	0.06	0.21	0.25	0.26	0.2	0.16	0.19
CG15564	3227060351	935	d	Dict	0.5659		*		0.16	0.46	0.09	0.05	0.56	0.732	0.49	0.664	0.199	0.718	0.433	0.759	0.581	0.795	0.674	0.2325	0.164213	0.728	0.152	0.67	0.152	0.715	0.152	0.75	0.152	0.79	0.152	0.42	0.39	0.05	0.02	0.29	0.29	0.05	0.03	0.37	0.4
CG15564	3227060351	935	dgo	Dict	0.5274				0.31	0.6	0.04	0.22	0.16	0.815	0.614	0.762	0.276	0.801	0.553	0.832	0.684	0.856	0.801	0.4284	0.164213	0.789	0.152	0.742	0.152	0.777	0.152	0.819	0.152	0.84	0.152	0.66	0.61	0.24	0.26	0.17	0.23	0.22	0.26	0.23	0.21
CG15564	3227060351	935	dll	Dict	0.7348		*		0.22	0.84	0.07	0.09	0.13	0.893	0.691	0.855	0.319	0.882	0.626	0.902	0.775	0.916	0.881	0.8412	0.164213	0.894	0.152	0.854	0.152	0.885	0.152	0.911	0.152	0.924	0.152	0.68	0.66	0.07	0.15	0.59	0.59	0.03	0.11	0.06	0.04
CG15564	3227060351	935	dlp	Dict	0.6402		*		0.22	0.56	0.21	0.39	0.18	0.845	0.586	0.784	0.258	0.829	0.528	0.86	0.691	0.881	0.769	0.9958	0.164213	0.815	0.152	0.755	0.152	0.8	0.152	0.84	0.152	0.86	0.152	0.56	0.54	0.26	0.3	0.02	0.14	0.16	0.13	0.33	0.32
CG15564	3227060351	935	dpp	Dict	0.5695				0.44	0.75	0.19	0.01	0.02	0.891	0.7	0.852	0.316	0.883	0.644	0.907	0.794	0.913	0.856	0.4649	0.164213	0.891	0.152	0.853	0.152	0.884	0.152	0.902	0.152	0.92	0.152	0.58	0.59	0.35	0.4	0.49	0.42	0.15	0.2	0.22	0.21
CG15564	3227060351	935	ds	Dict	0.7661		*		0.39	0.84	0.12	0.23	0.09	0.937	0.759	0.903	0.356	0.929	0.684	0.943	0.852	0.947	0.903	5.7655	0.164213	0.932	0.152	0.898	0.152	0.925	0.152	0.944	0.152	0.956	0.152	0.89	0.85	0.21	0.26	0.14	0.21	0.26	0.31	0.22	0.21
CG15564	3227060351	935	ex	Dict	0.7049				0.04	0.82	0.43	0.12	0.04	0.914	0.73	0.883	0.322	0.91	0.661	0.92	0.832	0.947	0.875	5.4462	0.164213	0.918	0.152	0.88	0.152	0.909	0.152	0.929	0.152	0.944	0.152	0.82	0.81	0.21	0.17	0.21	0.15	0.42	0.47	0.01	0.01
CG15564	3227060745	934	ex	Dict	0.6336				0.04	0.82	0.43	0.12	0.04	0.914	0.73	0.883	0.322	0.91	0.661	0.92	0.832	0.947	0.875	5.4462	0.0276773	0.918	0.152	0.88	0.152	0.909	0.152	0.929	0.152	0.944	0.152	0.82	0.81	0.21	0.17	0.21	0.15	0.42	0.47	0.01	0.01
CG15564	3227060351	935	ft	Dict	0.6885				0.39	0.75	0.08	0.35	0.1	0.927	0.72	0.889	0.323	0.919	0.649	0.933	0.808	0.941	0.888	4.3023	0.164213	0.916	0.152	0.877	0.152	0.907	0.152	0.938	0.152	0.95	0.152	0.77	0.7	0.42	0.43	0.25	0.36	0.22	0.28	0.21	0.2
CG15564	3227060351	935	fz	Dict	0.6234				0.06	0.7	0.17	0.26	0.24	0.85	0.643	0.804	0.281	0.839	0.574	0.861	0.74	0.866	0.798	0.4509	0.164213	0.841	0.152	0.79	0.152	0.826	0.152	0.861	0.152	0.882	0.152	0.77	0.78	0.15	0.08	0.06	0.08	0.02	0.03	0.39	0.4
CG15564	3227060745	934	hh	Dict	0.5388		*		0.06	0.4	0.21	0.41	0.25	0.803	0.507	0.73	0.204	0.783	0.439	0.832	0.587	0.842	0.718	1.466	0.0276773	0.792	0.152	0.721	0.152	0.776	0.152	0.828	0.152	0.888	0.152	0.37	0.39	0.3	0.3	0.25	0.15	0.14	0.17	0.55	0.54
CG15564	3227060351	935	kay	Dict	0.5575				0.28	0.64	0.08	0.07	0.3	0.825	0.609	0.772	0.243	0.814	0.538	0.851	0.678	0.862	0.785	0.4534	0.164213	0.821	0.152	0.767	0.152	0.806	0.152	0.839	0.152	0.857	0.152	0.47	0.49	0.19	0.23	0.32	0.32	0.18	0.13	0.28	0.24
CG15564	3227060351	935	lea	Dict	0.5068		*		0.06	0.56	0.09	0.04	0.24	0.714	0.505	0.665	0.233	0.706	0.452	0.734	0.592	0.736	0.647	0.2912	0.164213	0.723	0.152	0.659	0.152	0.704	0.152	0.756	0.152	0.813	0.152	0.53	0.51	0.06	0.06	0.18	0.24	0.1	0.06	0.28	0.28
CG15564	3227060351	935	luna	Dict	0.7662		**		0.18	0.75	0.2	0.38	0.08	0.869	0.647	0.82	0.292	0.86	0.599	0.88	0.733	0.882	0.805	0.3695	0.164213	0.861	0.152	0.819	0.152	0.852	0.152	0.879	0.152	0.903	0.152	0.62	0.62	0.08	0.12	0.38	0.41	0.28	0.2	0.3	0.25
CG15564	3227060351	935	mats	Dict	0.55				0.58	0.58	0.2	0.15	0.19	0.892	0.685	0.853	0.318	0.882	0.628	0.899	0.766	0.9	0.866	3.5887	0.164213	0.884	0.152	0.843	0.152	0.875	0.152	0.897	0.152	0.918	0.152	0.72	0.65	0.54	0.62	0.07	0.12	0.01	0.04	0.07	0.04
CG15564	3227060351	935	med	Dict	0.7216		**		0.17	0.63	0.24	0.37	0.19	0.855	0.625	0.8	0.281	0.843	0.558	0.875	0.718	0.896	0.847	0.768	0.164213	0.84	0.152	0.789	0.152	0.828	0.152	0.862	0.152	0.893	0.152	0.54	0.51	0.21	0.19	0.24	0.32	0.14	0.06	0.15	0.1
CG15564	3227060351	935	mpk2	Dict	0.6097				0.18	0.68	0.09	0.37	0.15	0.846	0.633	0.806	0.278	0.839	0.57	0.862	0.742	0.889	0.829	0.4463	0.164213	0.849	0.152	0.797	0.152	0.837	0.152	0.878	0.152	0.903	0.152	0.61	0.59	0.05	0.06	0.23	0.26	0.05	0.09	0.59	0.58
CG15564	3227060351	935	nmo	Dict	0.7799		*		0.31	0.81	0.35	0.29	0.15	0.94	0.734	0.907	0.346	0.934	0.656	0.96	0.831	0.961	0.909	2.0873	0.164213	0.938	0.152	0.902	0.152	0.931	0.152	0.953	0.152	0.963	0.152	0.92	0.92	0.07	0.06	0.16	0.13	0.17	0.2	0.2	0.2
CG15564	3227060745	934	os	Dict	0.5056				0.36	0.12	0.65	0.28	0	0.816	0.603	0.775	0.255	0.808	0.547	0.844	0.699	0.858	0.789	0.2858	0.0276773	0.823	0.152	0.777	0.152	0.814	0.152	0.838	0.152	0.855	0.152	0.09	0.09	0.09	0.04	0.44	0.5	0.58	0.54	0.23	0.18
CG15564	3227060351	935	pnt	Dict	0.7443		*		0.28	0.69	0.03	0.39	0.09	0.858	0.653	0.816	0.281	0.853	0.584	0.873	0.772	0.886	0.829	0.9325	0.164213	0.843	0.152	0.802	0.152	0.836	0.152	0.865	0.152	0.891	0.152	0.52	0.53	0.21	0.26	0.4	0.37	0.11	0.04	0.34	0.29
CG15564	3227060745	934	rho	Dict	0.6069				0.42	0.64	0.27	0.24	0.06	0.883	0.676	0.842	0.302	0.873	0.632	0.896	0.784	0.901	0.867	0.6139	0.0276773	0.882	0.152	0.835	0.152	0.87	0.152	0.895	0.152	0.913	0.152	0.45	0.44	0.28	0.37	0.56	0.47	0.39	0.44	0.18	0.17
CG15564	3227060351	935	sav	Dict	0.6358				0.34	0.81	0.01	0.18	0.13	0.914	0.732	0.873	0.328	0.904	0.656	0.928	0.795	0.931	0.931	0.5947	0.164213	0.909	0.152	0.868	0.152	0.902	0.152	0.929	0.152	0.952	0.152	0.58	0.56	0.05	0.15	0.59	0.59	0.16	0.23	0.3	0.28
CG15564	3227060351	935	sd	Dict	0.6427				0.34	0.63	0.37	0.24	0.02	0.856	0.667	0.823	0.286	0.851	0.597	0.87	0.767	0.871	0.849	5.3633	0.164213	0.87	0.152	0.824	0.152	0.861	0.152	0.885	0.152	0.905	0.152	0.7	0.64	0.42	0.45	0.08	0.25	0.3	0.25	0.11	0.09
CG15564	3227060351	935	ser	Dict	0.8362		**		0.11	0.78	0.3	0.27	0.16	0.893	0.688	0.842	0.31	0.879	0.621	0.905	0.793	0.918	0.869	0.4217	0.164213	0.876	0.152	0.833	0.152	0.868	0.152	0.891	0.152	0.919	0.152	0.69	0.66	0.2	0.16	0.36	0.45	0.2	0.11	0.1	0.06
CG15564	3227060745	934	stan	Dict	0.5447				0.2	0.44	0.52	0.16	0.03	0.797	0.577	0.744	0.261	0.787	0.515	0.815	0.663	0.834	0.797	0.2999	0.0276773	0.795	0.152	0.741	0.152	0.785	0.152	0.827	0.152	0.875	0.152	0.48	0.46	0.11	0.04	0.08	0.12	0.49	0.5	0.04	0.02
CG15564	3227060745	934	stg	Dict	0.6894		*		0.25	0.54	0.35	0.48	0.09	0.864	0.657	0.816	0.263	0.854	0.585	0.882	0.756	0.884	0.858	1.0297	0.0276773	0.866	0.152	0.81	0.152	0.852	0.152	0.889	0.152	0.914	0.152	0.63	0.59	0.01	0.07	0.07	0.06	0.41	0.44	0.37	0.33
CG15564	3227060351	935	tmod	Dict	0.6134		*		0.2	0.49	0.1	0.6	0.13	0.821	0.592	0.765	0.243	0.814	0.518	0.84	0.668	0.868	0.753	0.6584	0.164213	0.822	0.152	0.761	0.152	0.81	0.152	0.852	0.152	0.876	0.152	0.57	0.56	0.02	0.09	0.05	0.01	0.01	0.04	0.36	0.34
CG15564	3227060351	935	tx	Dict	0.6603				0.06	0.74	0.53	0.01	0.18	0.914	0.73	0.868	0.33	0.9	0.655	0.928	0.801	0.928	0.839	0.9684	0.164213	0.903	0.152	0.866	0.152	0.895	0.152	0.917	0.152	0.929	0.152	0.74	0.75	0.23	0.15	0.01	0.04	0.43	0.45	0.19	0.2
CG15564	3227060745	934	tx	Dict	0.5308				0.06	0.74	0.53	0.01	0.18	0.914	0.73	0.868	0.33	0.9	0.655	0.928	0.801	0.928	0.839	0.9684	0.0276773	0.903	0.152	0.866	0.152	0.895	0.152	0.917	0.152	0.929	0.152	0.74	0.75	0.23	0.15	0.01	0.04	0.43	0.45	0.19	0.2
CG15564	3227060351	935	ubx	Dict	0.7966		*		0.45	0.7	0.38	0.06	0.15	0.916	0.737	0.881	0.325	0.908	0.669	0.924	0.823	0.952	0.891	0.6049	0.164213	0.91	0.152	0.876	0.152	0.902	0.152	0.929	0.152	0.943	0.152	0.74	0.7	0.38	0.42	0.12	0.27	0.29	0.22	0.23	0.25
CG15564	3227060351	935	wg	Dict	0.5445				0.35	0.58	0.01	0.12	0.19	0.778	0.575	0.724	0.25	0.762	0.522	0.796	0.661	0.804	0.737	1.6659	0.164213	0.776	0.152	0.726	0.152	0.764	0.152	0.798	0.152	0.846	0.152	0.62	0.59	0.24	0.31	0.06	0.04	0.13	0.15	0.18	0.17
CG15564	3227060351	935	wts	Dict	0.6161				0.36	0.69	0.38	0.08	0.22	0.894	0.718	0.857	0.324	0.886	0.645	0.917	0.809	0.926	0.882	0.9344	0.164213	0.887	0.152	0.845	0.152	0.877	0.152	0.901	0.152	0.918	0.152	0.79	0.77	0.09	0.2	0.16	0.12	0.41	0.42	0.22	0.24
CG15611	2213000811	382	aret	Dict	0.5935				0.66	0.06	0.37	0.12	0	0.844	0.652	0.797	0.293	0.836	0.595	0.861	0.737	0.868	0.861	0.4688	0.334137	0.843	0.152	0.795	0.152	0.833	0.152	0.863	0.152	0.885	0.152	0.22	0.23	0.02	0.18	0.65	0.65	0.14	0.1	0.52	0.5
CG15611	2213000811	382	bun	Dict	0.5522				0.18	0.78	0.06	0.17	0.19	0.885	0.664	0.841	0.31	0.875	0.609	0.91	0.742	0.935	0.885	0.7822	0.334137	0.887	0.152	0.834	0.152	0.874	0.152	0.905	0.152	0.925	0.152	0.54	0.52	0.04	0.14	0.61	0.58	0.13	0.22	0.05	0.09
CG15611	2213000811	382	dad	Dict	0.7998		**		0.6	0.35	0.36	0.11	0.33	0.869	0.651	0.825	0.301	0.858	0.591	0.884	0.743	0.901	0.864	0.3276	0.334137	0.857	0.152	0.812	0.152	0.849	0.152	0.877	0.152	0.897	0.152	0.02	0.03	0.18	0.36	0.74	0.69	0.29	0.21	0.1	0.04
CG15611	2213000811	382	dll	Dict	0.6299				0.22	0.84	0.07	0.09	0.13	0.893	0.691	0.855	0.319	0.882	0.626	0.902	0.775	0.916	0.881	0.8412	0.334137	0.894	0.152	0.854	0.152	0.885	0.152	0.911	0.152	0.924	0.152	0.68	0.66	0.07	0.15	0.59	0.59	0.03	0.11	0.06	0.04
CG15611	2213000811	382	egfr	Dict	0.5284				0.7	0.16	0.09	0.25	0.03	0.856	0.625	0.805	0.283	0.849	0.568	0.871	0.727	0.881	0.797	0.9394	0.334137	0.846	0.152	0.794	0.152	0.834	0.152	0.864	0.152	0.892	0.152	0.11	0.12	0.18	0.37	0.69	0.62	0.11	0.15	0.33	0.32
CG15611	2213000811	382	luna	Dict	0.5469				0.18	0.75	0.2	0.38	0.08	0.869	0.647	0.82	0.292	0.86	0.599	0.88	0.733	0.882	0.805	0.3695	0.334137	0.861	0.152	0.819	0.152	0.852	0.152	0.879	0.152	0.903	0.152	0.62	0.62	0.08	0.12	0.38	0.41	0.28	0.2	0.3	0.25
CG15611	2213000811	382	mad	Dict	0.5864				0.84	0.08	0.2	0.2	0.07	0.894	0.724	0.866	0.359	0.887	0.661	0.91	0.811	0.922	0.847	0.5446	0.334137	0.889	0.152	0.854	0.152	0.881	0.152	0.901	0.152	0.907	0.152	0.2	0.16	0.38	0.54	0.57	0.49	0.28	0.25	0.5	0.46
CG15611	2213000811	382	os	Dict	0.5062				0.36	0.12	0.65	0.28	0	0.816	0.603	0.775	0.255	0.808	0.547	0.844	0.699	0.858	0.789	0.2858	0.334137	0.823	0.152	0.777	0.152	0.814	0.152	0.838	0.152	0.855	0.152	0.09	0.09	0.09	0.04	0.44	0.5	0.58	0.54	0.23	0.18
CG15611	2213000811	382	ptc	Dict	0.6339		*		0.6	0.19	0.19	0.05	0.47	0.847	0.608	0.783	0.28	0.832	0.556	0.855	0.7	0.862	0.784	1.9546	0.334137	0.831	0.152	0.769	0.152	0.813	0.152	0.863	0.152	0.884	0.152	0.46	0.46	0.19	0.39	0.58	0.48	0.06	0.01	0.05	0.01
CG15611	2213000811	382	sav	Dict	0.555				0.34	0.81	0.01	0.18	0.13	0.914	0.732	0.873	0.328	0.904	0.656	0.928	0.795	0.931	0.931	0.5947	0.334137	0.909	0.152	0.868	0.152	0.902	0.152	0.929	0.152	0.952	0.152	0.58	0.56	0.05	0.15	0.59	0.59	0.16	0.23	0.3	0.28
CG15611	2213000811	382	sd	Muta	0.5564				0.58	0.16	0.17	0.41	0.11	0.76	0.568	0.706	0.264	0.746	0.497	0.791	0.631	0.798	0.704	0.009	0.334137	0.778	0.152	0.726	0.152	0.767	0.152	0.799	0.152	0.844	0.152	0.13	0.14	0.1	0.29	0.69	0.63	0.11	0.16	0.02	0.04
CG15611	2213000811	382	ser	Dict	0.5022				0.11	0.78	0.3	0.27	0.16	0.893	0.688	0.842	0.31	0.879	0.621	0.905	0.793	0.918	0.869	0.4217	0.334137	0.876	0.152	0.833	0.152	0.868	0.152	0.891	0.152	0.919	0.152	0.69	0.66	0.2	0.16	0.36	0.45	0.2	0.11	0.1	0.06
CG15611	2213000811	382	sls	Dict	0.6432				0.72	0.33	0.05	0.14	0.22	0.84	0.68	0.801	0.314	0.832	0.622	0.857	0.744	0.874	0.801	0.5182	0.334137	0.839	0.152	0.799	0.152	0.832	0.152	0.859	0.152	0.883	0.152	0.03	0.07	0.46	0.61	0.64	0.52	0.12	0.06	0.21	0.16
CG15611	2213000811	382	socs36e	Dict	0.6241				0.74	0.08	0.47	0.09	0.11	0.886	0.717	0.854	0.333	0.88	0.654	0.898	0.808	0.901	0.891	0.4292	0.334137	0.88	0.152	0.846	0.152	0.872	0.152	0.895	0.152	0.911	0.152	0.19	0.17	0.15	0.33	0.64	0.63	0.43	0.39	0.26	0.24
CG15611	2213000811	382	sog	Dict	0.5854				0.53	0.17	0.36	0.18	0.04	0.794	0.601	0.737	0.279	0.78	0.545	0.816	0.693	0.827	0.806	0.8503	0.334137	0.793	0.152	0.735	0.152	0.778	0.152	0.817	0.152	0.858	0.152	0.13	0.17	0.18	0.03	0.7	0.73	0.04	0.09	0.43	0.41
CG15611	2213000811	382	tango14	Dict	0.6753				0.87	0.17	0.08	0.09	0.3	0.899	0.736	0.871	0.356	0.894	0.669	0.914	0.821	0.916	0.86	1.4426	0.334137	0.909	0.152	0.875	0.152	0.902	0.152	0.923	0.152	0.932	0.152	0.16	0.13	0.48	0.67	0.77	0.62	0.08	0.02	0.09	0.05
CG15611	2213000811	382	trh	Dict	0.5174				0.53	0.15	0.11	0.12	0.43	0.775	0.527	0.711	0.231	0.758	0.467	0.81	0.62	0.815	0.708	0.8179	0.334137	0.778	0.152	0.714	0.152	0.764	0.152	0.808	0.152	0.854	0.152	0.09	0.08	0.37	0.52	0.61	0.45	0.21	0.27	0.06	0.09
CG15649	2216860502	424	brk	Dict	0.6175				0.23	0.77	0.25	0.5	0.11	0.919	0.718	0.886	0.323	0.914	0.651	0.937	0.802	0.946	0.885	2.1159	0.739072	0.925	0.152	0.883	0.152	0.916	0.152	0.939	0.152	0.957	0.152	0.69	0.71	0.37	0.36	0.24	0.17	0.03	0.08	0.36	0.33
CG15649	2216860502	424	btd	Dict	0.6599				0.83	0.17	0.22	0.01	0.09	0.891	0.703	0.854	0.334	0.882	0.638	0.904	0.803	0.91	0.863	0.5246	0.739072	0.889	0.152	0.851	0.152	0.882	0.152	0.899	0.152	0.921	0.152	0.06	0.02	0.53	0.66	0.51	0.36	0.14	0.16	0.45	0.44
CG15649	2216860502	424	bx	Dict	0.5339				0.2	0.83	0.2	0.29	0.05	0.899	0.714	0.867	0.309	0.895	0.651	0.907	0.792	0.914	0.858	1.1999	0.739072	0.901	0.152	0.863	0.152	0.894	0.152	0.918	0.152	0.934	0.152	0.79	0.8	0.29	0.26	0.25	0.22	0.02	0.06	0.34	0.32
CG15649	2216860502	424	cg4267	Dict	0.5583				0.34	0.23	0.51	0.34	0.33	0.814	0.59	0.77	0.242	0.807	0.53	0.854	0.675	0.854	0.806	0.4521	0.739072	0.81	0.152	0.754	0.152	0.798	0.152	0.83	0.152	0.853	0.152	0.19	0.23	0.4	0.37	0.06	0.15	0.31	0.28	0.66	0.66
CG15649	2216860502	424	chn	Dict	0.673		*		0.57	0.17	0.13	0.45	0.34	0.826	0.601	0.773	0.271	0.817	0.544	0.858	0.702	0.881	0.766	0.9439	0.739072	0.824	0.152	0.768	0.152	0.81	0.152	0.847	0.152	0.865	0.152	0.02	0.02	0.44	0.53	0.4	0.27	0.03	0.06	0.35	0.31
CG15649	2216860502	424	ct	Muta	0.5811		*		0.54	0.02	0.38	0.03	0.09	0.705	0.538	0.664	0.253	0.701	0.484	0.718	0.607	0.733	0.65	0.0056	0.739072	0.715	0.152	0.672	0.152	0.705	0.152	0.731	0.152	0.766	0.152	0.12	0.08	0.47	0.51	0.18	0.03	0.25	0.22	0.25	0.27
CG15649	2216860502	424	cv2	Dict	0.558				0.56	0.49	0.08	0.38	0.25	0.87	0.685	0.828	0.295	0.86	0.6	0.893	0.763	0.898	0.844	0.5685	0.739072	0.859	0.152	0.814	0.152	0.85	0.152	0.878	0.152	0.914	0.152	0.31	0.35	0.38	0.43	0.3	0.25	0.13	0.11	0.62	0.59
CG15649	2216860502	424	cyce	Dict	0.7146				0.06	0.47	0.74	0.25	0.09	0.906	0.718	0.874	0.309	0.899	0.652	0.925	0.798	0.928	0.888	0.9349	0.739072	0.901	0.152	0.857	0.152	0.891	0.152	0.92	0.152	0.936	0.152	0.46	0.5	0.47	0.39	0.06	0.21	0.54	0.55	0.2	0.19
CG15649	2216860502	424	dally	Dict	0.765		*		0.64	0.29	0.47	0.31	0.12	0.906	0.705	0.866	0.306	0.895	0.649	0.919	0.783	0.941	0.845	0.8955	0.739072	0.912	0.152	0.867	0.152	0.901	0.152	0.928	0.152	0.935	0.152	0.18	0.23	0.62	0.64	0.21	0.06	0.18	0.18	0.57	0.56
CG15649	2216860502	424	dpp	Dict	0.5751				0.44	0.75	0.19	0.01	0.02	0.891	0.7	0.852	0.316	0.883	0.644	0.907	0.794	0.913	0.856	0.4649	0.739072	0.891	0.152	0.853	0.152	0.884	0.152	0.902	0.152	0.92	0.152	0.58	0.59	0.35	0.4	0.49	0.42	0.15	0.2	0.22	0.21
CG15649	2216860502	424	emc	Dict	0.5375				0.54	0.06	0.44	0.37	0.03	0.797	0.601	0.752	0.255	0.791	0.535	0.833	0.683	0.848	0.776	0.3552	0.739072	0.815	0.152	0.761	0.152	0.801	0.152	0.836	0.152	0.867	0.152	0.15	0.08	0.65	0.67	0.07	0.11	0.07	0.06	0.31	0.3
CG15649	2216860502	424	foxo	Dict	0.5461				0.34	0.29	0.45	0.29	0	0.752	0.553	0.703	0.242	0.741	0.489	0.775	0.636	0.778	0.742	0.2659	0.739072	0.751	0.152	0.698	0.152	0.739	0.152	0.775	0.152	0.79	0.152	0.2	0.25	0.53	0.51	0.07	0.07	0.17	0.18	0.3	0.28
CG15649	2216860502	424	inr	Dict	0.5652		*		0.32	0.49	0.12	0.08	0.29	0.794	0.561	0.744	0.24	0.782	0.496	0.807	0.653	0.838	0.701	0.5695	0.739072	0.795	0.152	0.731	0.152	0.778	0.152	0.824	0.152	0.855	0.152	0.33	0.36	0.37	0.42	0.41	0.3	0.06	0.11	0.09	0.12
CG15649	2216860502	424	neur	Dict	0.534				0.45	0.24	0.14	0.21	0.46	0.814	0.539	0.742	0.227	0.798	0.476	0.833	0.64	0.843	0.761	2.4309	0.739072	0.81	0.152	0.744	0.152	0.797	0.152	0.841	0.152	0.868	0.152	0.06	0.09	0.43	0.54	0.56	0.4	0.18	0.23	0.3	0.32
CG15649	2216860502	424	tai	Dict	0.7126				0.71	0.17	0.56	0.09	0.01	0.894	0.73	0.862	0.338	0.889	0.654	0.907	0.805	0.908	0.848	0.4654	0.739072	0.899	0.152	0.868	0.152	0.893	0.152	0.908	0.152	0.921	0.152	0	0.07	0.78	0.84	0.33	0.1	0.31	0.32	0.15	0.14
CG15649	2216860502	424	vg	Dict	0.5105		**		0.44	0.05	0.07	0.02	0	0.652	0.421	0.579	0.174	0.634	0.373	0.685	0.505	0.717	0.583	2.5051	0.739072	0.654	0.152	0.582	0.152	0.64	0.152	0.697	0.152	0.75	0.152	0.06	0.04	0.24	0.3	0.26	0.18	0.09	0.08	0.22	0.23
CG15760	1013564600	68	ds	Dict	0.5736				0.39	0.84	0.12	0.23	0.09	0.937	0.759	0.903	0.356	0.929	0.684	0.943	0.852	0.947	0.903	5.7655	0.176176	0.932	0.152	0.898	0.152	0.925	0.152	0.944	0.152	0.956	0.152	0.89	0.85	0.21	0.26	0.14	0.21	0.26	0.31	0.22	0.21
CG15760	1013564600	68	dsh	Dict	0.5711				0.68	0.51	0.24	0.14	0.1	0.91	0.72	0.873	0.33	0.9	0.649	0.92	0.793	0.934	0.84	1.1394	0.176176	0.91	0.152	0.871	0.152	0.9	0.152	0.923	0.152	0.937	0.152	0.68	0.66	0.19	0.35	0.33	0.27	0.26	0.26	0.32	0.3
CG15760	1013564600	68	fj	Dict	0.6413				0.84	0.35	0.16	0.16	0.06	0.938	0.763	0.909	0.355	0.932	0.705	0.952	0.857	0.956	0.929	2.0627	0.176176	0.928	0.152	0.894	0.152	0.921	0.152	0.941	0.152	0.953	0.152	0.59	0.54	0.46	0.61	0.39	0.27	0.29	0.29	0.37	0.34
CG15760	1013564600	68	ft	Dict	0.5548				0.39	0.75	0.08	0.35	0.1	0.927	0.72	0.889	0.323	0.919	0.649	0.933	0.808	0.941	0.888	4.3023	0.176176	0.916	0.152	0.877	0.152	0.907	0.152	0.938	0.152	0.95	0.152	0.77	0.7	0.42	0.43	0.25	0.36	0.22	0.28	0.21	0.2
CG15760	1013564600	68	inv	Dict	0.6652		**		0.21	0.21	0.49	0.43	0.37	0.794	0.541	0.743	0.234	0.786	0.48	0.811	0.656	0.863	0.766	0.3255	0.176176	0.798	0.152	0.739	0.152	0.786	0.152	0.826	0.152	0.867	0.152	0.3	0.27	0.03	0.1	0.19	0.2	0.61	0.57	0.04	0.1
CG15760	1013564600	68	mats	Dict	0.5867				0.58	0.58	0.2	0.15	0.19	0.892	0.685	0.853	0.318	0.882	0.628	0.899	0.766	0.9	0.866	3.5887	0.176176	0.884	0.152	0.843	0.152	0.875	0.152	0.897	0.152	0.918	0.152	0.72	0.65	0.54	0.62	0.07	0.12	0.01	0.04	0.07	0.04
CG15760	1013564600	68	nmo	Dict	0.601				0.31	0.81	0.35	0.29	0.15	0.94	0.734	0.907	0.346	0.934	0.656	0.96	0.831	0.961	0.909	2.0873	0.176176	0.938	0.152	0.902	0.152	0.931	0.152	0.953	0.152	0.963	0.152	0.92	0.92	0.07	0.06	0.16	0.13	0.17	0.2	0.2	0.2
CG15760	1013564600	68	os	Dict	0.5164				0.36	0.12	0.65	0.28	0	0.816	0.603	0.775	0.255	0.808	0.547	0.844	0.699	0.858	0.789	0.2858	0.176176	0.823	0.152	0.777	0.152	0.814	0.152	0.838	0.152	0.855	0.152	0.09	0.09	0.09	0.04	0.44	0.5	0.58	0.54	0.23	0.18
CG15760	1013564600	68	ptc	Dict	0.7041		**		0.6	0.19	0.19	0.05	0.47	0.847	0.608	0.783	0.28	0.832	0.556	0.855	0.7	0.862	0.784	1.9546	0.176176	0.831	0.152	0.769	0.152	0.813	0.152	0.863	0.152	0.884	0.152	0.46	0.46	0.19	0.39	0.58	0.48	0.06	0.01	0.05	0.01
CG15760	1013564600	68	spi	Dict	0.5081				0.23	0.37	0.57	0.11	0.37	0.827	0.601	0.778	0.242	0.821	0.54	0.837	0.698	0.84	0.809	0.4719	0.176176	0.83	0.152	0.779	0.152	0.818	0.152	0.856	0.152	0.893	0.152	0.4	0.43	0.43	0.36	0.07	0.16	0.33	0.31	0.43	0.45
CG15760	1013564600	68	stan	Dict	0.6341		*		0.2	0.44	0.52	0.16	0.03	0.797	0.577	0.744	0.261	0.787	0.515	0.815	0.663	0.834	0.797	0.2999	0.176176	0.795	0.152	0.741	0.152	0.785	0.152	0.827	0.152	0.875	0.152	0.48	0.46	0.11	0.04	0.08	0.12	0.49	0.5	0.04	0.02
CG15760	1013564600	68	stg	Dict	0.5855				0.25	0.54	0.35	0.48	0.09	0.864	0.657	0.816	0.263	0.854	0.585	0.882	0.756	0.884	0.858	1.0297	0.176176	0.866	0.152	0.81	0.152	0.852	0.152	0.889	0.152	0.914	0.152	0.63	0.59	0.01	0.07	0.07	0.06	0.41	0.44	0.37	0.33
CG15760	1013564600	68	tx	Dict	0.6049				0.06	0.74	0.53	0.01	0.18	0.914	0.73	0.868	0.33	0.9	0.655	0.928	0.801	0.928	0.839	0.9684	0.176176	0.903	0.152	0.866	0.152	0.895	0.152	0.917	0.152	0.929	0.152	0.74	0.75	0.23	0.15	0.01	0.04	0.43	0.45	0.19	0.2
CG15760	1013564600	68	vang	Dict	0.5079		*		0.2	0.01	0.23	0.3	0.66	0.779	0.47	0.703	0.168	0.763	0.403	0.809	0.59	0.814	0.721	0.3247	0.176176	0.763	0.152	0.688	0.152	0.745	0.152	0.799	0.152	0.832	0.152	0.18	0.18	0.04	0.15	0.4	0.36	0.18	0.1	0.11	0.17
CG15760	1013564600	68	wts	Dict	0.6738				0.36	0.69	0.38	0.08	0.22	0.894	0.718	0.857	0.324	0.886	0.645	0.917	0.809	0.926	0.882	0.9344	0.176176	0.887	0.152	0.845	0.152	0.877	0.152	0.901	0.152	0.918	0.152	0.79	0.77	0.09	0.2	0.16	0.12	0.41	0.42	0.22	0.24
CG1632	1008155558	42	bsk	Dict	0.5195				0.12	0.05	0.62	0.23	0.07	0.742	0.522	0.689	0.218	0.733	0.458	0.75	0.61	0.791	0.715	0.6289	0.546678	0.771	0.152	0.715	0.152	0.759	0.152	0.802	0.152	0.862	0.152	0.22	0.28	0.54	0.4	0.36	0.51	0.22	0.19	0.51	0.49
CG1632	1008155558	42	cyce	Dict	0.5914				0.06	0.47	0.74	0.25	0.09	0.906	0.718	0.874	0.309	0.899	0.652	0.925	0.798	0.928	0.888	0.9349	0.546678	0.901	0.152	0.857	0.152	0.891	0.152	0.92	0.152	0.936	0.152	0.46	0.5	0.47	0.39	0.06	0.21	0.54	0.55	0.2	0.19
CG1632	1008155558	42	dad	Dict	0.5916				0.6	0.35	0.36	0.11	0.33	0.869	0.651	0.825	0.301	0.858	0.591	0.884	0.743	0.901	0.864	0.3276	0.546678	0.857	0.152	0.812	0.152	0.849	0.152	0.877	0.152	0.897	0.152	0.02	0.03	0.18	0.36	0.74	0.69	0.29	0.21	0.1	0.04
CG1632	1008155558	42	inv	Dict	0.5208				0.21	0.21	0.49	0.43	0.37	0.794	0.541	0.743	0.234	0.786	0.48	0.811	0.656	0.863	0.766	0.3255	0.546678	0.798	0.152	0.739	0.152	0.786	0.152	0.826	0.152	0.867	0.152	0.3	0.27	0.03	0.1	0.19	0.2	0.61	0.57	0.04	0.1
CG1632	1008155558	42	os	Dict	0.7702		**		0.36	0.12	0.65	0.28	0	0.816	0.603	0.775	0.255	0.808	0.547	0.844	0.699	0.858	0.789	0.2858	0.546678	0.823	0.152	0.777	0.152	0.814	0.152	0.838	0.152	0.855	0.152	0.09	0.09	0.09	0.04	0.44	0.5	0.58	0.54	0.23	0.18
CG1632	1008155558	42	rpt1	Dict	0.644		**		0.04	0.25	0.66	0.15	0.07	0.793	0.555	0.721	0.245	0.77	0.503	0.816	0.623	0.817	0.725	0.264	0.546678	0.775	0.152	0.72	0.152	0.763	0.152	0.791	0.152	0.839	0.152	0.12	0.08	0.45	0.35	0.32	0.47	0.36	0.32	0.25	0.23
CG1632	1008155558	42	socs36e	Dict	0.6541				0.74	0.08	0.47	0.09	0.11	0.886	0.717	0.854	0.333	0.88	0.654	0.898	0.808	0.901	0.891	0.4292	0.546678	0.88	0.152	0.846	0.152	0.872	0.152	0.895	0.152	0.911	0.152	0.19	0.17	0.15	0.33	0.64	0.63	0.43	0.39	0.26	0.24
CG1632	1008155558	42	stan	Dict	0.5702				0.2	0.44	0.52	0.16	0.03	0.797	0.577	0.744	0.261	0.787	0.515	0.815	0.663	0.834	0.797	0.2999	0.546678	0.795	0.152	0.741	0.152	0.785	0.152	0.827	0.152	0.875	0.152	0.48	0.46	0.11	0.04	0.08	0.12	0.49	0.5	0.04	0.02
CG16800	2112959198	219	cg34394	Dict	0.514				0.47	0.1	0.1	0.25	0.48	0.803	0.521	0.728	0.219	0.777	0.464	0.823	0.611	0.862	0.716	2.1385	0.0575182	0.804	0.152	0.728	0.152	0.785	0.152	0.843	0.152	0.876	0.152	0.11	0.08	0.38	0.51	0.58	0.42	0.19	0.24	0.3	0.32
CG16800	2112959198	219	chn	Dict	0.5329				0.57	0.17	0.13	0.45	0.34	0.826	0.601	0.773	0.271	0.817	0.544	0.858	0.702	0.881	0.766	0.9439	0.0575182	0.824	0.152	0.768	0.152	0.81	0.152	0.847	0.152	0.865	0.152	0.02	0.02	0.44	0.53	0.4	0.27	0.03	0.06	0.35	0.31
CG16800	2112959198	219	emc	Dict	0.5913				0.54	0.06	0.44	0.37	0.03	0.797	0.601	0.752	0.255	0.791	0.535	0.833	0.683	0.848	0.776	0.3552	0.0575182	0.815	0.152	0.761	0.152	0.801	0.152	0.836	0.152	0.867	0.152	0.15	0.08	0.65	0.67	0.07	0.11	0.07	0.06	0.31	0.3
CG16800	2112959198	219	fj	Dict	0.514				0.84	0.35	0.16	0.16	0.06	0.938	0.763	0.909	0.355	0.932	0.705	0.952	0.857	0.956	0.929	2.0627	0.0575182	0.928	0.152	0.894	0.152	0.921	0.152	0.941	0.152	0.953	0.152	0.59	0.54	0.46	0.61	0.39	0.27	0.29	0.29	0.37	0.34
CG16800	2112959198	219	limk1	Dict	0.5632		**		0.03	0.2	0.47	0.05	0.21	0.738	0.462	0.663	0.171	0.724	0.399	0.769	0.562	0.782	0.695	0.4325	0.0575182	0.735	0.152	0.66	0.152	0.721	0.152	0.762	0.152	0.797	0.152	0.14	0.08	0.52	0.45	0.22	0.39	0.19	0.16	0.31	0.31
CG16800	2112959198	219	mats	Dict	0.6384				0.58	0.58	0.2	0.15	0.19	0.892	0.685	0.853	0.318	0.882	0.628	0.899	0.766	0.9	0.866	3.5887	0.0575182	0.884	0.152	0.843	0.152	0.875	0.152	0.897	0.152	0.918	0.152	0.72	0.65	0.54	0.62	0.07	0.12	0.01	0.04	0.07	0.04
CG16800	2112959198	219	neur	Dict	0.5076				0.45	0.24	0.14	0.21	0.46	0.814	0.539	0.742	0.227	0.798	0.476	0.833	0.64	0.843	0.761	2.4309	0.0575182	0.81	0.152	0.744	0.152	0.797	0.152	0.841	0.152	0.868	0.152	0.06	0.09	0.43	0.54	0.56	0.4	0.18	0.23	0.3	0.32
CG16800	2112959198	219	ptc	Dict	0.597				0.6	0.19	0.19	0.05	0.47	0.847	0.608	0.783	0.28	0.832	0.556	0.855	0.7	0.862	0.784	1.9546	0.0575182	0.831	0.152	0.769	0.152	0.813	0.152	0.863	0.152	0.884	0.152	0.46	0.46	0.19	0.39	0.58	0.48	0.06	0.01	0.05	0.01
CG16800	2112959198	219	sls	Dict	0.6684				0.72	0.33	0.05	0.14	0.22	0.84	0.68	0.801	0.314	0.832	0.622	0.857	0.744	0.874	0.801	0.5182	0.0575182	0.839	0.152	0.799	0.152	0.832	0.152	0.859	0.152	0.883	0.152	0.03	0.07	0.46	0.61	0.64	0.52	0.12	0.06	0.21	0.16
CG16800	2112959198	219	tai	Dict	0.5606				0.71	0.17	0.56	0.09	0.01	0.894	0.73	0.862	0.338	0.889	0.654	0.907	0.805	0.908	0.848	0.4654	0.0575182	0.899	0.152	0.868	0.152	0.893	0.152	0.908	0.152	0.921	0.152	0	0.07	0.78	0.84	0.33	0.1	0.31	0.32	0.15	0.14
CG16800	2112959198	219	tango14	Dict	0.6504				0.87	0.17	0.08	0.09	0.3	0.899	0.736	0.871	0.356	0.894	0.669	0.914	0.821	0.916	0.86	1.4426	0.0575182	0.909	0.152	0.875	0.152	0.902	0.152	0.923	0.152	0.932	0.152	0.16	0.13	0.48	0.67	0.77	0.62	0.08	0.02	0.09	0.05
CG16800	2112959198	219	trh	Dict	0.641		**		0.53	0.15	0.11	0.12	0.43	0.775	0.527	0.711	0.231	0.758	0.467	0.81	0.62	0.815	0.708	0.8179	0.0575182	0.778	0.152	0.714	0.152	0.764	0.152	0.808	0.152	0.854	0.152	0.09	0.08	0.37	0.52	0.61	0.45	0.21	0.27	0.06	0.09
CG17127	2110770508	205	brk	Dict	0.6202				0.23	0.77	0.25	0.5	0.11	0.919	0.718	0.886	0.323	0.914	0.651	0.937	0.802	0.946	0.885	2.1159	0.373723	0.925	0.152	0.883	0.152	0.916	0.152	0.939	0.152	0.957	0.152	0.69	0.71	0.37	0.36	0.24	0.17	0.03	0.08	0.36	0.33
CG17127	2110770508	205	bx	Dict	0.5845				0.2	0.83	0.2	0.29	0.05	0.899	0.714	0.867	0.309	0.895	0.651	0.907	0.792	0.914	0.858	1.1999	0.373723	0.901	0.152	0.863	0.152	0.894	0.152	0.918	0.152	0.934	0.152	0.79	0.8	0.29	0.26	0.25	0.22	0.02	0.06	0.34	0.32
CG17127	2110770508	205	cyce	Dict	0.6937				0.06	0.47	0.74	0.25	0.09	0.906	0.718	0.874	0.309	0.899	0.652	0.925	0.798	0.928	0.888	0.9349	0.373723	0.901	0.152	0.857	0.152	0.891	0.152	0.92	0.152	0.936	0.152	0.46	0.5	0.47	0.39	0.06	0.21	0.54	0.55	0.2	0.19
CG17127	2110770508	205	dally	Dict	0.5335				0.64	0.29	0.47	0.31	0.12	0.906	0.705	0.866	0.306	0.895	0.649	0.919	0.783	0.941	0.845	0.8955	0.373723	0.912	0.152	0.867	0.152	0.901	0.152	0.928	0.152	0.935	0.152	0.18	0.23	0.62	0.64	0.21	0.06	0.18	0.18	0.57	0.56
CG17127	2110770508	205	dll	Dict	0.5716				0.22	0.84	0.07	0.09	0.13	0.893	0.691	0.855	0.319	0.882	0.626	0.902	0.775	0.916	0.881	0.8412	0.373723	0.894	0.152	0.854	0.152	0.885	0.152	0.911	0.152	0.924	0.152	0.68	0.66	0.07	0.15	0.59	0.59	0.03	0.11	0.06	0.04
CG17127	2110770508	205	dpp	Dict	0.5426				0.44	0.75	0.19	0.01	0.02	0.891	0.7	0.852	0.316	0.883	0.644	0.907	0.794	0.913	0.856	0.4649	0.373723	0.891	0.152	0.853	0.152	0.884	0.152	0.902	0.152	0.92	0.152	0.58	0.59	0.35	0.4	0.49	0.42	0.15	0.2	0.22	0.21
CG17127	2110770508	205	ds	Dict	0.5322				0.39	0.84	0.12	0.23	0.09	0.937	0.759	0.903	0.356	0.929	0.684	0.943	0.852	0.947	0.903	5.7655	0.373723	0.932	0.152	0.898	0.152	0.925	0.152	0.944	0.152	0.956	0.152	0.89	0.85	0.21	0.26	0.14	0.21	0.26	0.31	0.22	0.21
CG17127	2110770508	205	ex	Dict	0.7664		*		0.04	0.82	0.43	0.12	0.04	0.914	0.73	0.883	0.322	0.91	0.661	0.92	0.832	0.947	0.875	5.4462	0.373723	0.918	0.152	0.88	0.152	0.909	0.152	0.929	0.152	0.944	0.152	0.82	0.81	0.21	0.17	0.21	0.15	0.42	0.47	0.01	0.01
CG17127	2110770508	205	nmo	Dict	0.5476				0.31	0.81	0.35	0.29	0.15	0.94	0.734	0.907	0.346	0.934	0.656	0.96	0.831	0.961	0.909	2.0873	0.373723	0.938	0.152	0.902	0.152	0.931	0.152	0.953	0.152	0.963	0.152	0.92	0.92	0.07	0.06	0.16	0.13	0.17	0.2	0.2	0.2
CG17127	2110770508	205	rho	Dict	0.7045		*		0.42	0.64	0.27	0.24	0.06	0.883	0.676	0.842	0.302	0.873	0.632	0.896	0.784	0.901	0.867	0.6139	0.373723	0.882	0.152	0.835	0.152	0.87	0.152	0.895	0.152	0.913	0.152	0.45	0.44	0.28	0.37	0.56	0.47	0.39	0.44	0.18	0.17
CG17127	2110770508	205	spi	Dict	0.5267				0.23	0.37	0.57	0.11	0.37	0.827	0.601	0.778	0.242	0.821	0.54	0.837	0.698	0.84	0.809	0.4719	0.373723	0.83	0.152	0.779	0.152	0.818	0.152	0.856	0.152	0.893	0.152	0.4	0.43	0.43	0.36	0.07	0.16	0.33	0.31	0.43	0.45
CG17127	2110770508	205	stan	Dict	0.6157		*		0.2	0.44	0.52	0.16	0.03	0.797	0.577	0.744	0.261	0.787	0.515	0.815	0.663	0.834	0.797	0.2999	0.373723	0.795	0.152	0.741	0.152	0.785	0.152	0.827	0.152	0.875	0.152	0.48	0.46	0.11	0.04	0.08	0.12	0.49	0.5	0.04	0.02
CG17127	2110770508	205	stg	Dict	0.558				0.25	0.54	0.35	0.48	0.09	0.864	0.657	0.816	0.263	0.854	0.585	0.882	0.756	0.884	0.858	1.0297	0.373723	0.866	0.152	0.81	0.152	0.852	0.152	0.889	0.152	0.914	0.152	0.63	0.59	0.01	0.07	0.07	0.06	0.41	0.44	0.37	0.33
CG17127	2110770508	205	tai	Dict	0.5127				0.71	0.17	0.56	0.09	0.01	0.894	0.73	0.862	0.338	0.889	0.654	0.907	0.805	0.908	0.848	0.4654	0.373723	0.899	0.152	0.868	0.152	0.893	0.152	0.908	0.152	0.921	0.152	0	0.07	0.78	0.84	0.33	0.1	0.31	0.32	0.15	0.14
CG17127	2110770508	205	tmod	Dict	0.5092				0.2	0.49	0.1	0.6	0.13	0.821	0.592	0.765	0.243	0.814	0.518	0.84	0.668	0.868	0.753	0.6584	0.373723	0.822	0.152	0.761	0.152	0.81	0.152	0.852	0.152	0.876	0.152	0.57	0.56	0.02	0.09	0.05	0.01	0.01	0.04	0.36	0.34
CG17127	2110770508	205	tx	Dict	0.6558				0.06	0.74	0.53	0.01	0.18	0.914	0.73	0.868	0.33	0.9	0.655	0.928	0.801	0.928	0.839	0.9684	0.373723	0.903	0.152	0.866	0.152	0.895	0.152	0.917	0.152	0.929	0.152	0.74	0.75	0.23	0.15	0.01	0.04	0.43	0.45	0.19	0.2
CG17150	3104880735	539	aret	Dict	0.6335				0.66	0.06	0.37	0.12	0	0.844	0.652	0.797	0.293	0.836	0.595	0.861	0.737	0.868	0.861	0.4688	0.765221	0.843	0.152	0.795	0.152	0.833	0.152	0.863	0.152	0.885	0.152	0.22	0.23	0.02	0.18	0.65	0.65	0.14	0.1	0.52	0.5
CG17150	3104880735	539	btd	Dict	0.8714		**		0.83	0.17	0.22	0.01	0.09	0.891	0.703	0.854	0.334	0.882	0.638	0.904	0.803	0.91	0.863	0.5246	0.765221	0.889	0.152	0.851	0.152	0.882	0.152	0.899	0.152	0.921	0.152	0.06	0.02	0.53	0.66	0.51	0.36	0.14	0.16	0.45	0.44
CG17150	3104880735	539	cg14147	Dict	0.6038		*		0.55	0.18	0.24	0.12	0.04	0.733	0.54	0.685	0.256	0.721	0.496	0.752	0.618	0.76	0.693	0.3374	0.765221	0.737	0.152	0.68	0.152	0.721	0.152	0.759	0.152	0.801	0.152	0.38	0.37	0.21	0.34	0.32	0.21	0.4	0.39	0.38	0.38
CG17150	3104880735	539	cg8654	Dict	0.6731		**		0.63	0.1	0.2	0.08	0.1	0.738	0.574	0.696	0.263	0.73	0.517	0.775	0.637	0.797	0.705	0.4142	0.765221	0.749	0.152	0.7	0.152	0.738	0.152	0.77	0.152	0.818	0.152	0.14	0.12	0.15	0.3	0.49	0.46	0.09	0.08	0.45	0.44
CG17150	3104880735	539	ct	Muta	0.6482		**		0.54	0.02	0.38	0.03	0.09	0.705	0.538	0.664	0.253	0.701	0.484	0.718	0.607	0.733	0.65	0.0056	0.765221	0.715	0.152	0.672	0.152	0.705	0.152	0.731	0.152	0.766	0.152	0.12	0.08	0.47	0.51	0.18	0.03	0.25	0.22	0.25	0.27
CG17150	3104880735	539	cv2	Dict	0.5779				0.56	0.49	0.08	0.38	0.25	0.87	0.685	0.828	0.295	0.86	0.6	0.893	0.763	0.898	0.844	0.5685	0.765221	0.859	0.152	0.814	0.152	0.85	0.152	0.878	0.152	0.914	0.152	0.31	0.35	0.38	0.43	0.3	0.25	0.13	0.11	0.62	0.59
CG17150	3104880735	539	dally	Dict	0.7679		*		0.64	0.29	0.47	0.31	0.12	0.906	0.705	0.866	0.306	0.895	0.649	0.919	0.783	0.941	0.845	0.8955	0.765221	0.912	0.152	0.867	0.152	0.901	0.152	0.928	0.152	0.935	0.152	0.18	0.23	0.62	0.64	0.21	0.06	0.18	0.18	0.57	0.56
CG17150	3104880735	539	dpp	Dict	0.5129				0.44	0.75	0.19	0.01	0.02	0.891	0.7	0.852	0.316	0.883	0.644	0.907	0.794	0.913	0.856	0.4649	0.765221	0.891	0.152	0.853	0.152	0.884	0.152	0.902	0.152	0.92	0.152	0.58	0.59	0.35	0.4	0.49	0.42	0.15	0.2	0.22	0.21
CG17150	3104880735	539	dsh	Dict	0.6169				0.68	0.51	0.24	0.14	0.1	0.91	0.72	0.873	0.33	0.9	0.649	0.92	0.793	0.934	0.84	1.1394	0.765221	0.91	0.152	0.871	0.152	0.9	0.152	0.923	0.152	0.937	0.152	0.68	0.66	0.19	0.35	0.33	0.27	0.26	0.26	0.32	0.3
CG17150	3104880735	539	egfr	Dict	0.6606		*		0.7	0.16	0.09	0.25	0.03	0.856	0.625	0.805	0.283	0.849	0.568	0.871	0.727	0.881	0.797	0.9394	0.765221	0.846	0.152	0.794	0.152	0.834	0.152	0.864	0.152	0.892	0.152	0.11	0.12	0.18	0.37	0.69	0.62	0.11	0.15	0.33	0.32
CG17150	3104880735	539	emc	Dict	0.5361				0.54	0.06	0.44	0.37	0.03	0.797	0.601	0.752	0.255	0.791	0.535	0.833	0.683	0.848	0.776	0.3552	0.765221	0.815	0.152	0.761	0.152	0.801	0.152	0.836	0.152	0.867	0.152	0.15	0.08	0.65	0.67	0.07	0.11	0.07	0.06	0.31	0.3
CG17150	3104880735	539	fj	Dict	0.718				0.84	0.35	0.16	0.16	0.06	0.938	0.763	0.909	0.355	0.932	0.705	0.952	0.857	0.956	0.929	2.0627	0.765221	0.928	0.152	0.894	0.152	0.921	0.152	0.941	0.152	0.953	0.152	0.59	0.54	0.46	0.61	0.39	0.27	0.29	0.29	0.37	0.34
CG17150	3104880735	539	kn	Dict	0.6331				0.64	0.28	0.11	0.11	0.28	0.824	0.637	0.777	0.296	0.81	0.565	0.844	0.703	0.867	0.779	0.3931	0.765221	0.815	0.152	0.763	0.152	0.803	0.152	0.833	0.152	0.858	0.152	0.43	0.39	0.35	0.43	0.14	0.05	0.01	0.04	0.51	0.51
CG17150	3104880735	539	mad	Dict	0.7324		*		0.84	0.08	0.2	0.2	0.07	0.894	0.724	0.866	0.359	0.887	0.661	0.91	0.811	0.922	0.847	0.5446	0.765221	0.889	0.152	0.854	0.152	0.881	0.152	0.901	0.152	0.907	0.152	0.2	0.16	0.38	0.54	0.57	0.49	0.28	0.25	0.5	0.46
CG17150	3104880735	539	mer	Dict	0.5255				0.55	0.22	0.26	0.44	0.25	0.801	0.584	0.747	0.252	0.783	0.511	0.832	0.672	0.836	0.714	0.5311	0.765221	0.805	0.152	0.756	0.152	0.794	0.152	0.829	0.152	0.878	0.152	0.03	0.03	0.1	0.25	0.57	0.55	0.11	0.08	0.08	0.08
CG17150	3104880735	539	sgg	Dict	0.6177				0.51	0.37	0.25	0.17	0.44	0.862	0.625	0.799	0.263	0.848	0.576	0.881	0.727	0.9	0.823	1.7731	0.765221	0.841	0.152	0.783	0.152	0.828	0.152	0.862	0.152	0.907	0.152	0.21	0.23	0.29	0.34	0.24	0.18	0.23	0.22	0.74	0.74
CG17150	3104880735	539	sls	Dict	0.5759				0.72	0.33	0.05	0.14	0.22	0.84	0.68	0.801	0.314	0.832	0.622	0.857	0.744	0.874	0.801	0.5182	0.765221	0.839	0.152	0.799	0.152	0.832	0.152	0.859	0.152	0.883	0.152	0.03	0.07	0.46	0.61	0.64	0.52	0.12	0.06	0.21	0.16
CG17150	3104880735	539	socs36e	Dict	0.6418				0.74	0.08	0.47	0.09	0.11	0.886	0.717	0.854	0.333	0.88	0.654	0.898	0.808	0.901	0.891	0.4292	0.765221	0.88	0.152	0.846	0.152	0.872	0.152	0.895	0.152	0.911	0.152	0.19	0.17	0.15	0.33	0.64	0.63	0.43	0.39	0.26	0.24
CG17150	3104880735	539	tai	Dict	0.6943				0.71	0.17	0.56	0.09	0.01	0.894	0.73	0.862	0.338	0.889	0.654	0.907	0.805	0.908	0.848	0.4654	0.765221	0.899	0.152	0.868	0.152	0.893	0.152	0.908	0.152	0.921	0.152	0	0.07	0.78	0.84	0.33	0.1	0.31	0.32	0.15	0.14
CG17150	3104880735	539	tango14	Dict	0.7059				0.87	0.17	0.08	0.09	0.3	0.899	0.736	0.871	0.356	0.894	0.669	0.914	0.821	0.916	0.86	1.4426	0.765221	0.909	0.152	0.875	0.152	0.902	0.152	0.923	0.152	0.932	0.152	0.16	0.13	0.48	0.67	0.77	0.62	0.08	0.02	0.09	0.05
CG17150	3104880735	539	ubx	Dict	0.5139				0.45	0.7	0.38	0.06	0.15	0.916	0.737	0.881	0.325	0.908	0.669	0.924	0.823	0.952	0.891	0.6049	0.765221	0.91	0.152	0.876	0.152	0.902	0.152	0.929	0.152	0.943	0.152	0.74	0.7	0.38	0.42	0.12	0.27	0.29	0.22	0.23	0.25
CG17150	3104880735	539	vg	Dict	0.5031		*		0.44	0.05	0.07	0.02	0	0.652	0.421	0.579	0.174	0.634	0.373	0.685	0.505	0.717	0.583	2.5051	0.765221	0.654	0.152	0.582	0.152	0.64	0.152	0.697	0.152	0.75	0.152	0.06	0.04	0.24	0.3	0.26	0.18	0.09	0.08	0.22	0.23
CG17564	2119280141	278	ap	Dict	0.5929				0.13	0.81	0.11	0.15	0.22	0.856	0.666	0.815	0.299	0.847	0.607	0.87	0.745	0.871	0.826	0.394	0.0491553	0.86	0.152	0.82	0.152	0.852	0.152	0.875	0.152	0.892	0.152	0.74	0.76	0.27	0.23	0.17	0.16	0.1	0.06	0.21	0.18
CG17564	2119280141	278	bx	Dict	0.5952				0.2	0.83	0.2	0.29	0.05	0.899	0.714	0.867	0.309	0.895	0.651	0.907	0.792	0.914	0.858	1.1999	0.0491553	0.901	0.152	0.863	0.152	0.894	0.152	0.918	0.152	0.934	0.152	0.79	0.8	0.29	0.26	0.25	0.22	0.02	0.06	0.34	0.32
CG17564	2119280141	278	dgo	Dict	0.5222				0.31	0.6	0.04	0.22	0.16	0.815	0.614	0.762	0.276	0.801	0.553	0.832	0.684	0.856	0.801	0.4284	0.0491553	0.789	0.152	0.742	0.152	0.777	0.152	0.819	0.152	0.84	0.152	0.66	0.61	0.24	0.26	0.17	0.23	0.22	0.26	0.23	0.21
CG17564	2119280141	278	dll	Dict	0.5316				0.22	0.84	0.07	0.09	0.13	0.893	0.691	0.855	0.319	0.882	0.626	0.902	0.775	0.916	0.881	0.8412	0.0491553	0.894	0.152	0.854	0.152	0.885	0.152	0.911	0.152	0.924	0.152	0.68	0.66	0.07	0.15	0.59	0.59	0.03	0.11	0.06	0.04
CG17564	2119280141	278	ds	Dict	0.6861				0.39	0.84	0.12	0.23	0.09	0.937	0.759	0.903	0.356	0.929	0.684	0.943	0.852	0.947	0.903	5.7655	0.0491553	0.932	0.152	0.898	0.152	0.925	0.152	0.944	0.152	0.956	0.152	0.89	0.85	0.21	0.26	0.14	0.21	0.26	0.31	0.22	0.21
CG17564	2119280141	278	dsh	Dict	0.5994				0.68	0.51	0.24	0.14	0.1	0.91	0.72	0.873	0.33	0.9	0.649	0.92	0.793	0.934	0.84	1.1394	0.0491553	0.91	0.152	0.871	0.152	0.9	0.152	0.923	0.152	0.937	0.152	0.68	0.66	0.19	0.35	0.33	0.27	0.26	0.26	0.32	0.3
CG17564	2119280141	278	ex	Dict	0.6578				0.04	0.82	0.43	0.12	0.04	0.914	0.73	0.883	0.322	0.91	0.661	0.92	0.832	0.947	0.875	5.4462	0.0491553	0.918	0.152	0.88	0.152	0.909	0.152	0.929	0.152	0.944	0.152	0.82	0.81	0.21	0.17	0.21	0.15	0.42	0.47	0.01	0.01
CG17564	2119280141	278	ft	Dict	0.5475				0.39	0.75	0.08	0.35	0.1	0.927	0.72	0.889	0.323	0.919	0.649	0.933	0.808	0.941	0.888	4.3023	0.0491553	0.916	0.152	0.877	0.152	0.907	0.152	0.938	0.152	0.95	0.152	0.77	0.7	0.42	0.43	0.25	0.36	0.22	0.28	0.21	0.2
CG17564	2119280141	278	fz	Dict	0.5013				0.06	0.7	0.17	0.26	0.24	0.85	0.643	0.804	0.281	0.839	0.574	0.861	0.74	0.866	0.798	0.4509	0.0491553	0.841	0.152	0.79	0.152	0.826	0.152	0.861	0.152	0.882	0.152	0.77	0.78	0.15	0.08	0.06	0.08	0.02	0.03	0.39	0.4
CG17564	2119280141	278	mats	Dict	0.5439				0.58	0.58	0.2	0.15	0.19	0.892	0.685	0.853	0.318	0.882	0.628	0.899	0.766	0.9	0.866	3.5887	0.0491553	0.884	0.152	0.843	0.152	0.875	0.152	0.897	0.152	0.918	0.152	0.72	0.65	0.54	0.62	0.07	0.12	0.01	0.04	0.07	0.04
CG17564	2119280141	278	nmo	Dict	0.7321				0.31	0.81	0.35	0.29	0.15	0.94	0.734	0.907	0.346	0.934	0.656	0.96	0.831	0.961	0.909	2.0873	0.0491553	0.938	0.152	0.902	0.152	0.931	0.152	0.953	0.152	0.963	0.152	0.92	0.92	0.07	0.06	0.16	0.13	0.17	0.2	0.2	0.2
CG17564	2119280141	278	sd	Dict	0.509				0.34	0.63	0.37	0.24	0.02	0.856	0.667	0.823	0.286	0.851	0.597	0.87	0.767	0.871	0.849	5.3633	0.0491553	0.87	0.152	0.824	0.152	0.861	0.152	0.885	0.152	0.905	0.152	0.7	0.64	0.42	0.45	0.08	0.25	0.3	0.25	0.11	0.09
CG17564	2119280141	278	tmod	Dict	0.5783				0.2	0.49	0.1	0.6	0.13	0.821	0.592	0.765	0.243	0.814	0.518	0.84	0.668	0.868	0.753	0.6584	0.0491553	0.822	0.152	0.761	0.152	0.81	0.152	0.852	0.152	0.876	0.152	0.57	0.56	0.02	0.09	0.05	0.01	0.01	0.04	0.36	0.34
CG17564	2119280141	278	tx	Dict	0.5943				0.06	0.74	0.53	0.01	0.18	0.914	0.73	0.868	0.33	0.9	0.655	0.928	0.801	0.928	0.839	0.9684	0.0491553	0.903	0.152	0.866	0.152	0.895	0.152	0.917	0.152	0.929	0.152	0.74	0.75	0.23	0.15	0.01	0.04	0.43	0.45	0.19	0.2
CG17564	2119280141	278	ubx	Dict	0.6473				0.45	0.7	0.38	0.06	0.15	0.916	0.737	0.881	0.325	0.908	0.669	0.924	0.823	0.952	0.891	0.6049	0.0491553	0.91	0.152	0.876	0.152	0.902	0.152	0.929	0.152	0.943	0.152	0.74	0.7	0.38	0.42	0.12	0.27	0.29	0.22	0.23	0.25
CG17564	2119280141	278	wts	Dict	0.5645				0.36	0.69	0.38	0.08	0.22	0.894	0.718	0.857	0.324	0.886	0.645	0.917	0.809	0.926	0.882	0.9344	0.0491553	0.887	0.152	0.845	0.152	0.877	0.152	0.901	0.152	0.918	0.152	0.79	0.77	0.09	0.2	0.16	0.12	0.41	0.42	0.22	0.24
CG17580	2208696947	344	ct	Muta	0.5518		*		0.54	0.02	0.38	0.03	0.09	0.705	0.538	0.664	0.253	0.701	0.484	0.718	0.607	0.733	0.65	0.0056	0.267983	0.715	0.152	0.672	0.152	0.705	0.152	0.731	0.152	0.766	0.152	0.12	0.08	0.47	0.51	0.18	0.03	0.25	0.22	0.25	0.27
CG17580	2208696947	344	dally	Dict	0.5047				0.64	0.29	0.47	0.31	0.12	0.906	0.705	0.866	0.306	0.895	0.649	0.919	0.783	0.941	0.845	0.8955	0.267983	0.912	0.152	0.867	0.152	0.901	0.152	0.928	0.152	0.935	0.152	0.18	0.23	0.62	0.64	0.21	0.06	0.18	0.18	0.57	0.56
CG17580	2208696947	344	ft	Dict	0.5092				0.39	0.75	0.08	0.35	0.1	0.927	0.72	0.889	0.323	0.919	0.649	0.933	0.808	0.941	0.888	4.3023	0.267983	0.916	0.152	0.877	0.152	0.907	0.152	0.938	0.152	0.95	0.152	0.77	0.7	0.42	0.43	0.25	0.36	0.22	0.28	0.21	0.2
CG17580	2208696947	344	mats	Dict	0.6743				0.58	0.58	0.2	0.15	0.19	0.892	0.685	0.853	0.318	0.882	0.628	0.899	0.766	0.9	0.866	3.5887	0.267983	0.884	0.152	0.843	0.152	0.875	0.152	0.897	0.152	0.918	0.152	0.72	0.65	0.54	0.62	0.07	0.12	0.01	0.04	0.07	0.04
CG17580	2208696947	344	med	Dict	0.5012				0.17	0.63	0.24	0.37	0.19	0.855	0.625	0.8	0.281	0.843	0.558	0.875	0.718	0.896	0.847	0.768	0.267983	0.84	0.152	0.789	0.152	0.828	0.152	0.862	0.152	0.893	0.152	0.54	0.51	0.21	0.19	0.24	0.32	0.14	0.06	0.15	0.1
CG17580	2208696947	344	s6k	Dict	0.5483				0.41	0.16	0.42	0.15	0.43	0.797	0.575	0.75	0.247	0.785	0.514	0.818	0.673	0.836	0.777	0.3905	0.267983	0.79	0.152	0.728	0.152	0.774	0.152	0.814	0.152	0.852	0.152	0.22	0.16	0.48	0.46	0.17	0.29	0.14	0.09	0.47	0.48
CG17580	2208696947	344	sd	Dict	0.7022		*		0.34	0.63	0.37	0.24	0.02	0.856	0.667	0.823	0.286	0.851	0.597	0.87	0.767	0.871	0.849	5.3633	0.267983	0.87	0.152	0.824	0.152	0.861	0.152	0.885	0.152	0.905	0.152	0.7	0.64	0.42	0.45	0.08	0.25	0.3	0.25	0.11	0.09
CG17580	2208696947	344	ser	Dict	0.5564				0.11	0.78	0.3	0.27	0.16	0.893	0.688	0.842	0.31	0.879	0.621	0.905	0.793	0.918	0.869	0.4217	0.267983	0.876	0.152	0.833	0.152	0.868	0.152	0.891	0.152	0.919	0.152	0.69	0.66	0.2	0.16	0.36	0.45	0.2	0.11	0.1	0.06
CG17580	2208696947	344	tai	Dict	0.6662				0.71	0.17	0.56	0.09	0.01	0.894	0.73	0.862	0.338	0.889	0.654	0.907	0.805	0.908	0.848	0.4654	0.267983	0.899	0.152	0.868	0.152	0.893	0.152	0.908	0.152	0.921	0.152	0	0.07	0.78	0.84	0.33	0.1	0.31	0.32	0.15	0.14
CG17580	2208696947	344	ubx	Dict	0.6346				0.45	0.7	0.38	0.06	0.15	0.916	0.737	0.881	0.325	0.908	0.669	0.924	0.823	0.952	0.891	0.6049	0.267983	0.91	0.152	0.876	0.152	0.902	0.152	0.929	0.152	0.943	0.152	0.74	0.7	0.38	0.42	0.12	0.27	0.29	0.22	0.23	0.25
CG17580	2208696947	344	yki	Dict	0.5283		*		0.25	0.37	0.29	0.38	0.05	0.708	0.492	0.653	0.208	0.693	0.424	0.741	0.58	0.745	0.684	1.8695	0.267983	0.696	0.152	0.646	0.152	0.684	0.152	0.734	0.152	0.761	0.152	0.39	0.36	0.27	0.29	0	0.11	0.27	0.24	0.18	0.15
CG17646	2101748048	127	bsk	Dict	0.5869		*		0.12	0.05	0.62	0.23	0.07	0.742	0.522	0.689	0.218	0.733	0.458	0.75	0.61	0.791	0.715	0.6289	0.194255	0.771	0.152	0.715	0.152	0.759	0.152	0.802	0.152	0.862	0.152	0.22	0.28	0.54	0.4	0.36	0.51	0.22	0.19	0.51	0.49
CG17646	2101748048	127	caup	Dict	0.5178		*		0.39	0.27	0.36	0.28	0.08	0.739	0.514	0.677	0.216	0.722	0.459	0.77	0.596	0.771	0.643	0.3834	0.194255	0.746	0.152	0.685	0.152	0.729	0.152	0.769	0.152	0.794	0.152	0.08	0.11	0.36	0.43	0.31	0.18	0.42	0.43	0.06	0.06
CG17646	2101748048	127	cyce	Dict	0.551				0.06	0.47	0.74	0.25	0.09	0.906	0.718	0.874	0.309	0.899	0.652	0.925	0.798	0.928	0.888	0.9349	0.194255	0.901	0.152	0.857	0.152	0.891	0.152	0.92	0.152	0.936	0.152	0.46	0.5	0.47	0.39	0.06	0.21	0.54	0.55	0.2	0.19
CG17646	2101748048	127	ex	Dict	0.6142				0.04	0.82	0.43	0.12	0.04	0.914	0.73	0.883	0.322	0.91	0.661	0.92	0.832	0.947	0.875	5.4462	0.194255	0.918	0.152	0.88	0.152	0.909	0.152	0.929	0.152	0.944	0.152	0.82	0.81	0.21	0.17	0.21	0.15	0.42	0.47	0.01	0.01
CG17646	2101748048	127	hh	Dict	0.5003				0.06	0.4	0.21	0.41	0.25	0.803	0.507	0.73	0.204	0.783	0.439	0.832	0.587	0.842	0.718	1.466	0.194255	0.792	0.152	0.721	0.152	0.776	0.152	0.828	0.152	0.888	0.152	0.37	0.39	0.3	0.3	0.25	0.15	0.14	0.17	0.55	0.54
CG17646	2101748048	127	neur	Dict	0.5162				0.45	0.24	0.14	0.21	0.46	0.814	0.539	0.742	0.227	0.798	0.476	0.833	0.64	0.843	0.761	2.4309	0.194255	0.81	0.152	0.744	0.152	0.797	0.152	0.841	0.152	0.868	0.152	0.06	0.09	0.43	0.54	0.56	0.4	0.18	0.23	0.3	0.32
CG17646	2101748048	127	rho	Dict	0.596				0.42	0.64	0.27	0.24	0.06	0.883	0.676	0.842	0.302	0.873	0.632	0.896	0.784	0.901	0.867	0.6139	0.194255	0.882	0.152	0.835	0.152	0.87	0.152	0.895	0.152	0.913	0.152	0.45	0.44	0.28	0.37	0.56	0.47	0.39	0.44	0.18	0.17
CG17646	2101748048	127	stg	Dict	0.5114				0.25	0.54	0.35	0.48	0.09	0.864	0.657	0.816	0.263	0.854	0.585	0.882	0.756	0.884	0.858	1.0297	0.194255	0.866	0.152	0.81	0.152	0.852	0.152	0.889	0.152	0.914	0.152	0.63	0.59	0.01	0.07	0.07	0.06	0.41	0.44	0.37	0.33
CG17646	2101748048	127	tai	Dict	0.719				0.71	0.17	0.56	0.09	0.01	0.894	0.73	0.862	0.338	0.889	0.654	0.907	0.805	0.908	0.848	0.4654	0.194255	0.899	0.152	0.868	0.152	0.893	0.152	0.908	0.152	0.921	0.152	0	0.07	0.78	0.84	0.33	0.1	0.31	0.32	0.15	0.14
CG17646	2101748048	127	tx	Dict	0.5371				0.06	0.74	0.53	0.01	0.18	0.914	0.73	0.868	0.33	0.9	0.655	0.928	0.801	0.928	0.839	0.9684	0.194255	0.903	0.152	0.866	0.152	0.895	0.152	0.917	0.152	0.929	0.152	0.74	0.75	0.23	0.15	0.01	0.04	0.43	0.45	0.19	0.2
CG1887	3101903280	499	ap	Dict	0.5184				0.13	0.81	0.11	0.15	0.22	0.856	0.666	0.815	0.299	0.847	0.607	0.87	0.745	0.871	0.826	0.394	0.569443	0.86	0.152	0.82	0.152	0.852	0.152	0.875	0.152	0.892	0.152	0.74	0.76	0.27	0.23	0.17	0.16	0.1	0.06	0.21	0.18
CG1887	3101903280	499	brk	Dict	0.505				0.23	0.77	0.25	0.5	0.11	0.919	0.718	0.886	0.323	0.914	0.651	0.937	0.802	0.946	0.885	2.1159	0.569443	0.925	0.152	0.883	0.152	0.916	0.152	0.939	0.152	0.957	0.152	0.69	0.71	0.37	0.36	0.24	0.17	0.03	0.08	0.36	0.33
CG1887	3101897452	497	bsk	Dict	0.5014				0.12	0.05	0.62	0.23	0.07	0.742	0.522	0.689	0.218	0.733	0.458	0.75	0.61	0.791	0.715	0.6289	0.0590223	0.771	0.152	0.715	0.152	0.759	0.152	0.802	0.152	0.862	0.152	0.22	0.28	0.54	0.4	0.36	0.51	0.22	0.19	0.51	0.49
CG1887	3101903280	499	bun	Dict	0.6072				0.18	0.78	0.06	0.17	0.19	0.885	0.664	0.841	0.31	0.875	0.609	0.91	0.742	0.935	0.885	0.7822	0.569443	0.887	0.152	0.834	0.152	0.874	0.152	0.905	0.152	0.925	0.152	0.54	0.52	0.04	0.14	0.61	0.58	0.13	0.22	0.05	0.09
CG1887	3101903280	499	bx	Dict	0.5811				0.2	0.83	0.2	0.29	0.05	0.899	0.714	0.867	0.309	0.895	0.651	0.907	0.792	0.914	0.858	1.1999	0.569443	0.901	0.152	0.863	0.152	0.894	0.152	0.918	0.152	0.934	0.152	0.79	0.8	0.29	0.26	0.25	0.22	0.02	0.06	0.34	0.32
CG1887	3101897452	497	cg33299	Dict	0.525		*		0.12	0.4	0.25	0.04	0.13	0.694	0.445	0.623	0.173	0.677	0.379	0.725	0.555	0.757	0.669	0.2309	0.0590223	0.674	0.152	0.605	0.152	0.658	0.152	0.702	0.152	0.723	0.152	0.38	0.36	0.07	0.06	0.21	0.25	0.26	0.2	0.16	0.19
CG1887	3101903280	499	d	Dict	0.5028		*		0.16	0.46	0.09	0.05	0.56	0.732	0.49	0.664	0.199	0.718	0.433	0.759	0.581	0.795	0.674	0.2325	0.569443	0.728	0.152	0.67	0.152	0.715	0.152	0.75	0.152	0.79	0.152	0.42	0.39	0.05	0.02	0.29	0.29	0.05	0.03	0.37	0.4
CG1887	3101903280	499	dgo	Dict	0.7272		**		0.31	0.6	0.04	0.22	0.16	0.815	0.614	0.762	0.276	0.801	0.553	0.832	0.684	0.856	0.801	0.4284	0.569443	0.789	0.152	0.742	0.152	0.777	0.152	0.819	0.152	0.84	0.152	0.66	0.61	0.24	0.26	0.17	0.23	0.22	0.26	0.23	0.21
CG1887	3101903280	499	dll	Dict	0.6221				0.22	0.84	0.07	0.09	0.13	0.893	0.691	0.855	0.319	0.882	0.626	0.902	0.775	0.916	0.881	0.8412	0.569443	0.894	0.152	0.854	0.152	0.885	0.152	0.911	0.152	0.924	0.152	0.68	0.66	0.07	0.15	0.59	0.59	0.03	0.11	0.06	0.04
CG1887	3101903280	499	dlp	Dict	0.577				0.22	0.56	0.21	0.39	0.18	0.845	0.586	0.784	0.258	0.829	0.528	0.86	0.691	0.881	0.769	0.9958	0.569443	0.815	0.152	0.755	0.152	0.8	0.152	0.84	0.152	0.86	0.152	0.56	0.54	0.26	0.3	0.02	0.14	0.16	0.13	0.33	0.32
CG1887	3101903280	499	ds	Dict	0.9109		**		0.39	0.84	0.12	0.23	0.09	0.937	0.759	0.903	0.356	0.929	0.684	0.943	0.852	0.947	0.903	5.7655	0.569443	0.932	0.152	0.898	0.152	0.925	0.152	0.944	0.152	0.956	0.152	0.89	0.85	0.21	0.26	0.14	0.21	0.26	0.31	0.22	0.21
CG1887	3101903280	499	dsh	Dict	0.6601				0.68	0.51	0.24	0.14	0.1	0.91	0.72	0.873	0.33	0.9	0.649	0.92	0.793	0.934	0.84	1.1394	0.569443	0.91	0.152	0.871	0.152	0.9	0.152	0.923	0.152	0.937	0.152	0.68	0.66	0.19	0.35	0.33	0.27	0.26	0.26	0.32	0.3
CG1887	3101903280	499	ex	Dict	0.686				0.04	0.82	0.43	0.12	0.04	0.914	0.73	0.883	0.322	0.91	0.661	0.92	0.832	0.947	0.875	5.4462	0.569443	0.918	0.152	0.88	0.152	0.909	0.152	0.929	0.152	0.944	0.152	0.82	0.81	0.21	0.17	0.21	0.15	0.42	0.47	0.01	0.01
CG1887	3101903280	499	fj	Dict	0.7029				0.84	0.35	0.16	0.16	0.06	0.938	0.763	0.909	0.355	0.932	0.705	0.952	0.857	0.956	0.929	2.0627	0.569443	0.928	0.152	0.894	0.152	0.921	0.152	0.941	0.152	0.953	0.152	0.59	0.54	0.46	0.61	0.39	0.27	0.29	0.29	0.37	0.34
CG1887	3101903280	499	ft	Dict	0.9015		**		0.39	0.75	0.08	0.35	0.1	0.927	0.72	0.889	0.323	0.919	0.649	0.933	0.808	0.941	0.888	4.3023	0.569443	0.916	0.152	0.877	0.152	0.907	0.152	0.938	0.152	0.95	0.152	0.77	0.7	0.42	0.43	0.25	0.36	0.22	0.28	0.21	0.2
CG1887	3101903280	499	fz	Dict	0.5694				0.06	0.7	0.17	0.26	0.24	0.85	0.643	0.804	0.281	0.839	0.574	0.861	0.74	0.866	0.798	0.4509	0.569443	0.841	0.152	0.79	0.152	0.826	0.152	0.861	0.152	0.882	0.152	0.77	0.78	0.15	0.08	0.06	0.08	0.02	0.03	0.39	0.4
CG1887	3101903280	499	kn	Dict	0.5607				0.64	0.28	0.11	0.11	0.28	0.824	0.637	0.777	0.296	0.81	0.565	0.844	0.703	0.867	0.779	0.3931	0.569443	0.815	0.152	0.763	0.152	0.803	0.152	0.833	0.152	0.858	0.152	0.43	0.39	0.35	0.43	0.14	0.05	0.01	0.04	0.51	0.51
CG1887	3101903280	499	luna	Dict	0.5339				0.18	0.75	0.2	0.38	0.08	0.869	0.647	0.82	0.292	0.86	0.599	0.88	0.733	0.882	0.805	0.3695	0.569443	0.861	0.152	0.819	0.152	0.852	0.152	0.879	0.152	0.903	0.152	0.62	0.62	0.08	0.12	0.38	0.41	0.28	0.2	0.3	0.25
CG1887	3101903280	499	mats	Dict	0.7795		**		0.58	0.58	0.2	0.15	0.19	0.892	0.685	0.853	0.318	0.882	0.628	0.899	0.766	0.9	0.866	3.5887	0.569443	0.884	0.152	0.843	0.152	0.875	0.152	0.897	0.152	0.918	0.152	0.72	0.65	0.54	0.62	0.07	0.12	0.01	0.04	0.07	0.04
CG1887	3101903280	499	med	Dict	0.5634				0.17	0.63	0.24	0.37	0.19	0.855	0.625	0.8	0.281	0.843	0.558	0.875	0.718	0.896	0.847	0.768	0.569443	0.84	0.152	0.789	0.152	0.828	0.152	0.862	0.152	0.893	0.152	0.54	0.51	0.21	0.19	0.24	0.32	0.14	0.06	0.15	0.1
CG1887	3101897452	497	med	Dict	0.5198				0.17	0.63	0.24	0.37	0.19	0.855	0.625	0.8	0.281	0.843	0.558	0.875	0.718	0.896	0.847	0.768	0.0590223	0.84	0.152	0.789	0.152	0.828	0.152	0.862	0.152	0.893	0.152	0.54	0.51	0.21	0.19	0.24	0.32	0.14	0.06	0.15	0.1
CG1887	3101903280	499	nmo	Dict	0.7329				0.31	0.81	0.35	0.29	0.15	0.94	0.734	0.907	0.346	0.934	0.656	0.96	0.831	0.961	0.909	2.0873	0.569443	0.938	0.152	0.902	0.152	0.931	0.152	0.953	0.152	0.963	0.152	0.92	0.92	0.07	0.06	0.16	0.13	0.17	0.2	0.2	0.2
CG1887	3101897452	497	os	Dict	0.5679				0.36	0.12	0.65	0.28	0	0.816	0.603	0.775	0.255	0.808	0.547	0.844	0.699	0.858	0.789	0.2858	0.0590223	0.823	0.152	0.777	0.152	0.814	0.152	0.838	0.152	0.855	0.152	0.09	0.09	0.09	0.04	0.44	0.5	0.58	0.54	0.23	0.18
CG1887	3101903280	499	sav	Dict	0.5223				0.34	0.81	0.01	0.18	0.13	0.914	0.732	0.873	0.328	0.904	0.656	0.928	0.795	0.931	0.931	0.5947	0.569443	0.909	0.152	0.868	0.152	0.902	0.152	0.929	0.152	0.952	0.152	0.58	0.56	0.05	0.15	0.59	0.59	0.16	0.23	0.3	0.28
CG1887	3101903280	499	sd	Dict	0.6923		*		0.34	0.63	0.37	0.24	0.02	0.856	0.667	0.823	0.286	0.851	0.597	0.87	0.767	0.871	0.849	5.3633	0.569443	0.87	0.152	0.824	0.152	0.861	0.152	0.885	0.152	0.905	0.152	0.7	0.64	0.42	0.45	0.08	0.25	0.3	0.25	0.11	0.09
CG1887	3101903280	499	ser	Dict	0.7151		*		0.11	0.78	0.3	0.27	0.16	0.893	0.688	0.842	0.31	0.879	0.621	0.905	0.793	0.918	0.869	0.4217	0.569443	0.876	0.152	0.833	0.152	0.868	0.152	0.891	0.152	0.919	0.152	0.69	0.66	0.2	0.16	0.36	0.45	0.2	0.11	0.1	0.06
CG1887	3101903280	499	stg	Dict	0.6216				0.25	0.54	0.35	0.48	0.09	0.864	0.657	0.816	0.263	0.854	0.585	0.882	0.756	0.884	0.858	1.0297	0.569443	0.866	0.152	0.81	0.152	0.852	0.152	0.889	0.152	0.914	0.152	0.63	0.59	0.01	0.07	0.07	0.06	0.41	0.44	0.37	0.33
CG1887	3101903280	499	tx	Dict	0.5944				0.06	0.74	0.53	0.01	0.18	0.914	0.73	0.868	0.33	0.9	0.655	0.928	0.801	0.928	0.839	0.9684	0.569443	0.903	0.152	0.866	0.152	0.895	0.152	0.917	0.152	0.929	0.152	0.74	0.75	0.23	0.15	0.01	0.04	0.43	0.45	0.19	0.2
CG1887	3101903280	499	ubx	Dict	0.8196		*		0.45	0.7	0.38	0.06	0.15	0.916	0.737	0.881	0.325	0.908	0.669	0.924	0.823	0.952	0.891	0.6049	0.569443	0.91	0.152	0.876	0.152	0.902	0.152	0.929	0.152	0.943	0.152	0.74	0.7	0.38	0.42	0.12	0.27	0.29	0.22	0.23	0.25
CG1887	3101897452	497	ubx	Dict	0.555				0.45	0.7	0.38	0.06	0.15	0.916	0.737	0.881	0.325	0.908	0.669	0.924	0.823	0.952	0.891	0.6049	0.0590223	0.91	0.152	0.876	0.152	0.902	0.152	0.929	0.152	0.943	0.152	0.74	0.7	0.38	0.42	0.12	0.27	0.29	0.22	0.23	0.25
CG1887	3101903280	499	vn	Dict	0.5793		*		0.07	0.55	0.02	0.2	0.09	0.774	0.525	0.715	0.229	0.762	0.472	0.814	0.609	0.817	0.672	1.2207	0.569443	0.762	0.152	0.696	0.152	0.746	0.152	0.799	0.152	0.855	0.152	0.46	0.41	0.22	0.15	0.38	0.43	0.37	0.4	0.27	0.29
CG1887	3101903280	499	wg	Dict	0.5863		*		0.35	0.58	0.01	0.12	0.19	0.778	0.575	0.724	0.25	0.762	0.522	0.796	0.661	0.804	0.737	1.6659	0.569443	0.776	0.152	0.726	0.152	0.764	0.152	0.798	0.152	0.846	0.152	0.62	0.59	0.24	0.31	0.06	0.04	0.13	0.15	0.18	0.17
CG1887	3101903280	499	wts	Dict	0.7016				0.36	0.69	0.38	0.08	0.22	0.894	0.718	0.857	0.324	0.886	0.645	0.917	0.809	0.926	0.882	0.9344	0.569443	0.887	0.152	0.845	0.152	0.877	0.152	0.901	0.152	0.918	0.152	0.79	0.77	0.09	0.2	0.16	0.12	0.41	0.42	0.22	0.24
CG1927	3101969045	501	aret	Dict	0.5811				0.66	0.06	0.37	0.12	0	0.844	0.652	0.797	0.293	0.836	0.595	0.861	0.737	0.868	0.861	0.4688	1.2885	0.843	0.152	0.795	0.152	0.833	0.152	0.863	0.152	0.885	0.152	0.22	0.23	0.02	0.18	0.65	0.65	0.14	0.1	0.52	0.5
CG1927	3101969045	501	btd	Dict	0.5188				0.83	0.17	0.22	0.01	0.09	0.891	0.703	0.854	0.334	0.882	0.638	0.904	0.803	0.91	0.863	0.5246	1.2885	0.889	0.152	0.851	0.152	0.882	0.152	0.899	0.152	0.921	0.152	0.06	0.02	0.53	0.66	0.51	0.36	0.14	0.16	0.45	0.44
CG1927	3101969045	501	cg8654	Dict	0.5132				0.63	0.1	0.2	0.08	0.1	0.738	0.574	0.696	0.263	0.73	0.517	0.775	0.637	0.797	0.705	0.4142	1.2885	0.749	0.152	0.7	0.152	0.738	0.152	0.77	0.152	0.818	0.152	0.14	0.12	0.15	0.3	0.49	0.46	0.09	0.08	0.45	0.44
CG1927	3101969045	501	dgo	Dict	0.5671				0.31	0.6	0.04	0.22	0.16	0.815	0.614	0.762	0.276	0.801	0.553	0.832	0.684	0.856	0.801	0.4284	1.2885	0.789	0.152	0.742	0.152	0.777	0.152	0.819	0.152	0.84	0.152	0.66	0.61	0.24	0.26	0.17	0.23	0.22	0.26	0.23	0.21
CG1927	3101969045	501	ds	Dict	0.7562				0.39	0.84	0.12	0.23	0.09	0.937	0.759	0.903	0.356	0.929	0.684	0.943	0.852	0.947	0.903	5.7655	1.2885	0.932	0.152	0.898	0.152	0.925	0.152	0.944	0.152	0.956	0.152	0.89	0.85	0.21	0.26	0.14	0.21	0.26	0.31	0.22	0.21
CG1927	3101969045	501	dsh	Dict	0.8169		**		0.68	0.51	0.24	0.14	0.1	0.91	0.72	0.873	0.33	0.9	0.649	0.92	0.793	0.934	0.84	1.1394	1.2885	0.91	0.152	0.871	0.152	0.9	0.152	0.923	0.152	0.937	0.152	0.68	0.66	0.19	0.35	0.33	0.27	0.26	0.26	0.32	0.3
CG1927	3101969045	501	ex	Dict	0.5639				0.04	0.82	0.43	0.12	0.04	0.914	0.73	0.883	0.322	0.91	0.661	0.92	0.832	0.947	0.875	5.4462	1.2885	0.918	0.152	0.88	0.152	0.909	0.152	0.929	0.152	0.944	0.152	0.82	0.81	0.21	0.17	0.21	0.15	0.42	0.47	0.01	0.01
CG1927	3101969045	501	fj	Dict	0.8572		**		0.84	0.35	0.16	0.16	0.06	0.938	0.763	0.909	0.355	0.932	0.705	0.952	0.857	0.956	0.929	2.0627	1.2885	0.928	0.152	0.894	0.152	0.921	0.152	0.941	0.152	0.953	0.152	0.59	0.54	0.46	0.61	0.39	0.27	0.29	0.29	0.37	0.34
CG1927	3101969045	501	ft	Dict	0.6602				0.39	0.75	0.08	0.35	0.1	0.927	0.72	0.889	0.323	0.919	0.649	0.933	0.808	0.941	0.888	4.3023	1.2885	0.916	0.152	0.877	0.152	0.907	0.152	0.938	0.152	0.95	0.152	0.77	0.7	0.42	0.43	0.25	0.36	0.22	0.28	0.21	0.2
CG1927	3101969045	501	kn	Dict	0.5874				0.64	0.28	0.11	0.11	0.28	0.824	0.637	0.777	0.296	0.81	0.565	0.844	0.703	0.867	0.779	0.3931	1.2885	0.815	0.152	0.763	0.152	0.803	0.152	0.833	0.152	0.858	0.152	0.43	0.39	0.35	0.43	0.14	0.05	0.01	0.04	0.51	0.51
CG1927	3101969045	501	mad	Dict	0.65				0.84	0.08	0.2	0.2	0.07	0.894	0.724	0.866	0.359	0.887	0.661	0.91	0.811	0.922	0.847	0.5446	1.2885	0.889	0.152	0.854	0.152	0.881	0.152	0.901	0.152	0.907	0.152	0.2	0.16	0.38	0.54	0.57	0.49	0.28	0.25	0.5	0.46
CG1927	3101969045	501	mats	Dict	0.7356		*		0.58	0.58	0.2	0.15	0.19	0.892	0.685	0.853	0.318	0.882	0.628	0.899	0.766	0.9	0.866	3.5887	1.2885	0.884	0.152	0.843	0.152	0.875	0.152	0.897	0.152	0.918	0.152	0.72	0.65	0.54	0.62	0.07	0.12	0.01	0.04	0.07	0.04
[truncated: 7,504 more rows]

## Sheet: manual_interaction
gene	notes
A2bp1	interacts with ci, N, Su{H), kn, H, sens
Brd	interacts with H, neur, N, Dl,
Bx		with scalloped, yki, ft
cg10200 (hui)	knockdown effects wing
[truncated: 7 more rows]

## Sheet: Key
This file has all the vector correlations>0.5.
[truncated: 11 more rows]
